# Supplementary material for: Hypervalent iodine catalyzed transamidation of carboxamides with amines
Source: Royal Society of Chemistry journal article supplement (doi:10.1039/c2ra22459c), 2012-12-07
Supplement: c2ra22459c.pdf [file c2ra22459c.pdf]

## Supporting Information

### Hypervalent Iodine Catalyzed Transamidation of Carboxamides with Amines

**Rajeshwer Vanjari, Bharat Kumar Allam, and Krishna Nand Singh\***

**Department of Chemistry (Centre of Advanced Study), Faculty of Science,  
Banaras Hindu University, Varanasi 221005, India**

**\*E mail: [knsinghbhu@yahoo.co.in](mailto:knsinghbhu@yahoo.co.in)**

## Table of Contents

---

|                                                                                |                          |
|--------------------------------------------------------------------------------|--------------------------|
| <b>I. General Experimental Section.....</b>                                    | <b>J<sub>3</sub></b>     |
| <b>II. Experimental Procedures.....</b>                                        | <b>J<sub>4</sub></b>     |
| <b>III. Complete Optimization Table.....</b>                                   | <b>J<sub>5</sub></b>     |
| <b>IV. Characterization of Products.....</b>                                   | <b>J<sub>6-18</sub></b>  |
| <b>V. References.....</b>                                                      | <b>J<sub>18-19</sub></b> |
| <b>VI. Copies of <sup>1</sup>H and <sup>13</sup>C Spectra of Products.....</b> | <b>J<sub>20-88</sub></b> |

---

## I. General Experimental Section:

All the reagents were purchased from commercial suppliers and were used as such. The solvents used in the reactions were distilled and dried prior to use. All the reactions conducted under conventional heating were performed under air atmosphere in a Schlenk flask. Microwave reactions were performed using an Anton Paar Monowave 300 mono-mode microwave reactor with a sealed 10-mL vial containing teflon-coated magnetic stir bar. The microwave system contains a single magnetron that delivers up to 850 W installed microwave power in unpulsed mode over the full power range. The sophisticated software prevents thermal overshoots and the design of the microwave applicator provides utmost field density, which allows efficient heating, even of low-absorbing solvents at any scale. A precisely adjusted IR sensor reflects the internal reaction temperature up to 300 °C. Pressure control up to 30 bar is provided by a non-invasive hydraulic piston embedded in the swiveling cover. For cooling, the cavity is flushed with compressed air automatically after the programmed experiment has been processed. Column chromatography was performed using Merck silica gel (100-200 mesh). Thin layer chromatography (TLC) was performed using silica gel 60/KieselguhrF<sub>254</sub> pre-coated on aluminum sheets (thickness 0.2 mm), commercially available from Merck. Visualization of spots on TLC plate was accomplished with UV light and by staining in I<sub>2</sub> chamber.

All the melting points were determined in open capillary tubes and are uncorrected. <sup>1</sup>H and <sup>13</sup>C NMR spectra were recorded on 300 MHz and 75 MHz JEOL AL300 FTNMR spectrometer respectively at a temperature of 300 K. NMR chemical shifts are expressed in δ values with reference to tetramethylsilane (TMS) as internal standard. Product yields refer to isolated yields after column chromatography.

## II. Experimental procedures:

**a) General conventional experimental procedure:** Diacetoxyiodobenzene (DIB) (0.15 mmol, 48.3 mg) was added to a Schlenk flask, equipped with a rubber septum and teflon-coated stir bar, containing carboxamide (3 mmol) and amine (3 mmol). The resulting mixture was vigorously stirred at the appropriate temperature for a specified time. The progress of the reaction was monitored through TLC. After completion of the reaction, mixture was cooled to room temperature; distilled water (10 mL) was added and then extracted with ethyl acetate (3 × 10 mL). The combined organic phase was dried over Na<sub>2</sub>SO<sub>4</sub>, and then concentrated using rotary vacuum evaporator. The crude product was purified by column chromatography using a mixture of ethyl acetate/n-hexane as an eluent.

**b) General MW experimental procedure:** An oven-dried 10-mL microwave reaction vial containing a teflon-coated magnetic stir bar was charged with carboxamide (3 mmol), amine (3 mmol), and diacetoxyiodobenzene (DIB) (0.15 mmol, 48.3 mg). The vessel was sealed with a plastic microwave septum, stirred at room temperature for 5 min and then placed into the MW cavity for a specified temperature and time. After completion of reaction (TLC), the mixture was cooled to room temperature and worked-up as given in conventional method.

### III. Complete Optimization Table:

| Entry | Accelerator                             | mol (%)  | Solvent                                     | Conventional heating |           |           | MW heating |           |           |
|-------|-----------------------------------------|----------|---------------------------------------------|----------------------|-----------|-----------|------------|-----------|-----------|
|       |                                         |          |                                             | T (°C)               | t (h)     | Yield (%) | T (°C)     | t (min.)  | Yield (%) |
| 1.    | –                                       | –        | –                                           | 120                  | 24        | n.r       | 120        | 20        | n.r       |
| 2.    | <i>p</i> -TSA                           | 10       | –                                           | 120                  | 24        | 60        | 120        | 20        | 62        |
| 3.    | TFA                                     | 10       | –                                           | 120                  | 24        | 40        | 120        | 20        | 41        |
| 4.    | BF <sub>3</sub> ·Et <sub>2</sub> O      | 10       | –                                           | 120                  | 24        | 57        | 120        | 20        | 57        |
| 5.    | I <sub>2</sub>                          | 10       | –                                           | 120                  | 24        | 51        | 120        | 20        | 52        |
| 6.    | Zn(OAc) <sub>2</sub> ·2H <sub>2</sub> O | 10       | –                                           | 120                  | 24        | 20        | 120        | 20        | 23        |
| 7.    | CdI <sub>2</sub>                        | 10       | –                                           | 120                  | 24        | 33        | 120        | 20        | 39        |
| 8.    | FeCl <sub>3</sub>                       | 10       | –                                           | 120                  | 24        | 41        | 120        | 20        | 42        |
| 9.    | NiCl <sub>2</sub> ·6H <sub>2</sub> O    | 10       | –                                           | 120                  | 24        | 30        | 120        | 20        | 30        |
| 10.   | ZrOCl <sub>2</sub>                      | 10       | –                                           | 120                  | 24        | 40        | 120        | 20        | 41        |
| 11.   | KOH                                     | 10       | –                                           | 120                  | 24        | n.r       | 120        | 20        | n.r       |
| 12.   | DBU                                     | 10       | –                                           | 120                  | 24        | n.r       | 120        | 20        | n.r       |
| 13.   | TBAB                                    | 10       | –                                           | 120                  | 24        | trace     | 120        | 20        | trace     |
| 14.   | [BmIm]BF <sub>4</sub>                   | 10       | –                                           | 120                  | 24        | 50        | 120        | 20        | 55        |
| 15.   | DIB                                     | 10       | –                                           | 120                  | 24        | 81        | 120        | 20        | 83        |
| 16.   | <b>DIB</b>                              | <b>5</b> | –                                           | <b>120</b>           | <b>24</b> | <b>81</b> | <b>120</b> | <b>20</b> | <b>83</b> |
| 17.   | DIB                                     | 5        | –                                           | 120                  | 17        | 72        | 120        | 10        | 77        |
| 18.   | DIB                                     | 3        | –                                           | 120                  | 24        | 67        | 120        | 20        | 69        |
| 19.   | DIB                                     | 5        | Toluene                                     | 120                  | 24        | 18        | 120        | 20        | 27        |
| 20.   | DIB                                     | 5        | Xylene                                      | 120                  | 24        | 29        | 120        | 20        | 30        |
| 21.   | DIB                                     | 5        | Chlorobenzene                               | 120                  | 24        | 20        | 120        | 20        | 25        |
| 22.   | DIB                                     | 5        | DMSO                                        | 120                  | 24        | 19        | 120        | 20        | 21        |
| 23.   | DIB                                     | 5        | DMF                                         | 120                  | 24        | 24        | 120        | 20        | 27        |
| 24.   | DIB                                     | 5        | H <sub>2</sub> O                            | 100                  | 24        | 17        | 120        | 20        | 23        |
| 25.   | DIB                                     | 5        | <i>n</i> -C <sub>5</sub> H <sub>11</sub> OH | 120                  | 24        | n.r       | 120        | 20        | n.r       |

#### IV. Characterization of Products:

##### 1. N-Benzylformamide (3a)<sup>1</sup>:

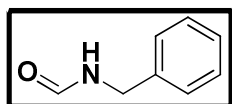

Colorless solid; m.p.: 59–60 °C.

<sup>1</sup>H NMR (300 MHz, CDCl<sub>3</sub>, TMS) δ/ppm: 8.28 (s, 0.8H), 8.23 (d, *J* = 12.0 Hz, 0.2H), 7.37–7.29 (m, 5H), 5.75 (br s, 1H, NH), 4.51 (d, *J* = 6 Hz, 1.8H), 4.44 (d, *J* = 6.3 Hz, 0.2H).

<sup>13</sup>C NMR (75 MHz, CDCl<sub>3</sub>, TMS) δ/ppm: 164.7, 161.3, 137.5, 128.6, 128.4, 127.7, 127.6, 127.4, 127.2, 45.4, 41.8.

##### 2. Piperidine-1-carbaldehyde (3b)<sup>2</sup>:

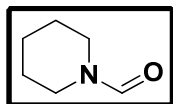

Colorless oil.

<sup>1</sup>H NMR (300 MHz, CDCl<sub>3</sub>, TMS) δ/ppm: 7.99 (s, 1H), 3.47 (t, *J* = 5.4 Hz, 2H), 3.32 (t, *J* = 5.4 Hz, 2H), 1.69–1.54 (m, 6H).

<sup>13</sup>C NMR (75 MHz, CDCl<sub>3</sub>, TMS) δ/ppm: 160.4, 46.4, 40.2, 26.2, 24.7, 24.3.

##### 3. N-Formylmorpholine (3c)<sup>3</sup>:

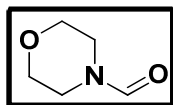

Colorless oil.

<sup>1</sup>H NMR (300 MHz, CDCl<sub>3</sub>, TMS) δ/ppm: 8.06 (s, 1H), 3.72–3.56 (m, 6H), 3.42–3.39 (m, 2H).

<sup>13</sup>C NMR (75 MHz, CDCl<sub>3</sub>, TMS) δ/ppm: 160.8, 67.1, 66.3, 45.7, 40.5.

4. **N-4-Tolylformamide(3d)**<sup>4</sup>:

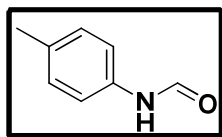

Colorless solid; m.p.: 53–54 °C.

<sup>1</sup>H NMR (300 MHz, CDCl<sub>3</sub>, TMS) δ/ppm: 9.05 (br s, 1H), 8.63 (d, *J* = 11.1 Hz, 1H), 8.39 (s, 1H), 8.27 (s, 1H), 7.43 (d, *J* = 7.5 Hz, 2H), 7.12–6.96 (m, 6H), 2.30/2.28 (each s, 6H).

<sup>13</sup>C NMR (75 MHz, CDCl<sub>3</sub>, TMS) δ/ppm: 163.1, 159.5, 134.8, 134.4, 134.2, 134.1, 130.0, 129.3, 120.1, 118.9, 20.7, 20.6.

5. **N-(4-Methoxyphenyl)formamide (3e)**<sup>5</sup>:

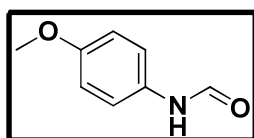

Light brownish solid; m.p.: 80–83 °C.

<sup>1</sup>H NMR (300 MHz, CDCl<sub>3</sub>, TMS) δ/ppm: 9.01 (br s, 1H, NH), 8.53 (d, *J* = 11.1 Hz, 1H), 8.46 (br s, 1H, NH), 8.24 (s, 1H), 7.45 (d, 2H), 7.03 (d, 2H), 6.87–6.79 (m, 4H), 3.77/3.75 (s, 6H).

<sup>13</sup>C NMR (75 MHz, CDCl<sub>3</sub>, TMS) δ/ppm: 163.3, 159.4, 157.3, 156.4, 130.0, 129.6, 121.8, 121.2, 114.7, 114.0, 55.3, 55.2.

IR (KBr Disc,  $\bar{\nu}/\text{Cm}^{-1}$ ): 3246, 3192, 3129, 3050, 3001, 2969, 2937, 2895, 1678, 1656, 1604, 1551, 1510, 1462, 1396, 1308, 1235, 1182, 1109, 1029, 835, 808, 783, 696.

6. **N-(2-Methoxyphenyl)formamide (3f)**<sup>6</sup>:

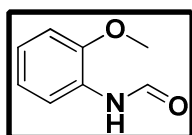

Brown solid; m.p.: 84–85 °C.

<sup>1</sup>H NMR (300 MHz, CDCl<sub>3</sub>, TMS) δ/ppm: 8.74 (d, *J* = 11.4 Hz, 1H), 8.44 (s, 1H), 8.37 (d, *J* = 6.9 Hz, 1H), 7.87 (s, 1H), 7.20–6.87 (m, 8H), 3.87 (s, 6H).

$^{13}\text{C}$  NMR (75 MHz,  $\text{CDCl}_3$ , TMS)  $\delta$ /ppm: 161.4, 158.7, 148.7, 147.7, 126.7, 126.1, 125.1, 124.2, 121.0, 120.4, 116.6, 111.2, 110.0, 55.6.

IR (KBr Disc,  $\bar{\nu}/\text{Cm}^{-1}$ ): 3254, 3008, 2922, 2937, 2835, 1694, 1659, 1597, 1535, 1460, 1396, 1287, 1227, 1182, 1109, 1029, 865, 813, 745.

7. *N*-(4-Chlorophenyl)formamide (**3g**)<sup>7</sup>:

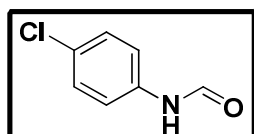

Grey solid; m.p.: 99–100 °C.

$^1\text{H}$  NMR (300 MHz,  $\text{CDCl}_3$ , TMS)  $\delta$ /ppm: 8.88 (br s, 1H), 8.67 (d,  $J = 11.4$  Hz, 1H), 8.34 (s, 1H), 7.99 (br s, 1H), 7.51 (d,  $J = 8.7$  Hz, 2H), 7.33 (m, 4H), 7.05 (d,  $J = 8.4$  Hz, 2H).

$^{13}\text{C}$  NMR (75 MHz,  $\text{CDCl}_3$ , TMS)  $\delta$ /ppm: 162.7, 159.3, 135.4, 135.3, 130.6, 129.7, 129.0, 121.2, 119.9.

8. *N*-(4-Nitrophenyl)formamide (**3h**)<sup>5</sup>:

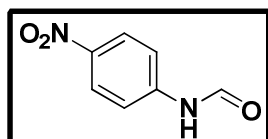

Yellow solid; m.p.: 197–199 °C.

$^1\text{H}$  NMR (300 MHz,  $\text{DMSO}-d_6$ , TMS)  $\delta$ /ppm: 10.77 (s, 1H), 9.03 (br s, 1H), 8.38 (s, 1H), 8.20 (d,  $J = 6.2$  Hz, 2H), 7.80 (d,  $J = 7.8$  Hz, 2H), 7.40 (br s, 1H).

$^{13}\text{C}$  NMR (75 MHz,  $\text{DMSO}-d_6$ , TMS)  $\delta$ /ppm: 162.7, 160.5, 144.2, 142.5, 125.4, 125.0, 119.0, 116.5.

IR (KBr Disc,  $\bar{\nu}/\text{Cm}^{-1}$ ): 3259, 3214, 3152, 3090, 3060, 3050, 2925, 2885, 2629, 1689, 1620, 1596, 1563, 1493, 1411, 1382, 1331, 1302, 1270, 1177, 1155, 1111, 853, 829, 752, 688.

9. *N*-(3-Hydroxyphenyl)formamide (**3i**)<sup>8</sup>:

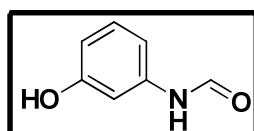



Brown solid; m.p.: 117–118 °C.

$^1\text{H}$  NMR (300 MHz, DMSO- $d_6$ , TMS)  $\delta$ /ppm: 10.02 (br s, 1H), 9.53 (s, 1H, OH), 9.42 (s, 1H), 8.72 (d,  $J$  = 11.1 Hz, 1H), 8.21 (s, 1H), 7.17–6.45 (m, 4H).

$^{13}\text{C}$  NMR (75 MHz, DMSO- $d_6$ , TMS)  $\delta$ /ppm: 162.5, 159.6, 158.3, 157.7, 139.5, 139.3, 130.3, 129.6, 110.9, 110.0, 108.1, 106.5, 104.8.

10. *N*-Methyl-*N*-phenylformamide (**3j**)<sup>9</sup>:

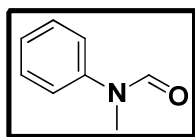

Colorless oil.

$^1\text{H}$  NMR (300 MHz, CDCl<sub>3</sub>, TMS)  $\delta$ /ppm: 8.46 (s, 1H), 7.43–7.15 (m, 5H), 3.31 (s, 3H).

$^{13}\text{C}$  NMR (75 MHz, CDCl<sub>3</sub>, TMS)  $\delta$ /ppm: 161.4, 161.3, 141.4, 128.8, 128.1, 125.4, 125.1, 122.5, 121.3, 30.9.

11. *N*-(Pyridin-2-yl)formamide (**3k**)<sup>10</sup>:

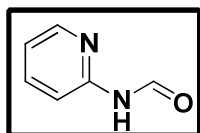

Yellow solid; m.p.: 70–71 °C

$^1\text{H}$  NMR (300 MHz, CDCl<sub>3</sub>, TMS)  $\delta$ /ppm: 10.68 (br s, 1H), 10.54 (br s, 1H), 9.36 (d,  $J$  = 9.9 Hz, 1H), 8.56 (s, 1H), 8.35–8.26 (m, 3H), 7.76–7.64 (m, 2H), 7.11–6.95 (m, 3H).

$^{13}\text{C}$  NMR (75 MHz, CDCl<sub>3</sub>, TMS)  $\delta$ /ppm: 163.2, 159.7, 151.0, 148.2, 147.1, 138.7, 138.5, 119.9, 119.6, 115.0, 110.4.

12. *N*-(2-Bromophenyl)formamide (**3l**)<sup>8</sup>:

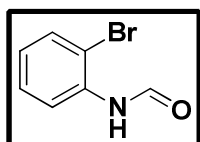

Colorless solid; m.p.: 91 °C.

**$^1\text{H}$  NMR (300 MHz,  $\text{CDCl}_3$ , TMS)**  $\delta$ /ppm: 8.72 (d, 1H), 8.49 (s, 1H), 8.40 (d,  $J = 8.1$  Hz, 1H), 7.67 (br s, 1H), 7.61–7.01 (m, 8H).

**$^{13}\text{C}$  NMR (75 MHz,  $\text{CDCl}_3$ , TMS)**  $\delta$ /ppm: 161.6, 158.9, 134.7, 133.4, 132.3, 128.6, 128.4, 126.3, 125.6, 122.1, 118.9, 113.0.

13. **N-Phenethylformamide (3m)**<sup>11</sup>:

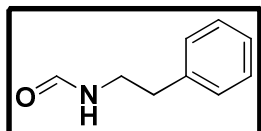

Colorless oil.

**$^1\text{H}$  NMR (300 MHz,  $\text{CDCl}_3$ , TMS)**  $\delta$ /ppm: 8.08 (s, 1H), 7.89 (d,  $J = 11.7$  Hz, 1H), 7.33–7.15 (m, 5H), 5.85 (br s, 1H, NH), 3.59–3.49 (m, 2H), 3.44 (t,  $J = 6.6$  Hz, 2H), 2.85–2.78 (m, 2H).

**$^{13}\text{C}$  NMR (75 MHz,  $\text{CDCl}_3$ , TMS)**  $\delta$ /ppm: 164.4, 161.2, 138.4, 128.7, 128.7, 128.6, 126.8, 126.5, 43.1, 39.1, 37.6, 35.4.

14. **N-Benzylacetamide (3o)**<sup>12</sup>:

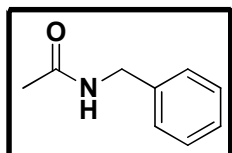

Brown solid; m.p.: 60–61 °C.

**$^1\text{H}$  NMR (300 MHz,  $\text{CDCl}_3$ , TMS)**  $\delta$ /ppm: 7.29–7.21 (m, 5H), 6.61 (br s, 1H), 4.34 (d,  $J = 3.9$  Hz, 2H), 1.93 (s, 3H).

**$^{13}\text{C}$  NMR (75 MHz,  $\text{CDCl}_3$ , TMS)**  $\delta$ /ppm: 170.1, 138.2, 128.4, 127.6, 127.2, 43.4, 22.9.

**IR (KBr Disc,  $\bar{\nu}/\text{Cm}^{-1}$ ):** 3295, 3063, 3033, 2928, 1647, 1548, 1499, 1454, 1374, 1357, 1221, 1162, 1097, 1033, 907, 741, 696.

15. **N-Phenylacetamide (3p)**<sup>13</sup>:

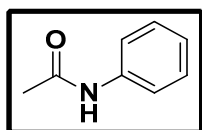

Colorless solid; m.p.: 113–114 °C.

$^1\text{H}$  NMR (300 MHz,  $\text{CDCl}_3$ , TMS)  $\delta$ /ppm: 8.50 (br s, 1H), 7.52 (d,  $J$  = 7.8 Hz, 2H), 7.28–7.23 (m, 2H), 7.08–7.06 (m, 1H), 2.11 (s, 3H).

$^{13}\text{C}$  NMR (75 MHz,  $\text{CDCl}_3$ , TMS)  $\delta$ /ppm: 169.2, 138.0, 128.7, 124.1, 120.2, 24.1.

16. N-(4-Chlorophenyl)acetamide (3q)<sup>14</sup>:

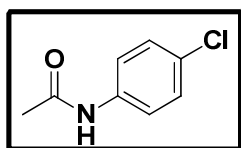

Yellow solid; m.p.: 177–178 °C.

$^1\text{H}$  NMR (300 MHz,  $\text{DMSO-}d_6$ , TMS)  $\delta$ /ppm: 10.03 (s, 1H), 7.60 (d,  $J$  = 6.3 Hz, 2H), 7.31 (d,  $J$  = 6.3 Hz, 2H), 2.03 (s, 3H).

$^{13}\text{C}$  NMR (75 MHz,  $\text{DMSO-}d_6$ , TMS)  $\delta$ /ppm: 168.5, 138.3, 128.5, 126.6, 120.5, 24.0.

17. N-(3-Hydroxyphenyl)acetamide (3r)<sup>15</sup>:

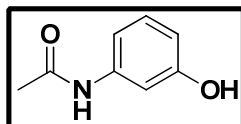

Colorless solid; m.p.: 148–149 °C.

$^1\text{H}$  NMR (300 MHz,  $\text{DMSO-}d_6$ , TMS)  $\delta$ /ppm: 9.77 (br s, 1H), 9.34 (s, 1H), 7.17 (s, 1H), 7.03 (t, 1H), 6.91 (d,  $J$  = 7.8 Hz, 1H), 6.42 (d,  $J$  = 6.9 Hz, 1H), 1.99 (s, 3H).

$^{13}\text{C}$  NMR (75 MHz,  $\text{CDCl}_3$ , TMS)  $\delta$ /ppm: 168.3, 157.6, 140.4, 129.3, 110.2, 109.9, 106.3, 24.1.

18. N-(4-Tolyl)acetamide (3s)<sup>16</sup>:

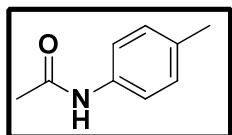

Colorless solid; m.p.: 149–150 °C.

$^1\text{H NMR}$  (300 MHz,  $\text{CDCl}_3$ , TMS)  $\delta$ /ppm: 7.83 (br s, 1H), 7.38 (d,  $J = 8.4$  Hz, 2H), 7.10 (d,  $J = 8.1$  Hz, 2H), 2.29 (s, 3H), 2.12 (s, 3H).

$^{13}\text{C NMR}$  (75 MHz,  $\text{CDCl}_3$ , TMS)  $\delta$ /ppm: 168.6, 135.4, 133.8, 129.3, 120.1, 24.3, 20.8.

19. N-(4-Methoxyphenyl)acetamide (**3t**)<sup>17</sup>:

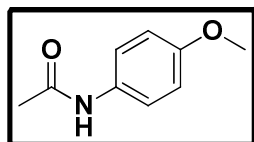

Colorless solid; m.p.: 126–128 °C.

$^1\text{H NMR}$  (300 MHz,  $\text{CDCl}_3$ , TMS)  $\delta$ /ppm: 8.04 (s, 1H), 7.39 (d,  $J = 8.7$  Hz, 2H), 6.81 (d,  $J = 8.7$  Hz, 2H), 3.76 (s, 3H), 2.10 (s, 3H).

$^{13}\text{C NMR}$  (75 MHz,  $\text{CDCl}_3$ , TMS)  $\delta$ /ppm: 168.7, 156.3, 131.1, 122.0, 113.9, 55.3, 24.1.

20. N-(2-Methoxyphenyl)acetamide (**3u**)<sup>18</sup>:

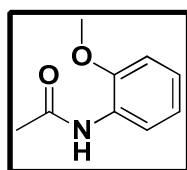

Colorless solid; m.p.: 87–88 °C.

$^1\text{H NMR}$  (300 MHz,  $\text{CDCl}_3$ , TMS)  $\delta$ /ppm: 8.35 (d,  $J = 7.8$  Hz, 1H), 7.77 (br s, NH), 7.04–6.84 (m, 4H), 3.86 (s, 3H), 2.19 (s, 3H).

$^{13}\text{C NMR}$  (75 MHz,  $\text{CDCl}_3$ , TMS)  $\delta$ /ppm: 168.1, 147.6, 127.6, 123.5, 120.9, 119.7, 109.8, 55.5, 24.8.

21. N'-Phenylacetohydrazide (**3v**)<sup>19</sup>:

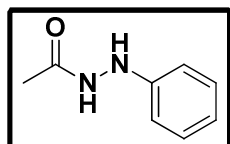

Pale brown solid; m.p.: 129–130 °C.

**<sup>1</sup>H NMR (300 MHz, CDCl<sub>3</sub>, TMS)** δ/ppm: 7.72 (br s, 1H, NH), 7.26–7.18 (m, 5H), 6.93–6.71 (m, 6H), 6.20 (br s, 1H, NH), 5.85 (br s, 1H, NH), 2.08/2.01 (s, 6H).

**<sup>13</sup>C NMR (75 MHz, CDCl<sub>3</sub>, TMS)** δ/ppm: 177.0, 170.3, 147.8, 147.0, 129.4, 129.1, 121.2, 121.1, 113.4, 112.4, 20.8, 19.1.

**IR (KBr Disc,  $\bar{\nu}$ /Cm<sup>-1</sup>):** 3287, 3234, 3031, 2928, 1665, 1643, 1597.

22. **N,2-Diphenylacetamide (3x)**<sup>20</sup>:

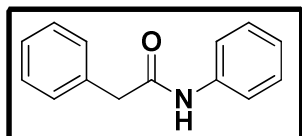

Colorless solid; m.p.: 115–116 °C.

**<sup>1</sup>H NMR (CDCl<sub>3</sub>, 300 MHz, TMS)** δ/ppm: 7.75 (br s, 1H), 7.43 (d, *J* = 7.8 Hz, 2H), 7.32–7.02 (m, 8H), 3.64 (s, 2H).

**<sup>13</sup>C NMR (CDCl<sub>3</sub>, 75 MHz, TMS)** δ/ppm: 169.4, 137.7, 134.5, 129.3, 128.9, 128.8, 127.4, 124.3, 119.9, 44.5.

**IR (KBr Disc,  $\bar{\nu}$ /Cm<sup>-1</sup>):** 3285, 3256, 3060, 1657, 1601, 1556, 1496, 1442, 1167, 755, 724, 691.

23. **N-Benzylbenzamide (3y)**<sup>21</sup>:

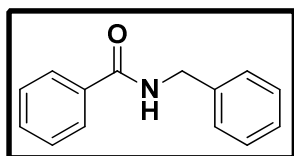

Colorless solid; m.p.: 101–102 °C.

**<sup>1</sup>H NMR (300 MHz, CDCl<sub>3</sub>, TMS)** δ/ppm: 7.80 (d, *J* = 6.9 Hz, 2H), 7.50–7.25 (m, 8H), 6.37 (br s, 1H), 4.67 (d, *J* = 5.4 Hz, 2H).

**<sup>13</sup>C NMR (75 MHz, CDCl<sub>3</sub>, TMS)** δ/ppm: 167.3, 138.2, 134.3, 131.4, 128.7, 128.5, 127.8, 127.5, 126.9, 44.0.

**IR (KBr Disc,  $\bar{\nu}$ /Cm<sup>-1</sup>):** 3291, 3061, 3030, 2926, 2853, 1638, 1602, 1550, 1452, 1417, 1362, 1260, 1151, 1056, 1027, 928, 726, 695.

24. N-Cyclohexylbenzamide (**3z**)<sup>22</sup>:

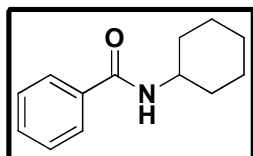

Colorless solid; m.p.: 156–157 °C.

<sup>1</sup>H NMR (300 MHz, CDCl<sub>3</sub>, TMS) δ/ppm: 7.76–7.74 (m, 2H), 7.47–7.38 (m, 3H), 6.09 (br s, 1H, NH), 4.03–3.91 (m, 1H, NHCH), 2.04–1.17 (m, 10H).

<sup>13</sup>C NMR (75 MHz, CDCl<sub>3</sub>, TMS) δ/ppm: 166.6, 135.0, 131.1, 128.4, 126.8, 48.6, 33.1, 25.5, 24.9.

IR (KBr Disc,  $\bar{\nu}$ /Cm<sup>-1</sup>): 3239, 3078, 2928, 2851, 1639, 1626, 1564, 1488, 1453, 1330, 1295, 1262, 1241, 1152, 1083, 1025, 1001, 970, 891, 849, 804, 700, 670.

25. N-Phenethylbenzamide (**3aa**)<sup>22</sup>:

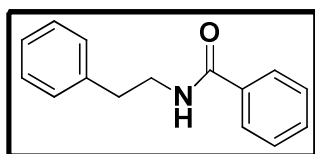

Colorless solid; m.p.: 117–118 °C.

<sup>1</sup>H NMR (300 MHz, CDCl<sub>3</sub>, TMS) δ/ppm: 7.66 (d, *J* = 7.2 Hz, 2H), 7.47–7.19 (m, 8H), 6.11 (br s, 1H, NH), 3.72–3.66 (m, 2H), 2.90 (t, 2H).

<sup>13</sup>C NMR (75 MHz, CDCl<sub>3</sub>, TMS) δ/ppm: 167.5, 138.8, 134.5, 131.3, 128.7, 128.5, 128.4, 126.7, 41.1, 35.6.

26. N-Cyclopropylbenzamide (**3ab**)<sup>23</sup>:

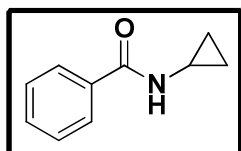

Colorless solid; m.p.: 94–95 °C.

<sup>1</sup>H NMR (300 MHz, CDCl<sub>3</sub>, TMS) δ/ppm: 7.74 (d, *J* = 6.9 Hz, 2H), 7.50–7.38 (m, 3H), 6.34 (br s, 1H, NH), 2.91–2.88 (m, 1H), 0.87 (br s, 2H), 0.62 (br s, 2H).

**<sup>13</sup>C NMR (75 MHz, CDCl<sub>3</sub>, TMS)** δ/ppm: 168.9, 134.4, 131.4, 128.6, 128.5, 127.2, 126.8, 125.8, 31.9, 23.1, 6.7.

**IR (KBr Disc,  $\bar{\nu}$ /Cm<sup>-1</sup>):** 3303, 2924, 2852, 1641, 1531, 1488, 1310, 1050, 1027, 862, 799, 693, 667.

27. **N-Hexylbenzamide (3ac)**<sup>24</sup>:

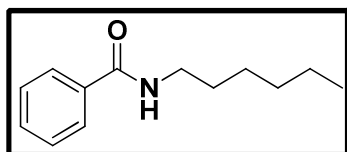

Colorless liquid.

**<sup>1</sup>H NMR (300 MHz, CDCl<sub>3</sub>, TMS)** δ/ppm: 7.78 (d, *J* = 7.2 Hz, 2H), 7.49–7.36 (m, 3H), 6.47 (br s, 1H, NH), 3.45–3.38 (m, 2H), 1.61–1.54 (m, 2H), 1.31 (br s, 6H), 0.88 (t, *J* = 6.3 Hz, 3H).

**<sup>13</sup>C NMR (75 MHz, CDCl<sub>3</sub>, TMS)** δ/ppm: 167.5, 134.8, 131.1, 128.4, 126.8, 40.0, 31.4, 29.5, 26.6, 22.5, 13.9.

**IR (KBr Disc,  $\bar{\nu}$ /Cm<sup>-1</sup>):** 3321, 2929, 2857, 1632, 1578, 1541, 1491, 1310, 695.

28. **N-Benzylnicotinamide (3ad)**<sup>25</sup>:

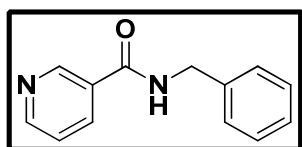

Pale yellow solid; m.p.: 72–73 °C.

**<sup>1</sup>H NMR (300 MHz, CDCl<sub>3</sub>, TMS)** δ/ppm: 8.93 (br s, 1H), 8.61 (br s, 1H), 8.12 (br s, 1H), 7.32–7.31 (br s, 6H), 4.61 (s, 2H).

**<sup>13</sup>C NMR (75 MHz, CDCl<sub>3</sub>, TMS)** δ/ppm: 165.5, 151.9, 147.8, 137.7, 135.3, 130.0, 128.7, 127.8, 127.6, 123.5, 44.0.

29. **2-Benzylisoindoline-1,3-dione (3ae)**<sup>26</sup>:

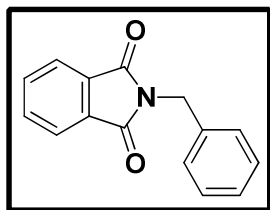

Colorless crystals; m.p.: 116–117 °C.

$^1\text{H NMR}$  (300 MHz,  $\text{CDCl}_3$ , TMS)  $\delta$ /ppm: 7.85–7.81 (m, 2H), 7.71–7.67 (m, 2H), 7.44–7.41 (m, 2H), 7.33–7.23 (m, 3H), 4.84 (s, 2H).

$^{13}\text{C NMR}$  (75 MHz,  $\text{CDCl}_3$ , TMS)  $\delta$ /ppm: 168.0, 136.3, 133.9, 132.1, 128.6, 128.5, 127.7, 123.3, 41.5.

IR (KBr Disc,  $\bar{\nu}/\text{Cm}^{-1}$ ): 3459, 3086, 3060, 3035, 2947, 2852, 1775, 1765, 1715, 1611, 1603, 1583, 1491, 1466, 1391, 1331, 1298, 1276, 1184, 1101, 792, 763.

30. 2-Cyclohexylisoindoline-1,3-dione (3af)<sup>27</sup>:

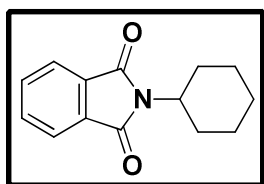

Colorless solid; m.p.: 169–171 °C.

$^1\text{H NMR}$  (300 MHz,  $\text{CDCl}_3$ , TMS)  $\delta$ /ppm: 7.82–7.79 (dd,  $J = 3.3$  Hz,  $J = 3$  Hz, 2H), 7.70–7.67 (dd,  $J = 3$  Hz,  $J = 3.3$  Hz, 2H), 4.15–4.06 (m, 1H), 2.26–2.14 (m, 2H), 1.89–1.71 (m, 5H), 1.44–1.25 (m, 3H).

$^{13}\text{C NMR}$  (75 MHz,  $\text{CDCl}_3$ , TMS)  $\delta$ /ppm: 168.4, 133.6, 132.0, 122.9, 50.8, 29.8, 26.0, 25.1.

31. 2-Hexylisoindoline-1,3-dione (3ag)<sup>28</sup>:

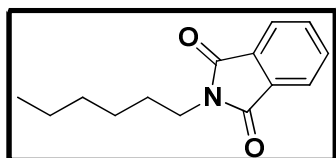

Colorless liquid.



$^1\text{H NMR}$  (300 MHz,  $\text{CDCl}_3$ , TMS)  $\delta$ /ppm: 7.84–7.81 (m, 2H), 7.72–7.69 (m, 2H), 3.67 (t,  $J = 7.5$  Hz, 2H), 1.69–1.65 (m, 2H), 1.31 (br s, 6H), 0.89–0.85 (m, 3H).

$^{13}\text{C NMR}$  (75 MHz,  $\text{CDCl}_3$ , TMS)  $\delta$ /ppm: 168.1, 133.6, 132.0, 122.9, 37.8, 31.2, 28.3, 26.3, 22.3, 13.8.

32. 2-Cyclopropylisoindoline-1,3-dione (**3ah**)<sup>29</sup>:

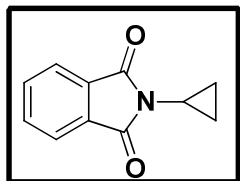

White solid; m.p.: 134–136 °C.

$^1\text{H NMR}$  ( $\text{CDCl}_3$ , 300 MHz, TMS)  $\delta$ /ppm: 7.83–7.80 (m, 2H), 7.72–7.69 (m, 2H), 2.75–2.68 (m, 1H), 1.04–1.01 (m, 4H).

$^{13}\text{C NMR}$  ( $\text{CDCl}_3$ , 75 MHz, TMS)  $\delta$ /ppm: 168.8, 133.9, 131.7, 123.0, 20.8, 5.1.

IR (KBr Disc,  $\bar{\nu}/\text{Cm}^{-1}$ ): 3026, 1767, 1713, 1699, 1610, 1463, 1402, 1140, 946, 699.

33. *N*-*tert*-Butylphthalimide (**3ai**)<sup>30</sup>:

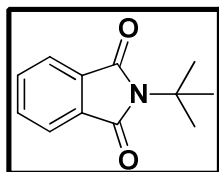

White solid; m.p.: 204–205 °C.

$^1\text{H NMR}$  (300 MHz,  $\text{CDCl}_3$ , TMS)  $\delta$ /ppm: 7.76 (br s, 2H), 7.68 (br s, 2H), 1.70/1.64 (s, 9H).

$^{13}\text{C NMR}$  (75 MHz,  $\text{CDCl}_3$ , TMS)  $\delta$ /ppm: 169.5, 133.6, 132.1, 122.5, 57.8, 29.1.

34. 2-(Phenethyl)isoindole-1,3-dione (**3aj**)<sup>31</sup>:

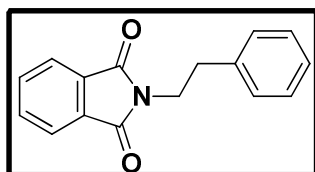

Colorless solid; m.p.: 130 °C.

<sup>1</sup>H NMR (300 MHz, CDCl<sub>3</sub>, TMS) δ/ppm: 7.84–7.81 (m, 2H), 7.71–7.68 (m, 2H), 7.26 (br s, 5H), 3.92 (t, *J* = 7.8 Hz, 2H), 2.99 (t, *J* = 7.2 Hz, 2H).

<sup>13</sup>C NMR (75 MHz, CDCl<sub>3</sub>, TMS) δ/ppm: 168.1, 138.0, 133.9, 132.0, 128.8, 128.5, 126.6, 123.2, 39.2, 34.6.

IR (KBr Disc,  $\bar{\nu}/\text{Cm}^{-1}$ ): 3020, 1770, 1710, 1614, 1496, 1429, 1396, 1359, 1083, 989, 869, 755, 633.

## V. References:

1. M. Suchỳ, A. A. H. Elmehriki and R. H. E. Hudson, *Org. Lett.*, 2011, **13**, 3952.
2. G.-L. Li, K. K.-Y. Kung and M.-K. Wong, *Chem. Commun.*, 2012, **48**, 4112.
3. T. B. Nguyen, J. Sorres, M. Q. Tran, L. Ermolenko and A. Al-Mourabit, *Org. Lett.*, 2012, **14**, 3202.
4. G. B. Villeneuve and T. H. Chan, *Tetrahedron Lett.*, 1997, **38**, 6489.
5. L. Di Nunno and A. Scilimati, *Tetrahedron*, 1986, **42**, 3913.
6. A. Ghorbani-Choghamarani and Z. Akbaripanah, *Chinese Chem. Lett.*, 2012, **23**, 450.
7. H. Tumma, Nagaraju N and K. V. Reddy, *J. Mol. Cat. A: Chem.*, 2009, **310**, 121.
8. M. Hosseini-Sarvari and H. Sharghi, *J. Org. Chem.*, 2006, **71**, 6652.
9. J.-G. Kim and D.-O. Jang, *Synlett*, 2010, **8**, 1231.
10. S. Ko, H. Han and S. Chang, *Org. Lett.*, 2003, **5**, 2687.
11. M. C. Elliott and E. Williams, *Org. Biomol. Chem.*, 2003, **1**, 3038.
12. J. E. Taylor, M. D. Jones, J. M. J. Williams and S. D. Bull, *J. Org. Chem.*, 2012, **77**, 2808.
13. (a) D. R. Stuart, M. Bertrand-Laperle, K. M. N. Burgess and K. Fagnou, *J. Am. Chem. Soc.*, 2008, **130**, 16474; (b) M. Li, L. Hu, X. Cao, H. Hong, J. Lu and H. Gu, *Chem. -Eur. J.*, 2001, **17**, 2763.
14. B. T. Gowda, K. M. Usha and K. L. Z. Jayalakshmi, *Naturforsch., A: Phys. Sci.*, 2003, **58**, 801.
15. S. R. Narahari, B. R. Reguri and K. Mukkanti, *Tetrahedron Lett.*, 2011, **52**, 4888.

16. A. R. Katritzky, C. Cai and S. K. Singh, *J. Org. Chem.*, 2006, **71**, 3375.
17. (a) C. J. Bennett, S. T. Caldwell, D. B. McPhail, P. C. Morrice, G. G. Duthie and R. C. Hartley, *Bioorg. Med. Chem.*, 2004, **12**, 2079; (b) B. P. Fors, P. Krattiger, E. Strieter and S. L. Buchwald, *Org. Lett.*, 2008, **10**, 3505.
18. B. S. Kim, C. Jang, D. J. Lee and S. W. Youn, *Chem. -Asian J.*, 2010, **5**, 2336.
19. (a) S. Xun, G. LeClair, J. D. Zhang, X. Chen, J. P. Gao and Z. Y. Wang, *Org. Lett.*, 2006, **8**, 1697; (b) K. Hisler, A. G. J. Commeureuc, S.-Z. Zhou and J. A. Murphy, *Tetrahedron Lett.*, 2009, **50**, 3290.
20. L. U. Nordstrom, H. Vogt and R. Madsen, *J. Am. Chem. Soc.*, 2008, **130**, 17672.
21. J. Pan, N. O. Devarie-Baez and M. Xian, *Org. Lett.*, 2011, **13**, 1092.
22. S. Das, B. Join, K. Junge and M. Beller, *Chem. Commun.*, 2012, **48**, 2683.
23. N. D. Kokare, R. R. Nagawade, V. P. Rane and D. B. Shinde, *Synthesis*, 2007, 766.
24. T. Ohshima, T. Iwasaki, Y. Maegawa, A. Yoshiyama and K. Mashima, *J. Am. Chem. Soc.*, 2008, **130**, 2944.
25. T. H. Graham, W. Liu and D.-M. Shen, *Org. Lett.*, 2011, **13**, 6232.
26. H. Cao and H. Alper, *Org. Lett.*, 2010, **12**, 4126.
27. D. N. Sawant, Y. S. Wagh, K. D. Bhatte and B. M. Bhanage, *Eur. J. Org. Chem.*, 2011, 6719.
28. M.-L. Wang and W.-H. Chen, *React. Kinet. Catal. Lett.*, 2006, **89**, 377.
29. S. Bénard, L. Neuville and J. Zhu, *J. Org. Chem.*, 2008, **73**, 6441.
30. D. Marosvölgyi-Haskó, A. Petz, A. Takács and L. Kollér, *Tetrahedron*, 2011, **67**, 9122.
31. Y.-P. Li, F.-X. Ning, M.-B. Yang, Y.-C. Li, M.-H. Nie, T.-M. Ou, J.-H. Tan, S.-L. Huang, D. Li, L.-Q. Gu and Z.-S. Huang, *Eur. J. Med. Chem.*, 2011, **46**, 1572.

## VI. Copies of $^1\text{H}$ and $^{13}\text{C}$ Spectra of Products

C:\K.N. Singh,,I.T\TA\_1H.als  
TA 1H Mr.A.Bharat Kumar

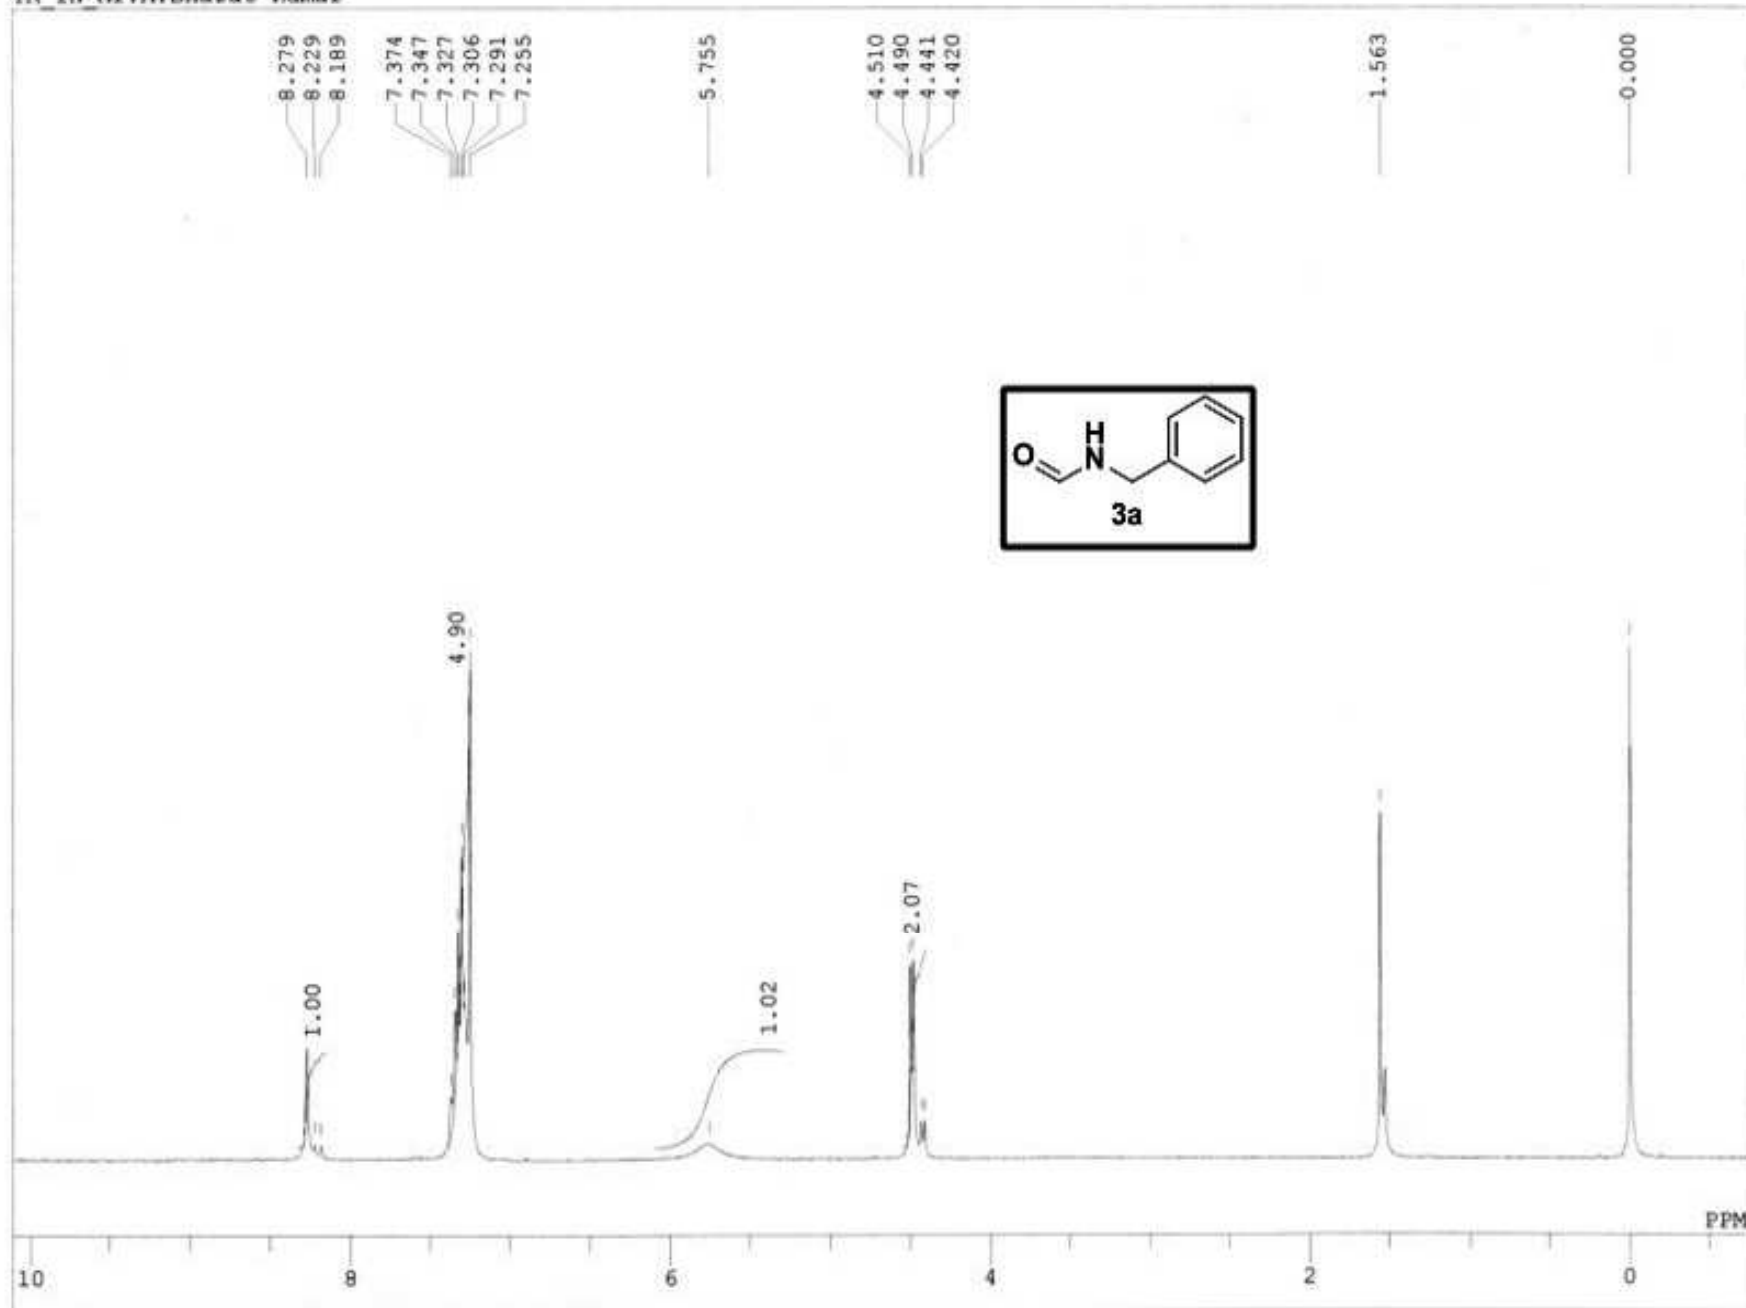

JEOL AL300 FTNMR  
CHEMISTRY DEPARTMENT  
Banaras Hindu University  
VARANASI-221005

Operator : Nagendra Kuma  
Shishir Singh

DFILE C:\K.N. Singh,,I.'  
COMNT TA\_1H\_Mr.A.Bharat  
DATIM Tue Jun 12 13:00:  
OBNUC 1H  
EXMOD NON  
OBFRQ 300.40 MHz  
OBSET 130.00 KHz  
OBFIN 1150.0 Hz  
POINT 32768  
FREQU 9505.7 Hz  
SCANS 32  
ACQTM 3.447 sec  
PD 1.547 sec  
PW1 5.2 us  
IRNUC 1H  
CTEMP 22.4 c  
SLVNT CDCL3  
EXREF 0.00 ppm  
BF 1.20 Hz  
RGAIN 23

NBA\_13C\_Mr.Rajeshwer

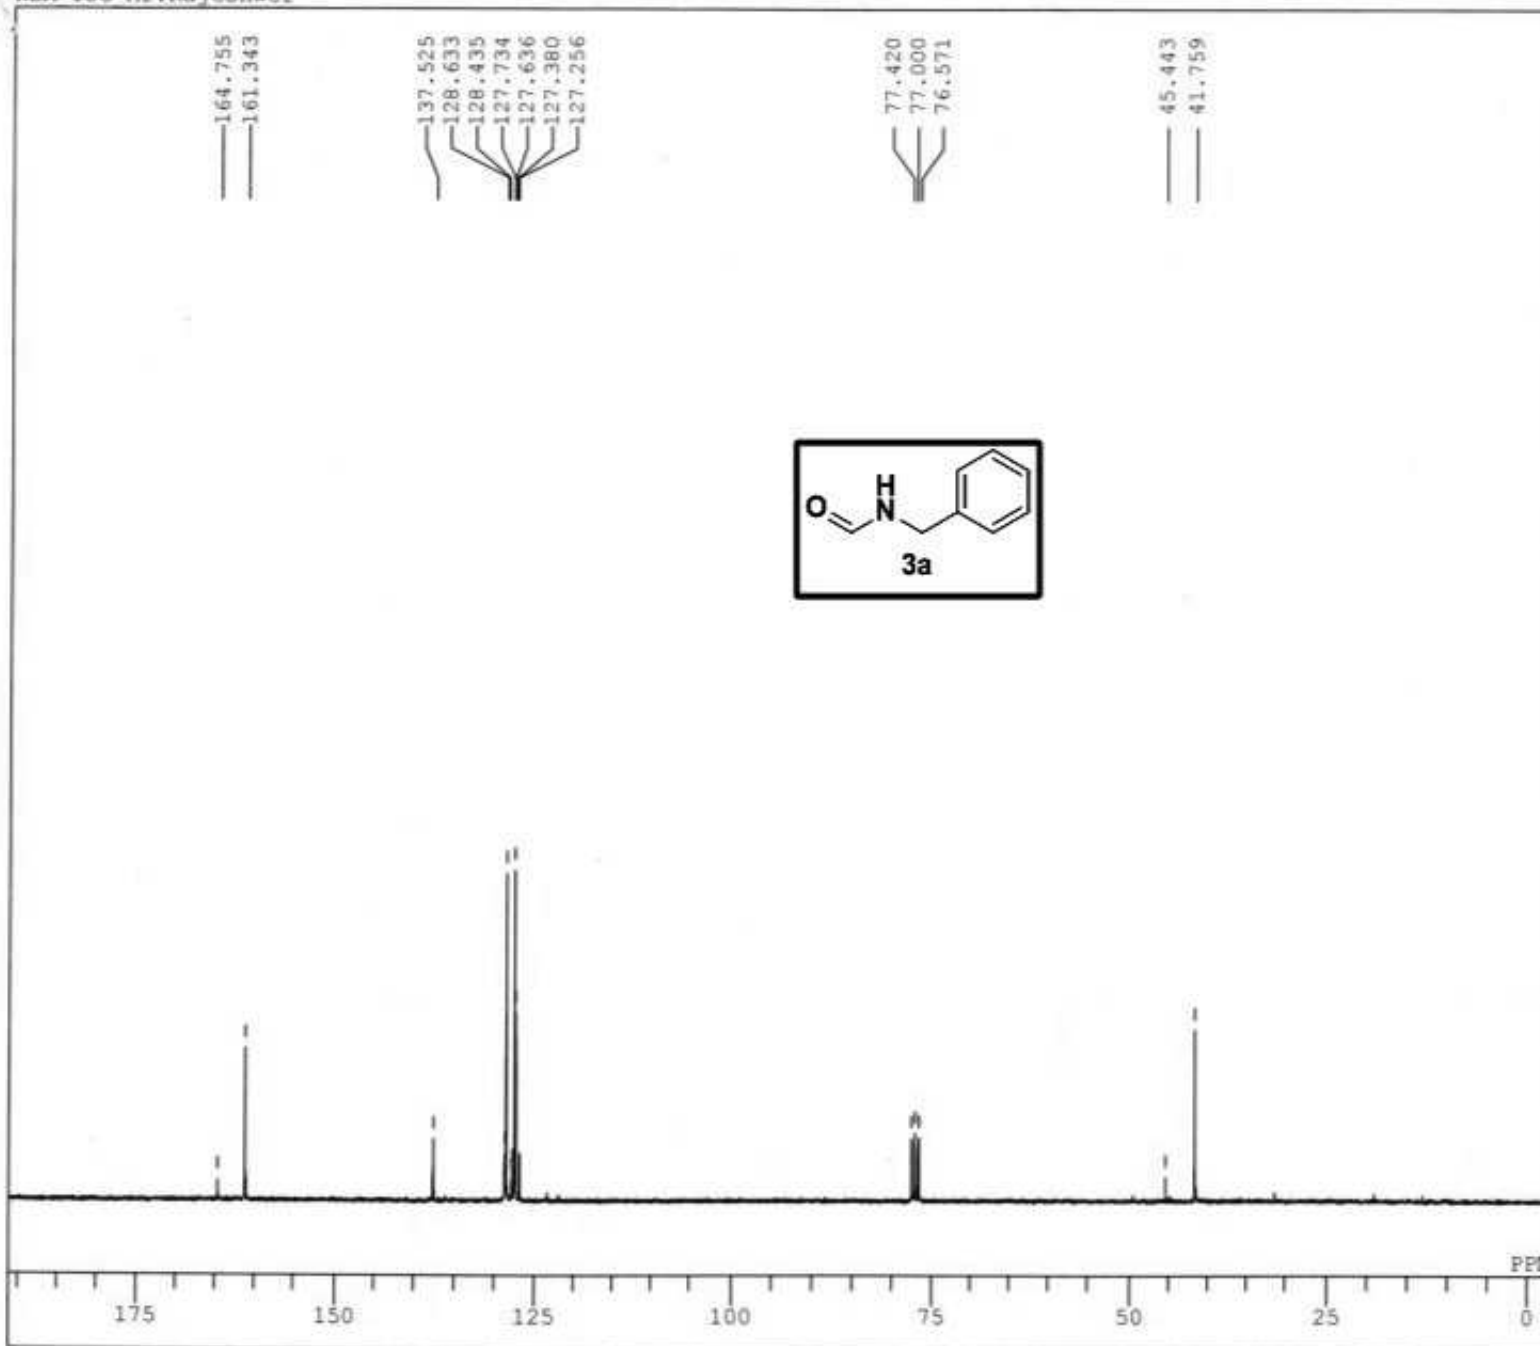

JEOL AL300 FTNMR  
CHEMISTRY DEPARTMENT  
Banaras Hindu University,  
VARANASI-221005

Operator : Nagendra Kumar  
Shishir Singh

DFILE C:\K.N. Singh,,I.T\NBA\_13C.e  
COMNT NBA\_13C\_Mr.Rajeshwer  
DATIM Tue Jun 26 15:16:36 2012  
OBNUC 13C  
EXMOD BCM  
OBFRQ 75.45 MHz  
OBSET 127.30 KHz  
OBFIN 44.7 Hz  
POINT 32768  
FREQU 20408.1 Hz  
SCANS 150  
ACQTM 1.606 sec  
PD 1.394 sec  
PW1 6.0 us  
IRNUC 1H  
CTEMP 22.6 c  
SLVNT CDCL3  
EXREF 77.00 ppm  
BF 1.20 Hz  
RGAIN 24

PIP 1H Mr. Rajeshwer

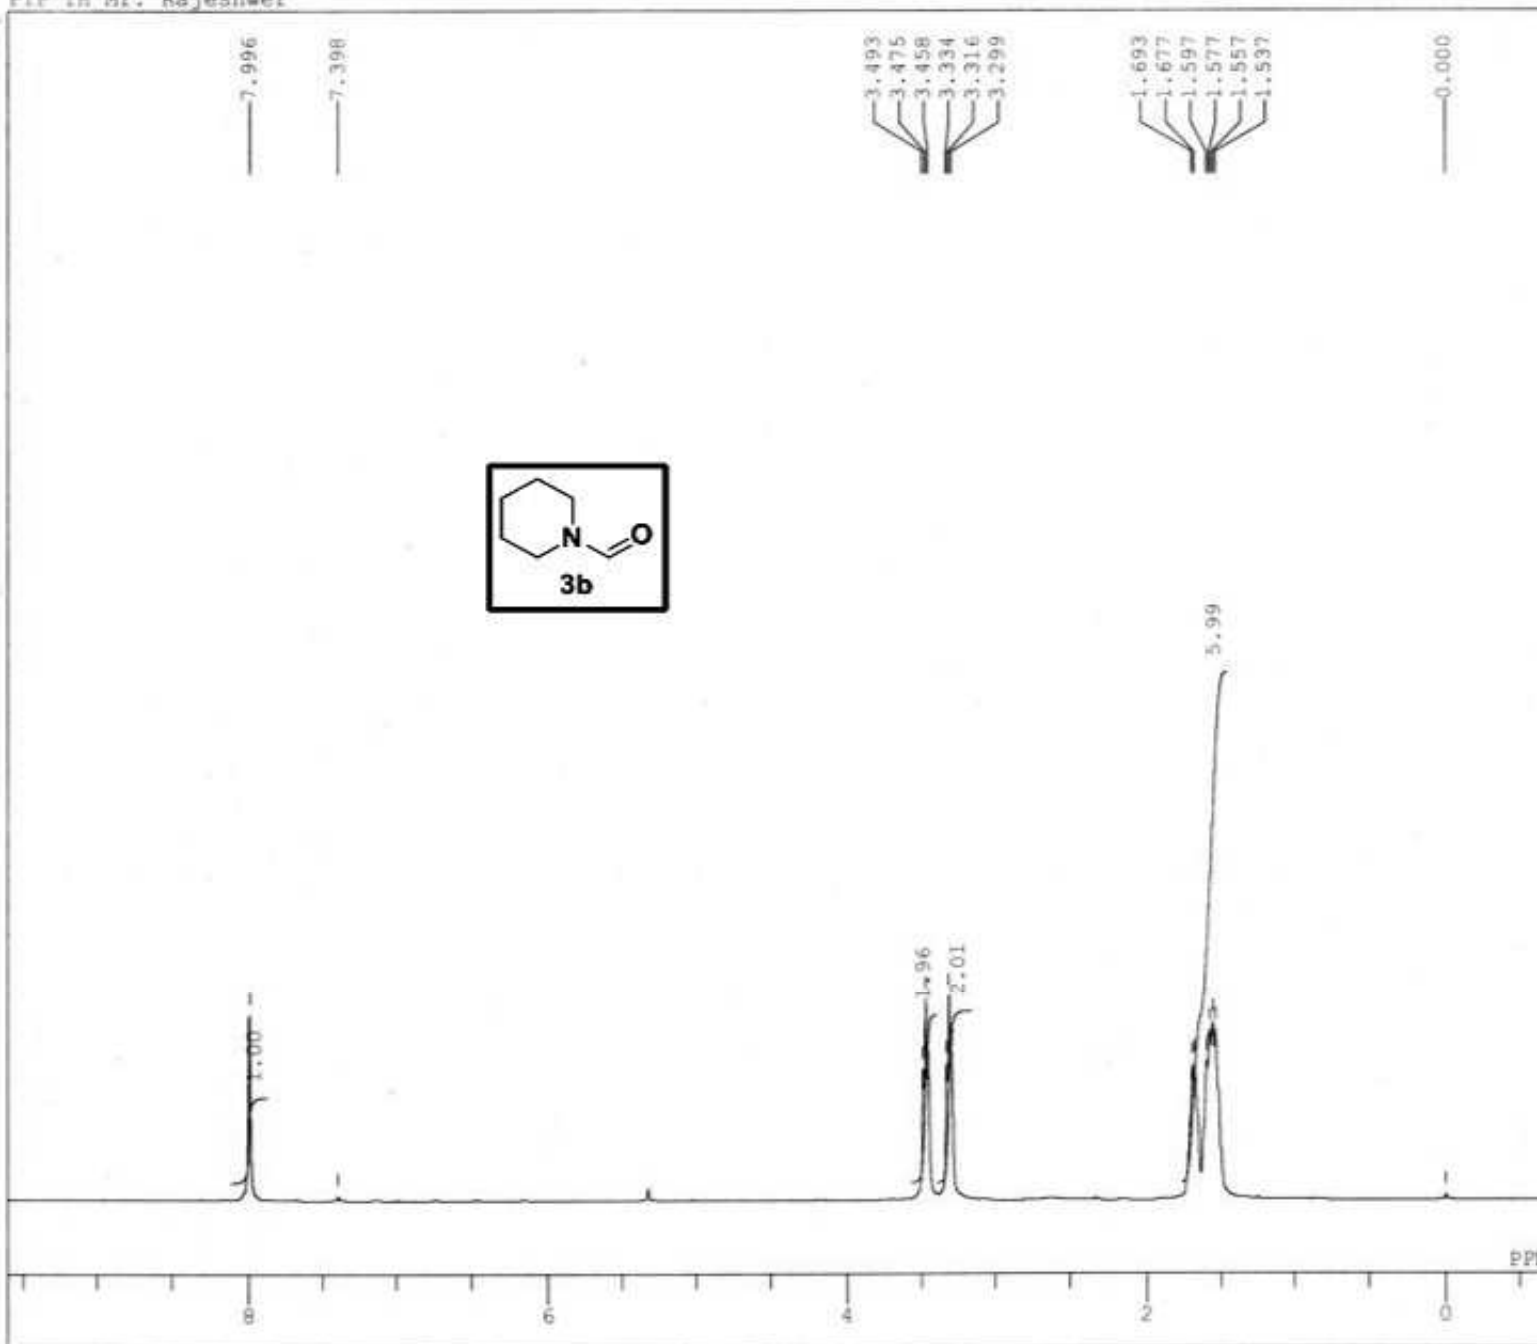

JEOL AL300 FTNMR  
CHEMISTRY DEPARTMENT  
Banaras Hindu University,  
VARANASI-221005

Operator : Nagendra Kumar  
Shishir Singh

DFILE C:\K.N. Singh,,I.T\PIP\_1H.a1  
COMNT PIP\_1H Mr. Rajeshwer  
DATIM Tue Jul 03 12:19:52 2012  
OBNUC 1H  
EXMOD NON  
OBFRQ 300.40 MHz  
OBSET 130.00 KHz  
OBFIN 1150.0 Hz  
POINT 32768  
FREQU 9505.7 Hz  
SCANS 108  
ACQTM 3.447 sec  
PD 1.547 sec  
PW1 5.2 us  
IRNUC 1H  
CTEMP 21.6 c  
SLVNT CDCL3  
EXREF 0.00 ppm  
BF 1.20 Hz  
RGAIN 8

PIP 13C Mr. Rajeshwer

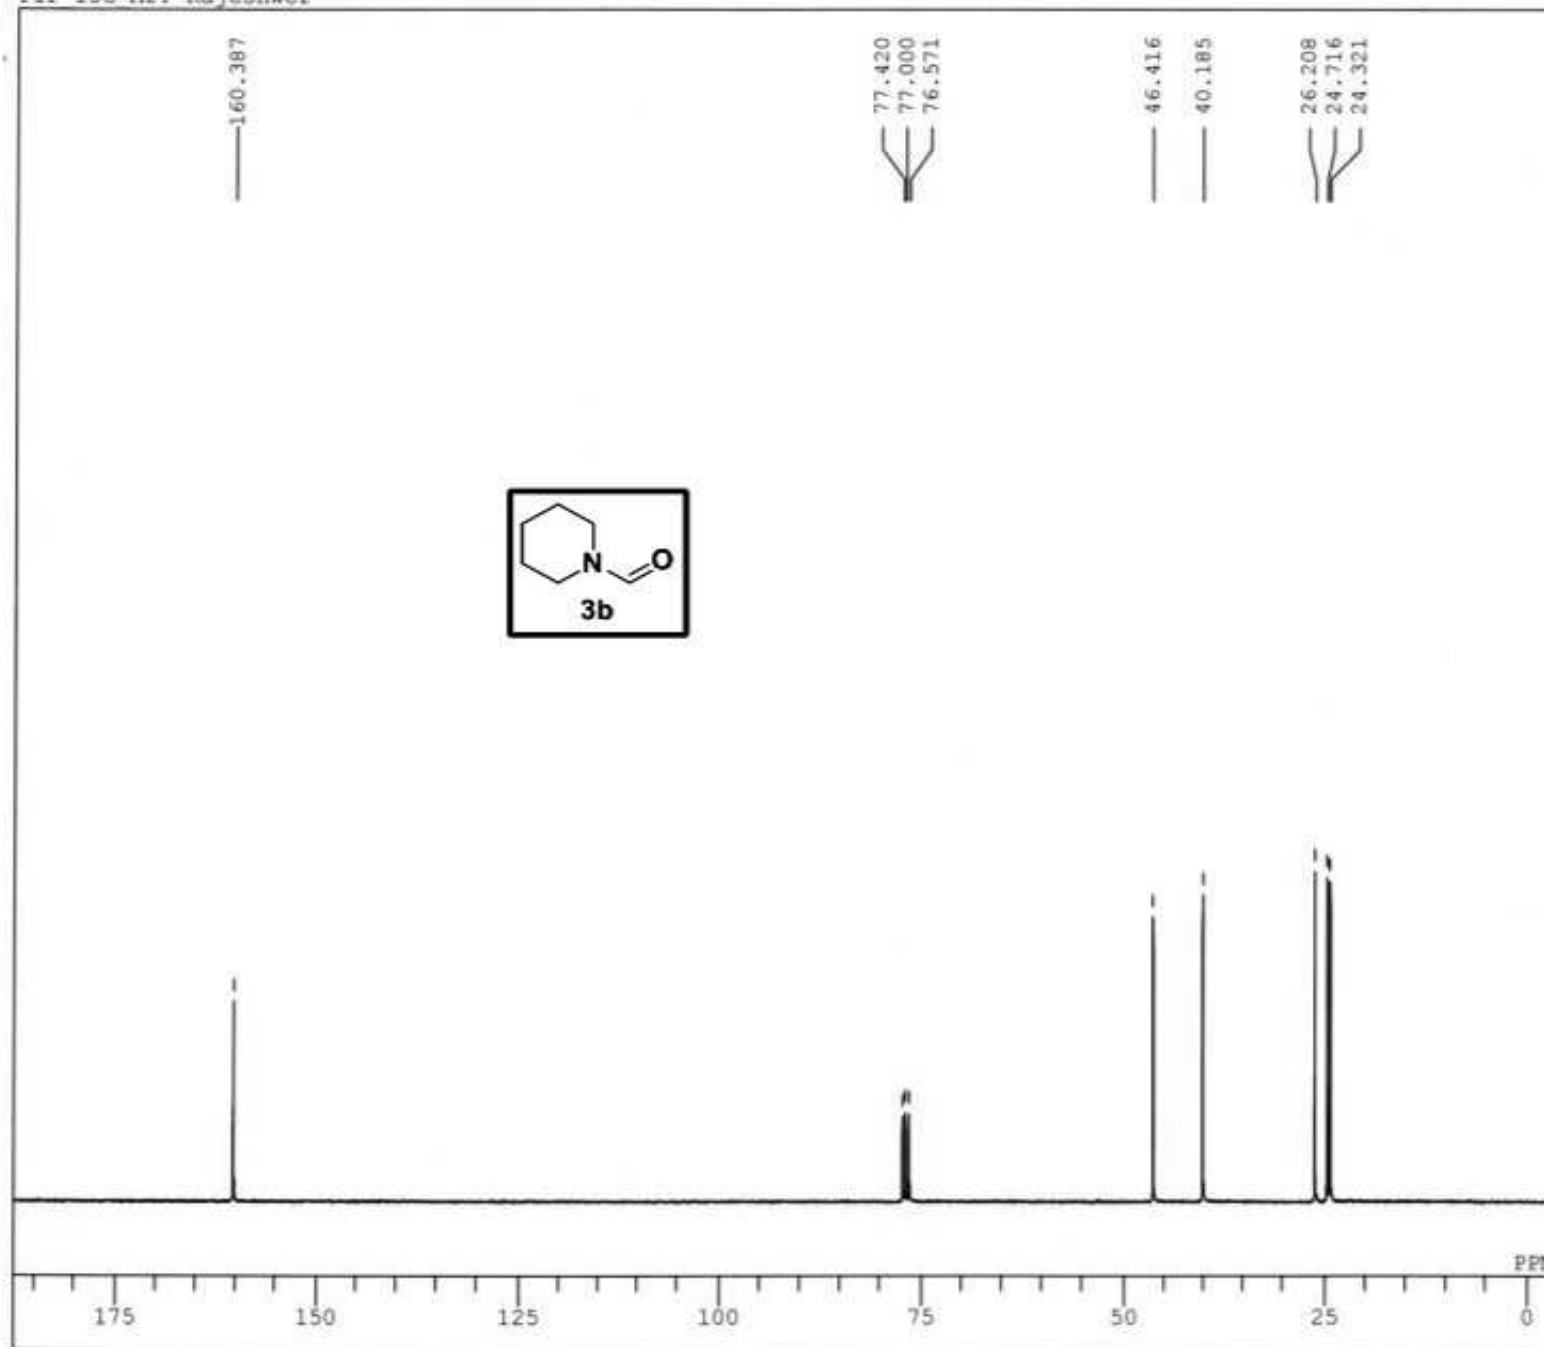

JEOL AL300 FTNMR  
CHEMISTRY DEPARTMENT  
Banaras Hindu University,  
VARANASI-221005

Operator : Nagendra Kumar  
Shishir Singh

DFILE C:\WINNMR98\COMMON\\_DEFAULT.  
COMNT PIP\_13C Mr. Rajeshwer  
DATIM Wed Jul 04 16:13:39 2012  
OBNUC 13C  
EXMOD BCM  
OBFRQ 75.45 MHz  
OBSET 127.30 KHz  
OBFIN 44.7 Hz  
POINT 32768  
FREQU 20408.1 Hz  
SCANS 775  
ACQTM 1.606 sec  
PD 1.394 sec  
FWL 6.0 us  
IRNUC 1H  
CTEMP 20.5 c  
SLVNT CDCL3  
EXREF 77.00 ppm  
BF 1.20 Hz  
RGAIN 24



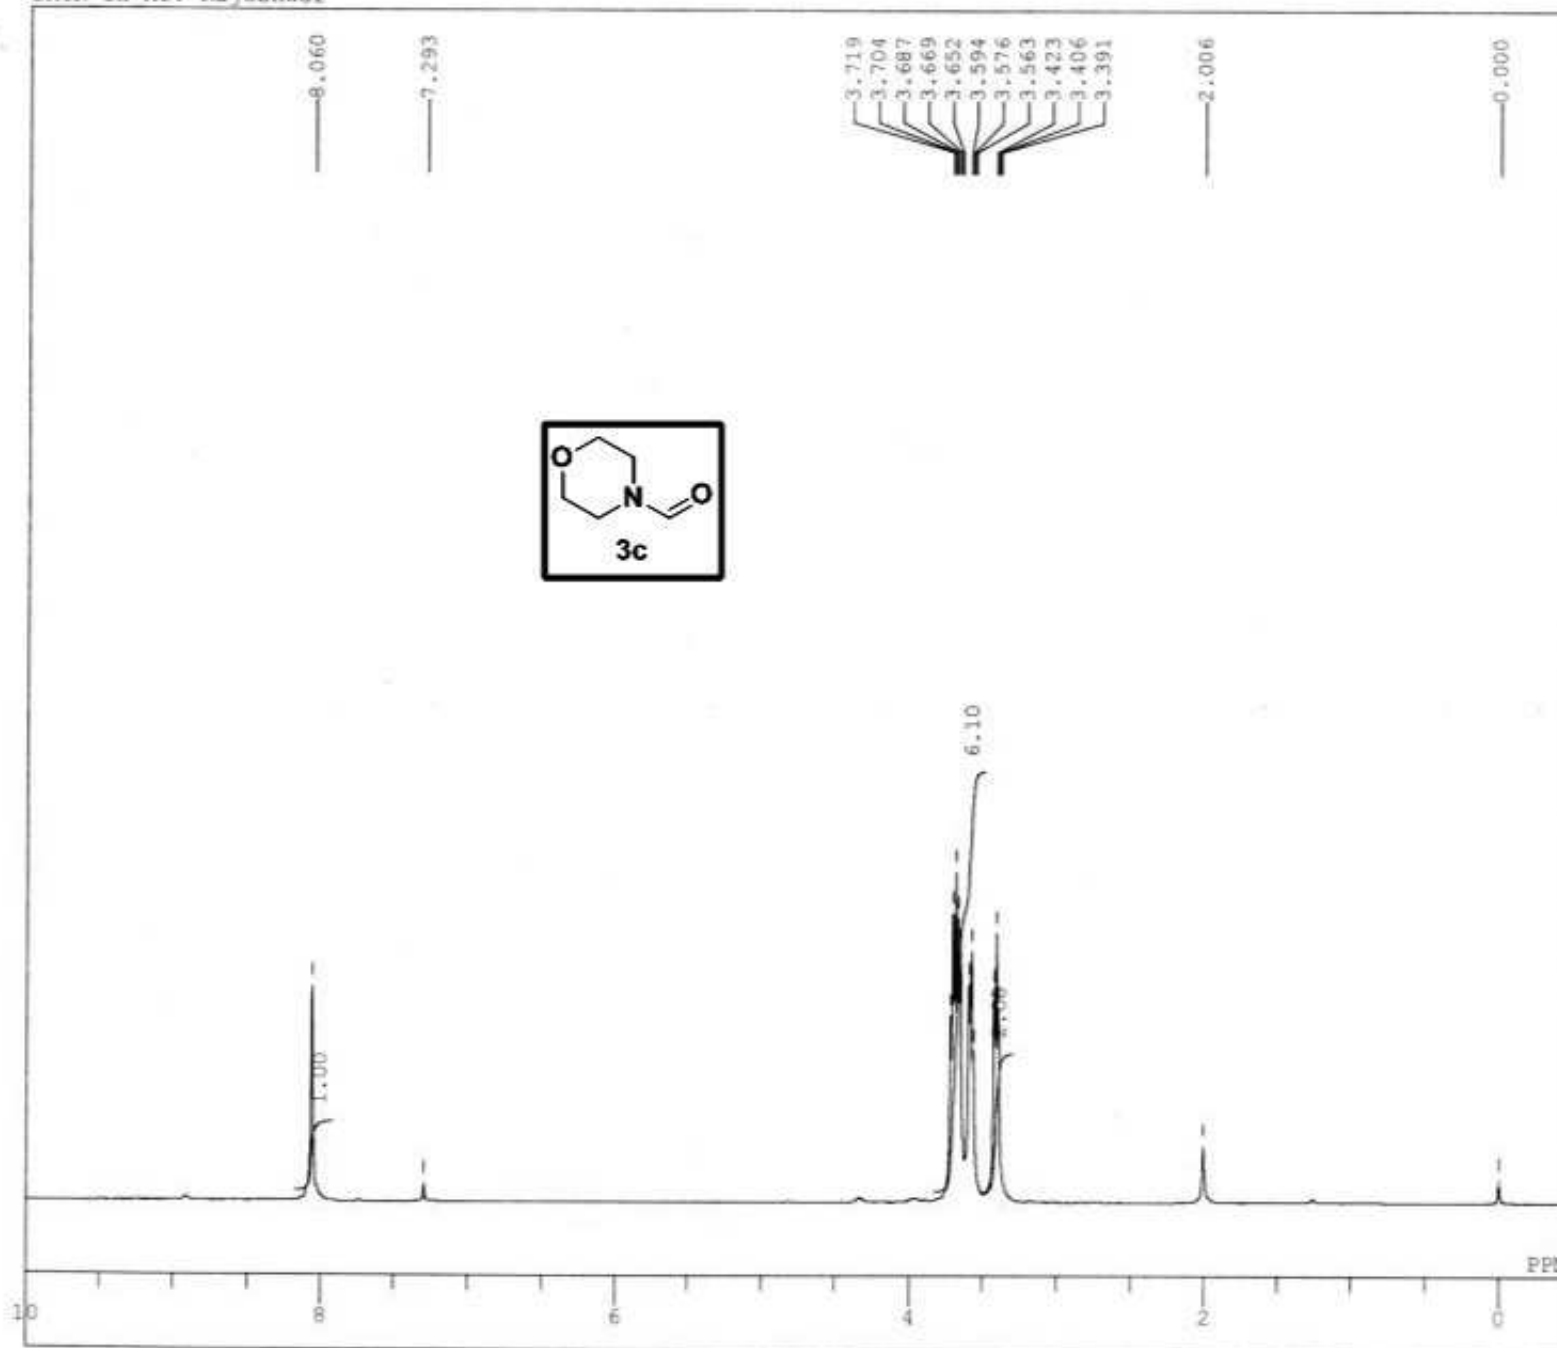

JEOL AL300 FTNMR  
CHEMISTRY DEPARTMENT  
Banaras Hindu University,  
VARANASI-221005

Operator : Nagendra Kumar  
Shishir Singh

DFILE C:\WINNMR98\COMMON\\_DEFAULT.  
COMNT BMOR 1H\_Mr. Rajeshwer  
DATIM Fri Sep 14 15:41:44 2012  
OBNUC 1H  
EXMOD NON  
OBFRQ 300.40 MHz  
OBSET 130.00 KHz  
OBFIN 1150.0 Hz  
POINT 32768  
FREQU 9505.7 Hz  
SCANS 16  
ACQTM 3.447 sec  
PD 1.547 sec  
PWI 5.2 us  
IRNUC 1H  
CTEMP 17.3 c  
SLVNT CDCL3  
EXREF 0.00 ppm  
BF 1.20 Hz  
RGAIN 12

BMOR 13C Mr. Rajeshwer

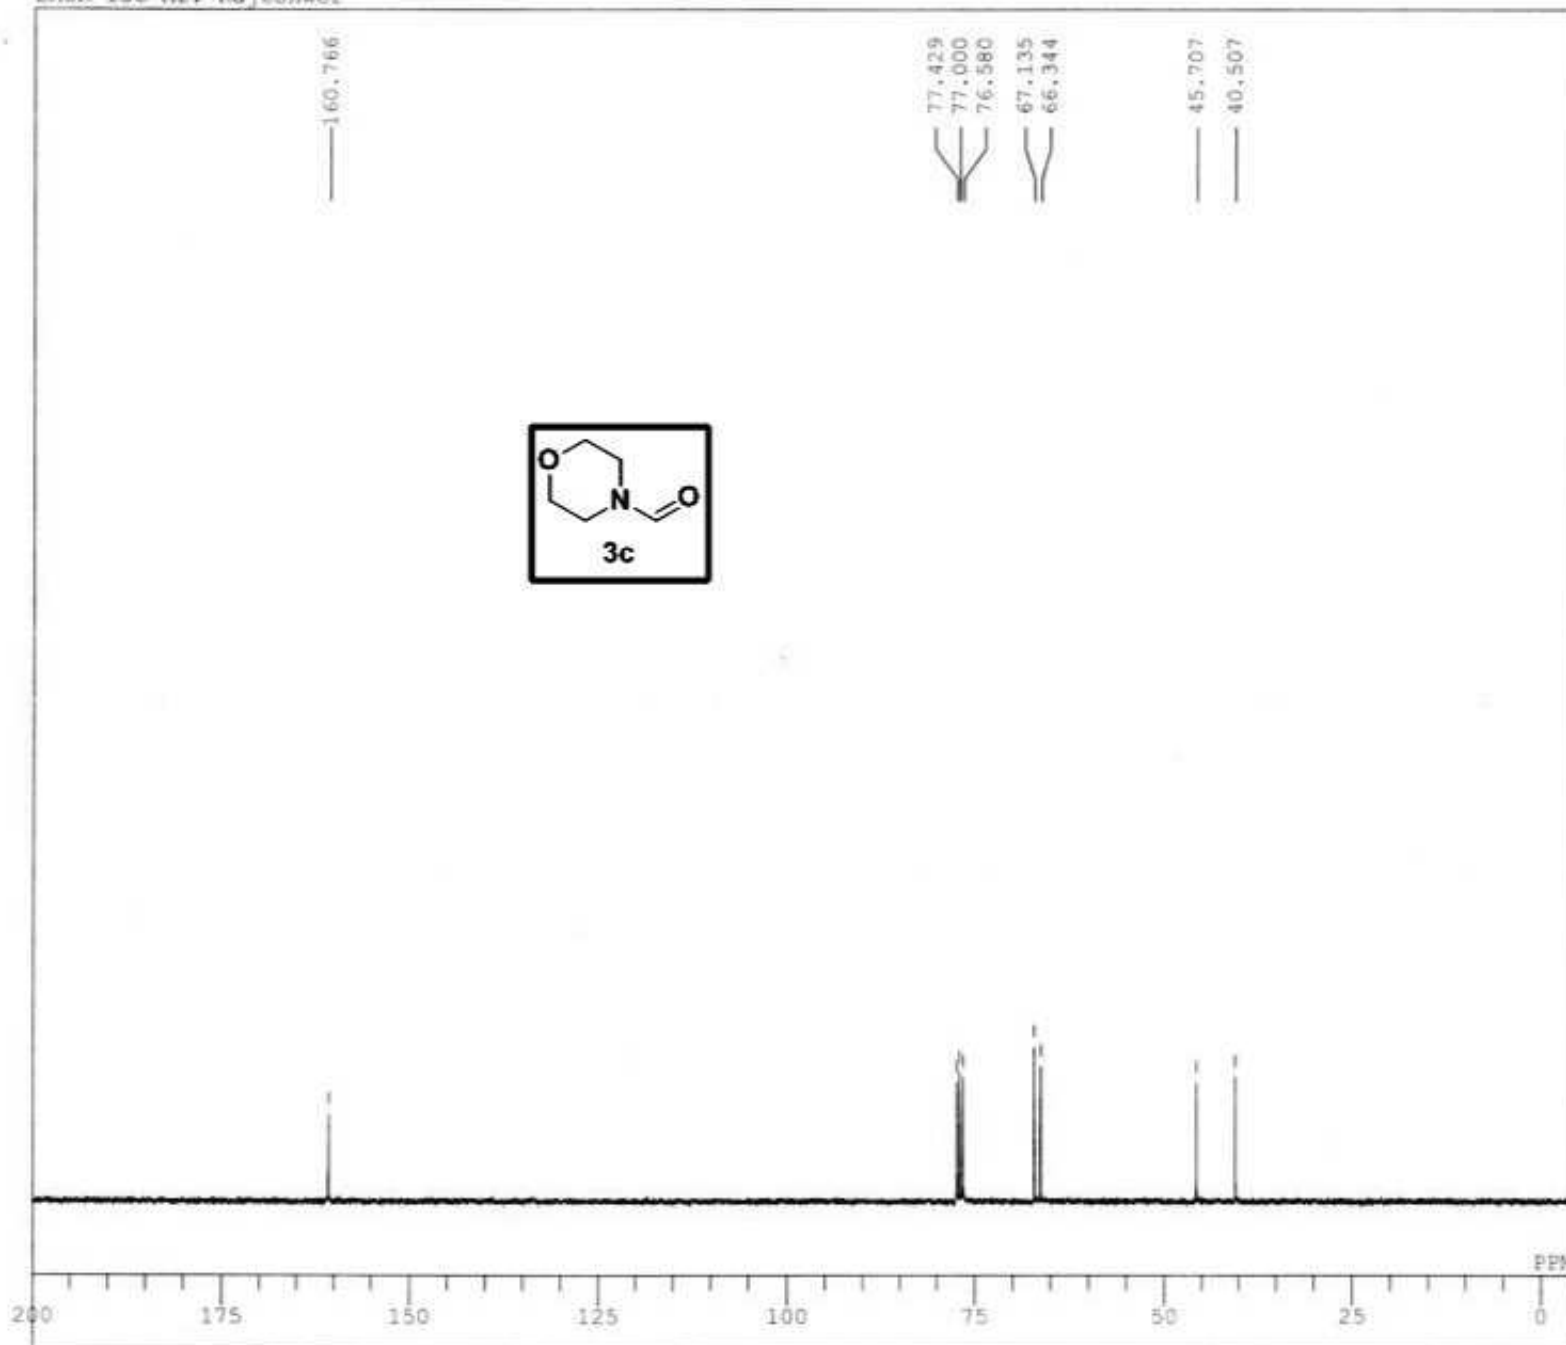

JEOL AL300 FTNMR  
CHEMISTRY DEPARTMENT  
Banaras Hindu University,  
VARANASI-221005

Operator : Nagendra Kumar  
Shishir Singh

DFILE C:\WINNMR98\COMMON\\_DEFAULT.  
COMNT BMOR 13C Mr. Rajeshwer  
DATIM Fri Sep 14 15:51:19 2012  
OBNUC 13C  
EXMOD BCM  
OBFRQ 75.45 MHz  
OBSET 127.30 KHz  
OBFIN 44.7 Hz  
POINT 32768  
FREQU 20408.1 Hz  
SCANS 150  
ACQTM 1.606 sec  
PD 1.394 sec  
PW1 6.0 us  
IRNUC 1H  
CTEMP 18.0 c  
SLVNT CDCL3  
EXREF 77.00 ppm  
BF 1.20 Hz  
RGAIN 25

PAN 1H Mr. Rajeshwer

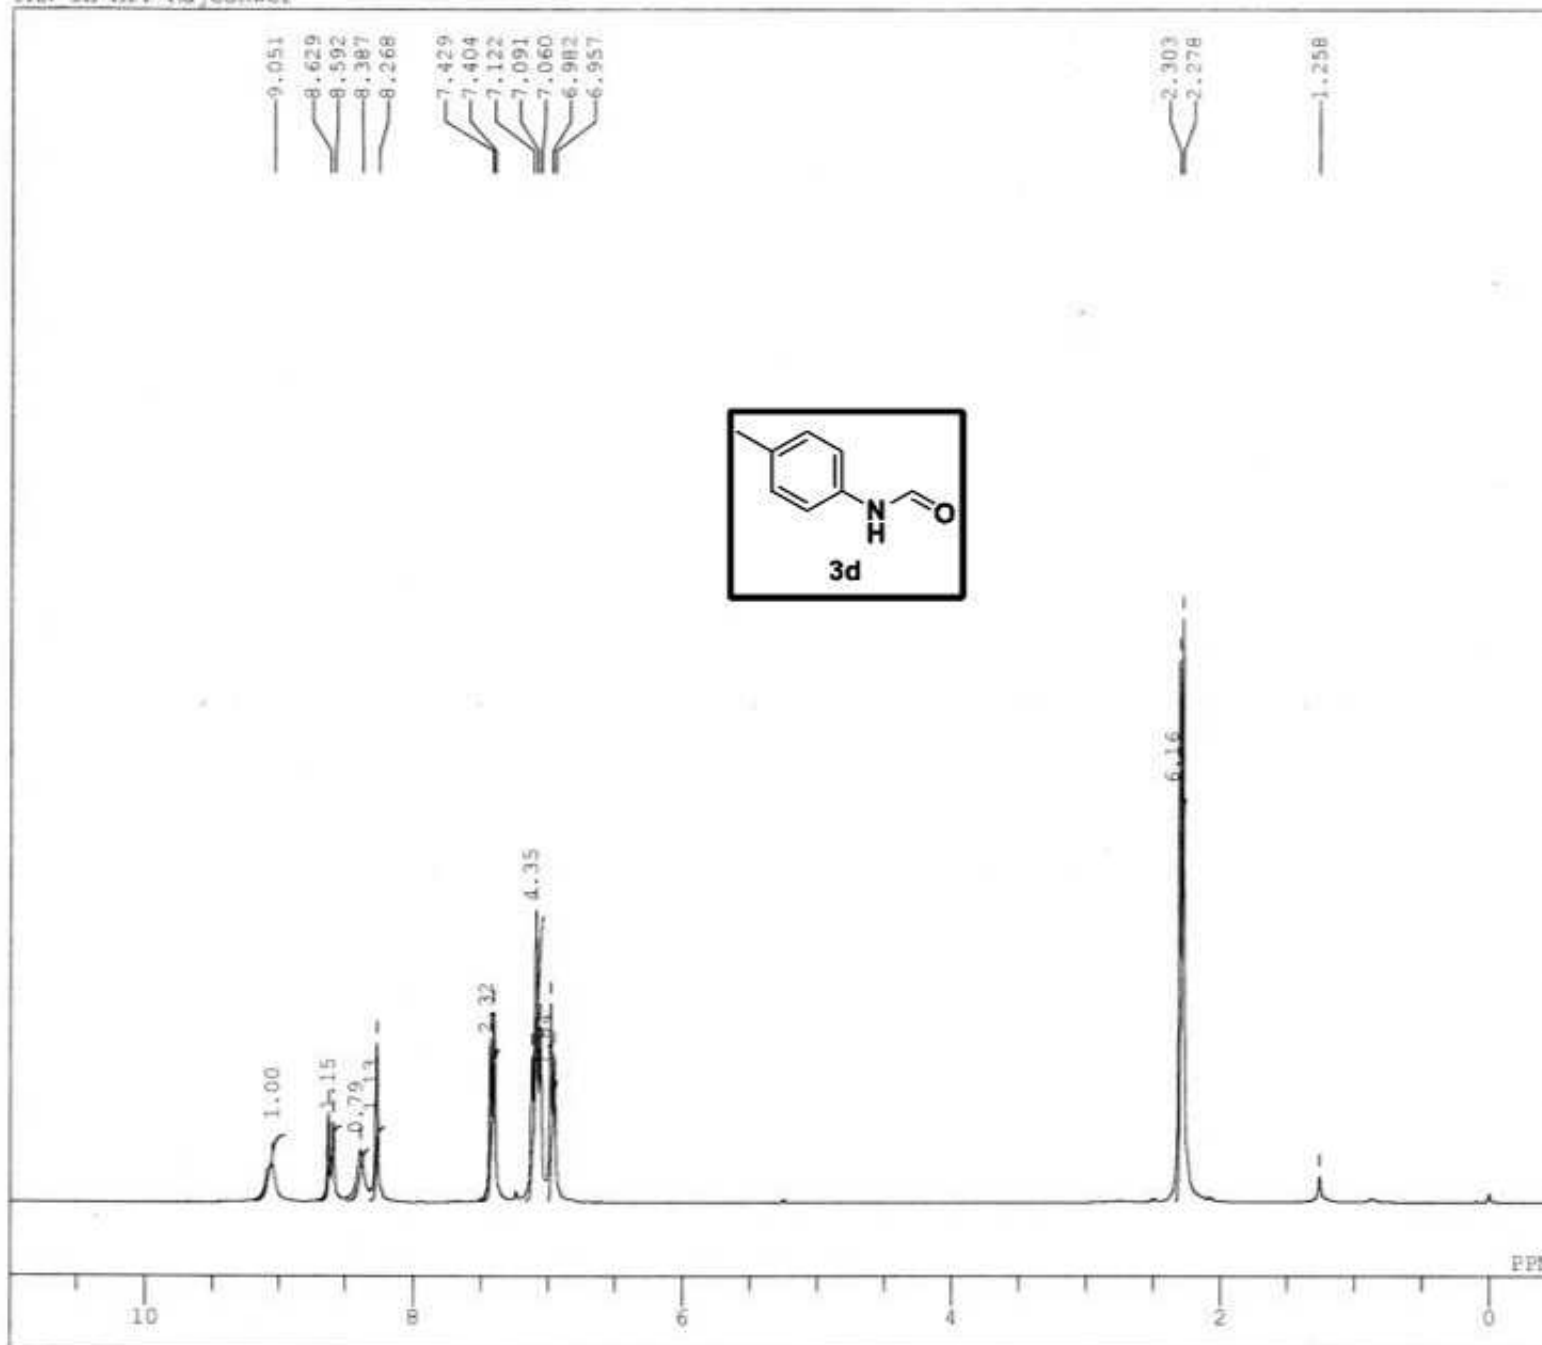

JEOL AL300 FTNMR  
CHEMISTRY DEPARTMENT  
Banaras Hindu University,  
VARANASI-221005

Operator : Nagendra Kumar  
Shishir Singh

DFILE C:\K.N. Singh,,I.T\PAN\_1H.a1  
COMNT PAN\_1H Mr. Rajeshwer  
DATIM Tue Jul 03 12:06:32 2012  
QBNUC 1H  
EXMOD NON  
OBFREQ 300.40 MHz  
OBSET 130.00 KHz  
OBFIN 1150.0 Hz  
POINT 32768  
FREQU 9505.7 Hz  
SCANS 38  
ACQTM 3.447 sec  
PD 1.547 sec  
PWI 5.2 us  
IRNUC 1H  
CTEMP 21.5 c  
SLVNT CDCL3  
EXREF 0.00 ppm  
BF 1.20 Hz  
RGAIN 11

PAN\_13C\_Mr. Rajeshwer

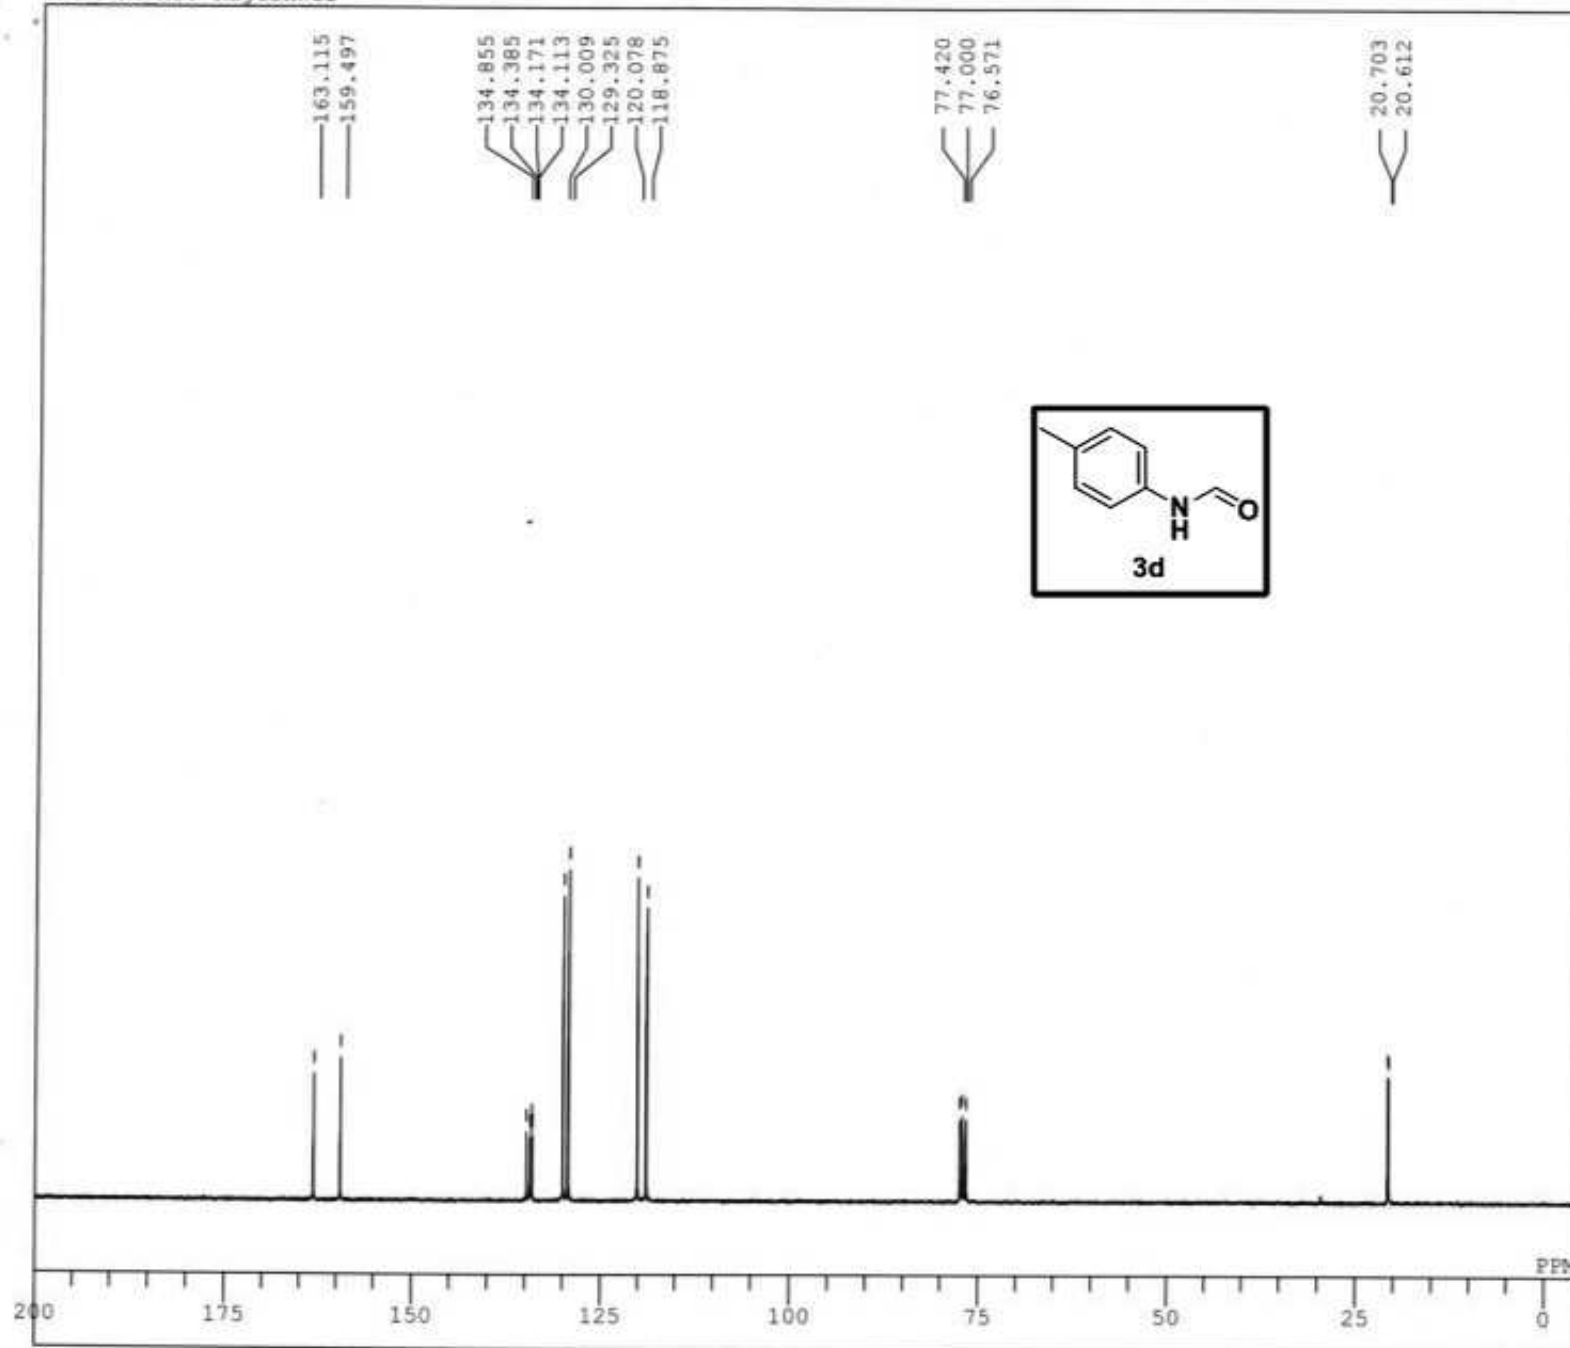

JEOL AL300 FTNMR  
CHEMISTRY DEPARTMENT  
Banaras Hindu University,  
VARANASI-221005

Operator : Nagendra Kumar  
Shishir Singh

DFILE C:\WINNMR98\COMMON\\_DEFAULT.  
COMNT PAN\_13C\_Mr. Rajeshwer  
DATIM Tue Jul 03 11:59:58 2012  
OBNUC 13C  
EXMOD BCM  
OBFRQ 75.45 MHz  
OBSET 127.30 KHz  
OBFIN 44.7 Hz  
POINT 32768  
FREQU 20408.1 Hz  
SCANS 406  
ACQTM 1.606 sec  
PD 1.394 sec  
PW1 6.0 us  
IRNUC 1H  
CTEMP 22.4 c  
SLVNT CDCL3  
EXREF 77.00 ppm  
BF 1.20 Hz  
RGAIN 25

C:\K.N. Singh,,I.T\OMe\_1H.als  
OMe 1H Mr. Rajeshwer

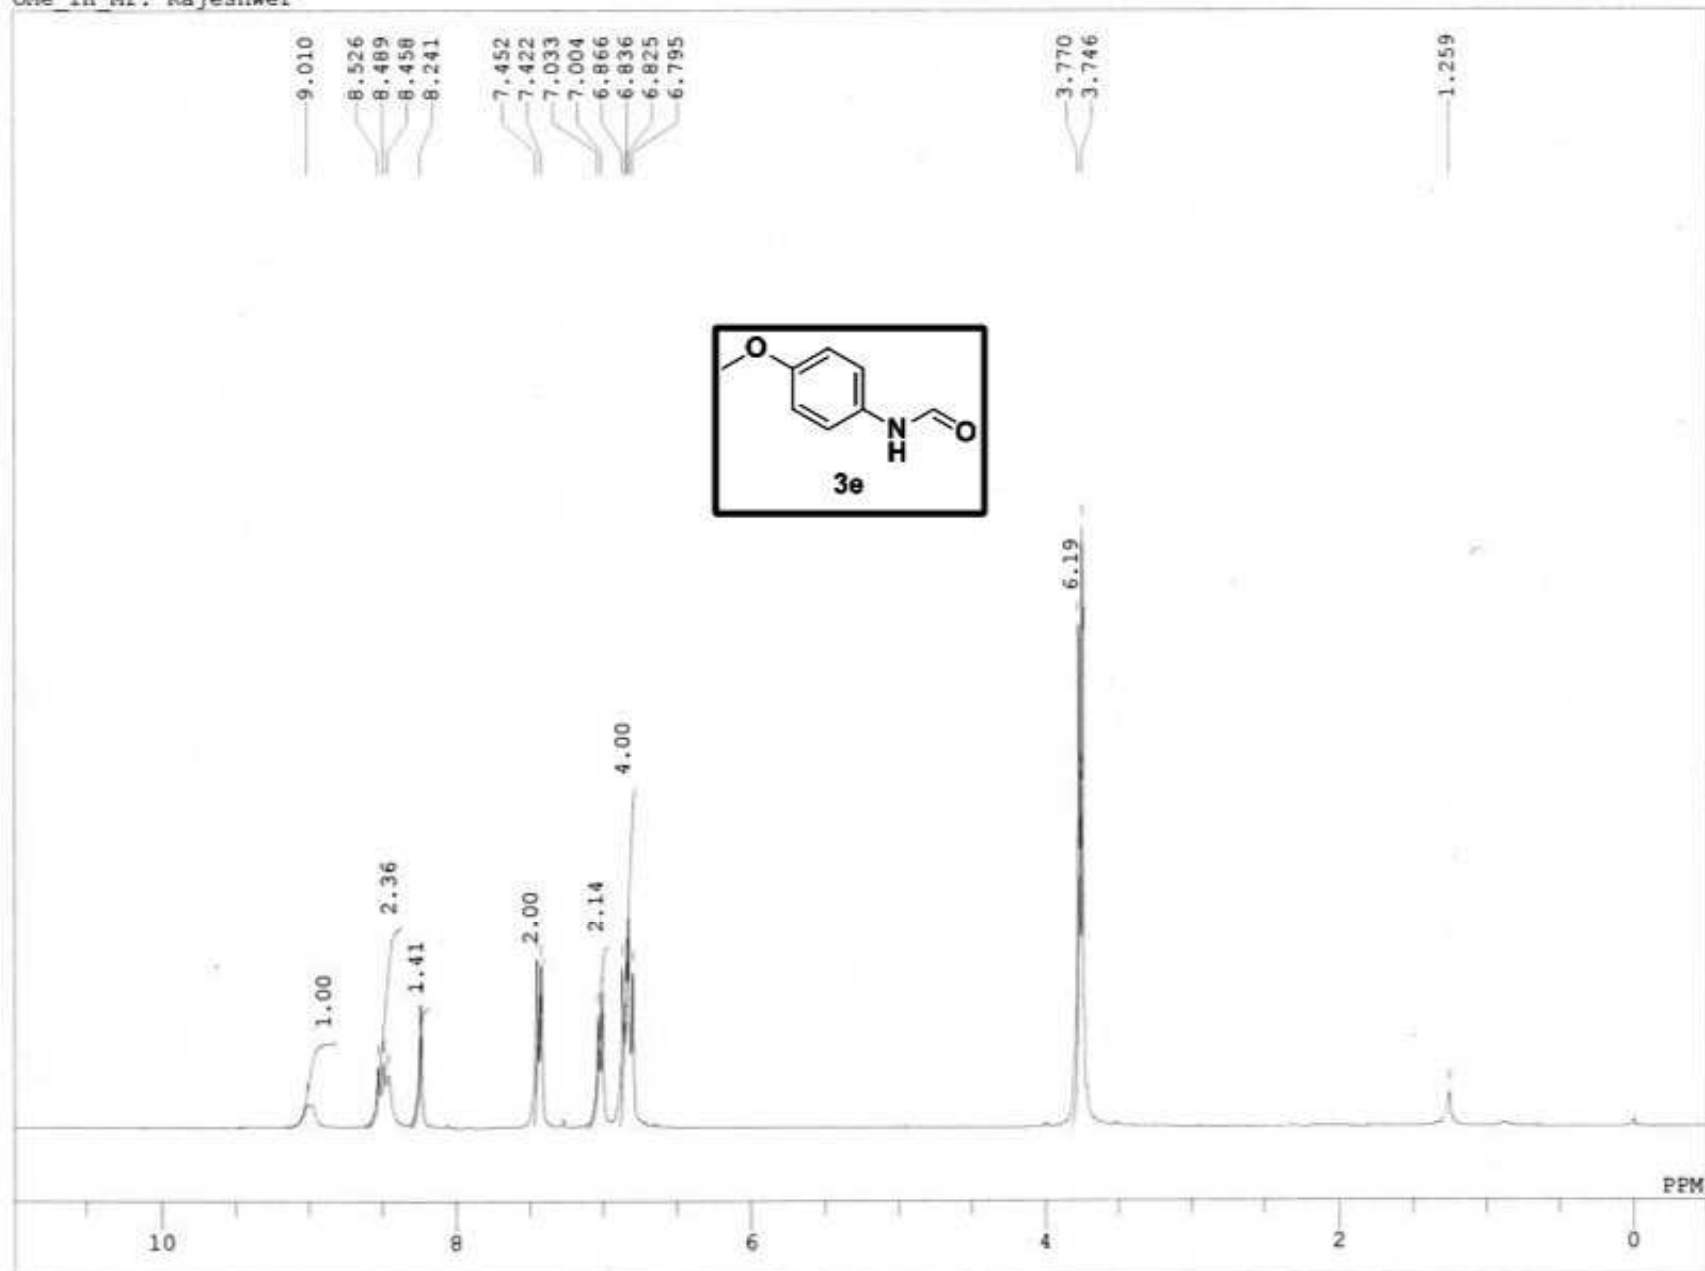

JEOL AL300 FTNMR  
CHEMISTRY DEPARTMENT  
Banaras Hindu University  
VARANASI-221005

Operator : Nagendra Kuma  
Shishir Singh

DFILE C:\K.N. Singh,,I.  
COMNT OMe\_1H Mr. Rajesh  
DATIM Mon Jul 16 12:15:  
OBNUC 1H  
EXMOD NON  
OBFRQ 300.40 MHz  
OBSET 130.00 KHz  
OBFIN 1150.0 Hz  
POINT 32768  
FREQU 9505.7 Hz  
SCANS 25  
ACQTM 3.447 sec  
PD 1.547 sec  
PW1 5.2 us  
IRNUC 1H  
CTEMP 21.9 c  
SLVNT CDCL3  
EXREF 0.00 ppm  
BF 1.20 Hz  
RGAIN 10

OMe 13C Mr. Rajeshwer

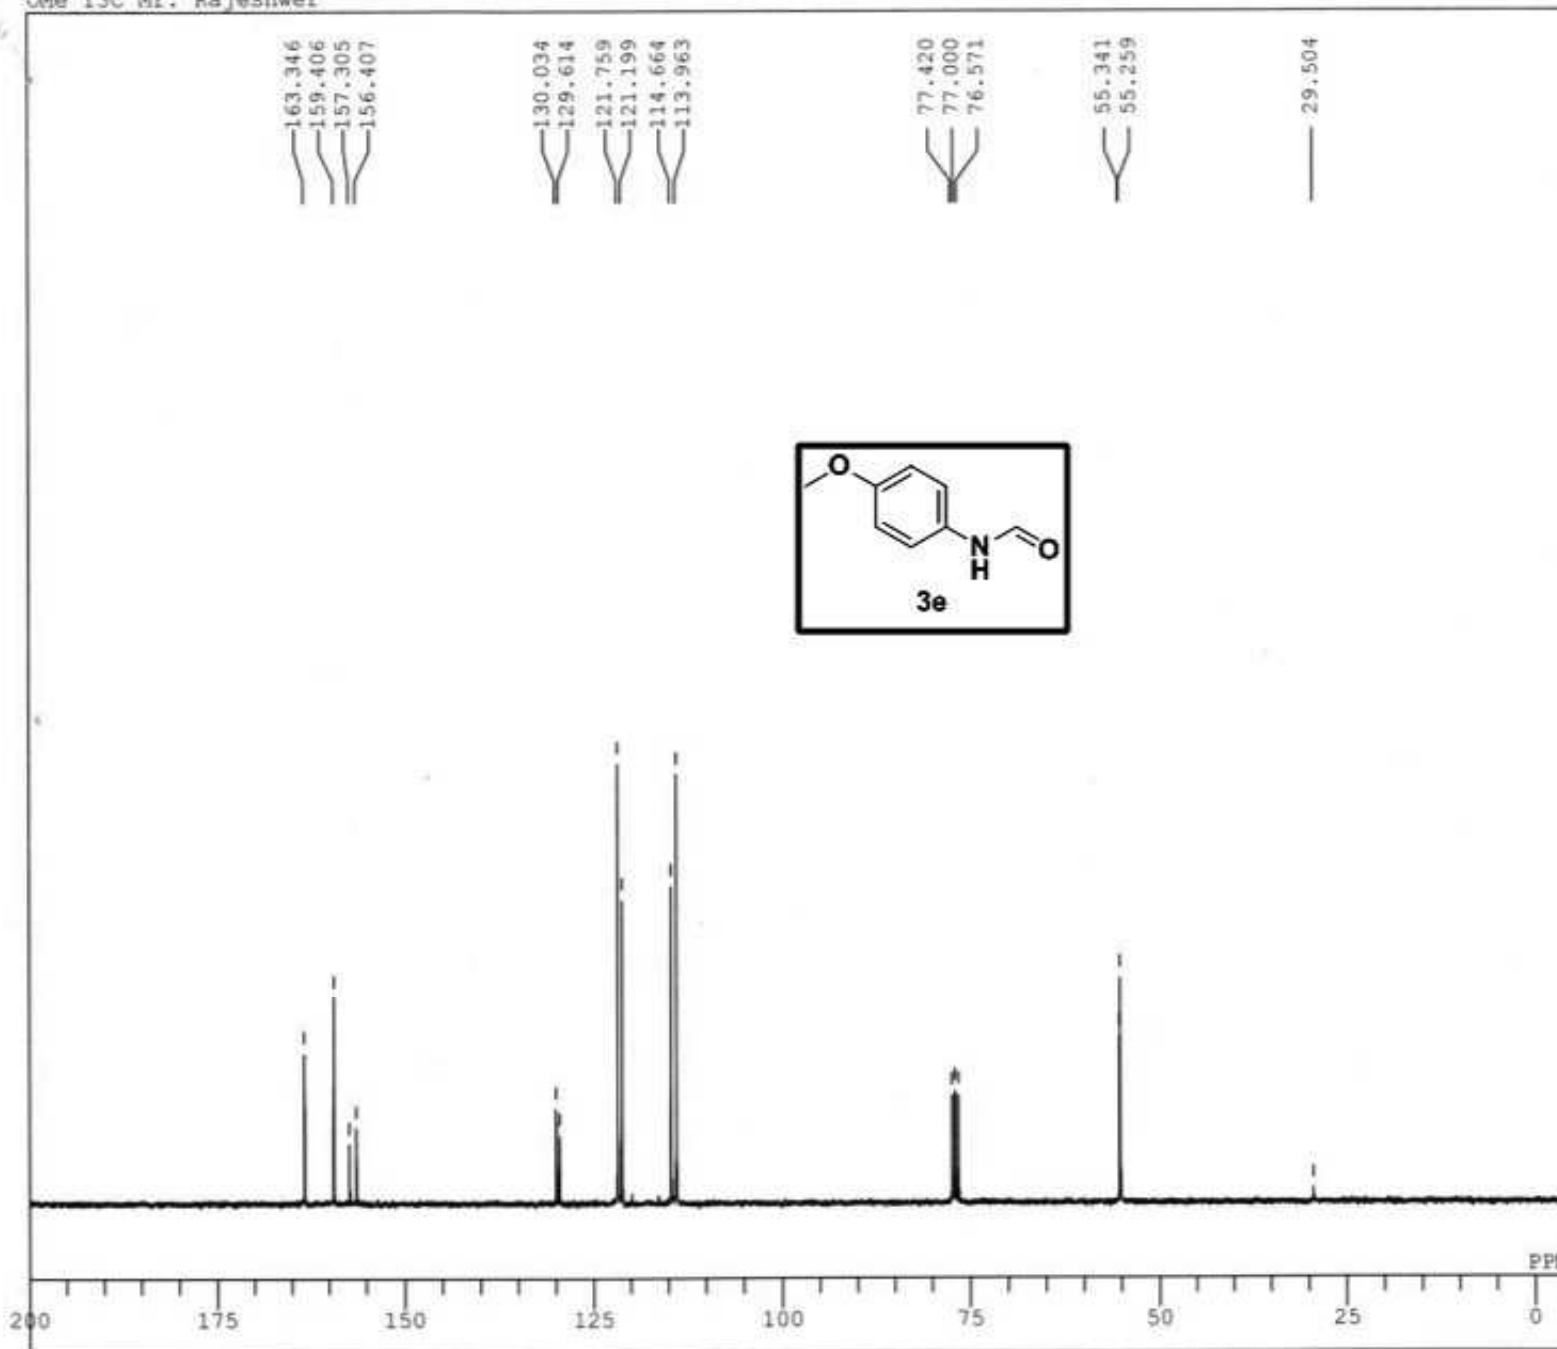

JEOL AL300 FTNMR  
CHEMISTRY DEPARTMENT  
Banaras Hindu University,  
VARANASI-221005

Operator : Nagendra Kumar  
Shishir Singh

DFILE C:\WINNMR98\COMMON\DEFAULT.  
COMNT OMe\_13C\_Mr. Rajeshwer  
DATIM Mon Jul 16 15:52:34 2012  
OBNUC 13C  
EXMOD BCM  
OBFRQ 75.45 MHz  
OBSET 127.30 KHz  
OBFIN 44.7 Hz  
POINT 32768  
FREQU 20408.1 Hz  
SCANS 229  
ACQTM 1.606 sec  
PD 1.394 sec  
PW1 6.0 us  
IRNUC 1H  
CTEMP 24.7 c  
SLVNT CDCL3  
EXREF 77.00 ppm  
BF 1.20 Hz  
RGAIN 25

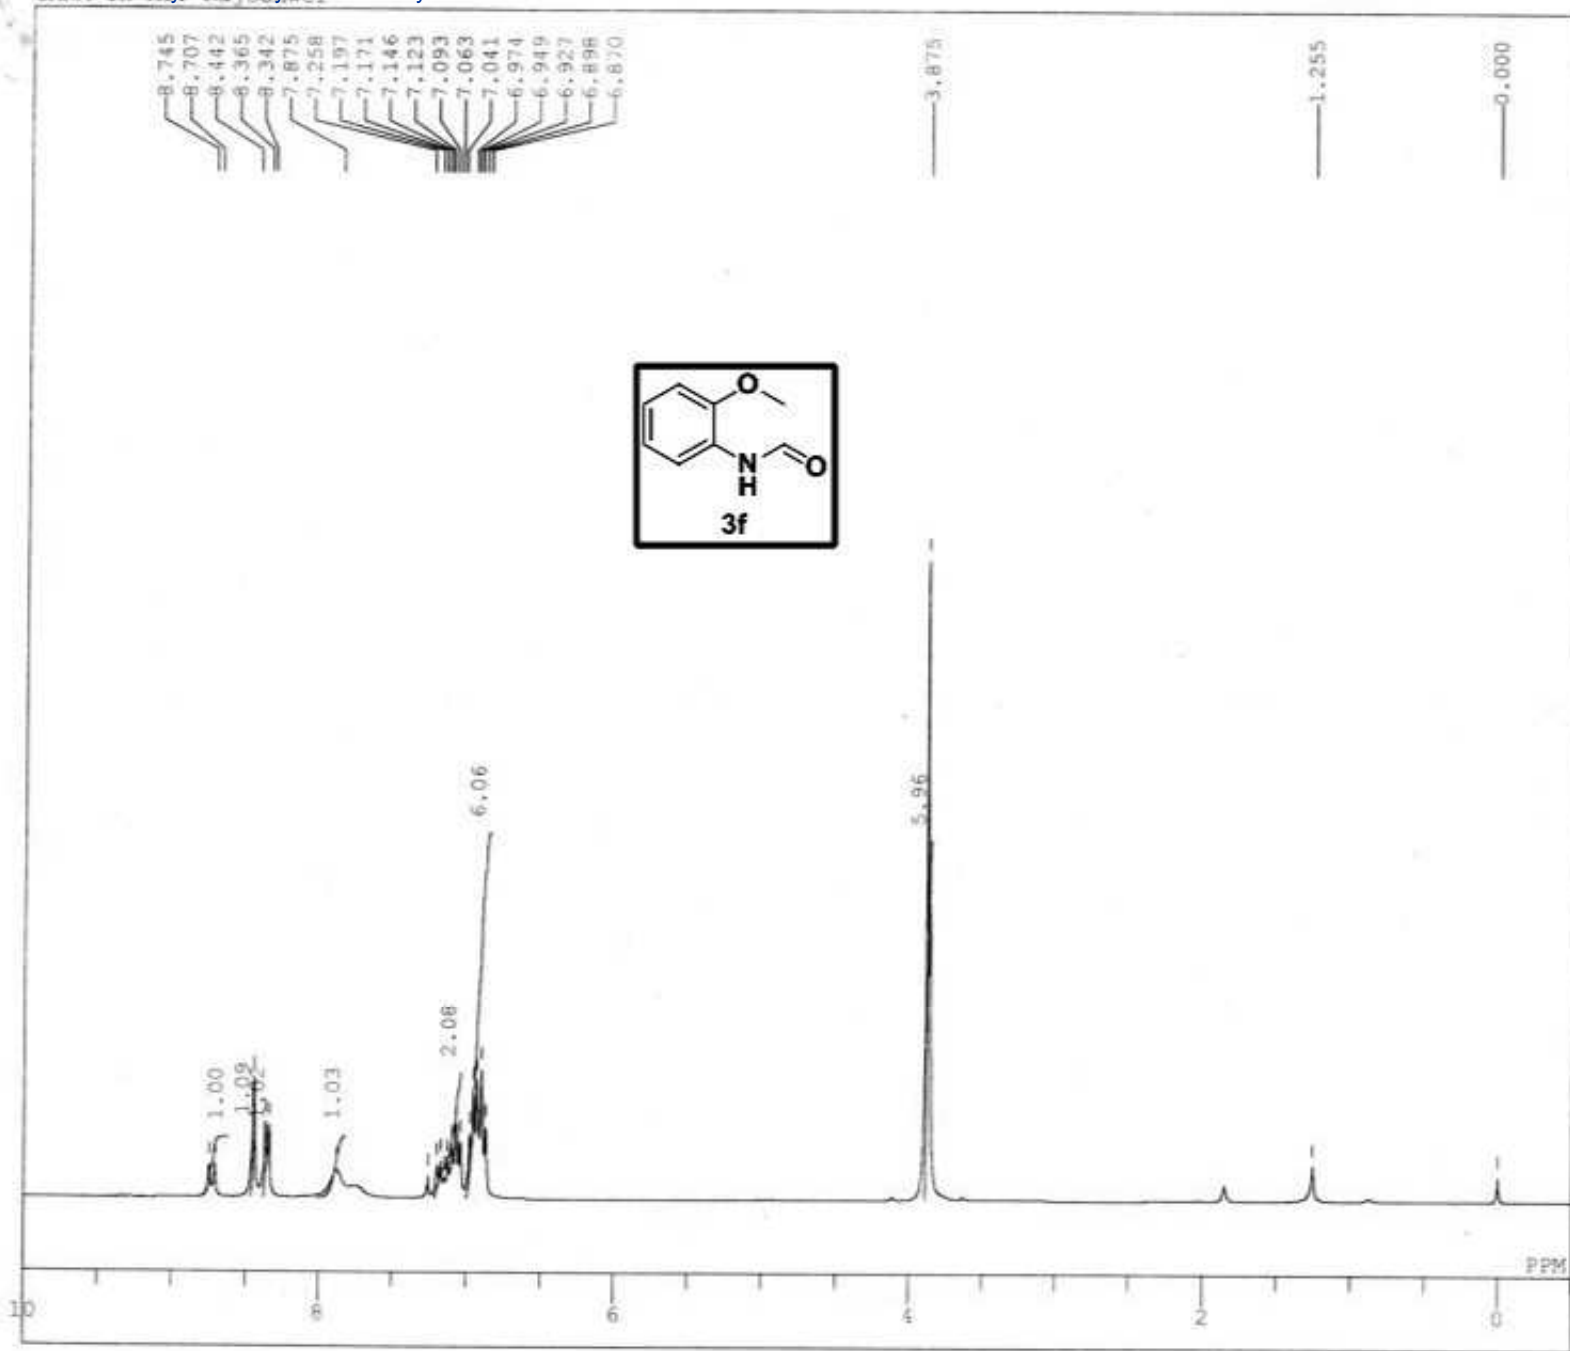

JEOL AL300 FTNMR  
CHEMISTRY DEPARTMENT  
Banaras Hindu University,  
VARANASI-221005

Operator : Nagendra Kumar  
Shishir Singh

DFILE C:\K.N. Singh,,I.T\OANA\_1H.e  
COMNT OANA\_1H\_Mr. Rajeshwer  
DATIM Thu Jul 19 17:19:16 2012  
OBNUC 1H  
EXMOD NON  
OBFRQ 300.40 MHz  
OBSET 130.00 KHz  
OBFIN 1150.0 Hz  
POINT 32768  
FREQU 9505.7 Hz  
SCANS 54  
ACQTM 3.447 sec  
PD 1.547 sec  
PWI 5.2 us  
IRNUC 1H  
CTEMP 21.5 c  
SLVNT CDCL3  
EXREF 0.00 ppm  
BF 1.20 Hz  
RGAIN 13

OANA 13C Mr. Rajeshwer

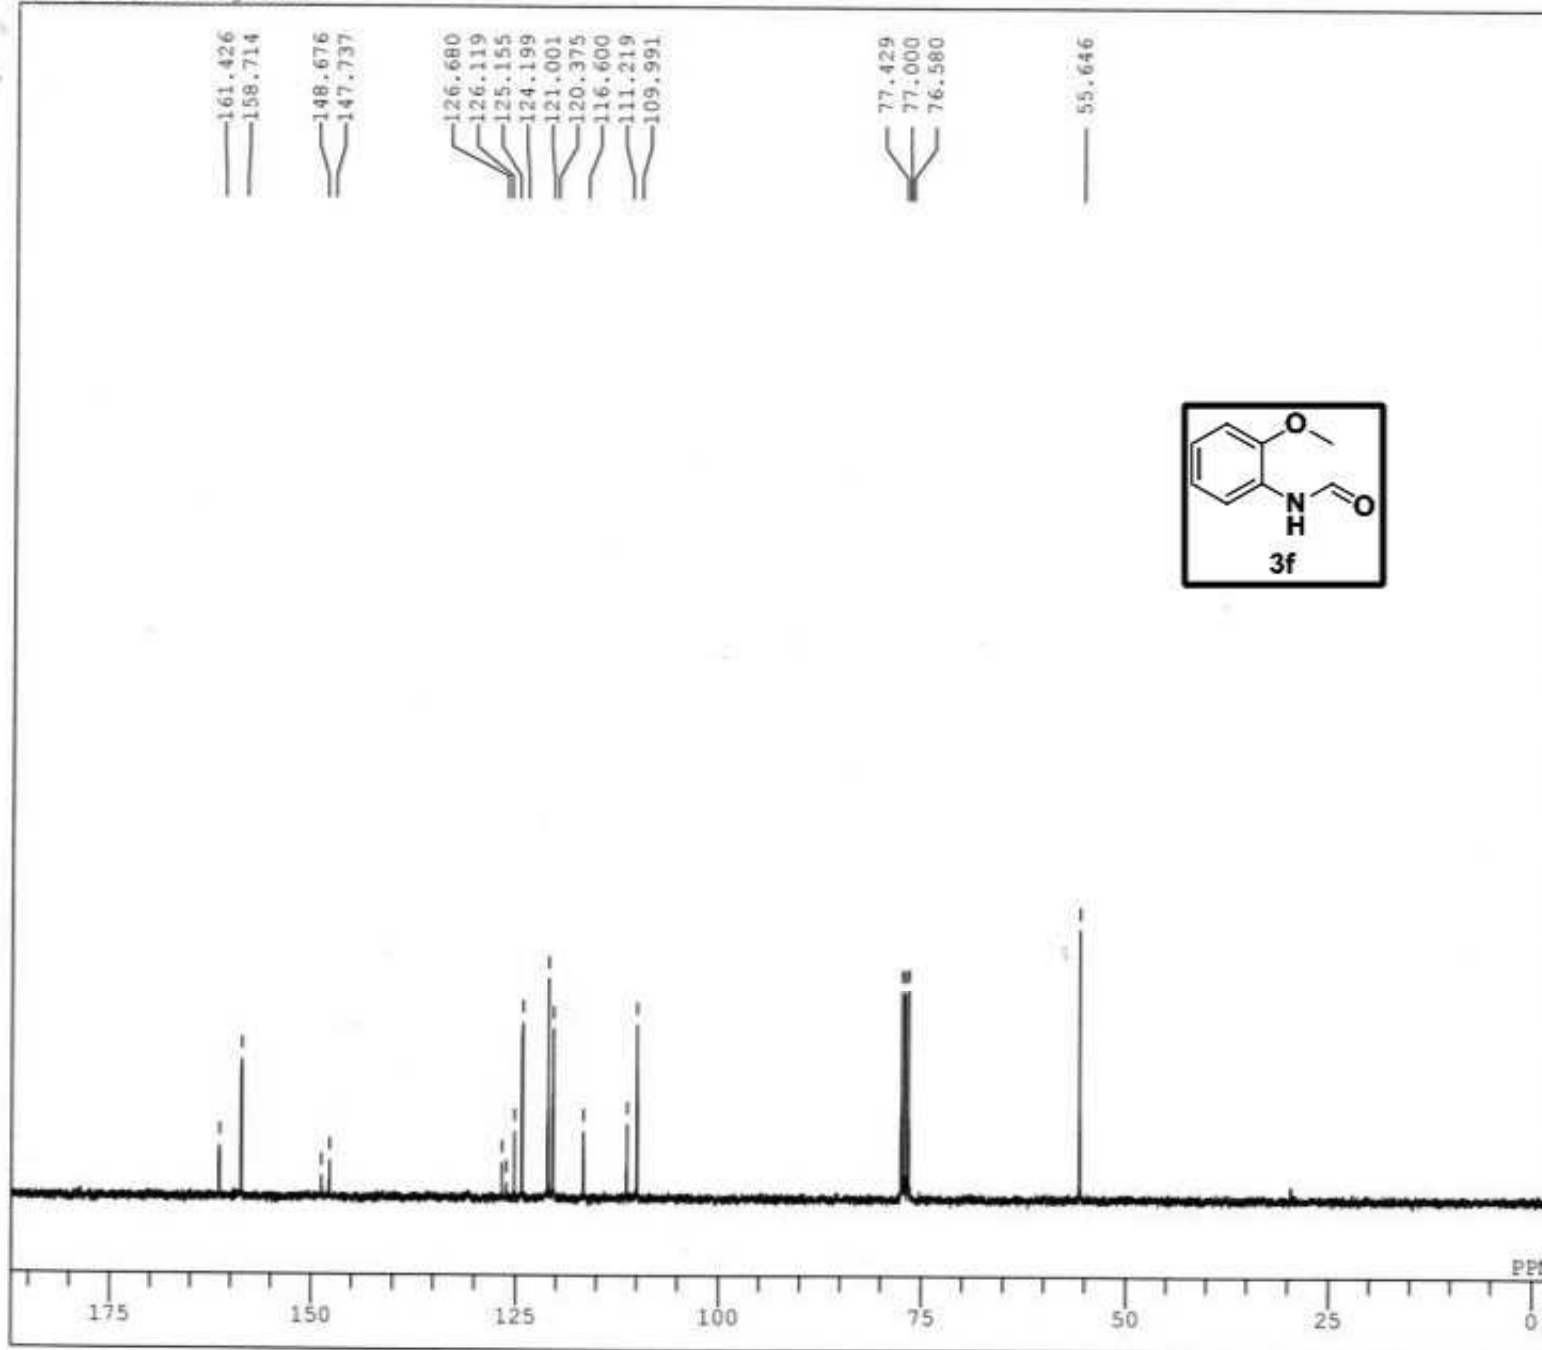

JEOL AL300 FTNMR  
CHEMISTRY DEPARTMENT  
Banaras Hindu University,  
VARANASI-221005

Operator : Nagendra Kumar  
Shishir Singh

DFILE C:\WINNMR98\COMMON\\_DEFAULT.  
COMNT OANA\_13C Mr. Rajeshwer  
DATIM Thu Jul 19 17:37:30 2012  
OBNUC 13C  
EXMOD BCM  
OBFRQ 75.45 MHz  
OBSET 127.30 KHz  
OBFIN 44.7 Hz  
POINT 32768  
FREQU 20408.1 Hz  
SCANS 283  
ACQTM 1.606 sec  
PD 1.394 sec  
PW1 6.0 us  
IRNUC 1H  
CTEMP 24.1 c  
SLVNT CDCL3  
EXREF 77.00 ppm  
BF 1.20 Hz  
RGAIN 25



PCA\_1H\_Mr.Rajeshwar

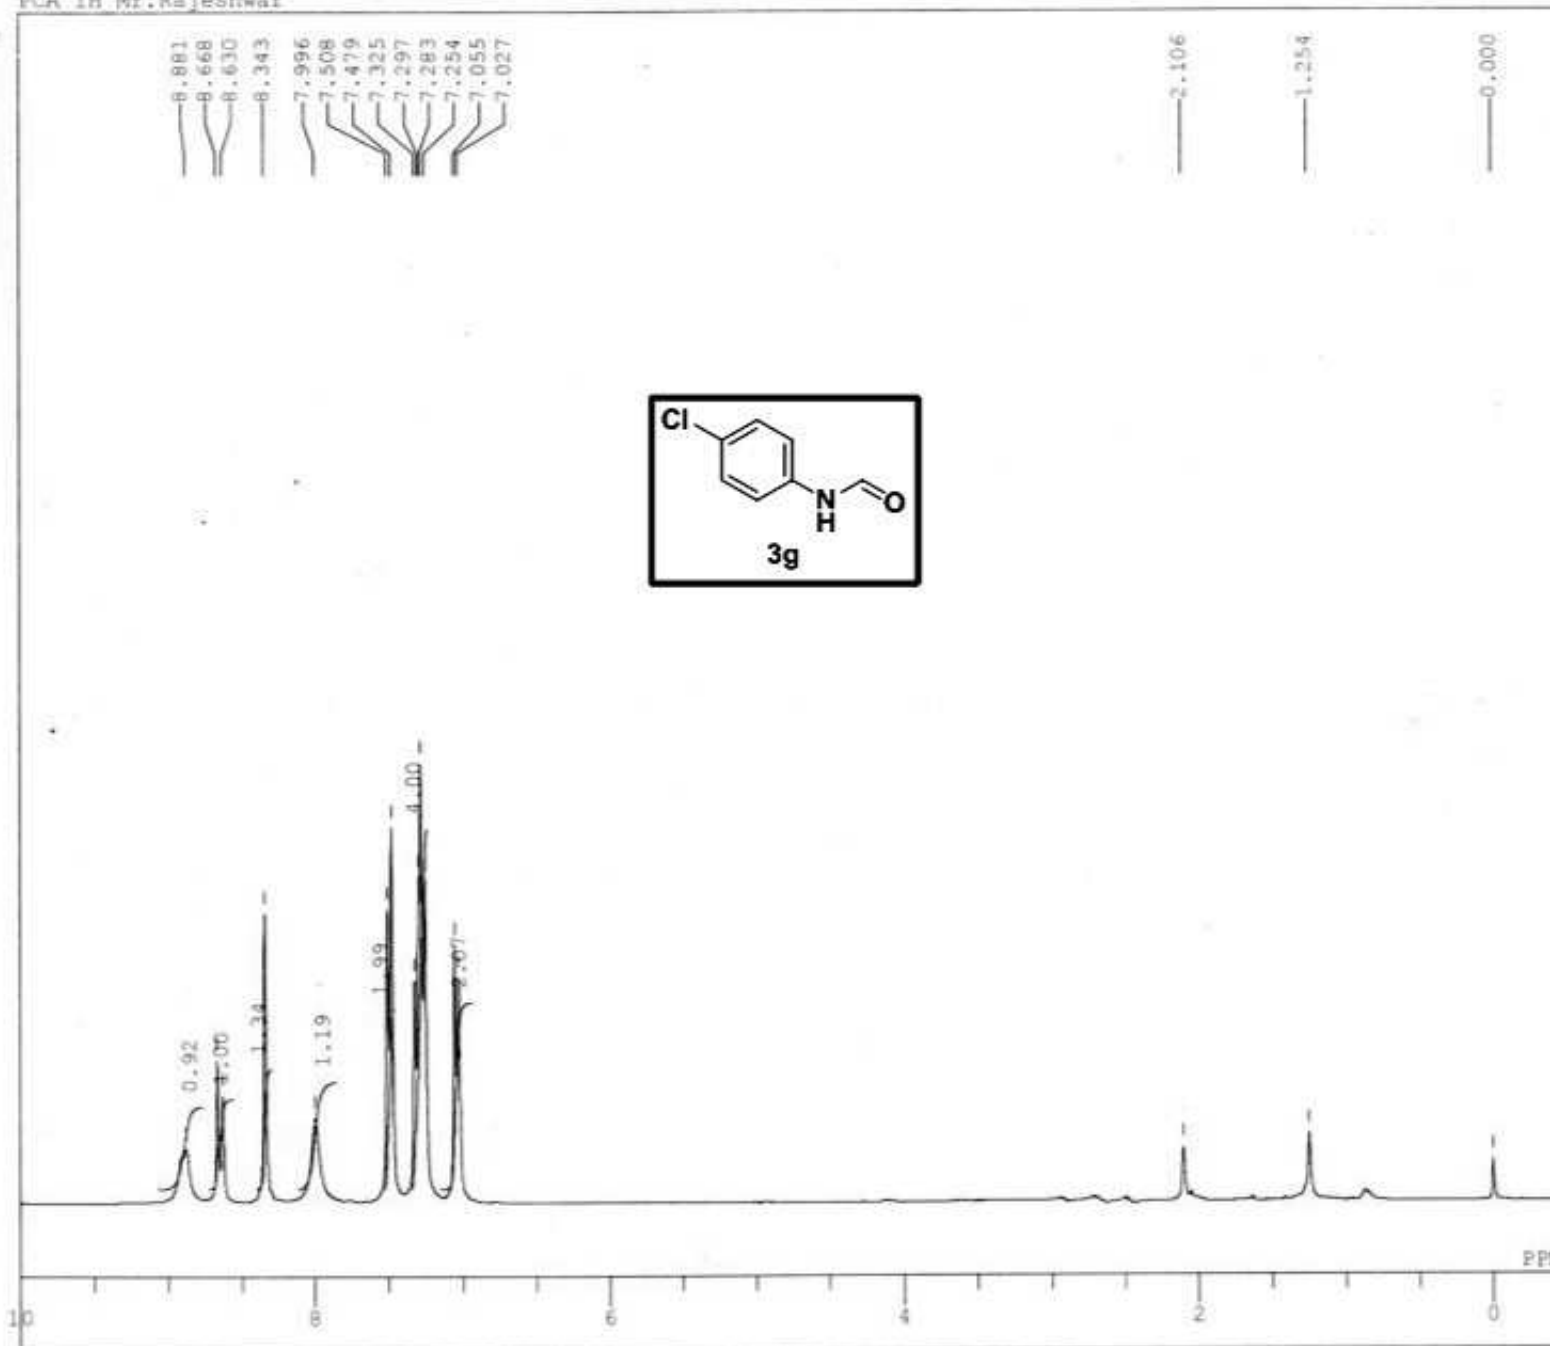

JEOL AL300 FTNMR  
CHEMISTRY DEPARTMENT  
Banaras Hindu University,  
VARANASI-221005

Operator : Nagendra Kumar  
Shishir Singh

DFILE C:\K.N. Singh,,I.T\PCA\_1H.al  
COMNT PCA\_1H\_Mr.Rajeshwar  
DATIM Tue Jul 10 13:13:47 2012  
OBNUC 1H  
EXMOD NON  
OBFRQ 300.40 MHz  
OBSET 130.00 KHz  
OBFIN 1150.0 Hz  
POINT 32768  
FREQU 9505.7 Hz  
SCANS 36  
ACQTM 3.447 sec  
PD 1.547 sec  
PWI 5.2 us  
IRNUC 1H  
CTEMP 19.1 c  
SLVNT CDCL3  
EXREF 0.00 ppm  
BF 1.20 Hz  
RGAIN 14

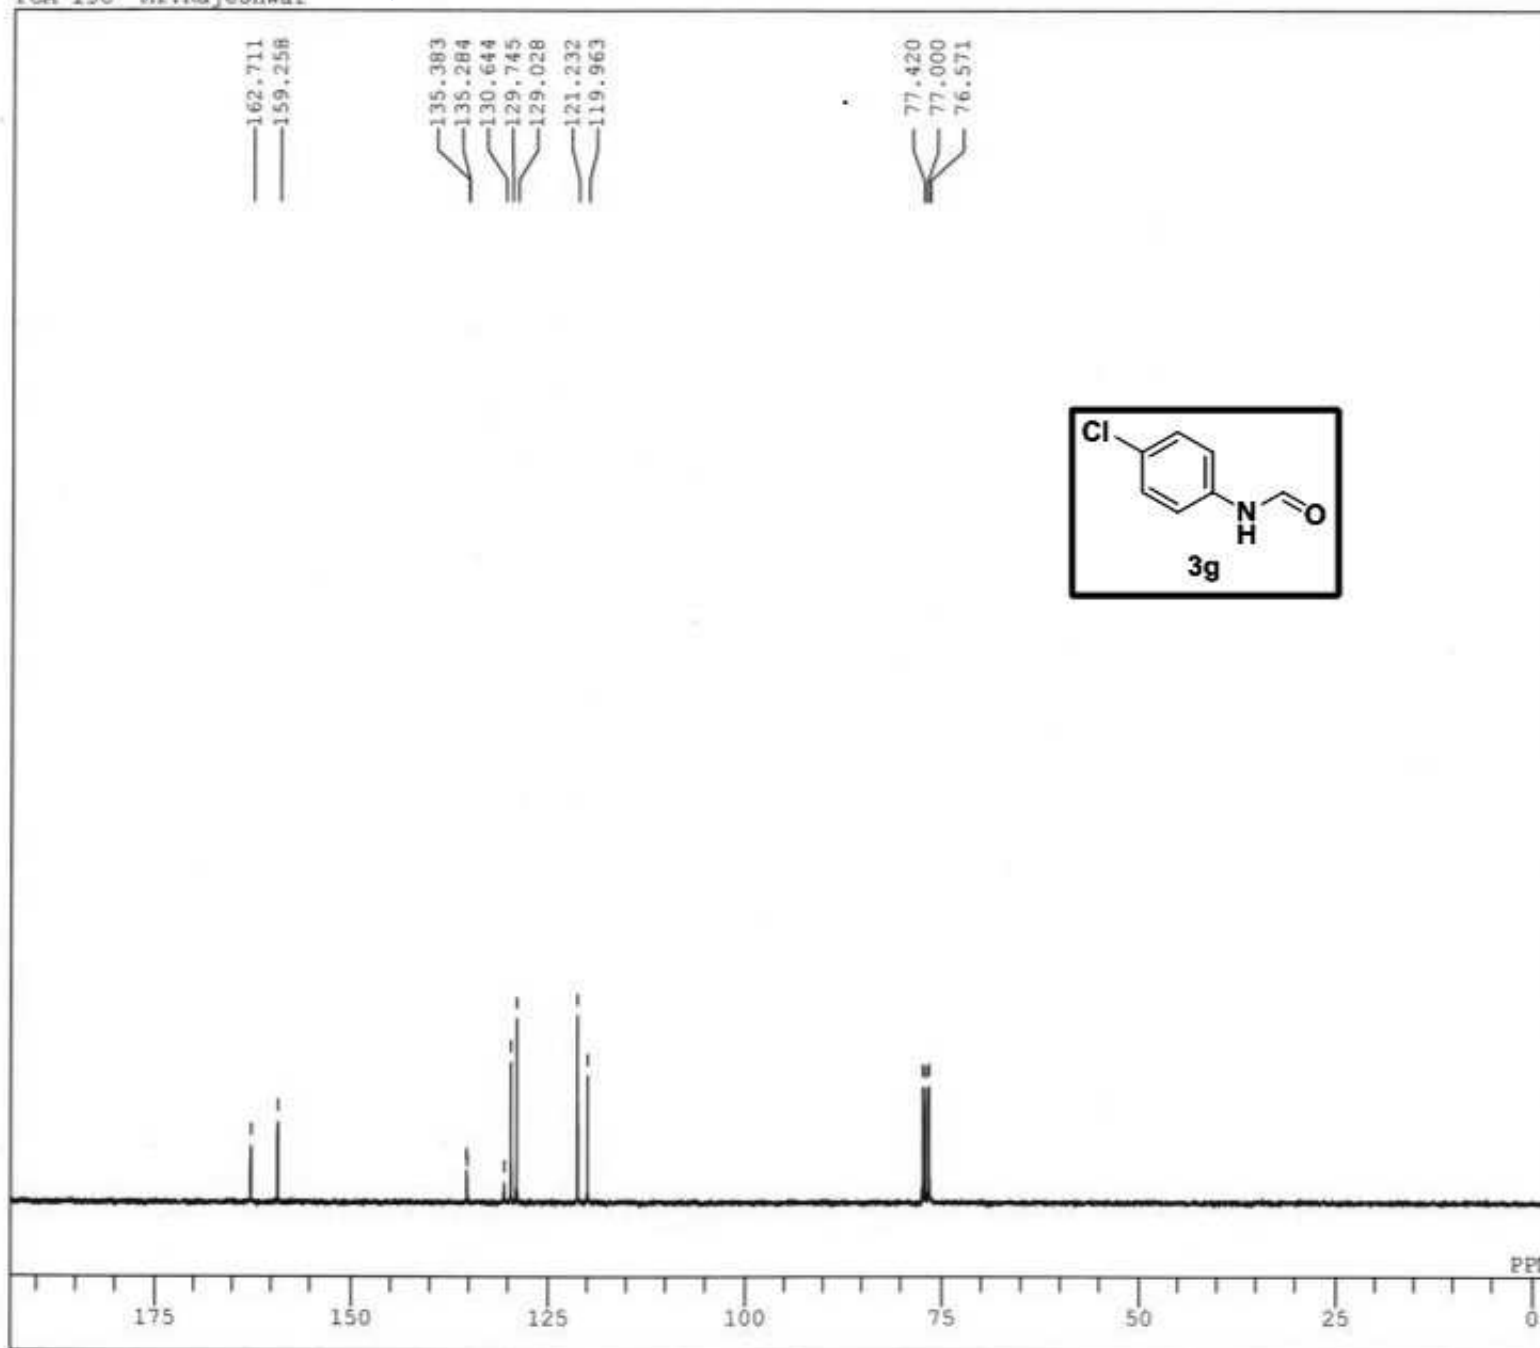

JEOL AL300 FTNMR  
CHEMISTRY DEPARTMENT  
Banaras Hindu University,  
VARANASI-221005

Operator : Nagendra Kumar  
Shishir Singh

DFILE C:\WINNMR98\COMMON\\_DEFAULT.  
COMNT PCA\_13C Mr.Rajeshwar  
DATIM Tue Jul 10 13:34:38 2012  
OBNUC 13C  
EXMOD BCM  
OBFRQ 75.45 MHz  
OBSET 127.30 KHz  
OBFIN 44.7 Hz  
POINT 32768  
FREQU 20408.1 Hz  
SCANS 160  
ACQTM 1.606 sec  
PD 1.394 sec  
PW1 6.0 us  
IRNUC 1H  
CTEMP 19.5 c  
SLVNT CDCL3  
EXREF 77.00 ppm  
BF 1.20 Hz  
RGAIN 23

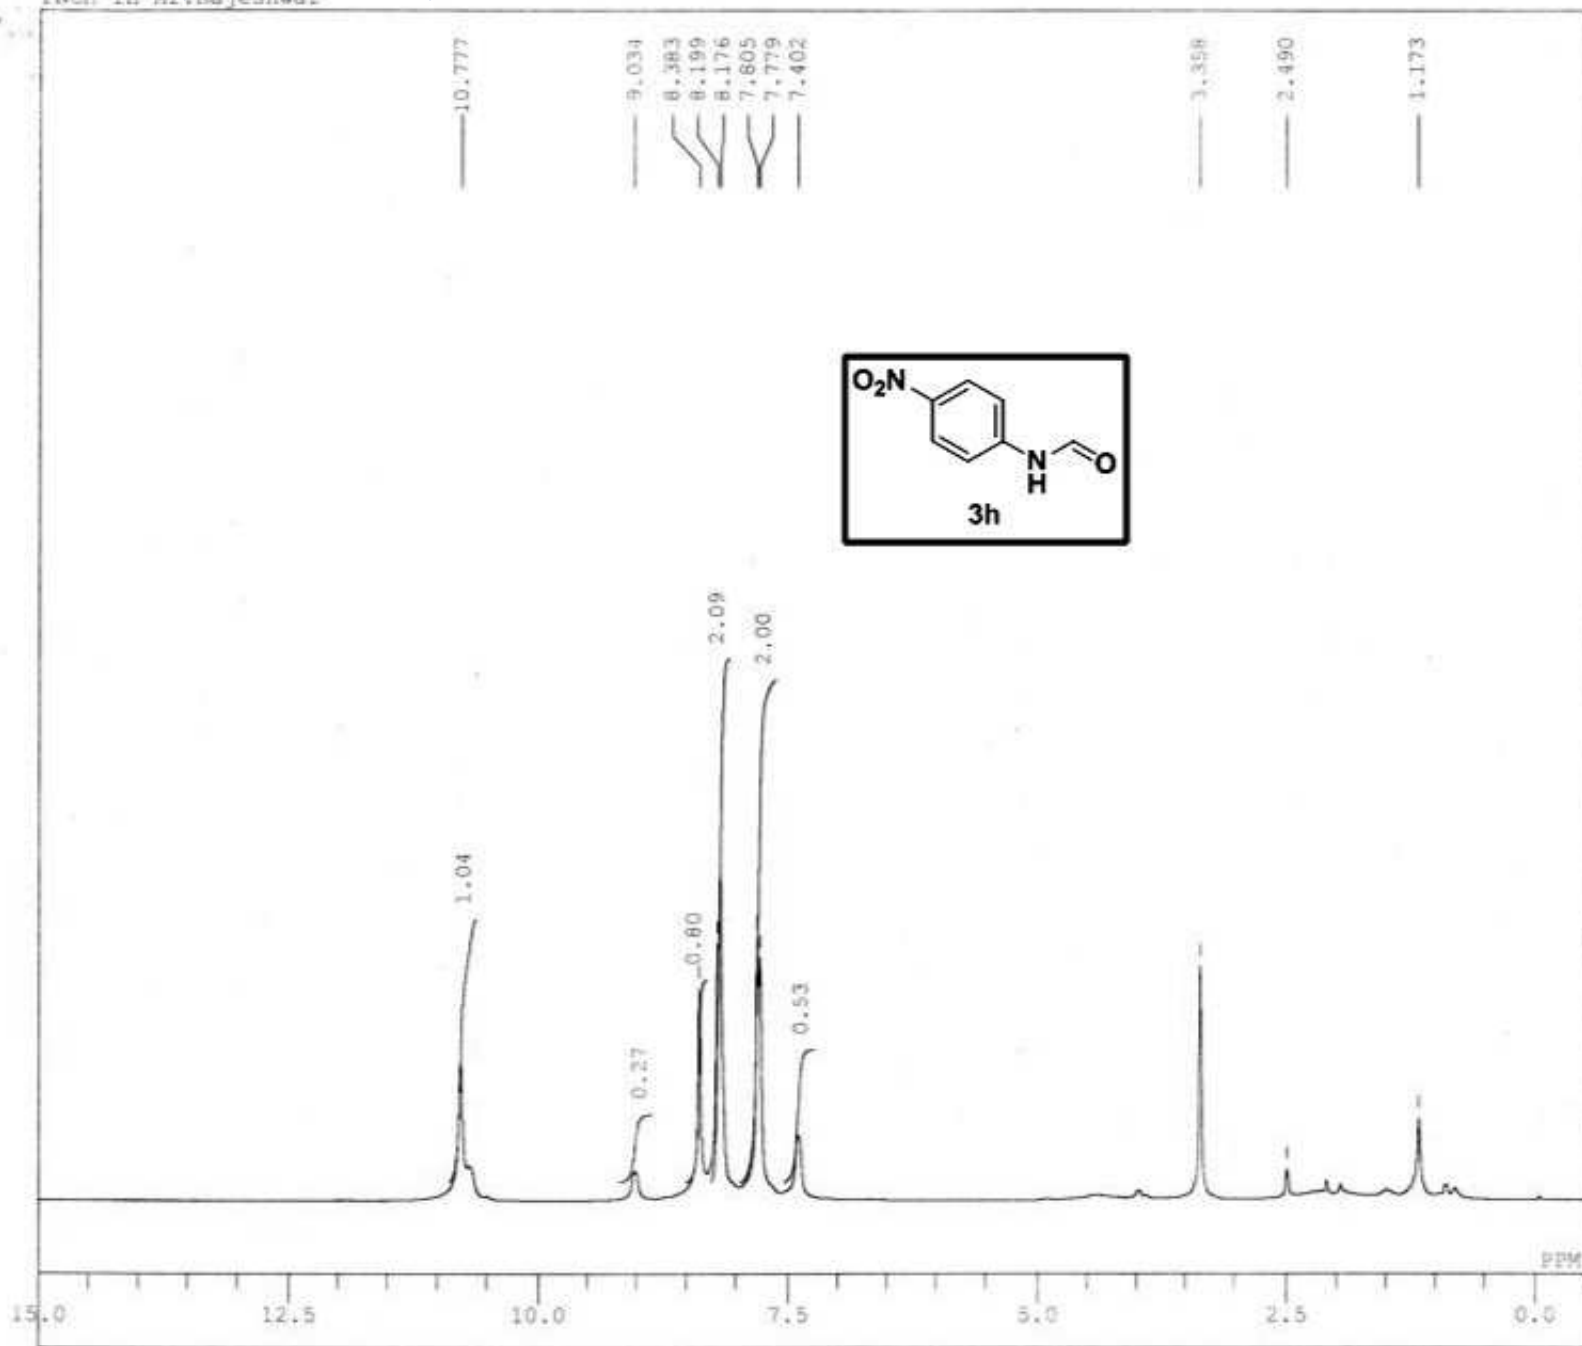

JEOL AL300 FTNMR  
CHEMISTRY DEPARTMENT  
Banaras Hindu University,  
VARANASI-221005

Operator : Nagendra Kumar  
Shishir Singh

DFILE C:\K.N. Singh,,I.T\PNCH\_1H.e  
COMNT PNCH\_1H\_Mr.Rajeshwar  
DATIM Wed Aug 22 12:06:45 2012  
OBNUC 1H  
EXMOD NON  
OBFRQ 300.40 MHz  
OBSET 130.00 KHz  
OBFIN 1150.0 Hz  
POINT 32768  
FREQU 9505.7 Hz  
SCANS 32  
ACQTM 3.447 sec  
PD 1.547 sec  
PW1 5.2 us  
IRNUC 1H  
CTEMP 21.1 c  
SLVNT DMSO  
EXREF 2.49 ppm  
BF 1.20 Hz  
RGAIN 13

PNCH 1H Mr. Rajeshwar

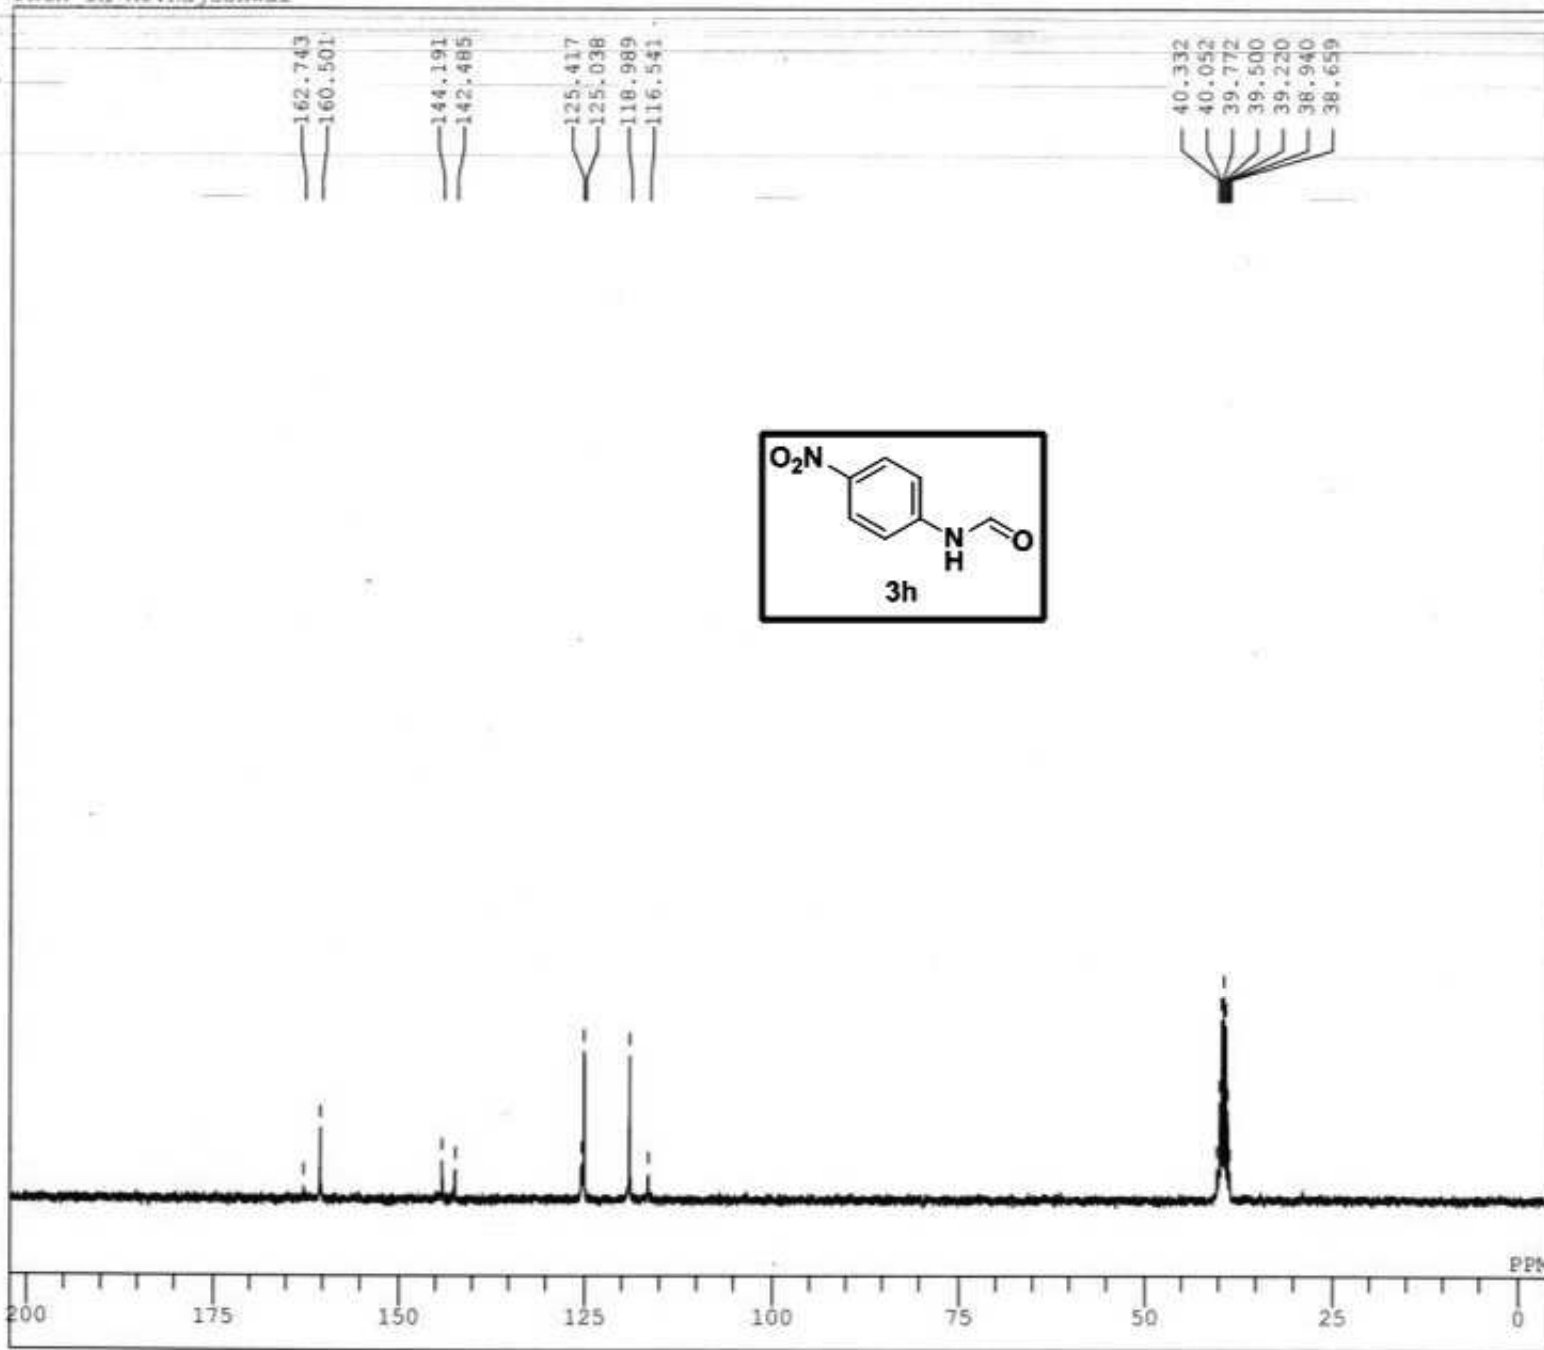

JEOL AL300 FTNMR  
CHEMISTRY DEPARTMENT  
Banaras Hindu University,  
VARANASI-221005

Operator : Nagendra Kumar  
Shishir Singh

DFILE C:\WINNMR98\COMMON\\_DEFAULT.  
COMNT PNCH 1H Mr. Rajeshwar  
DATIM Wed Aug 22 12:14:59 2012  
OBNUC 13C  
EXMOD BCM  
OBFREQ 75.45 MHz  
OBSET 127.30 KHz  
OBFIN 44.7 Hz  
POINT 32768  
FREQU 20408.1 Hz  
SCANS 100  
ACQTM 1.606 sec  
PD 1.394 sec  
PW1 6.0 us  
IRNUC 1H  
CTEMP 24.8 c  
SLVNT DMSO  
EXREF 39.50 ppm  
BF 1.20 Hz  
RGAIN 24

MNO 1H Mr. Rajeshwer

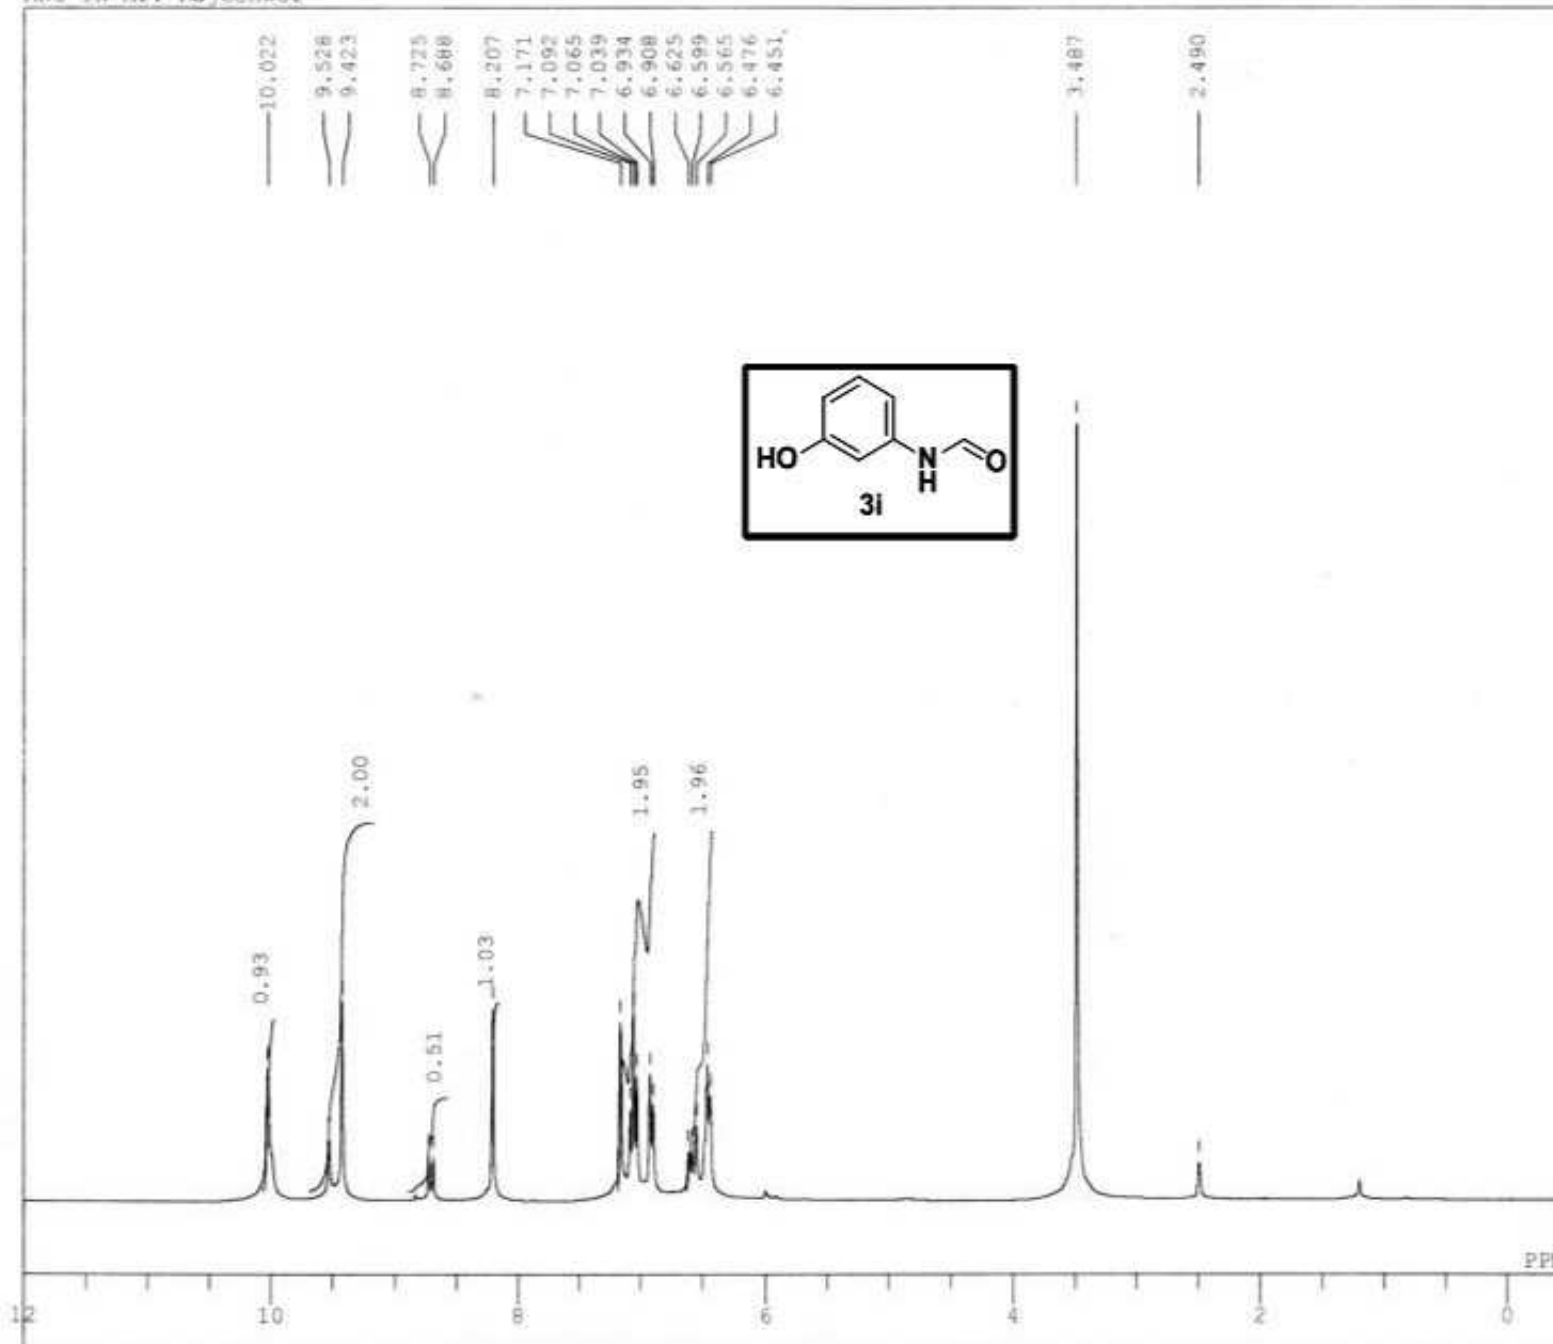

JEOL AL300 FTNMR  
CHEMISTRY DEPARTMENT  
Banaras Hindu University,  
VARANASI-221005

Operator : Nagendra Kumar  
Shishir Singh

DFILE C:\K.N. Singh,,I.T\MNO\_1H.a1  
COMNT MNO\_1H Mr. Rajeshwer  
DATIM Sat Jul 28 11:16:01 2012  
OBNUC 1H  
EXMOD NON  
OBFRQ 300.40 MHz  
OBSET 130.00 KHz  
OBFIN 1150.0 Hz  
POINT 32768  
FREQU 9505.7 Hz  
SCANS 64  
ACQTM 3.447 sec  
PD 1.547 sec  
PW1 5.2 us  
IRNUC 1H  
CTEMP 21.7 c  
SLVNT DMSO  
EXREF 2.49 ppm  
BF 1.20 Hz  
RGAIN 11

MNO 13C Mr. Rajeshwer

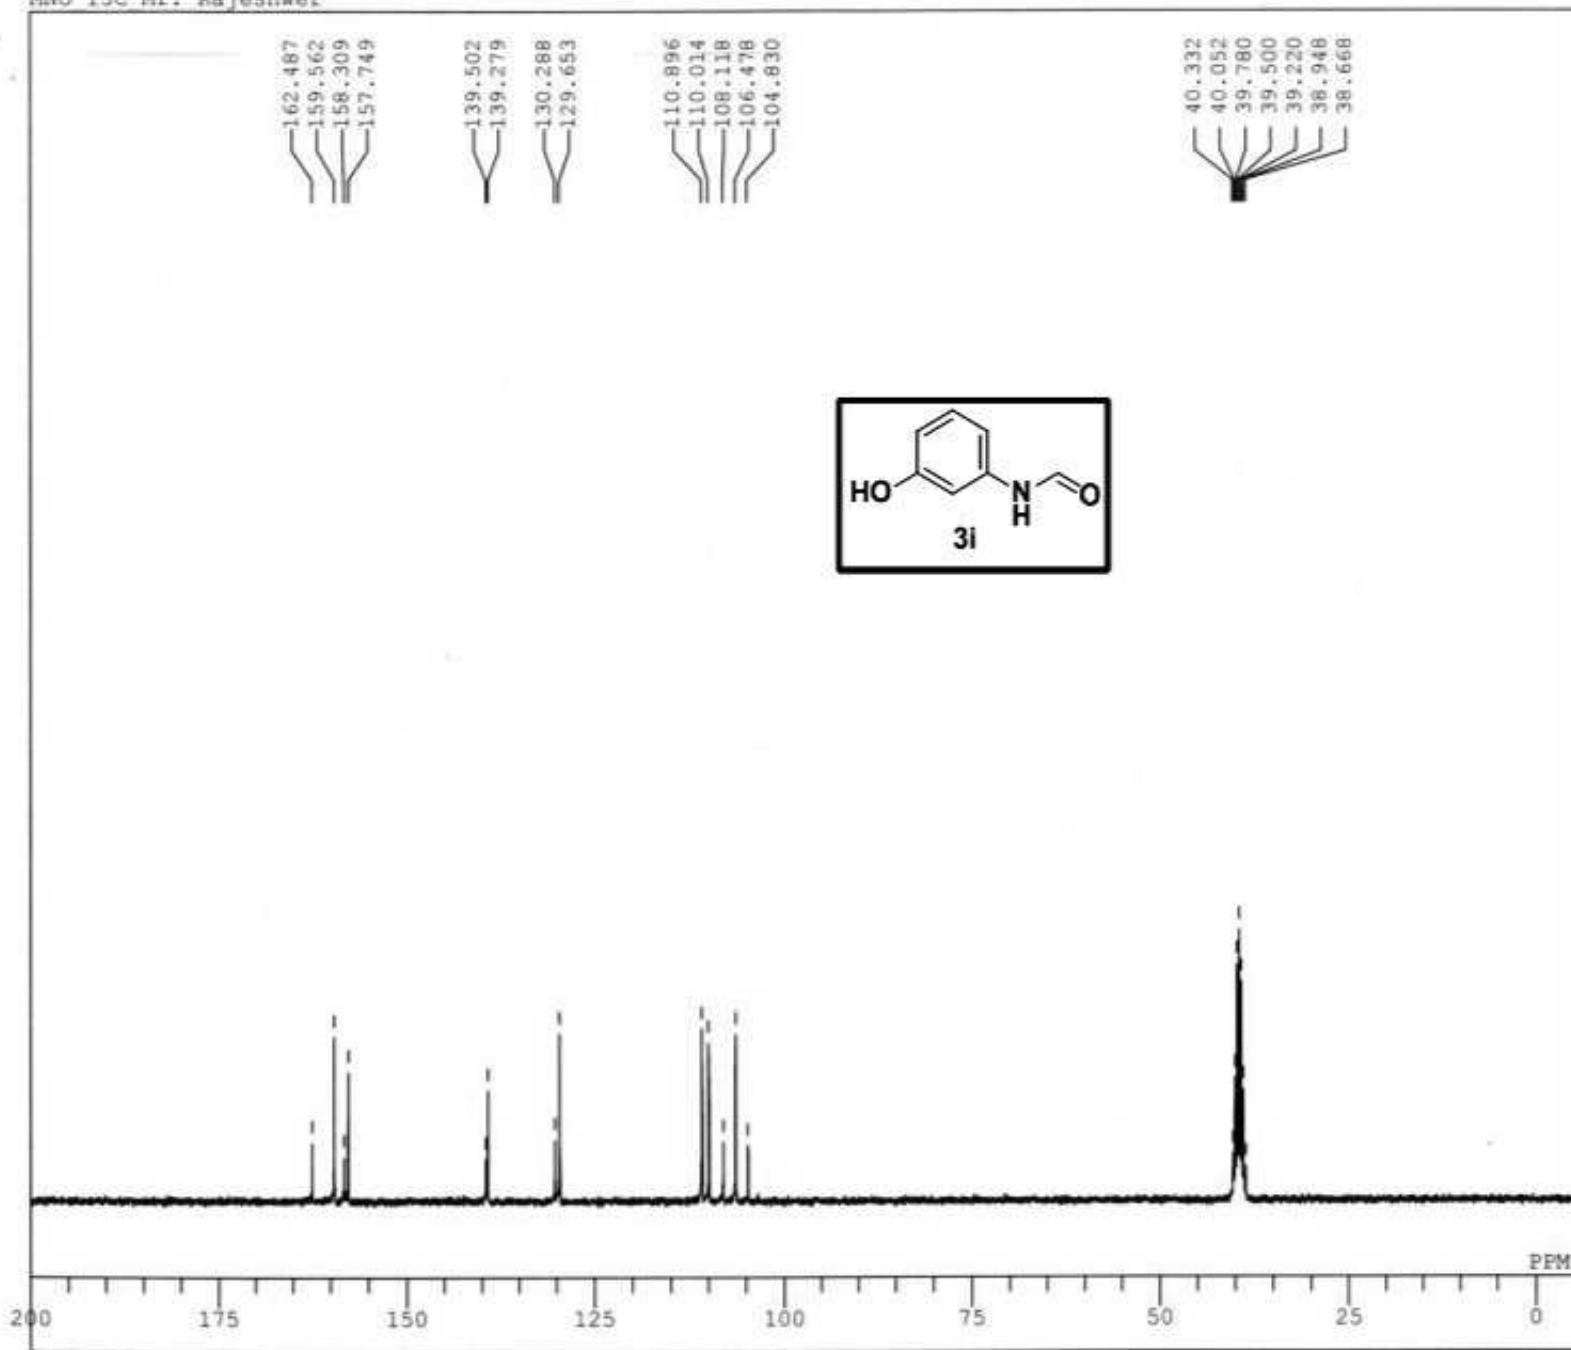

JEOL AL300 FTNMR  
CHEMISTRY DEPARTMENT  
Banaras Hindu University,  
VARANASI-221005

Operator : Nagendra Kumar  
Shishir Singh

DFILE C:\WINNMR98\COMMON\\_DEFAULT.  
COMNT MNO\_13C\_Mr. Rajeshwer  
DATIM Sat Jul 28 11:30:01 2012  
OBNUC 13C  
EXMOD BCM  
OBFREQ 75.45 MHz  
OBSET 127.30 KHz  
OBFIN 44.7 Hz  
POINT 32768  
FREQU 20408.1 Hz  
SCANS 202  
ACQTM 1.606 sec  
PD 1.394 sec  
PW1 6.0 us  
IRNUC 1H  
CTEMP 21.6 c  
SLVNT DMSO  
EXREF 39.50 ppm  
BF 1.20 Hz  
RGAIN 24

NMA\_1H-Mr. Bharat

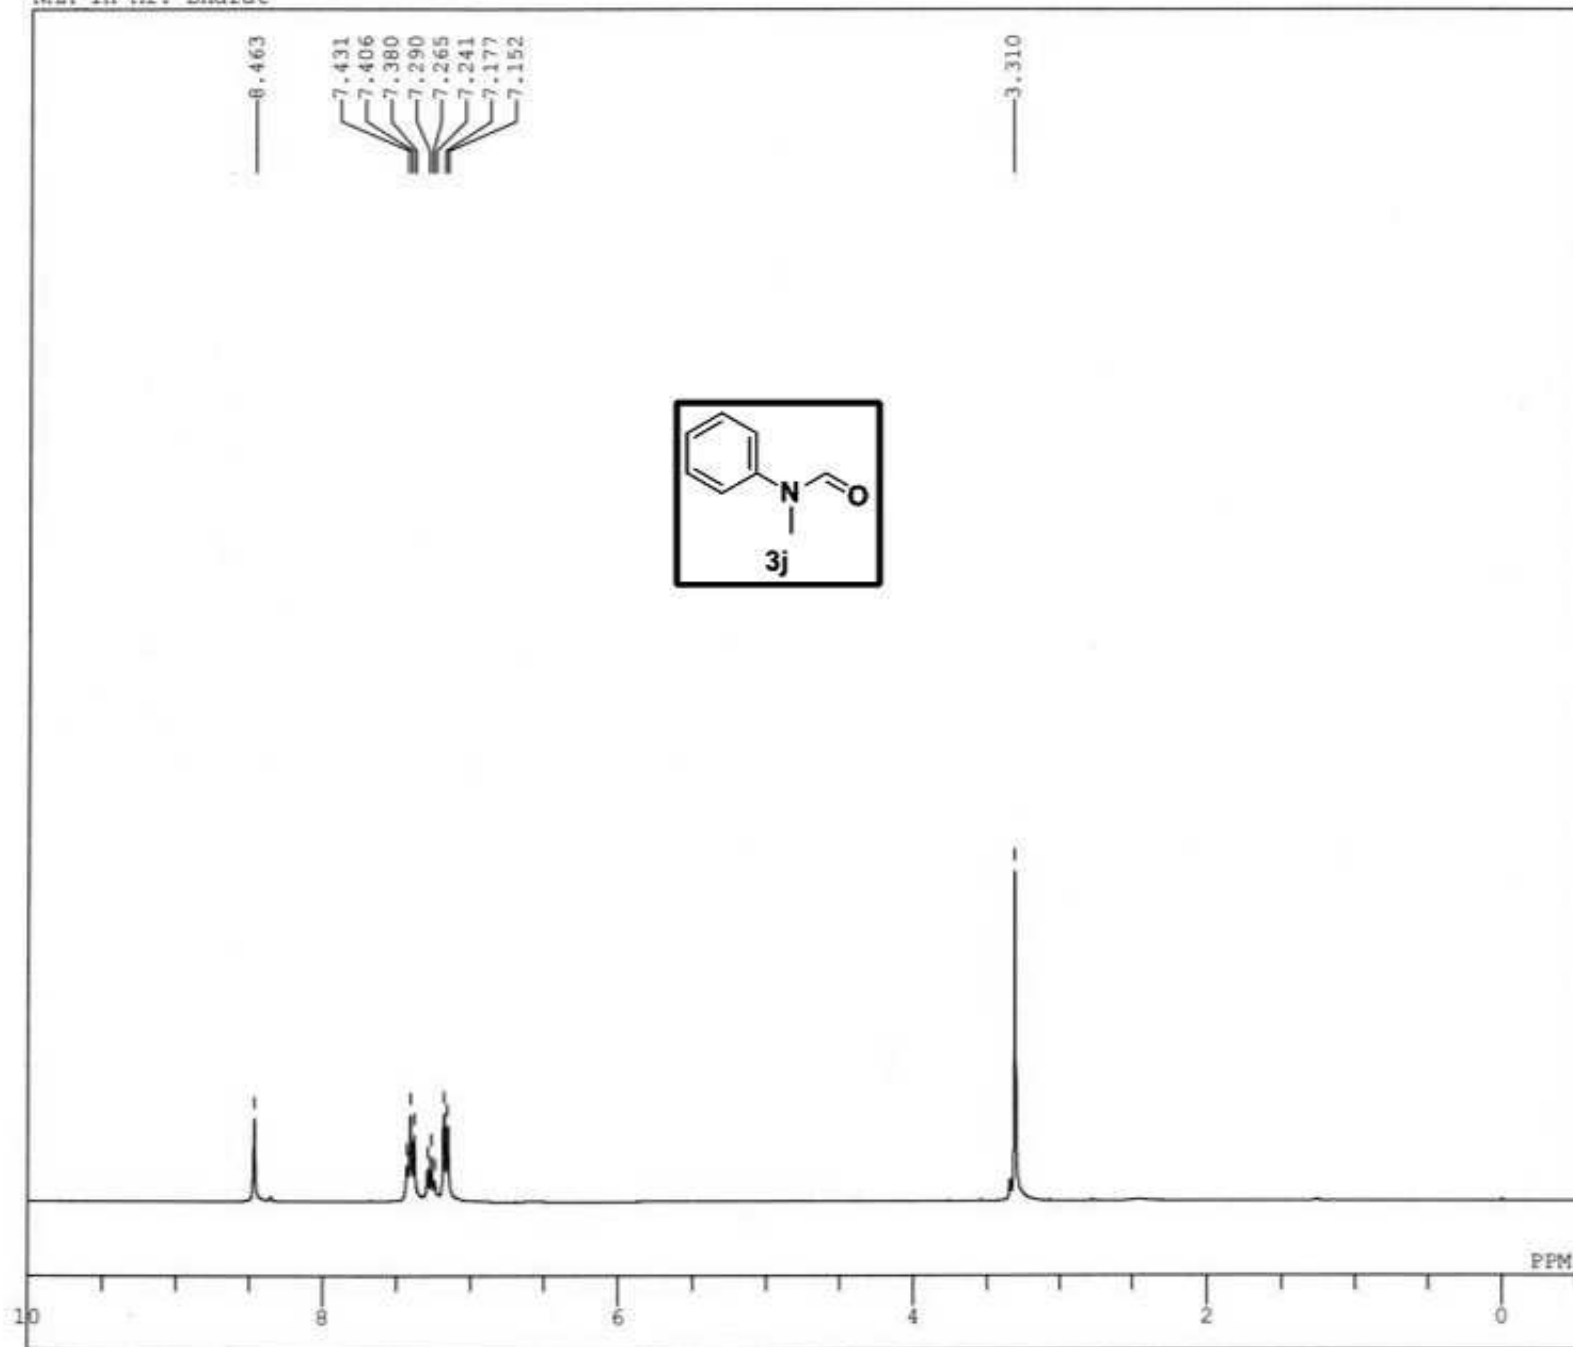

JEOL AL300 FTNMR  
CHEMISTRY DEPARTMENT  
Banaras Hindu University,  
VARANASI-221005

Operator : Nagendra Kumar  
Shishir Singh

DFILE C:\K.N. Singh,,I.T\NMA\_1H1NC  
COMNT NMA\_1H-Mr. Bharat  
DATIM Sat Dec 01 13:55:16 2012  
OBNUC 1H  
EXMOD NON  
OBFRQ 300.40 MHz  
OBSET 130.00 KHz  
OBFIN 1150.0 Hz  
POINT 32768  
FREQU 6016.8 Hz  
SCANS 32  
ACQTM 5.446 sec  
PD 1.547 sec  
PW1 5.2 us  
IRNUC 1H  
CTEMP 19.3 c  
SLVNT CDCL3  
EXREF 0.00 ppm  
BF 1.20 Hz  
RGAIN 10

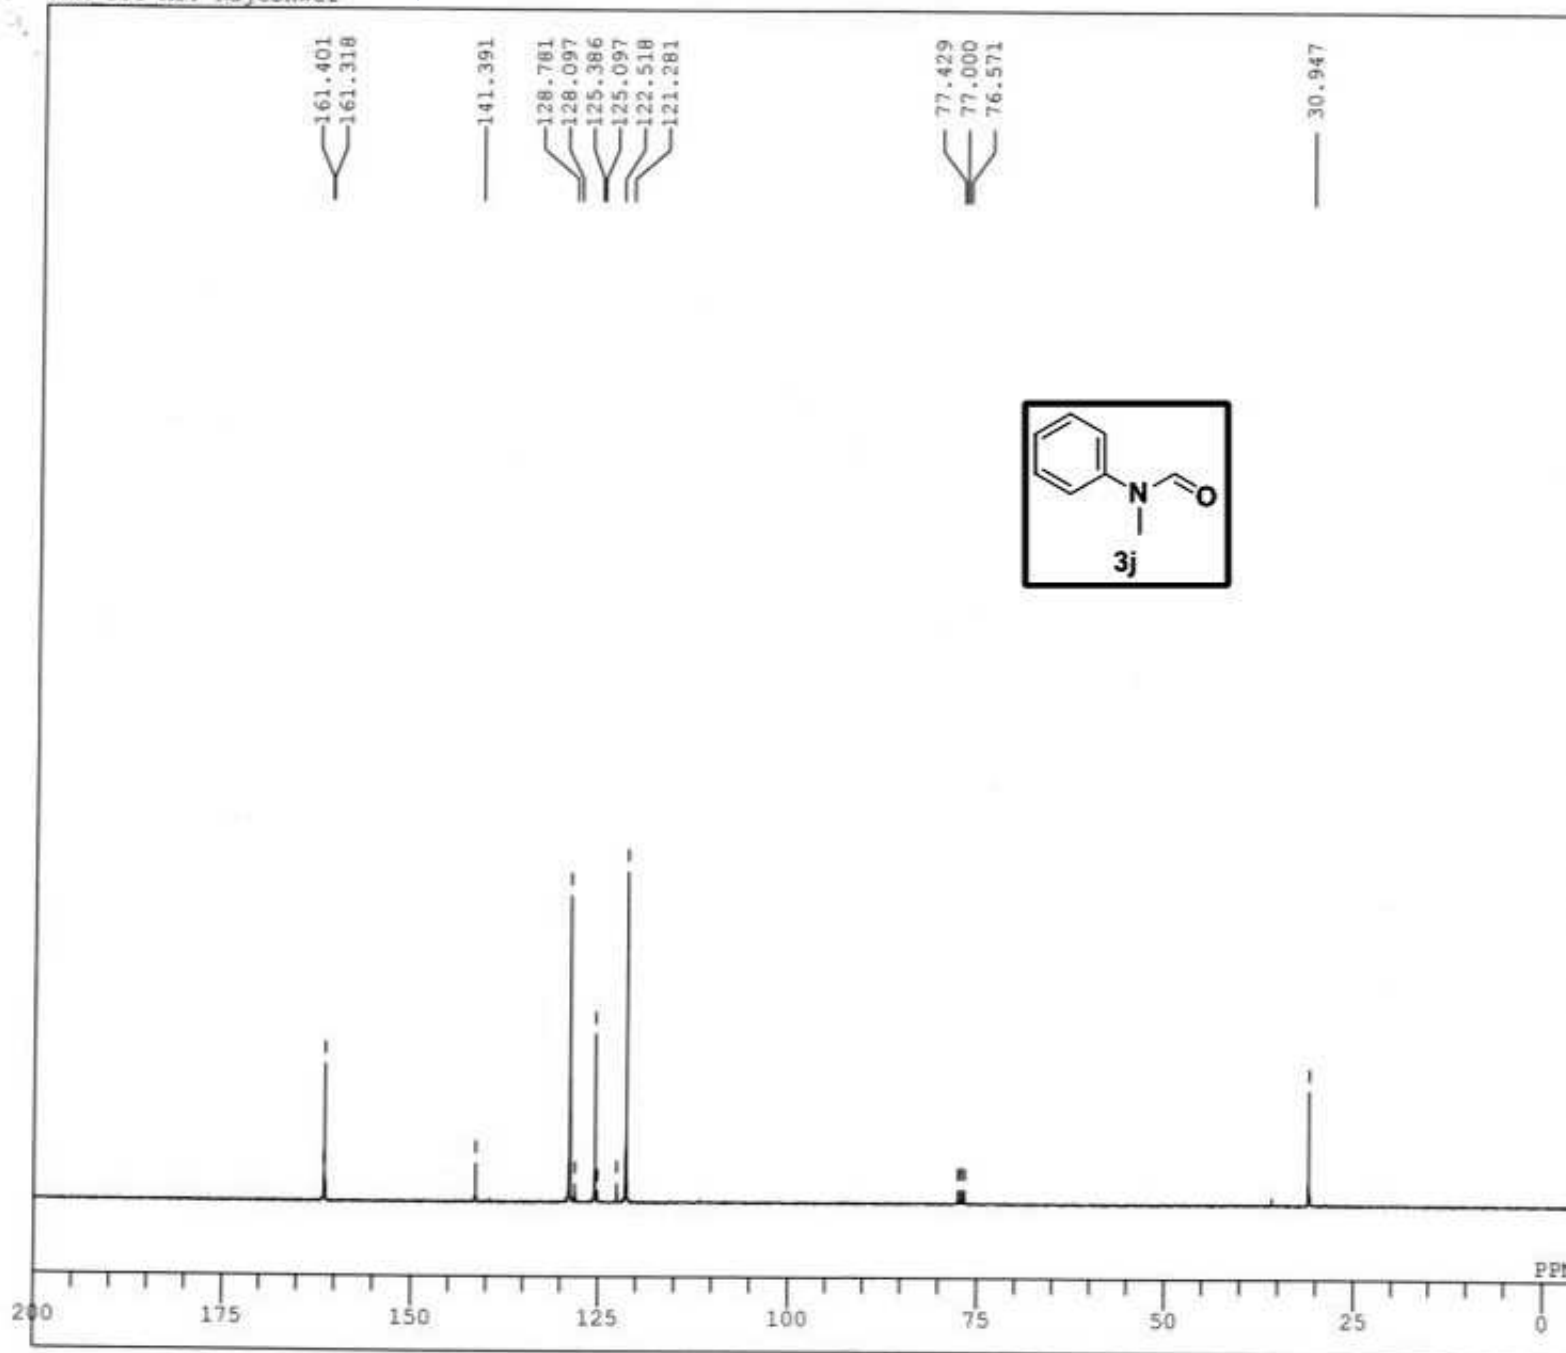

JEOL AL300 FTNMR  
CHEMISTRY DEPARTMENT  
Banaras Hindu University,  
VARANASI-221005

Operator : Nagendra Kumar  
Shishir Singh

DFILE C:\WINNMR98\COMMON\\_DEFAULT.  
COMNT NMA\_13C\_Mr. Rajeshwer  
DATIM Wed Jul 04 13:24:38 2012  
OBNUC 13C  
EXMOD BCM  
OBFRQ 75.45 MHz  
OBSET 127.30 KHz  
OBFIN 44.7 Hz  
POINT 32768  
FREQU 20408.1 Hz  
SCANS 160  
ACQTM 1.606 sec  
FD 1.394 sec  
PW1 6.0 us  
IRNUC 1H  
CTEMP 20.9 c  
SLVNT CDCL3  
EXREF 77.00 ppm  
BF 1.20 Hz  
RGAIN 22



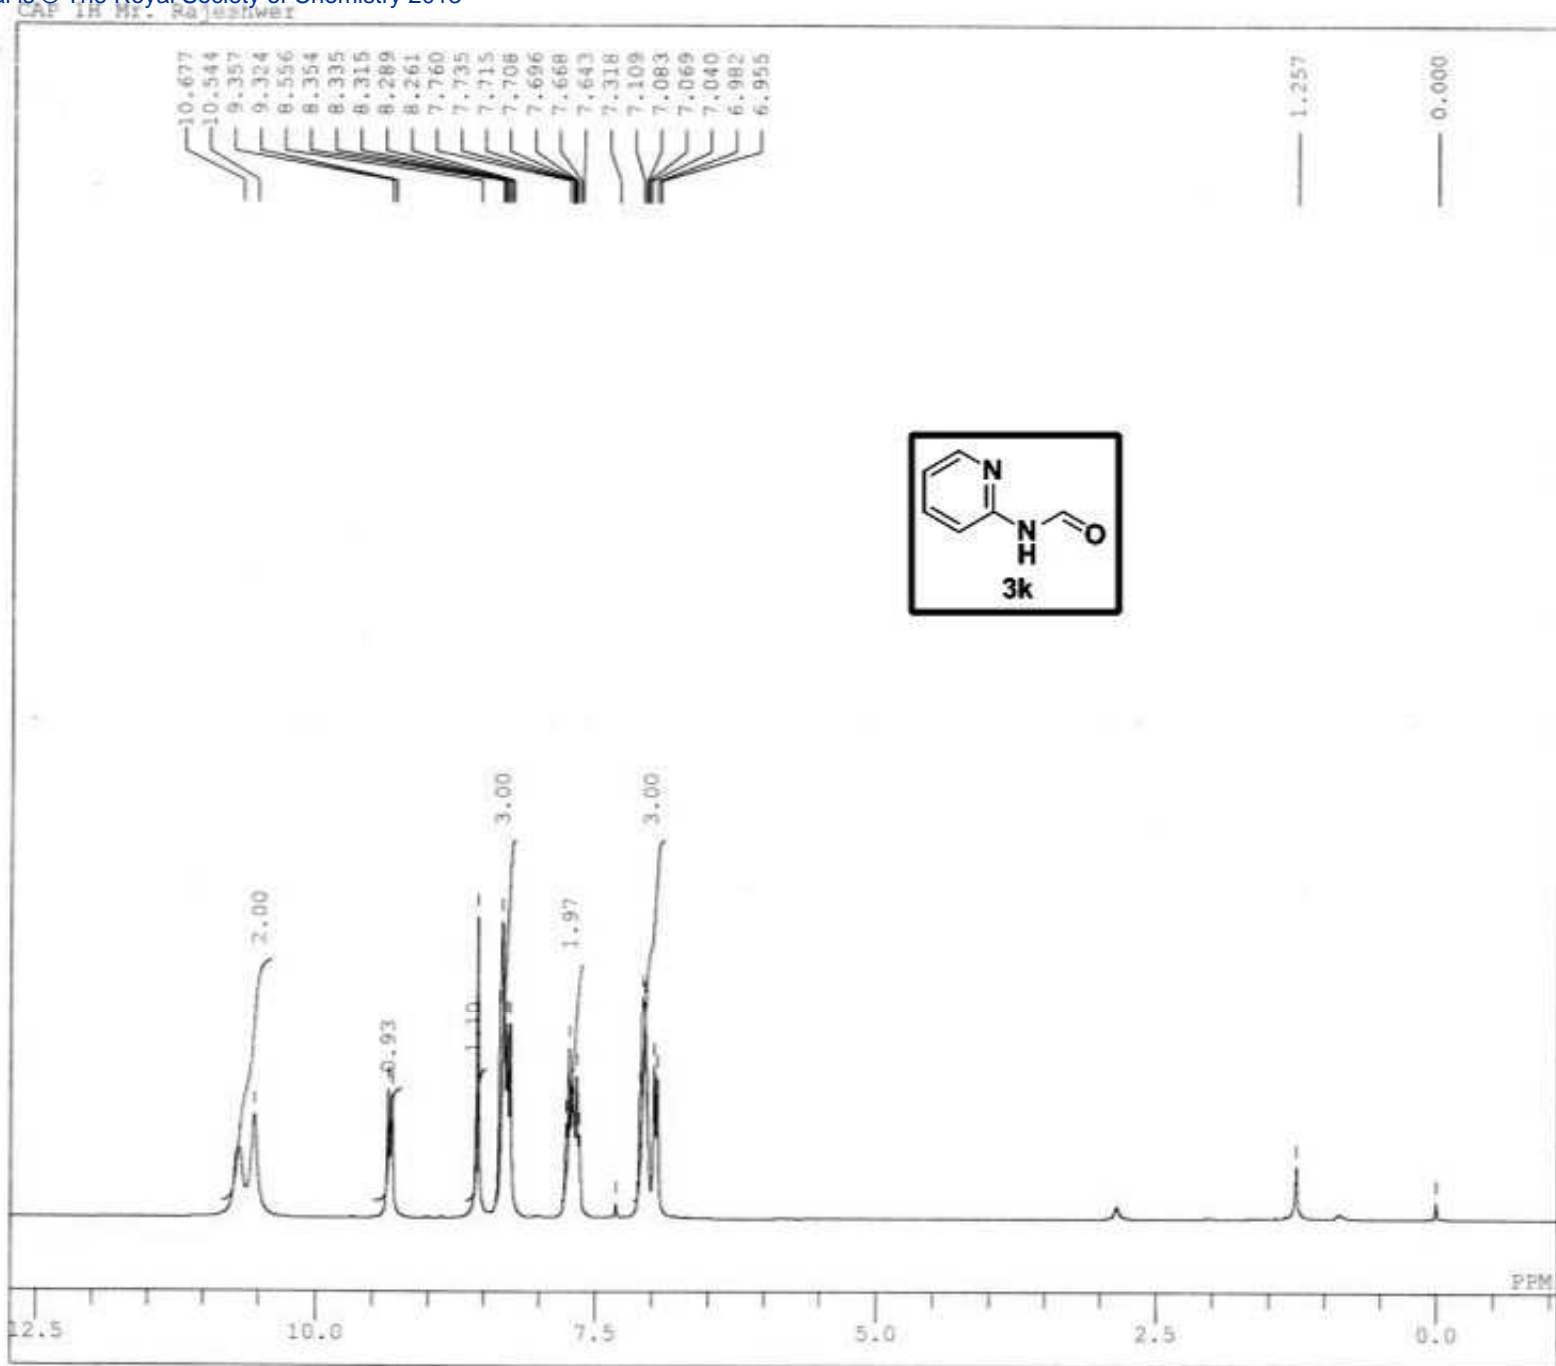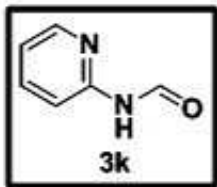

JEOL AL300 FTNMR  
CHEMISTRY DEPARTMENT  
Banaras Hindu University,  
VARANASI-221005

Operator : Nagendra Kumar  
Shishir Singh

DFILE C:\K.N. Singh,,I.T\CAP\_1H.al  
COMNT CAP\_1H Mr. Rajeshwer  
DATIM Mon Jul 02 12:12:26 2012  
OBNUC 1H  
EXMOD NON  
OBFRQ 300.40 MHz  
OBSET 130.00 KHz  
OBFIN 1150.0 Hz  
POINT 32768  
FREQU 9505.7 Hz  
SCANS 98  
ACQTM 3.447 sec  
PD 1.547 sec  
PW1 5.2 us  
IRNUC 1H  
CTEMP 20.9 c  
SLVNT CDCL3  
EXREF 0.00 ppm  
BF 1.20 Hz  
RGAIN 10

CAP 13C Mr. Rajeshwer

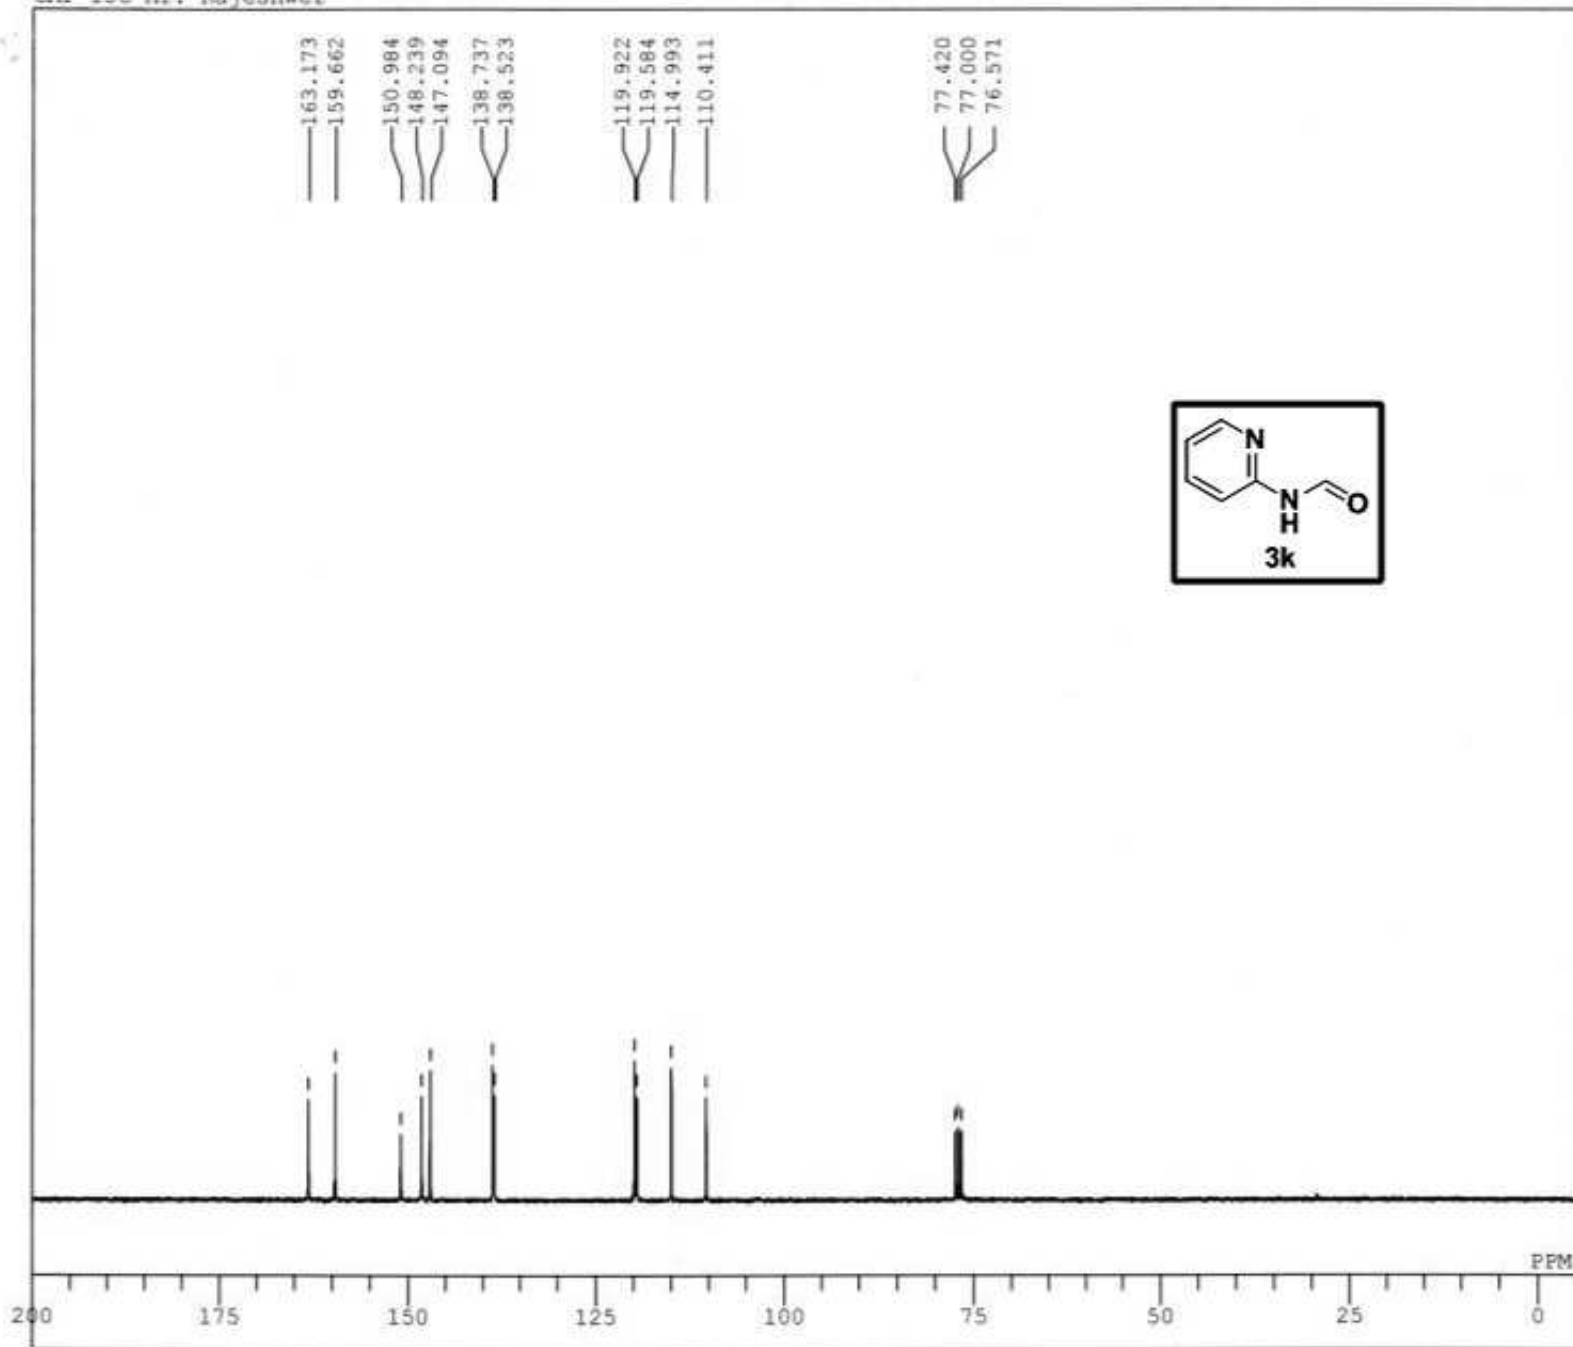

JEOL AL300 FTNMR  
CHEMISTRY DEPARTMENT  
Banaras Hindu University,  
VARANASI-221005

Operator : Nagendra Kumar  
Shishir Singh

DFILE C:\WINNMR98\COMMON\DEFAULT.  
COMT CAP\_13C\_Mr. Rajeshwer  
DATIM Mon Jul 02 12:33:01 2012  
OBNUC 13C  
EXMOD BCM  
OBFRQ 75.45 MHz  
OBSET 127.30 KHz  
OBFIN 44.7 Hz  
POINT 32768  
FREQU 20408.1 Hz  
SCANS 135  
ACQTM 1.606 sec  
PD 1.394 sec  
PW1 6.0 us  
IRNUC 1H  
CTEMP 20.5 c  
SLVNT CDCL3  
EXREF 77.00 ppm  
BF 1.20 Hz  
RGAIN 25

OBA\_13C\_Mr.Rajeshwar

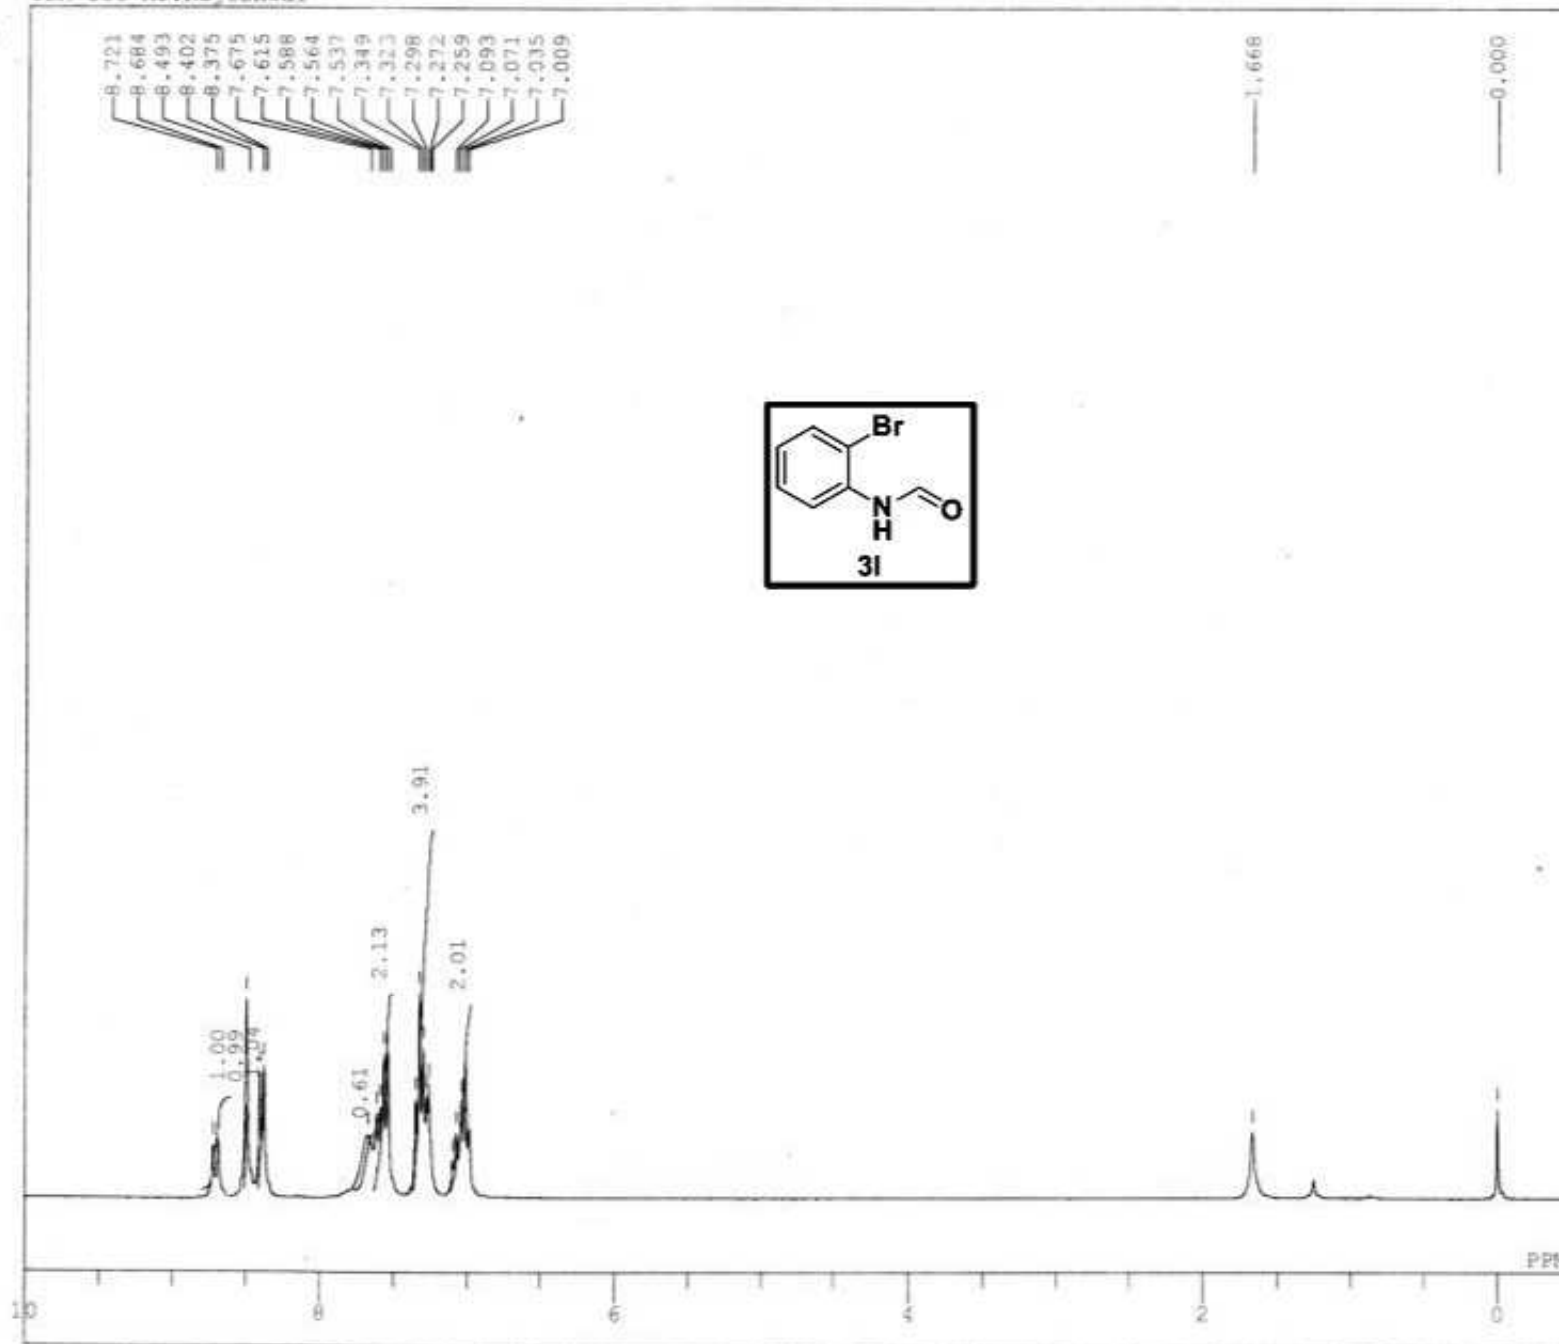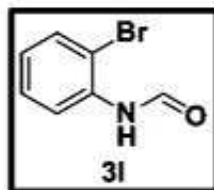

JEOL AL300 FTNMR  
CHEMISTRY DEPARTMENT  
Banaras Hindu University,  
VARANASI-221005

Operator : Nagendra Kumar  
Shishir Singh

DFILE C:\K.N. Singh,,I.T\OBA\_1H.a1  
COMNT OBA\_13C\_Mr.Rajeshwar  
DATIM Mon Sep 10 12:04:51 2012  
OBNUC 1H  
EXMOD NON  
OBFRQ 300.40 MHz  
OBSET 130.00 KHz  
OBFIN 1150.0 Hz  
POINT 32768  
FREQU 9505.7 Hz  
SCANS 16  
ACQTM 3.447 sec  
PD 1.547 sec  
PWI 5.2 us  
IRNUC 1H  
CTEMP 20.5 c  
SLVNT CDCl3  
EXREF 0.00 ppm  
BF 1.20 Hz  
RGAIN 18

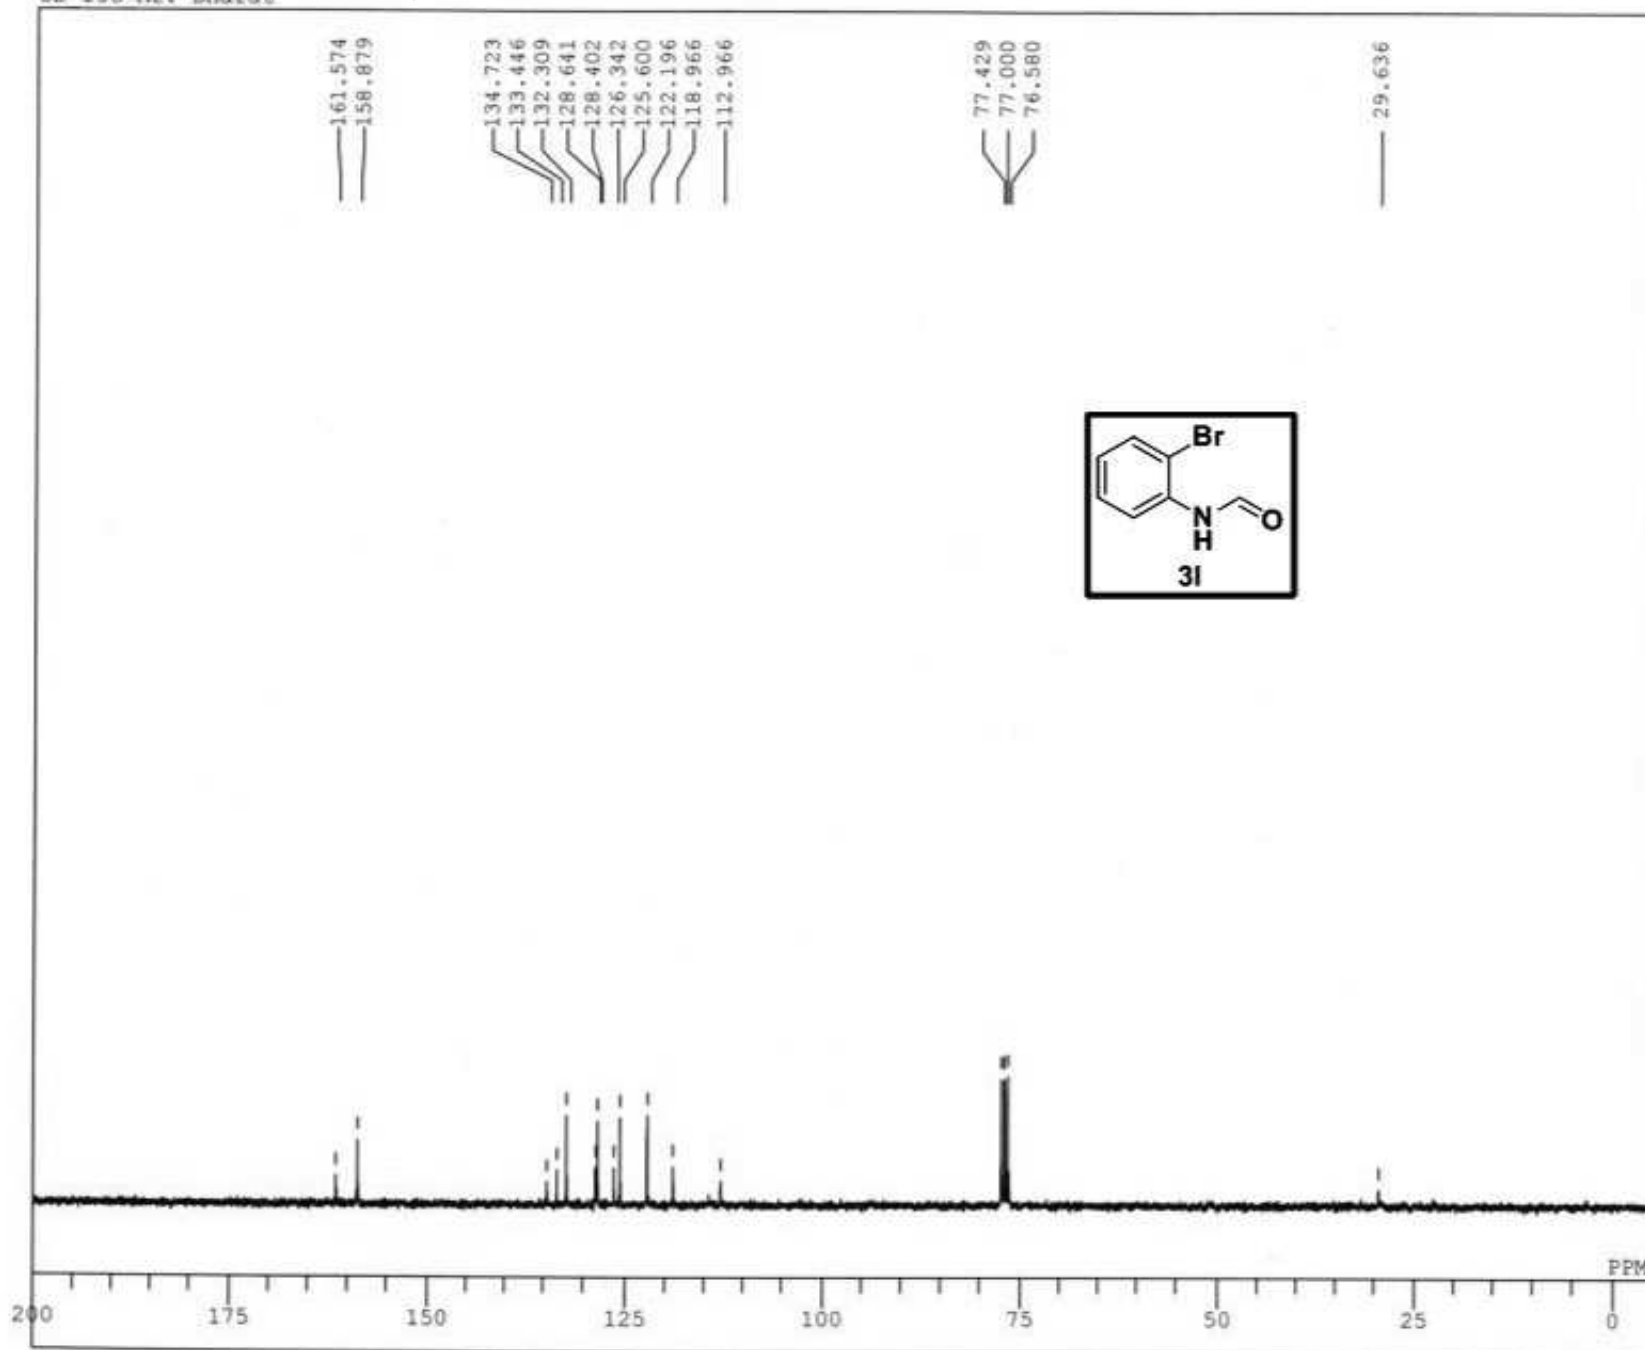

JEOL AL300 FTNMR  
CHEMISTRY DEPARTMENT  
Banaras Hindu University,  
VARANASI-221005

Operator : Nagendra Kumar  
Shishir Singh

DFILE C:\WINNMR98\COMMON\\_DEI  
COMNT OB\_13C\_Mr. Bharat  
DATIM Sat Dec 01 15:40:14 20:  
OBNUC 13C  
EXMOD BCM  
OBFRQ 75.45 MHz  
OBSET 127.30 KHz  
OBFIN 44.7 Hz  
POINT 32768  
FREQU 20408.1 Hz  
SCANS 171  
ACQTM 1.606 sec  
PD 1.394 sec  
PWI 6.0 us  
IRNUC 1H  
CTEMP 19.1 c  
SLVNT CDCL3  
EXREF 77.00 ppm  
BF 1.20 Hz  
RGAIN 25

EA.NCA 1H Mr.Manjeet Singh

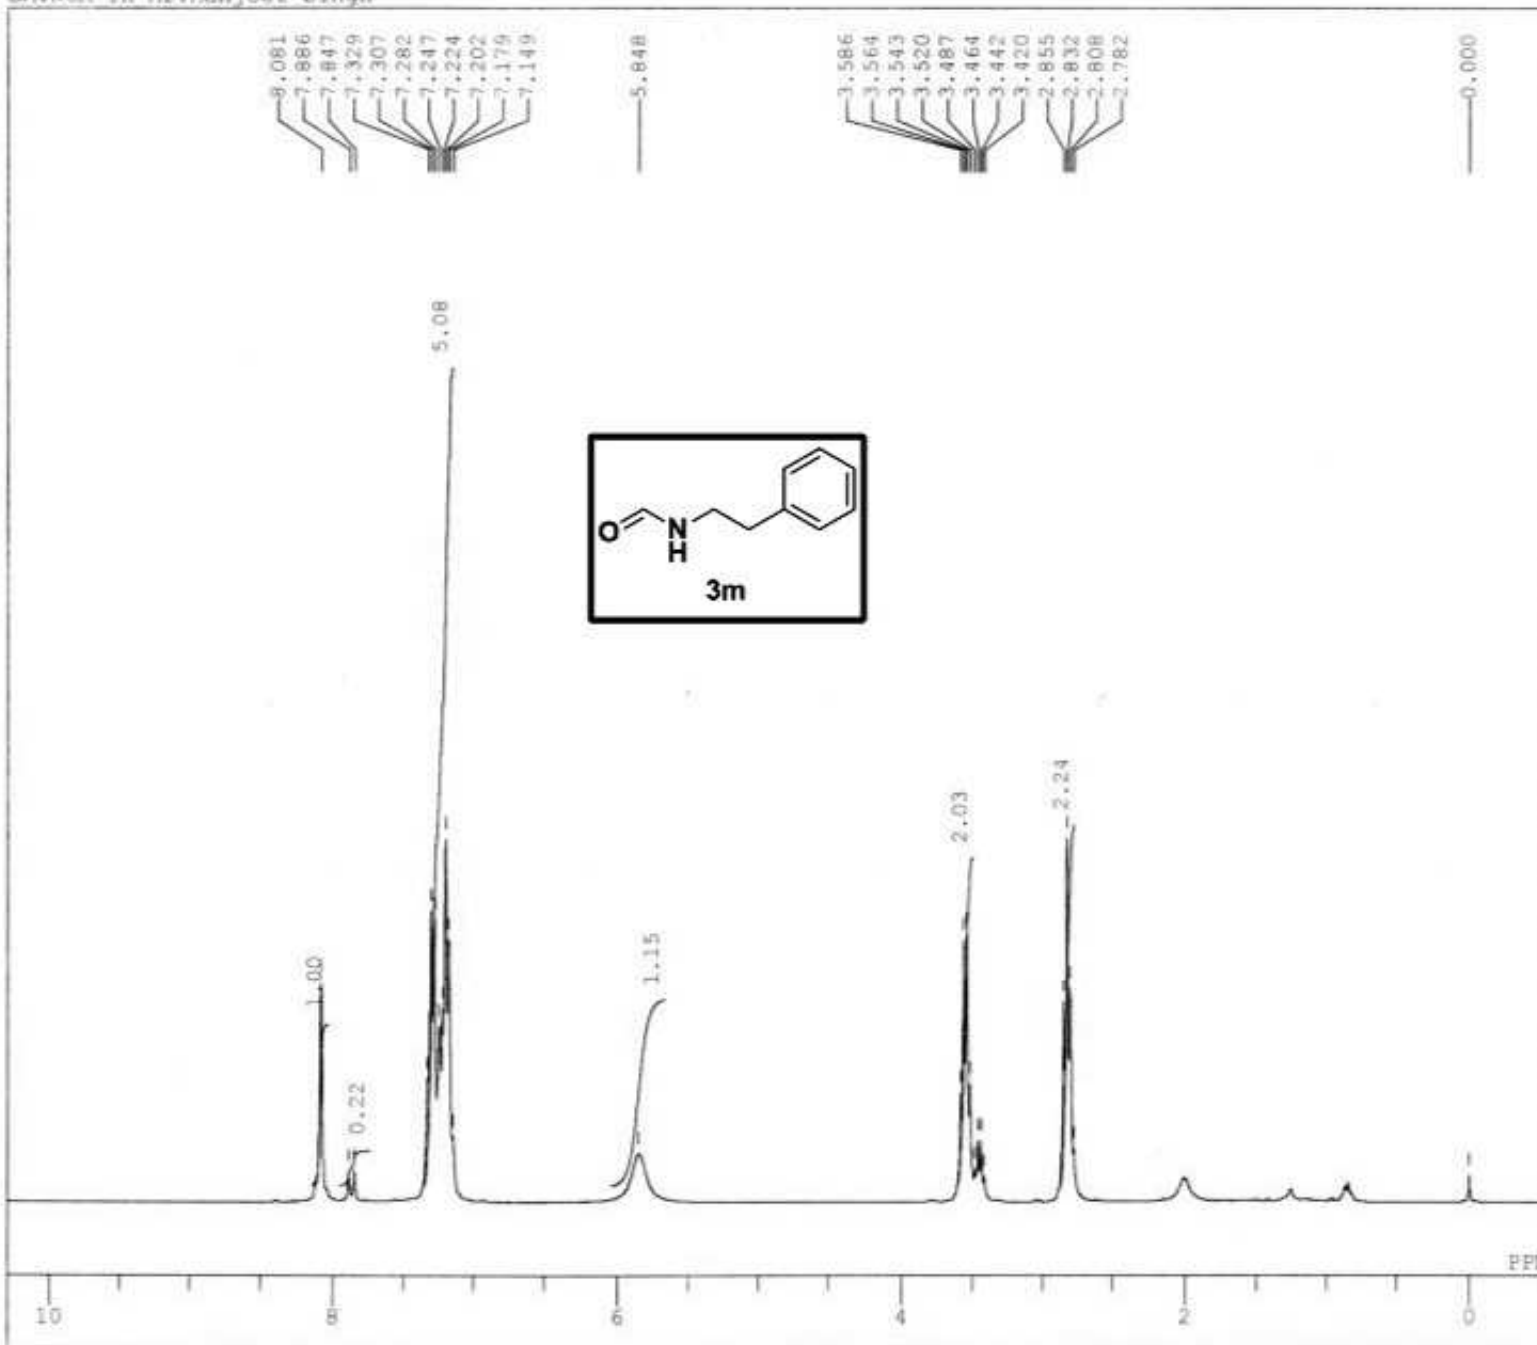

JEOL AL300 FTNMR  
CHEMISTRY DEPARTMENT  
Banaras Hindu University,  
VARANASI-221005

Operator : Nagendra Kumar  
Shishir Singh

DFILE C:\R.N. Rai\EA.NCA\_1H.als  
COMNT EA.NCA\_1H Mr.Manjeet Singh  
DATIM Wed Sep 12 13:04:21 2012  
OBNUC 1H  
EXMOD NON  
OBFRQ 300.40 MHz  
OBSET 130.00 KHz  
OBFIN 1150.0 Hz  
POINT 32768  
FREQU 9505.7 Hz  
SCANS 8  
ACQTM 3.447 sec  
PD 1.547 sec  
PWL 5.2 us  
IRNUC 1H  
CTEMP 22.5 c  
SLVNT CDCL3  
EXREF 0.00 ppm  
BF 1.20 Hz  
RGAIN 12

EA.NCA 13C Mr.Manjeet Singh

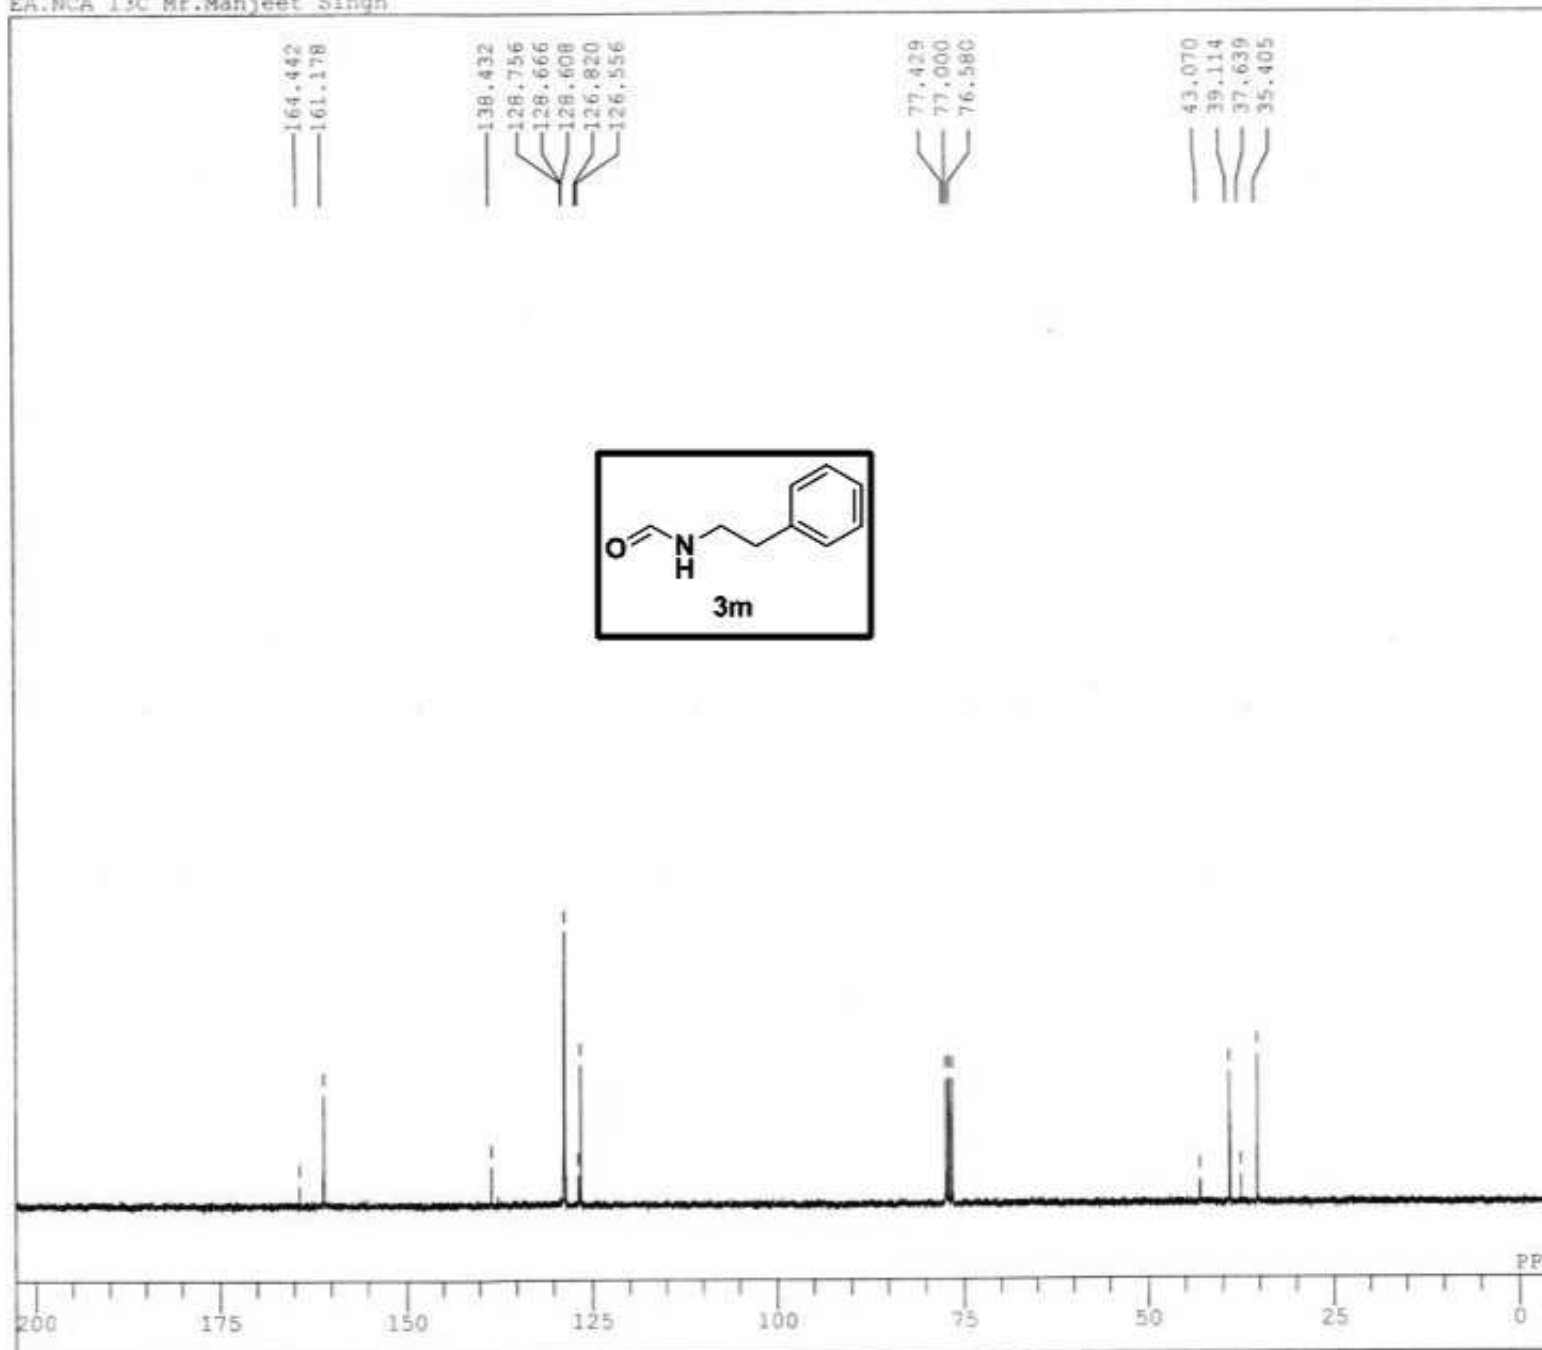

JEOL AL300 FTNMR  
CHEMISTRY DEPARTMENT  
Banaras Hindu University,  
VARANASI-221005

Operator : Naqendra Kumar  
Shishir Singh

DFILE C:\WINNMR98\COMMON\\_DEFAULT.  
COMNT EA.NCA 13C Mr.Manjeet Singh  
DATIM Wed Sep 12 12:59:21 2012  
OBNUC 13C  
EXMOD BCM  
OBFREQ 75.45 MHz  
OBSET 127.30 KHz  
OBFIN 44.7 Hz  
POINT 32768  
FREQU 20408.1 Hz  
SCANS 162  
ACQTM 1.606 sec  
PD 1.394 sec  
PW1 6.0 us  
IRNUC 1H  
CTEMP 20.7 c  
SLVNT CDCL3  
EXREF 77.00 ppm  
BF 1.20 Hz  
RGAIN 25

ACB\_13C\_Mr.Rajeshwar

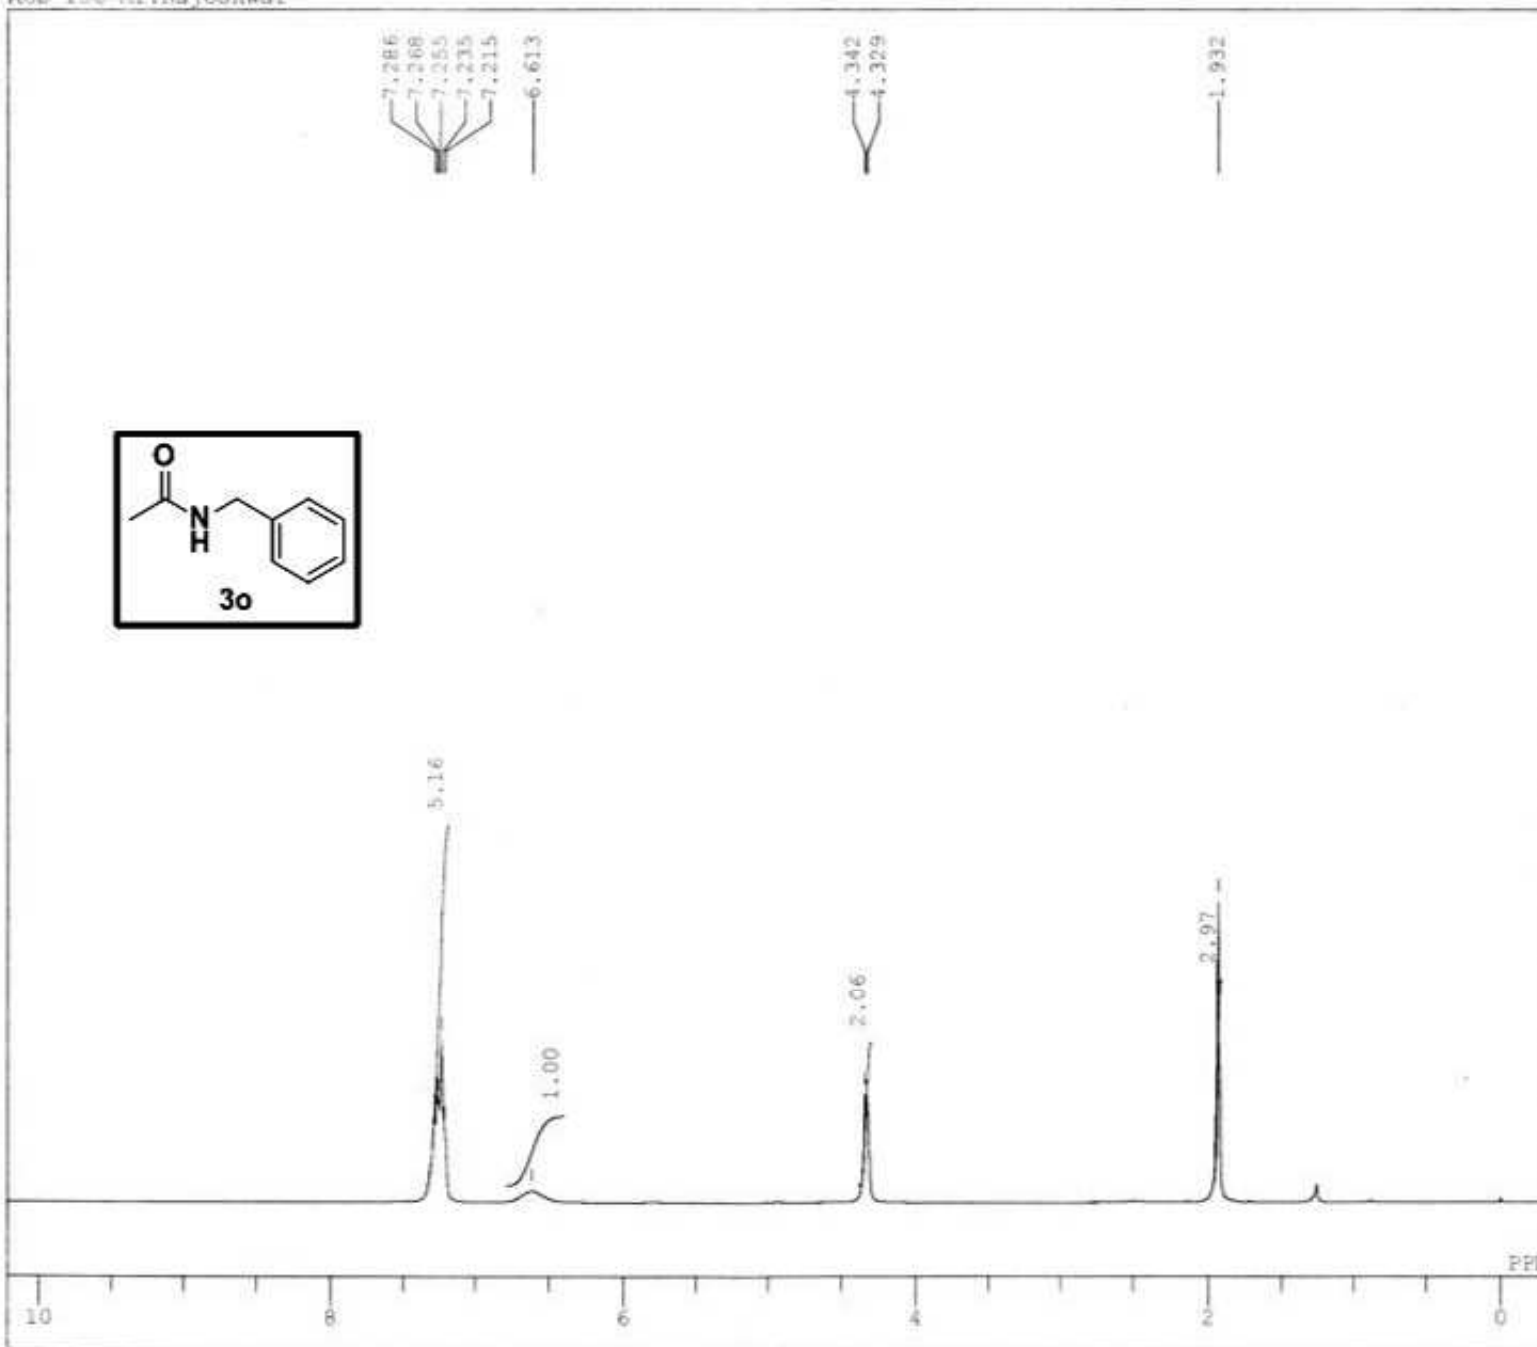

JEOL AL300 FTNMR  
CHEMISTRY DEPARTMENT  
Banaras Hindu University,  
VARANASI-221005

Operator : Nagendra Kumar  
Shishir Singh

DFILE C:\K.N. Singh,,I.T\ACB\_13C.e  
COMNT ACB\_13C\_Mr.Rajeshwar  
DATIM Fri Jul 06 16:13:43 2012  
OBNUC 1H  
EXMOD NON  
OBFRQ 300.40 MHz  
OBSET 130.00 KHz  
OBFIN 1150.0 Hz  
POINT 32768  
FREQU 6016.8 Hz  
SCANS 32  
ACQTM 5.446 sec  
PD 1.547 sec  
PW1 5.2 us  
IRNUC 1H  
CTEMP 20.1 c  
SLVNT CDCL3  
EXREF 0.00 ppm  
BF 0.12 Hz  
RGAIN 10

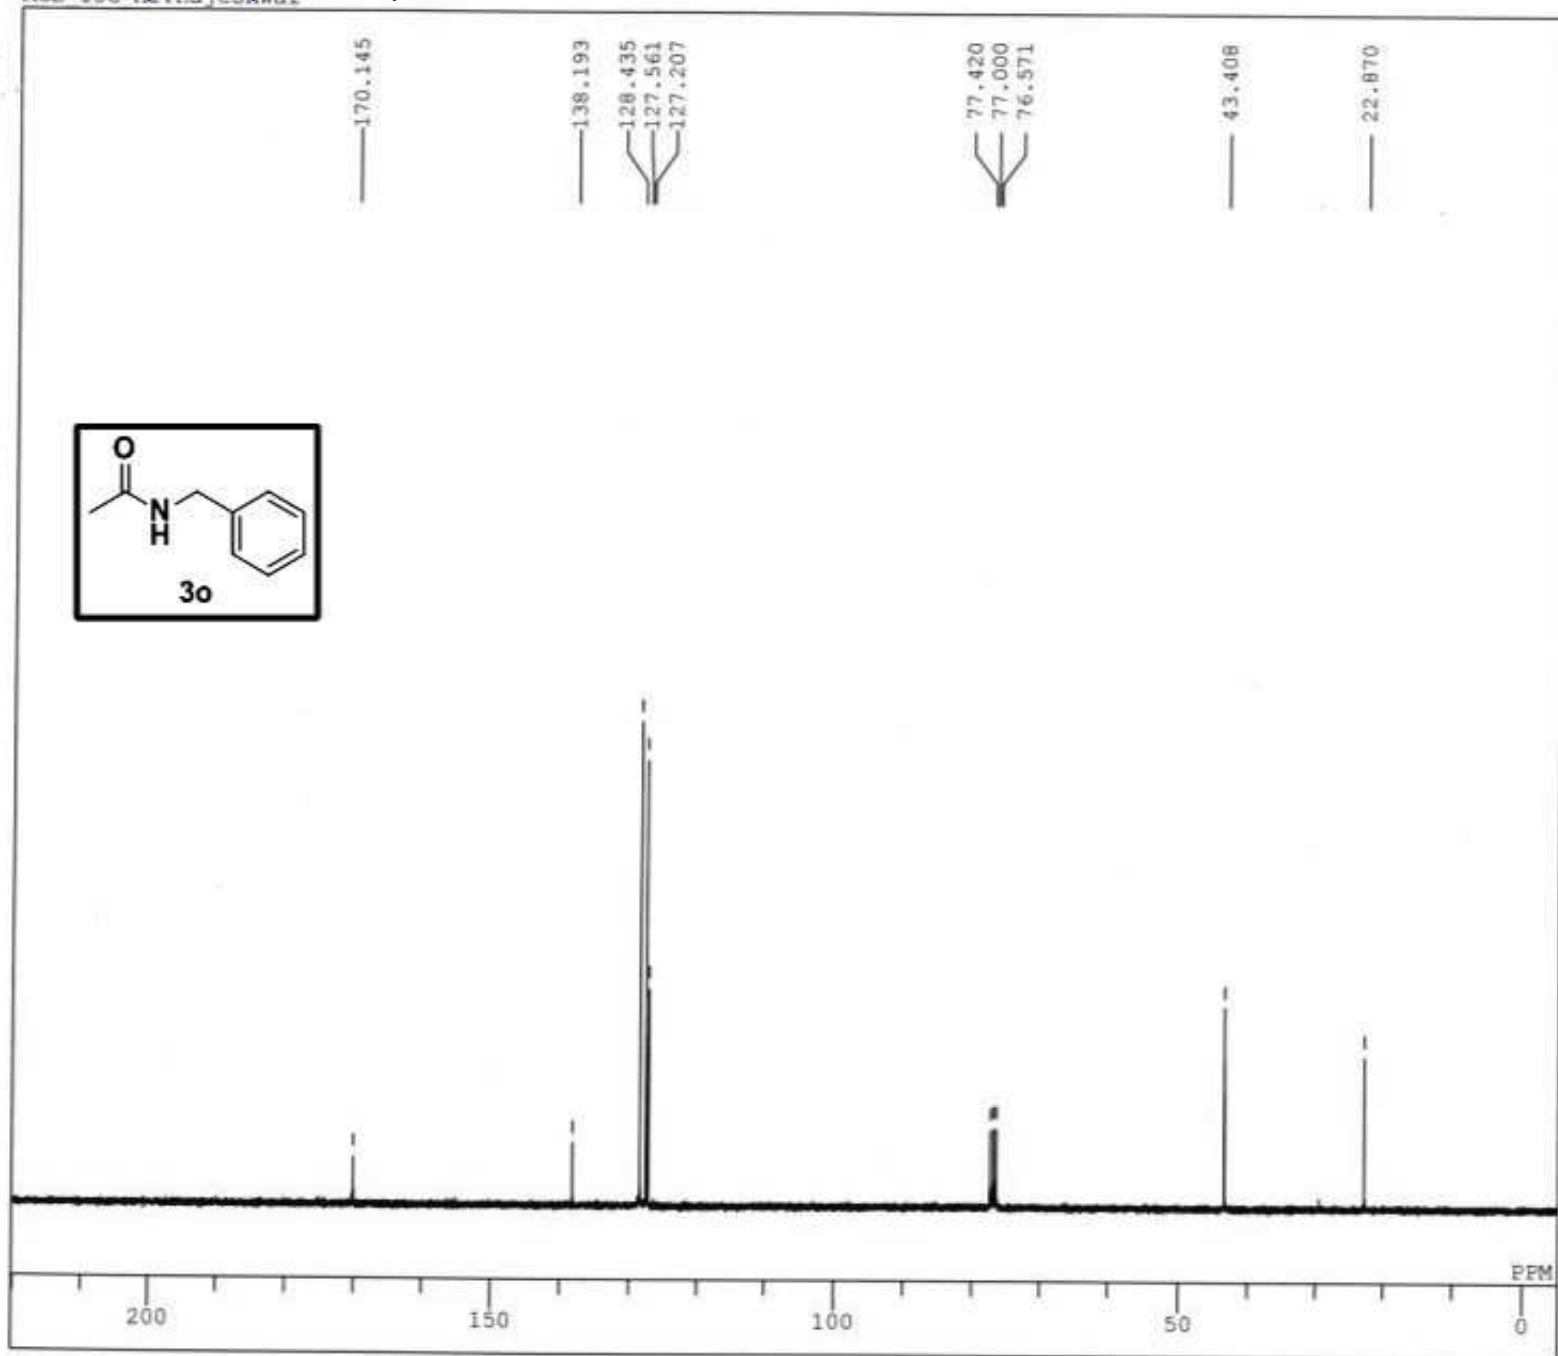

JEOL AL300 FTNMR  
CHEMISTRY DEPARTMENT  
Banaras Hindu University,  
VARANASI-221005

Operator : Nagendra Kumar  
Shishir Singh

DFILE C:\WINNMR98\Data\ACB\_13C2BCM  
COMNT ACB\_13C\_Mr.Rajeshwar  
DATIM Fri Jul 06 16:39:05 2012  
OBNUC 13C  
EXMOD BCM  
OBFRQ 75.45 MHz  
OBSET 127.30 KHz  
OBFIN 44.7 Hz  
POINT 32768  
FREQU 20408.1 Hz  
SCANS 500  
ACQTM 1.606 sec  
PD 1.394 sec  
PW1 6.0 us  
IRNUC 1H  
CTEMP 20.7 c  
SLVNT CDCL3  
EXREF 77.00 ppm  
BF 0.12 Hz  
RGAIN 25



C:\K.N. Singh,,I.T\CAC\_1H.als  
CAC\_1H Mr.Rajeshwar

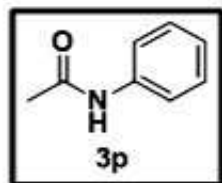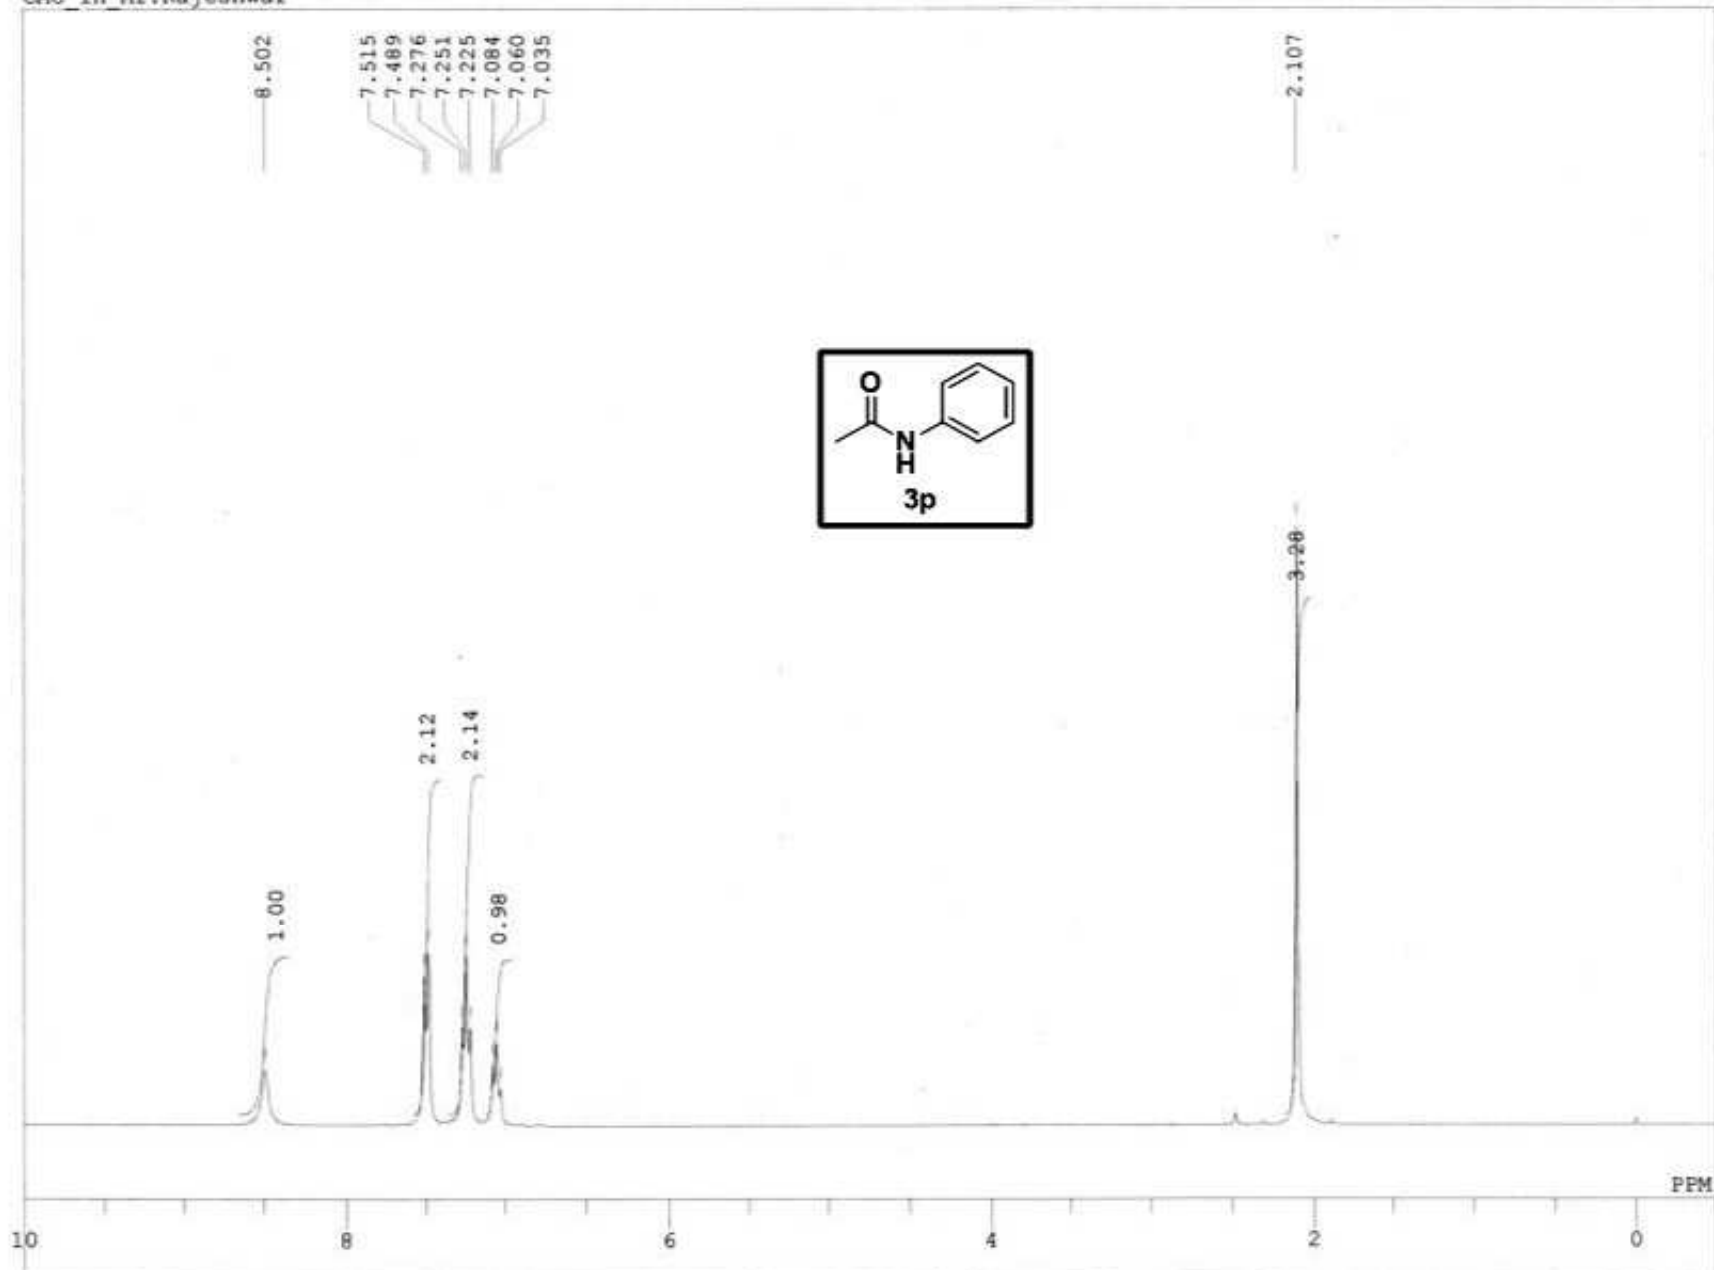

JEOL AL300 FTNMR  
CHEMISTRY DEPARTMENT  
Banaras Hindu University  
VARANASI-221005

Operator : Nagendra Kuma  
Shishir Singh

DFILE C:\K.N. Singh,,I.  
COMNT CAC\_1H Mr.Rajeshw.  
DATIM Tue Jun 26 16:15:  
OBNUC 1H  
EXMOD NON  
OBFRQ 300.40 MHz  
OBSET 130.00 KHz  
OBFIN 1150.0 Hz  
POINT 32768  
FREQU 9505.7 Hz  
SCANS 8  
ACQTM 3.447 sec  
PD 1.547 sec  
PW1 5.2 us  
IRNUC 1H  
CTEMP 21.7 c  
SLVNT CDCL3  
EXREF 0.00 ppm  
BF 1.20 Hz  
RGAIN 10

C:\K.N. Singh,,I.T\CAC\_13C.als  
CAC\_13C Mr. Rajeshwer

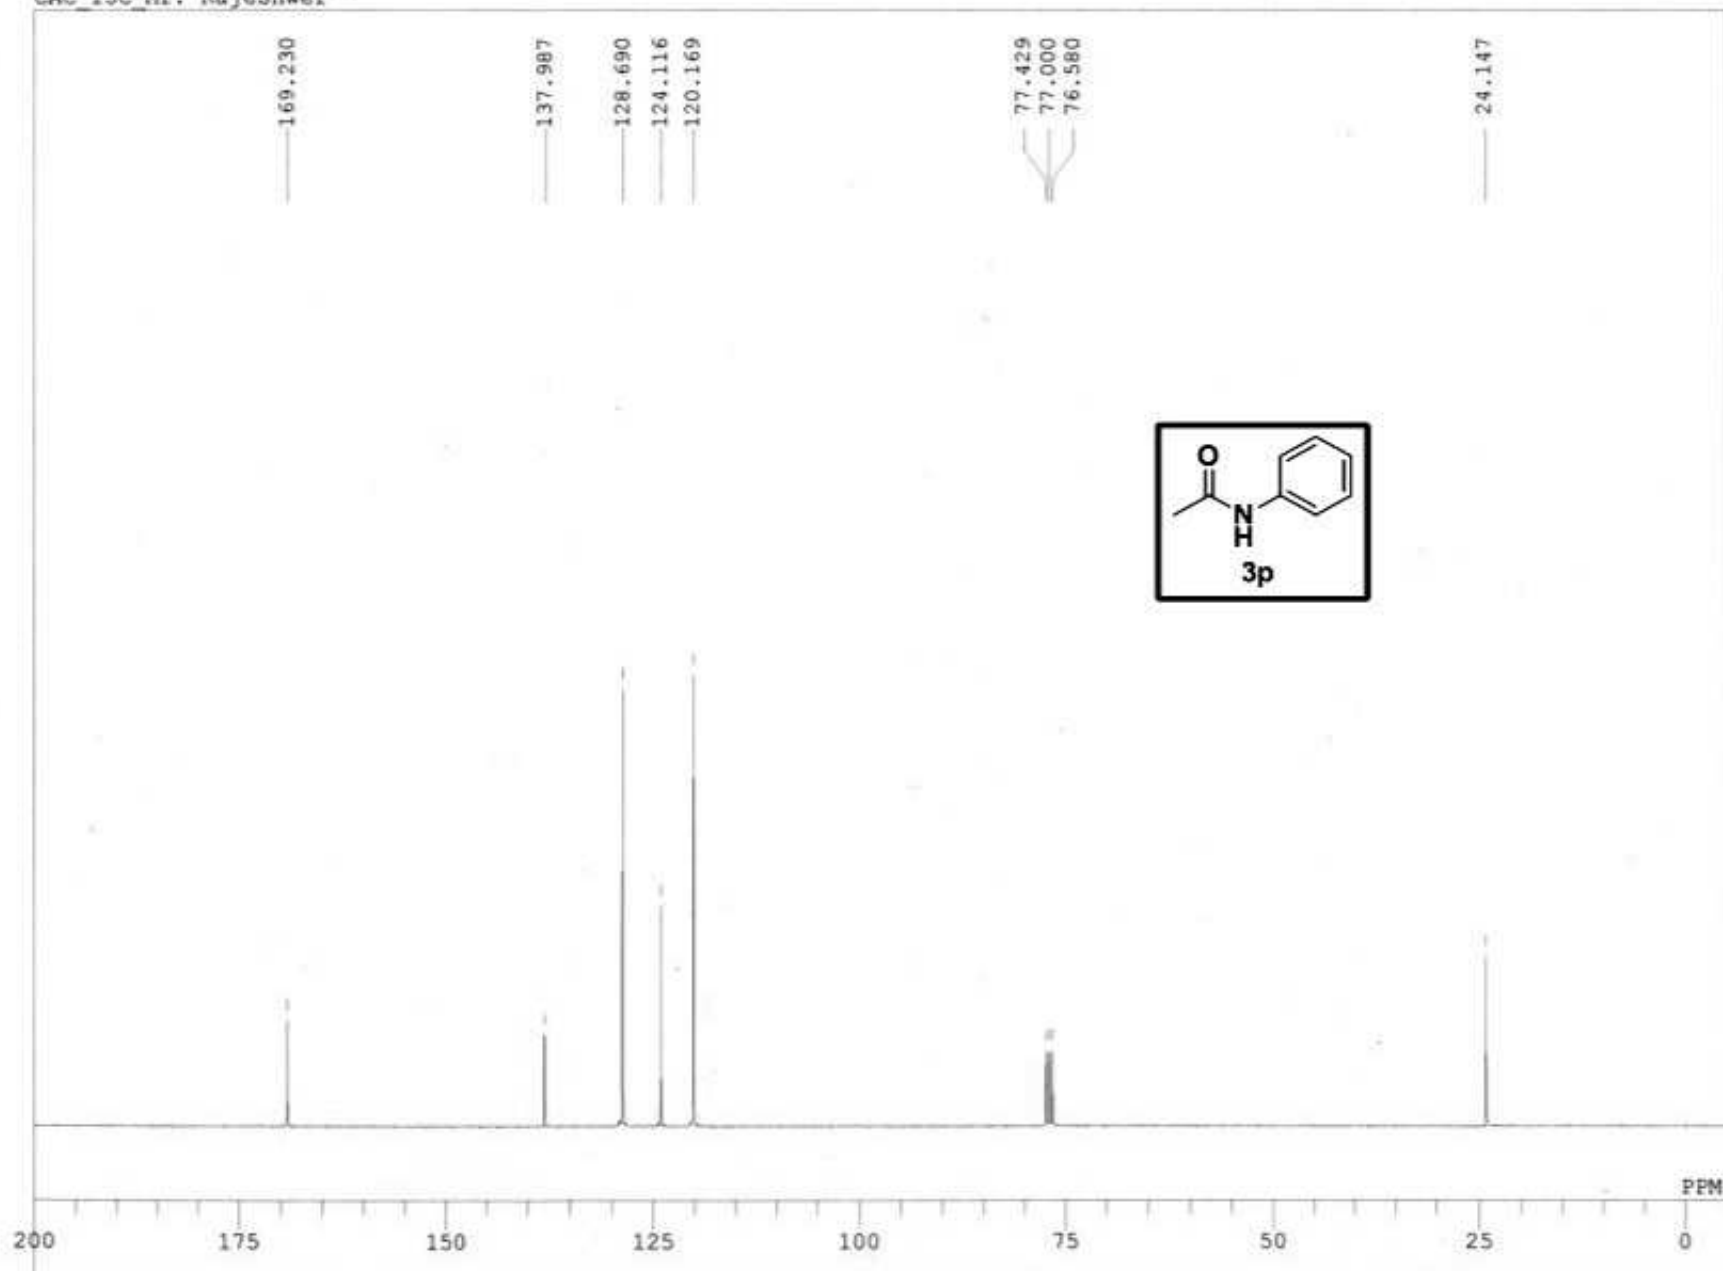

JEOL AL300 FNMNR  
CHEMISTRY DEPARTMENT  
Banaras Hindu University  
VARANASI-221005

Operator : Nagendra Kuma  
Shishir Singh

DFILE C:\K.N. Singh,,I.  
COMNT CAC\_13C\_Mr. Rajes  
DATIM Fri Jun 29 00:13:  
OBNUC 13C  
EXMOD BCM  
OBFRQ 75.45 MHz  
OBSET 127.30 KHz  
OBFIN 44.7 Hz  
POINT 32768  
FREQU 20408.1 Hz  
SCANS 3500  
ACQTM 1.606 sec  
PD 1.394 sec  
PW1 6.0 us  
IRNUC 1H  
CTEMP 19.7 c  
SLVNT CDCL3  
EXREF 77.00 ppm  
BF 1.20 Hz  
RGAIN 24

PC-AC 1H Mr. Rajeshwer

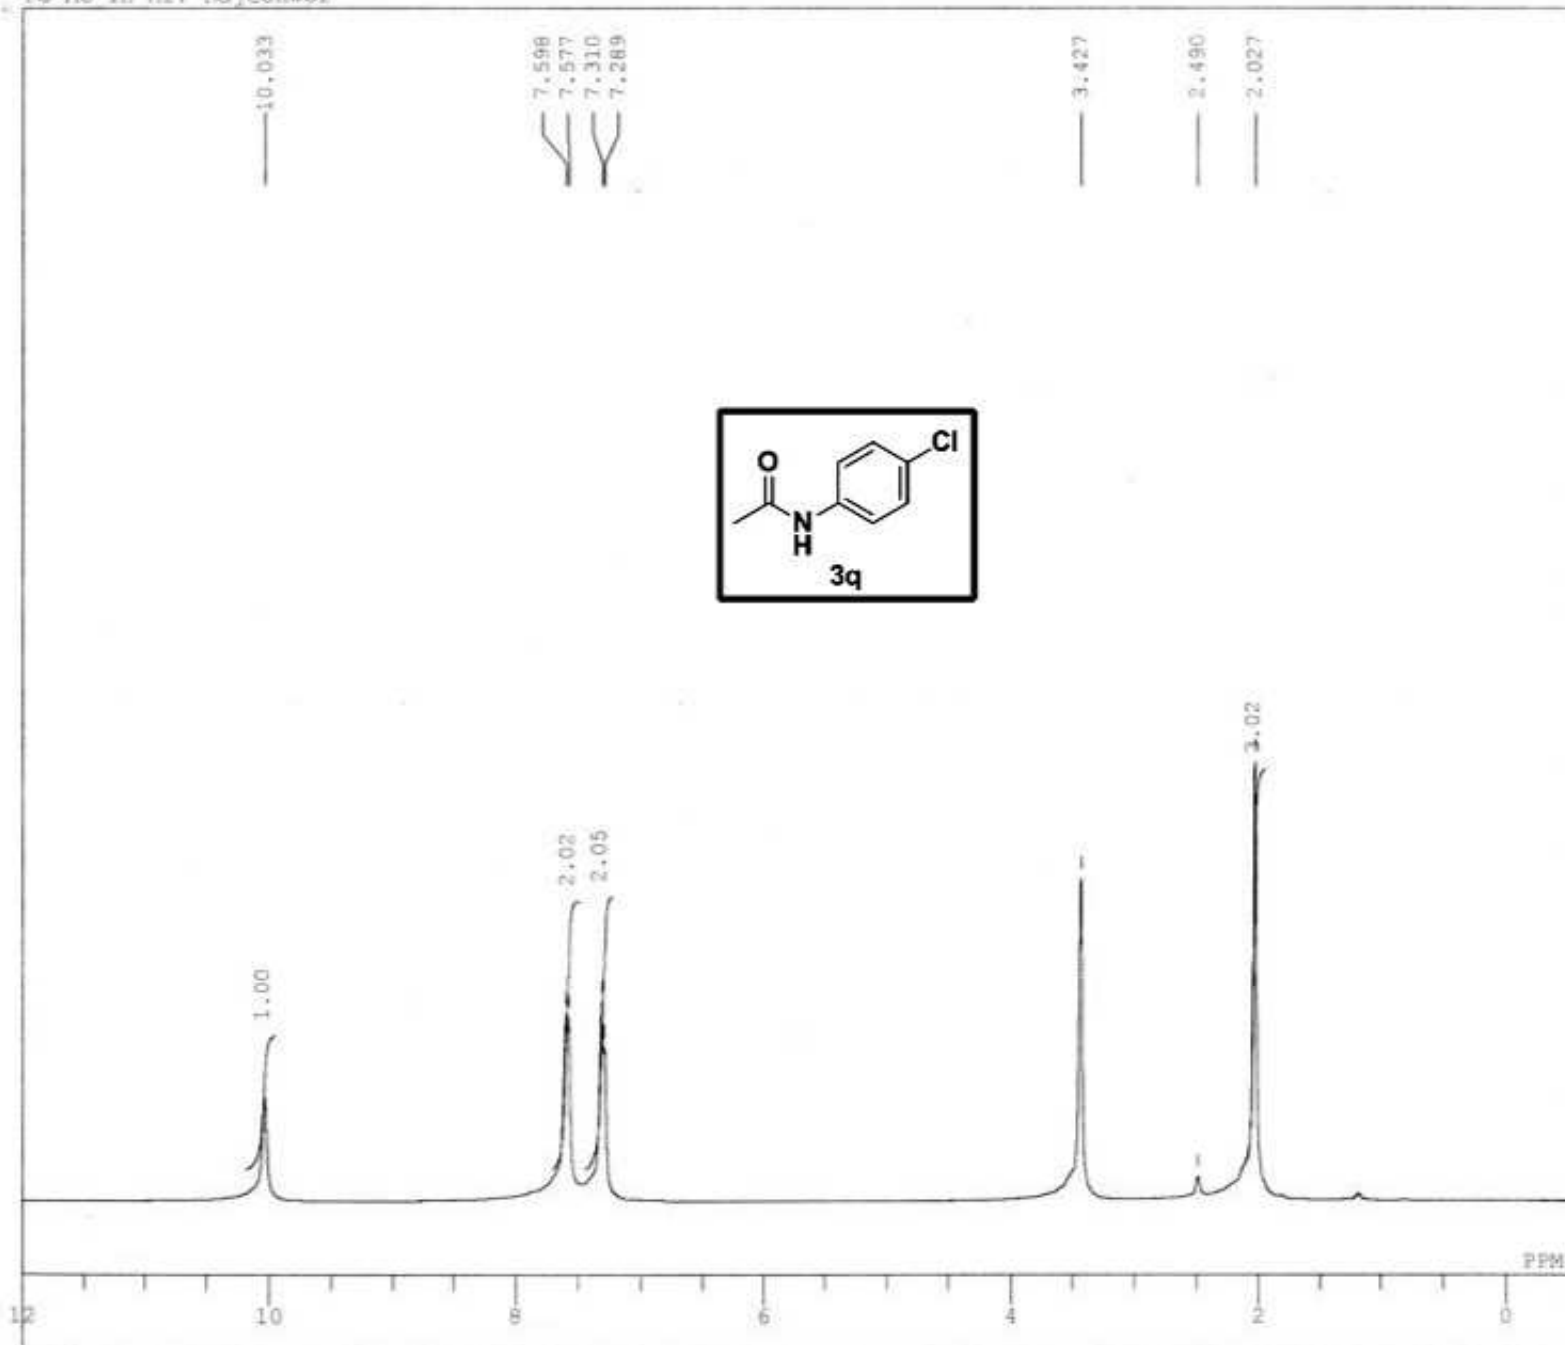

JEOL AL300 FTNMR  
CHEMISTRY DEPARTMENT  
Banaras Hindu University,  
VARANASI-221005

Operator : Nagendra Kumar  
Shishir Singh

DFILE C:\K.N. Singh,,I.T\PC-AC\_1H.  
COMNT PC-AC 1H Mr. Rajeshwer  
DATIM Sat Jul 28 10:58:39 2012  
OBNUC 1H  
EXMOD NON  
OBFRQ 300.40 MHz  
OBSET 130.00 KHz  
OBFIN 1150.0 Hz  
POINT 32768  
FREQU 9505.7 Hz  
SCANS 16  
ACQTM 3.447 sec  
PD 1.547 sec  
FW1 5.2 us  
IRNUC 1H  
CTEMP 22.5 c  
SLVNT DMSO  
EXREF 2.49 ppm  
BF 1.20 Hz  
RGAIN 11

PCAC 13C Mr. Rajeshwer

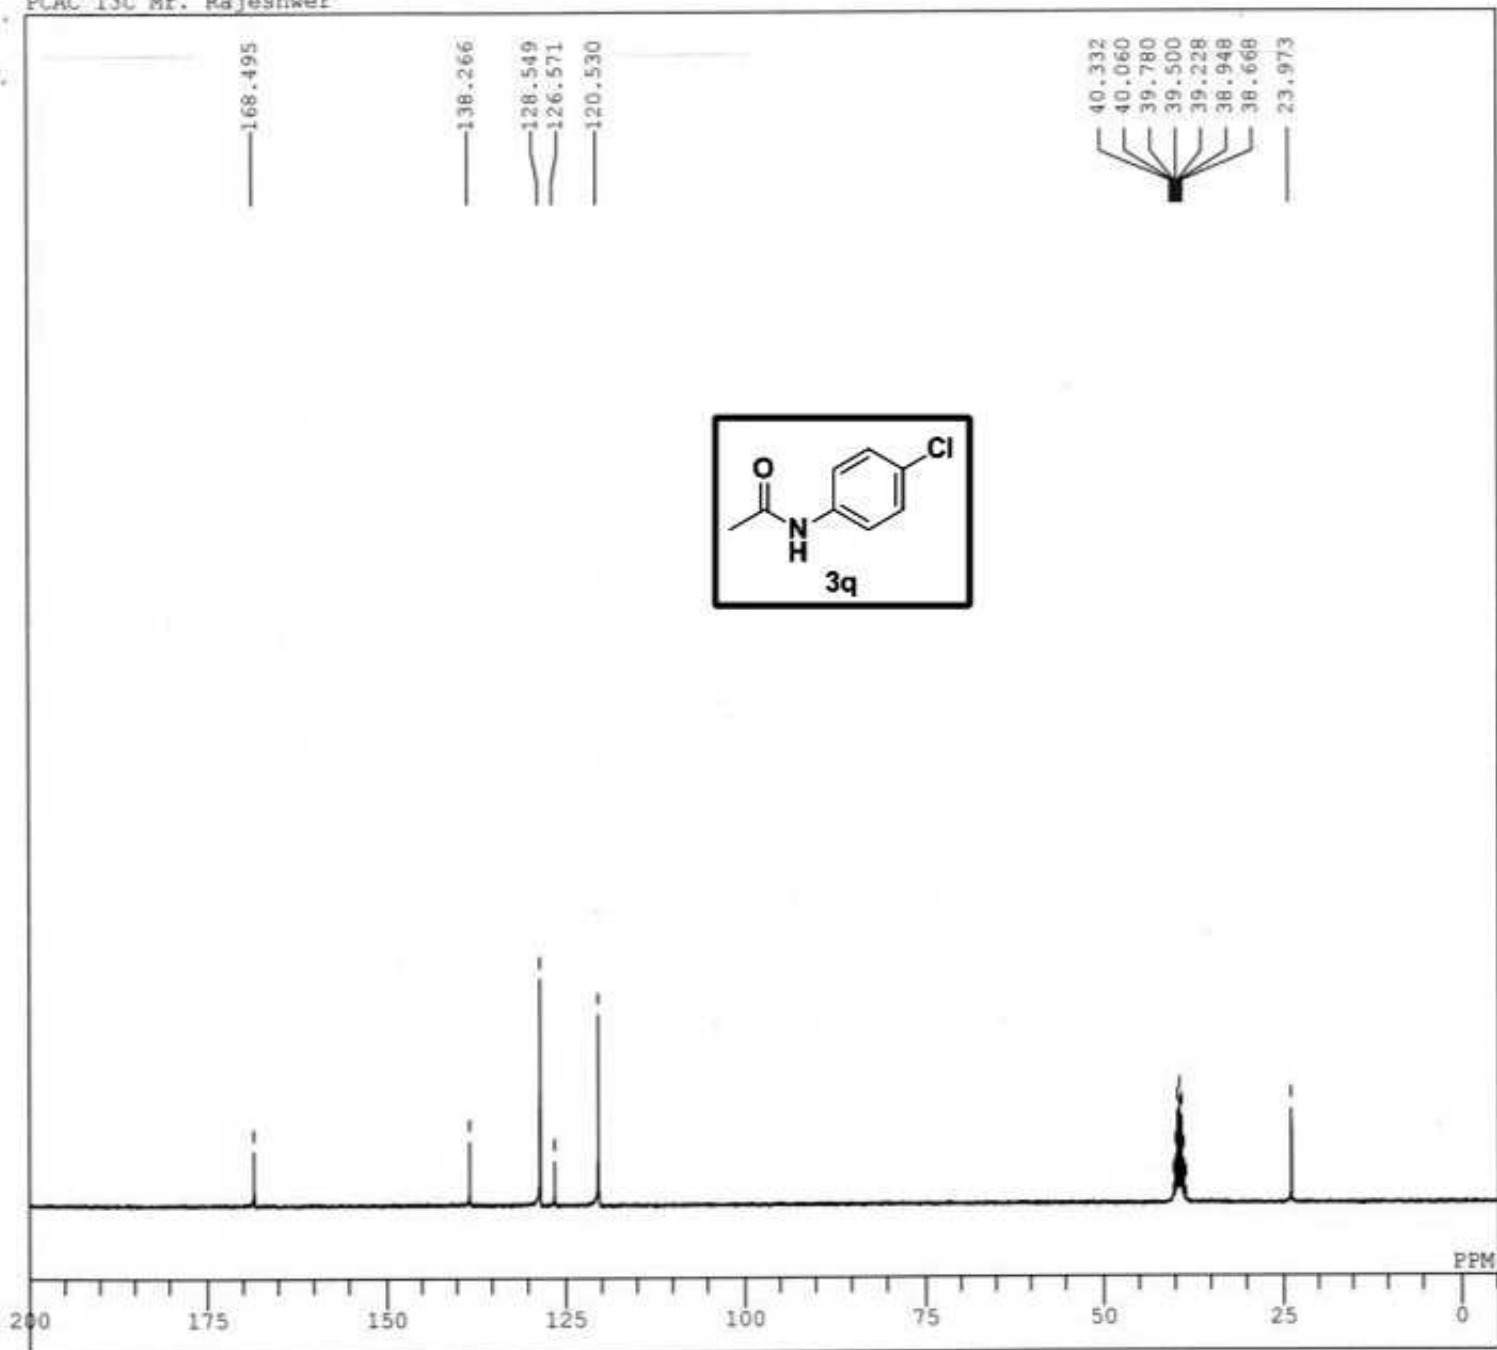

JEOL AL300 FTNMR  
CHEMISTRY DEPARTMENT  
Banaras Hindu University,  
VARANASI-221005

Operator : Nagendra Kumar  
Shishir Singh

DFILE C:\WINNMR98\COMMON\DEFAULT.ALS  
COMNT PCAC 13C Mr. Rajeshwer  
DATIM Sat Jul 28 11:45:18 2012  
OBNUC 13C  
EXMOD BCM  
OBFRQ 75.45 MHz  
OBSET 127.30 KHz  
OBFIN 44.7 Hz  
POINT 32768  
FREQU 20408.1 Hz  
SCANS 274  
ACQTM 1.606 sec  
PD 1.394 sec  
PWI 6.0 us  
IRNUC 1H  
CTEMP 21.9 c  
SLVNT DMSO  
EXREF 39.50 ppm  
BF 1.20 Hz  
RGAIN 23

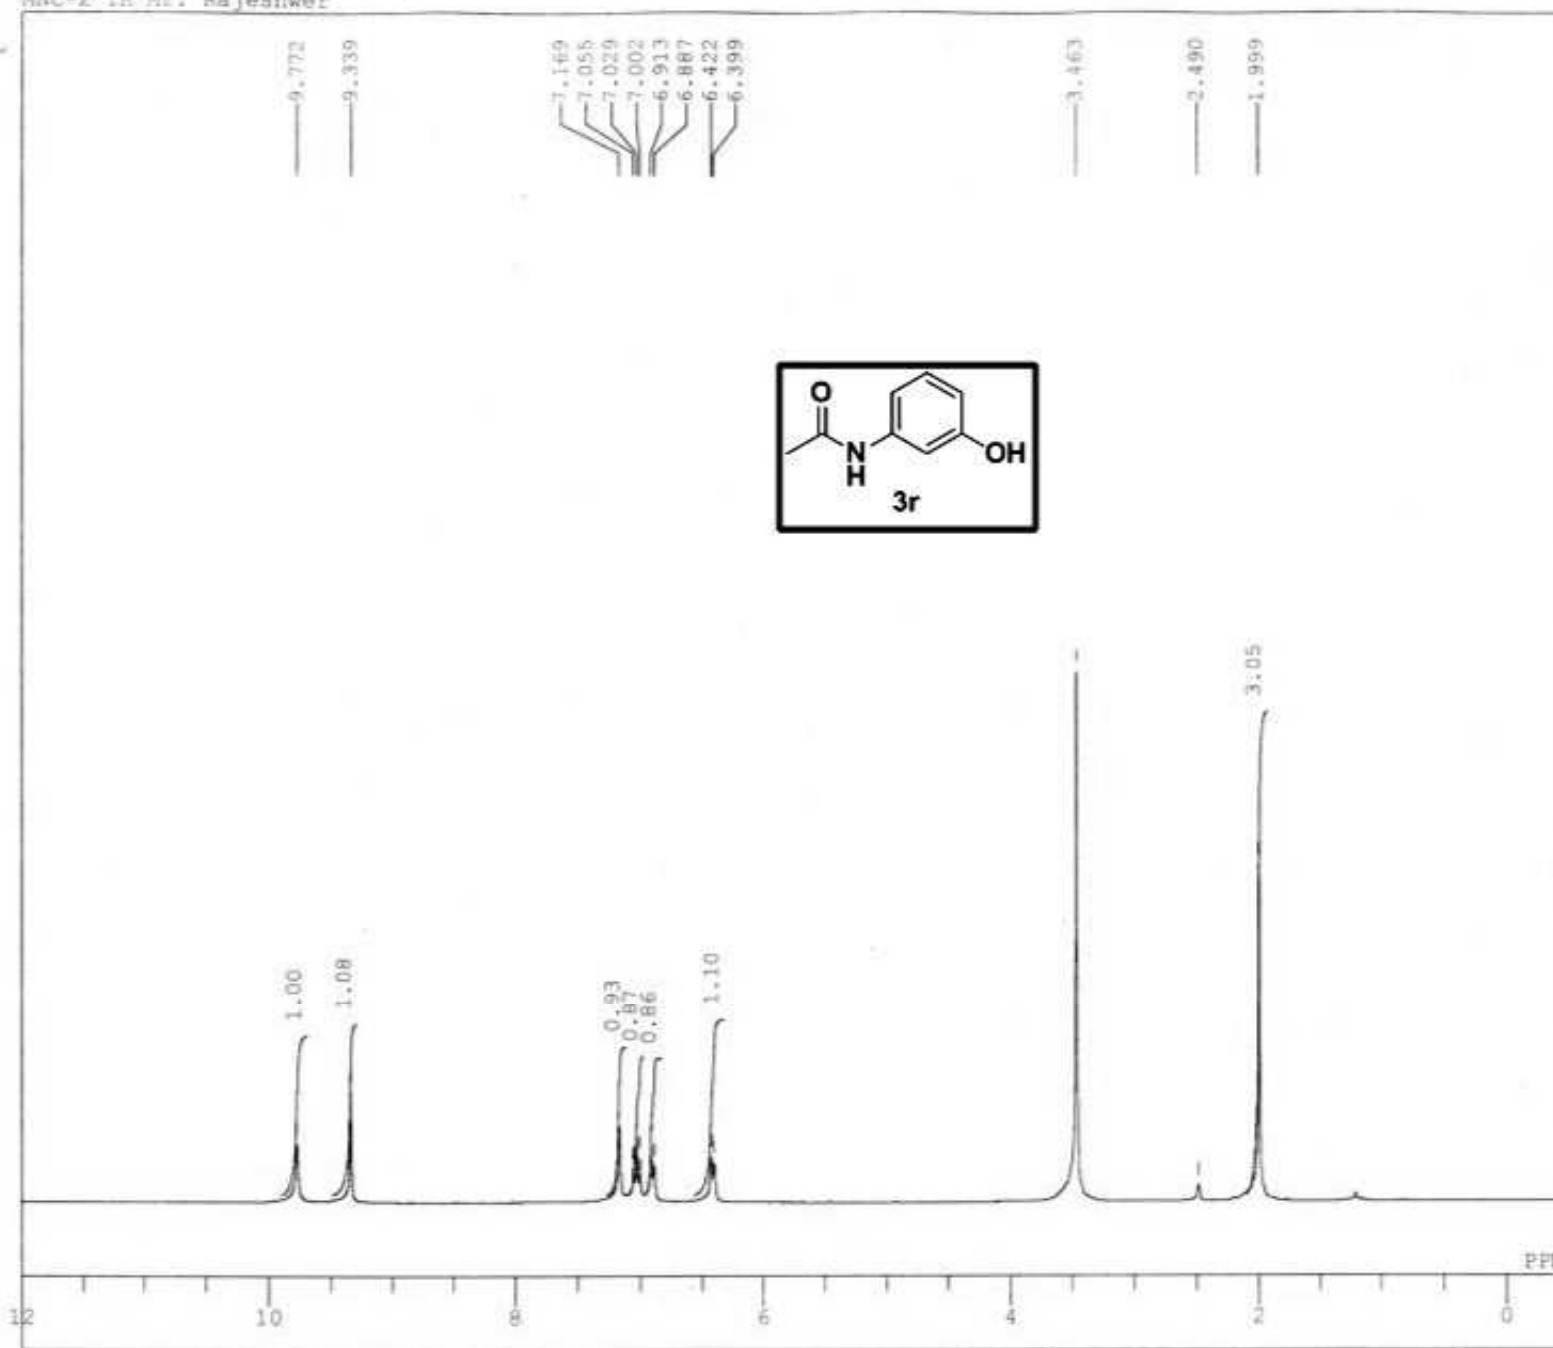

JEOL AL300 FTNMR  
CHEMISTRY DEPARTMENT  
Banaras Hindu University,  
VARANASI-221005

Operator : Nagendra Kumar  
Shishir Singh

DFILE C:\K.N. Singh,,I.TVMNC-2\_1H.  
COMNT MNC-2\_1H Mr. Rajeshwer  
DATIM Tue Jul 31 12:56:40 2012  
OBNUC 1H  
EXMOD NON  
OBFRQ 300.40 MHz  
OBSET 130.00 KHz  
OBFIN 1150.0 Hz  
POINT 32768  
FREQU 9505.7 Hz  
SCANS 16  
ACQTM 3.447 sec  
PD 1.547 sec  
PWI 5.2 us  
IRNUC 1H  
CTEMP 20.6 c  
SLVNT DMSO  
EXREF 2.49 ppm  
BF 1.20 Hz  
RGAIN 11

MNC-2 13C MR. Rajeshw...

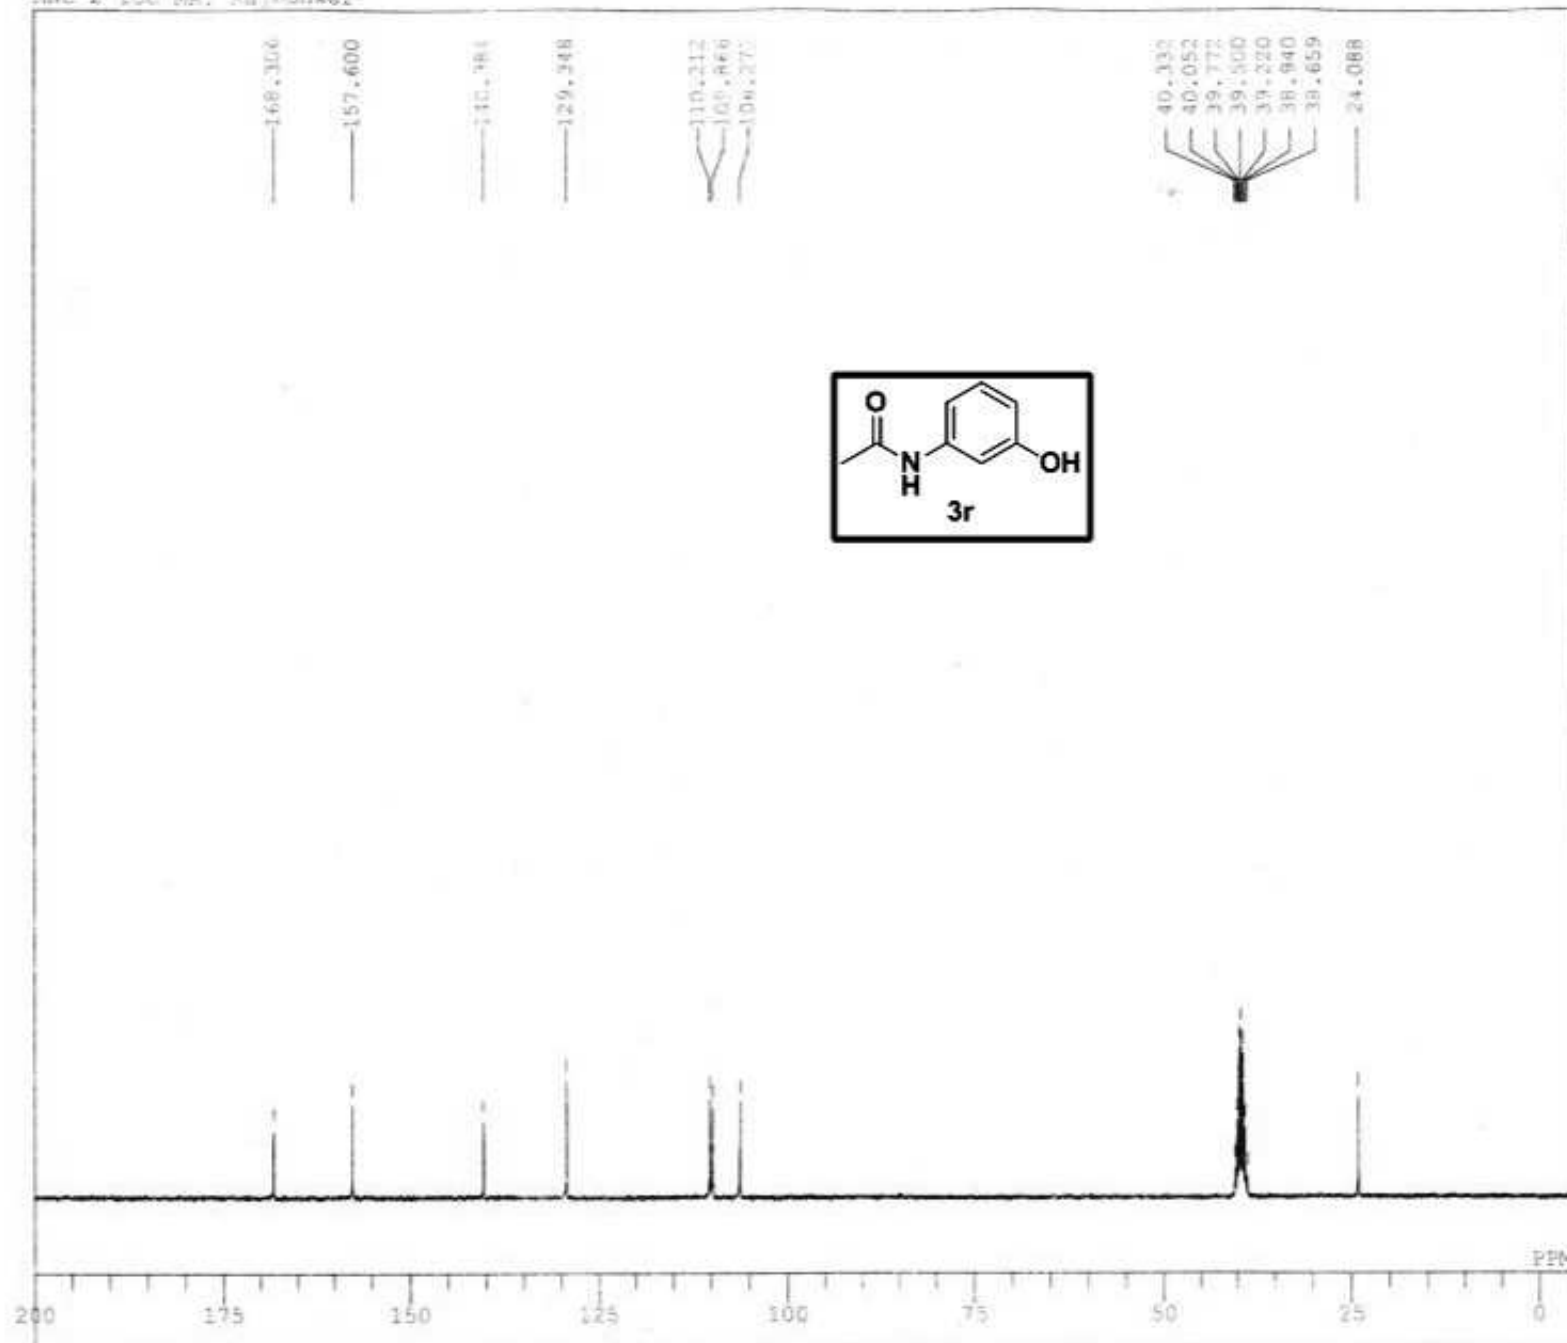

JEOL AL300 FTNMR  
CHEMISTRY DEPARTMENT  
Banaras Hindu University,  
VARANASI-221005

Operator : Nagendra Kumar  
Shishir Singh

DFILE C:\K.N. Singh, I.T\MB  
COMNT MNC-2 13C MR. Rajeshw  
DATIM Tue Jul 31 13:25:43  
OBNUC 13C  
EXMOD BCM  
OBFRQ 75.45 MHz  
OBSET 127.30 KHz  
OBFIN 44.7 Hz  
POINT 32768  
FREQU 20408.1 Hz  
SCANS 277  
ACQTM 1.406 sec  
PD 1.394 sec  
PWL 8.0 us  
IRNUC 1H  
CTEMP 23.5 c  
SLVNT DMSO  
EXREF 39.50 ppm  
BF 1.20 Hz  
RGAIN 22

PTA 1H Mr. Rajeshwer

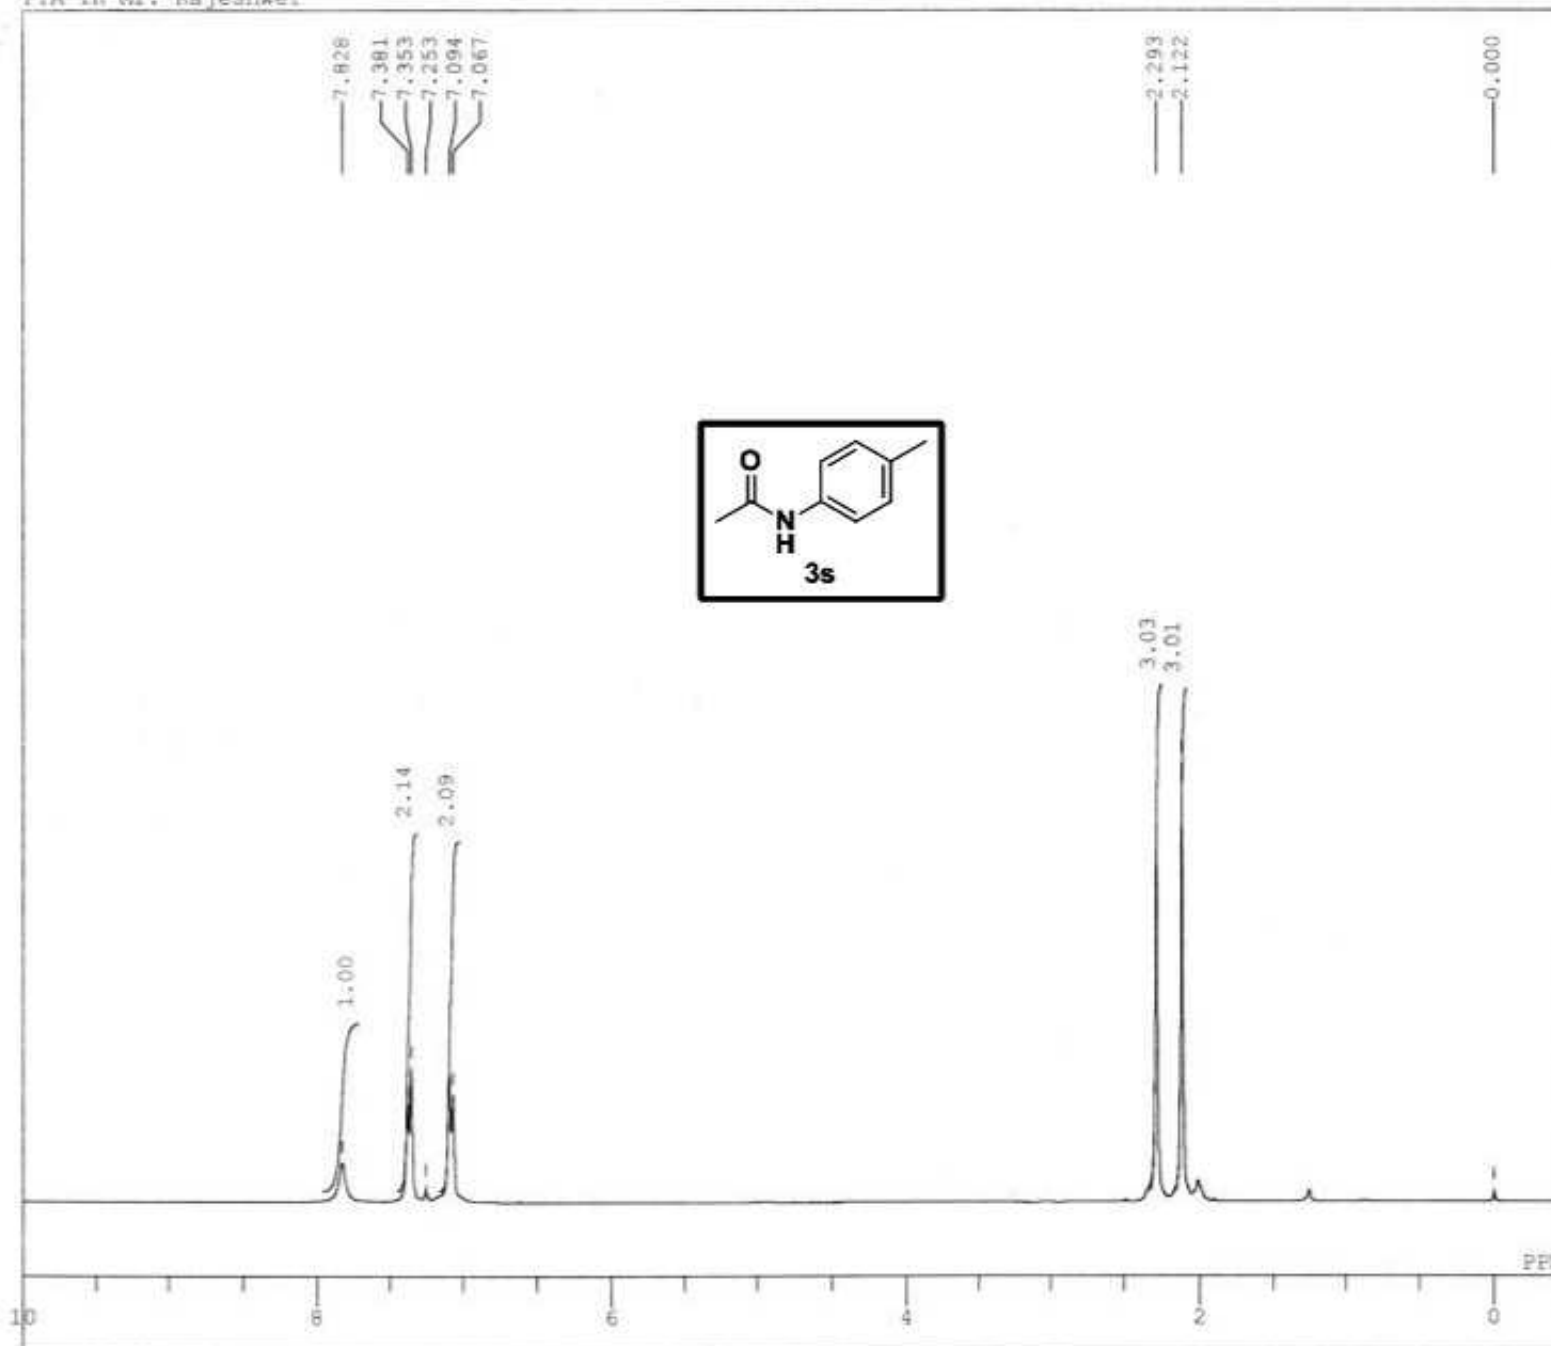

JEOL AL300 FTNMR  
CHEMISTRY DEPARTMENT  
Banaras Hindu University,  
VARANASI-221005

Operator : Nagendra Kumar  
Shishir Singh

DFILE C:\K.N. Singh,,I.T\PTA\_1H.a1  
COMNT PTA\_1H Mr. Rajeshwer  
DATIM Tue Jul 17 12:02:15 2012  
GBNUC 1H  
EXMOD NON  
GBFRQ 300.40 MHz  
GBSET 130.00 KHz  
GBFIN 1150.0 Hz  
POINT 32768  
FREQU 9505.7 Hz  
SCANS 67  
ACQTM 3.447 sec  
PD 1.547 sec  
PW1 5.2 us  
IRNUC 1H  
CTEMP 18.1 c  
SLVNT CDCL3  
EXREF 0.00 ppm  
BF 1.20 Hz  
RGAIN -12

PTA 13C Mr.Rajeshwar

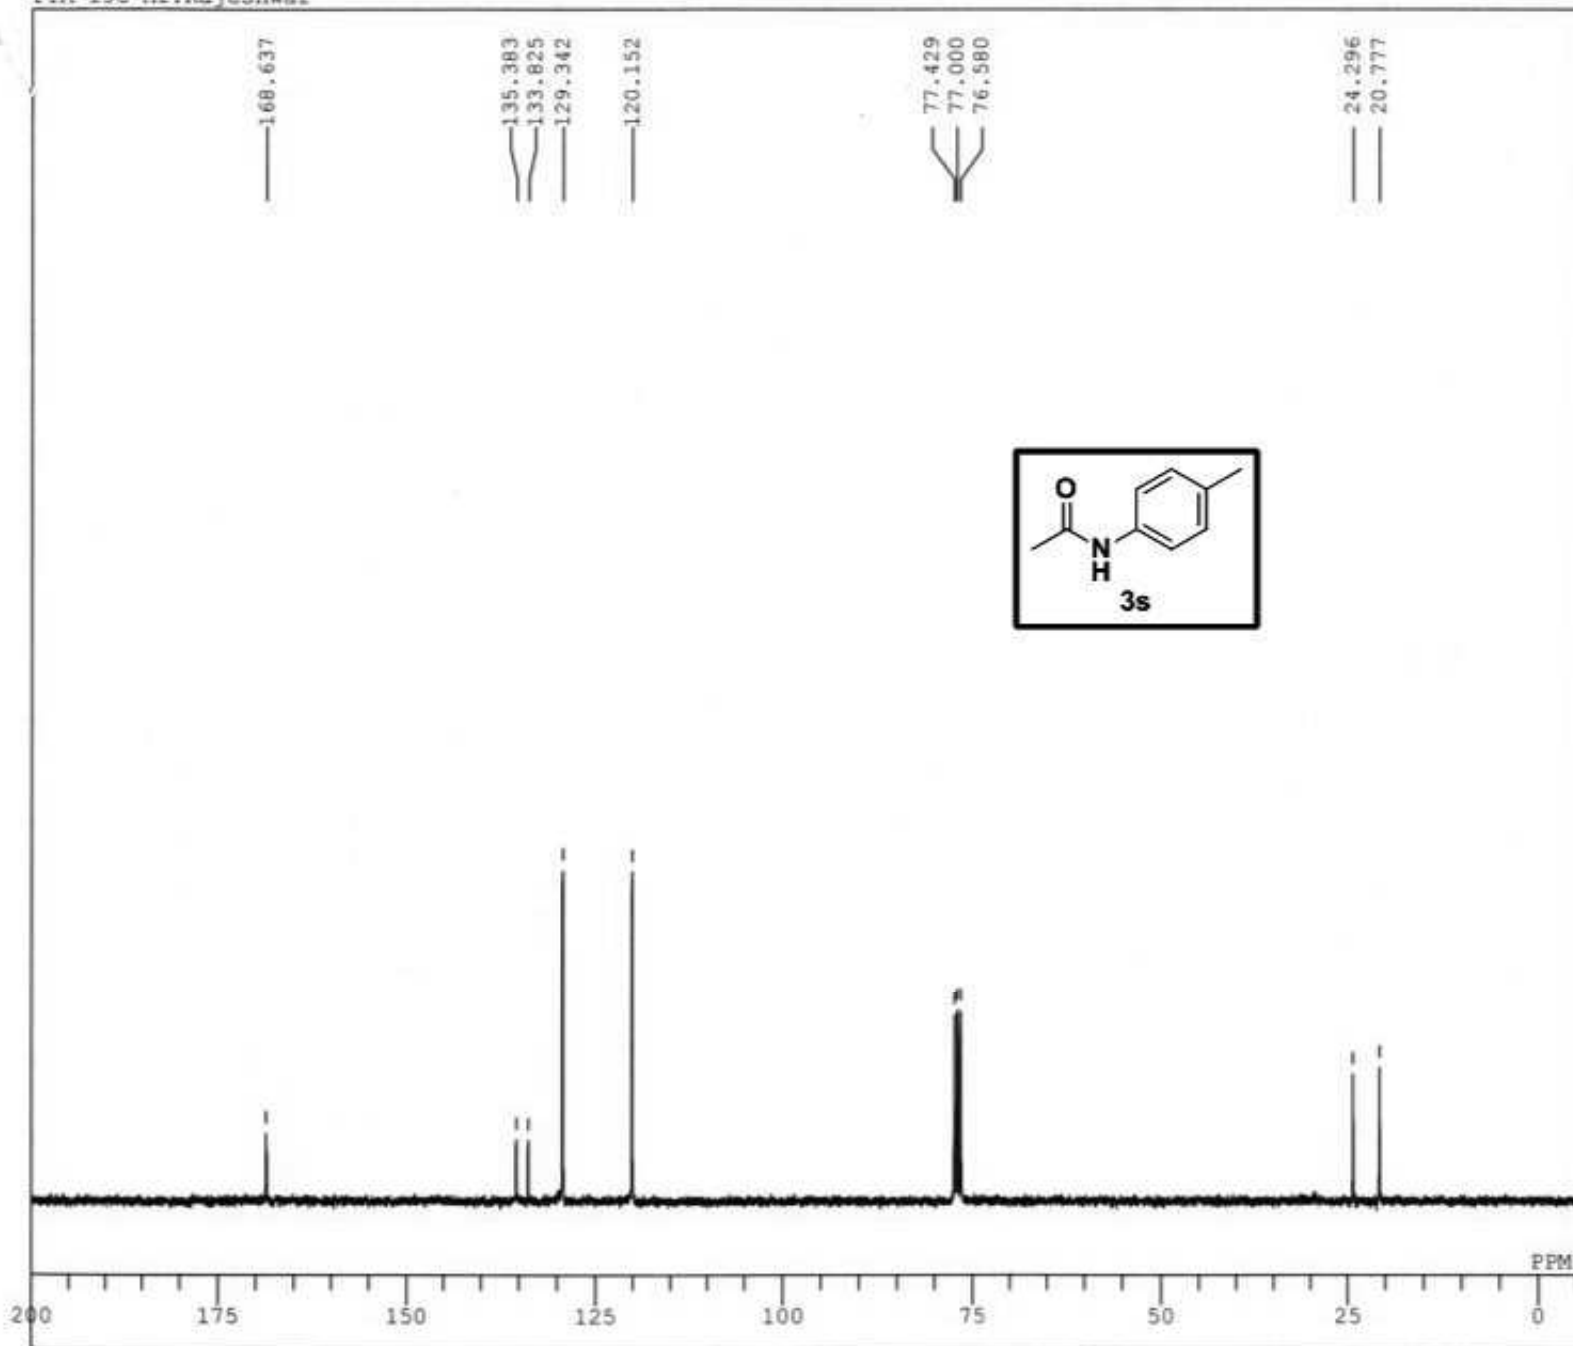

JEOL AL300 FTNMR  
CHEMISTRY DEPARTMENT  
Banaras Hindu University,  
VARANASI-221005

Operator : Nagendra Kumar  
Shishir Singh

DFILE C:\WINNMR98\COMMON\\_DEFAULT.  
COMNT PTA\_13C\_Mr.Rajeshwar  
DATIM Wed Jul 18 17:13:07 2012  
OBNUC 13C  
EXMOD BCM  
OBFRQ 75.45 MHz  
OBSET 127.30 KHz  
OBFIN 44.7 Hz  
POINT 32768  
FREQU 20408.1 Hz  
SCANS 539  
ACQTM 1.606 sec  
PD 1.394 sec  
PW1 6.0 us  
IRNUC 1H  
CTEMP 25.9 c  
SLVNT CDCL3  
EXREF 77.00 ppm  
BF 1.20 Hz  
RGAIN 25



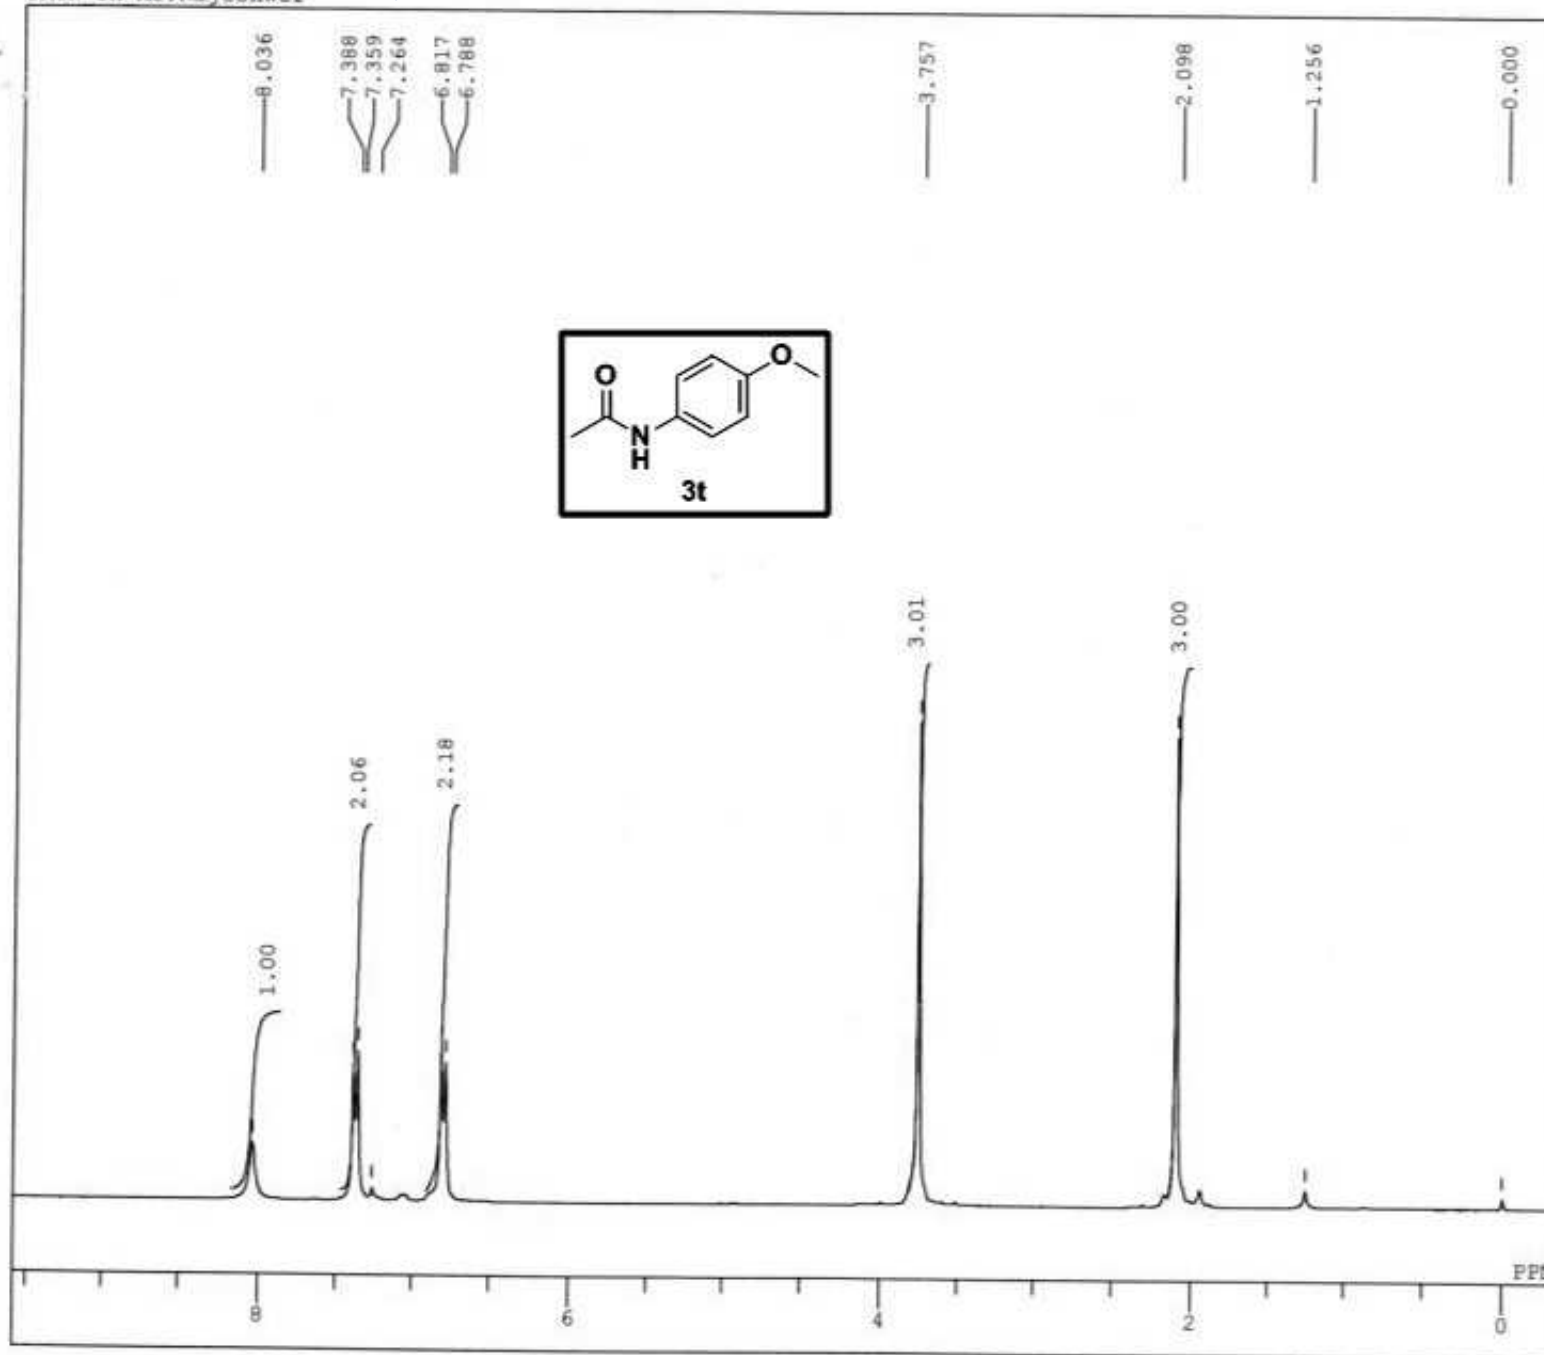

JEOL AL300 FTNMR  
CHEMISTRY DEPARTMENT  
Banaras Hindu University,  
VARANASI-221005

Operator : Nagendra Kumar  
Shishir Singh

DFILE C:\WINNMR98\COMMON\\_DEFAULT.  
COMNT PACN 1H Mr.Rajeshwer  
DATIM Wed Jul 18 12:23:09 2012  
OBNUC 1H  
EXMOD NON  
OBFRQ 300.40 MHz  
OBSET 130.00 KHz  
OBFIN 1150.0 Hz  
POINT 32768  
FREQU 9505.7 Hz  
SCANS 16  
ACQTM 3.447 sec  
PD 1.547 sec  
PW1 5.2 us  
IRNUC 1H  
CTEMP 23.2 c  
SLVNT CDCL3  
EXREF 0.00 ppm  
BF 1.20 Hz  
RGAIN 13

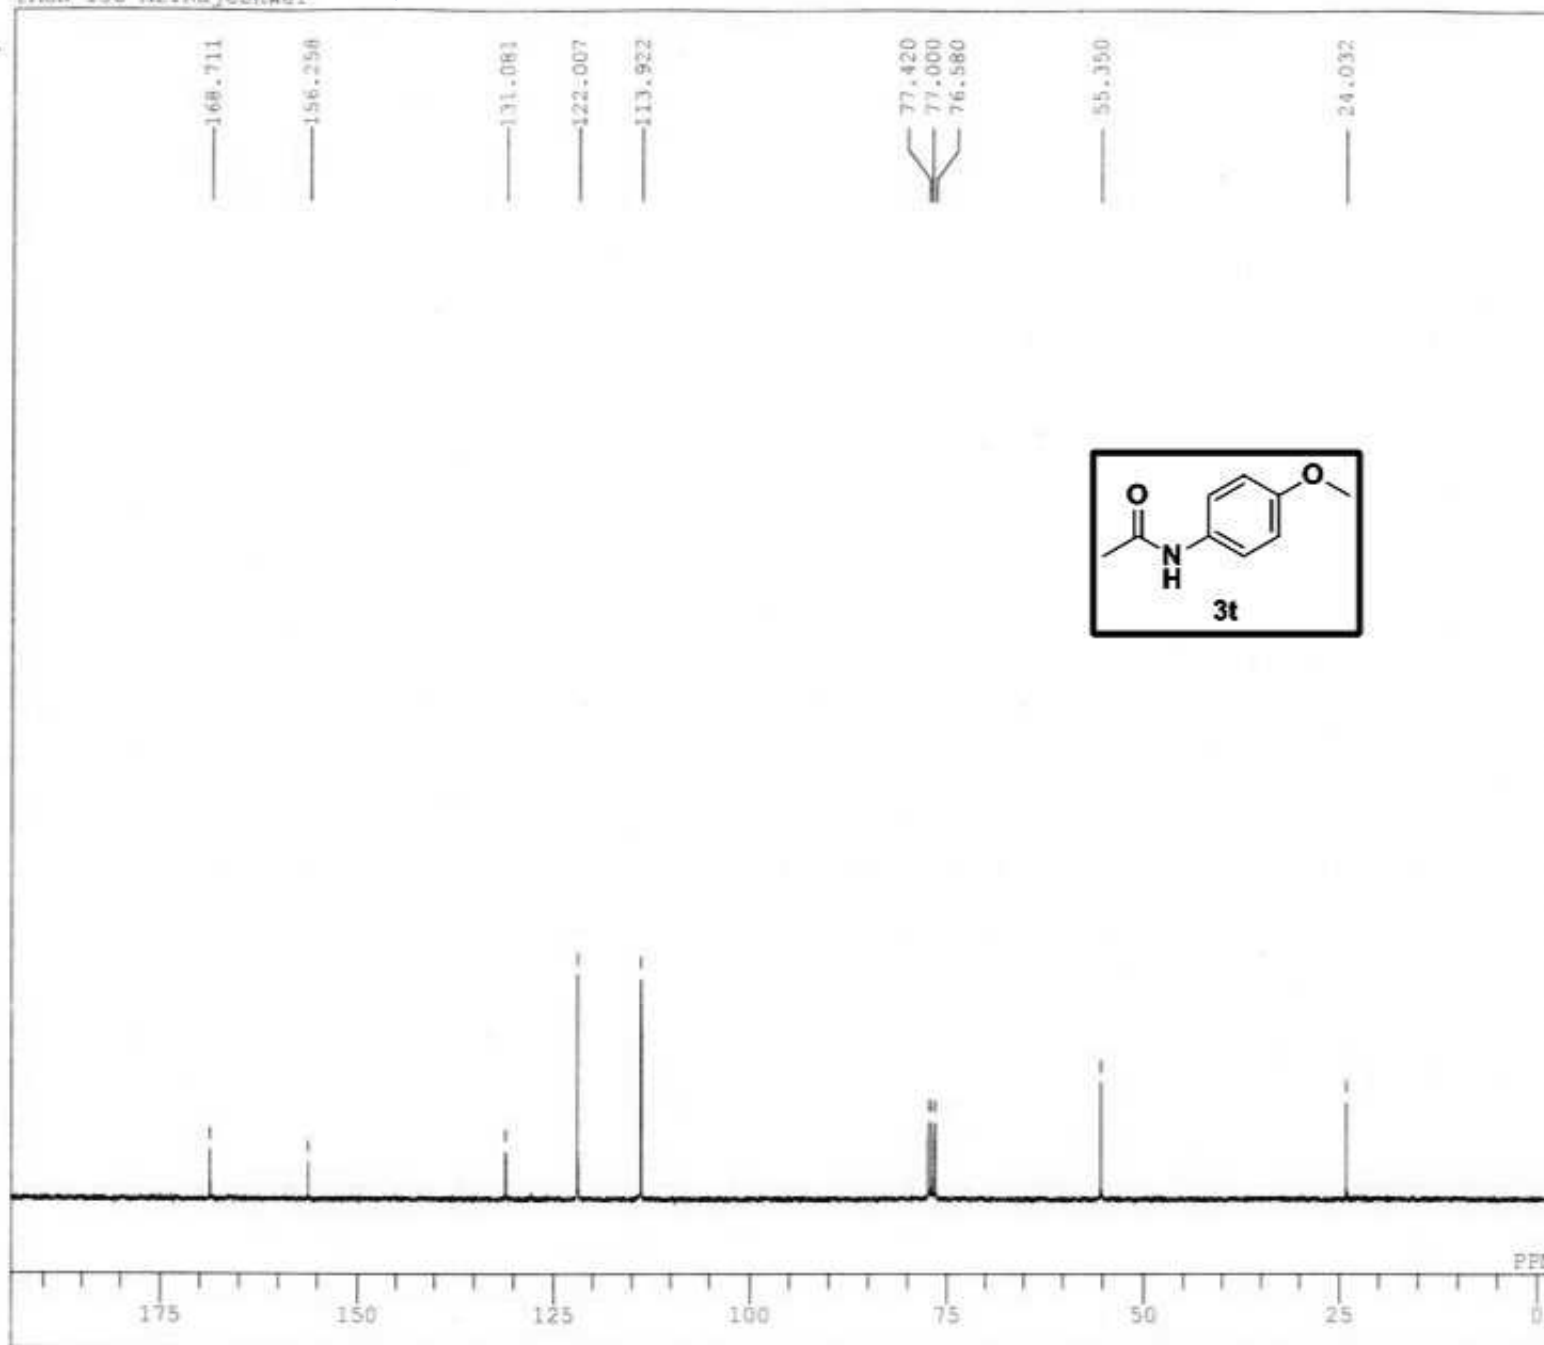

JEOL AL300 FTNMR  
CHEMISTRY DEPARTMENT  
Banaras Hindu University,  
VARANASI-221005

Operator : Nagendra Kumar  
Shishir Singh

DFILE C:\K.N. Singh,,I.T\PACN\_13C.  
COMNT PACN 13C Mr.Rajeshwer  
DATIM Wed Jul 18 12:18:40 2012  
CNUC 13C  
EXMOD BCM  
OBFRO 75.45 MHz  
OBSET 127.30 KHz  
OBFIN 44.7 Hz  
POINT 32768  
FREQU 20408.1 Hz  
SCANS 98  
ACQTM 1.606 sec  
PD 1.394 sec  
PWI 6.0 us  
IRNUC 1H  
CTEMP 22.0 c  
SLVNT CDCL3  
EXREF 77.00 ppm  
BF 1.20 Hz  
RGAIN 25

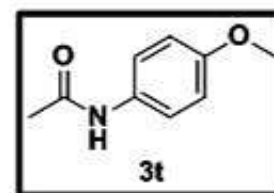

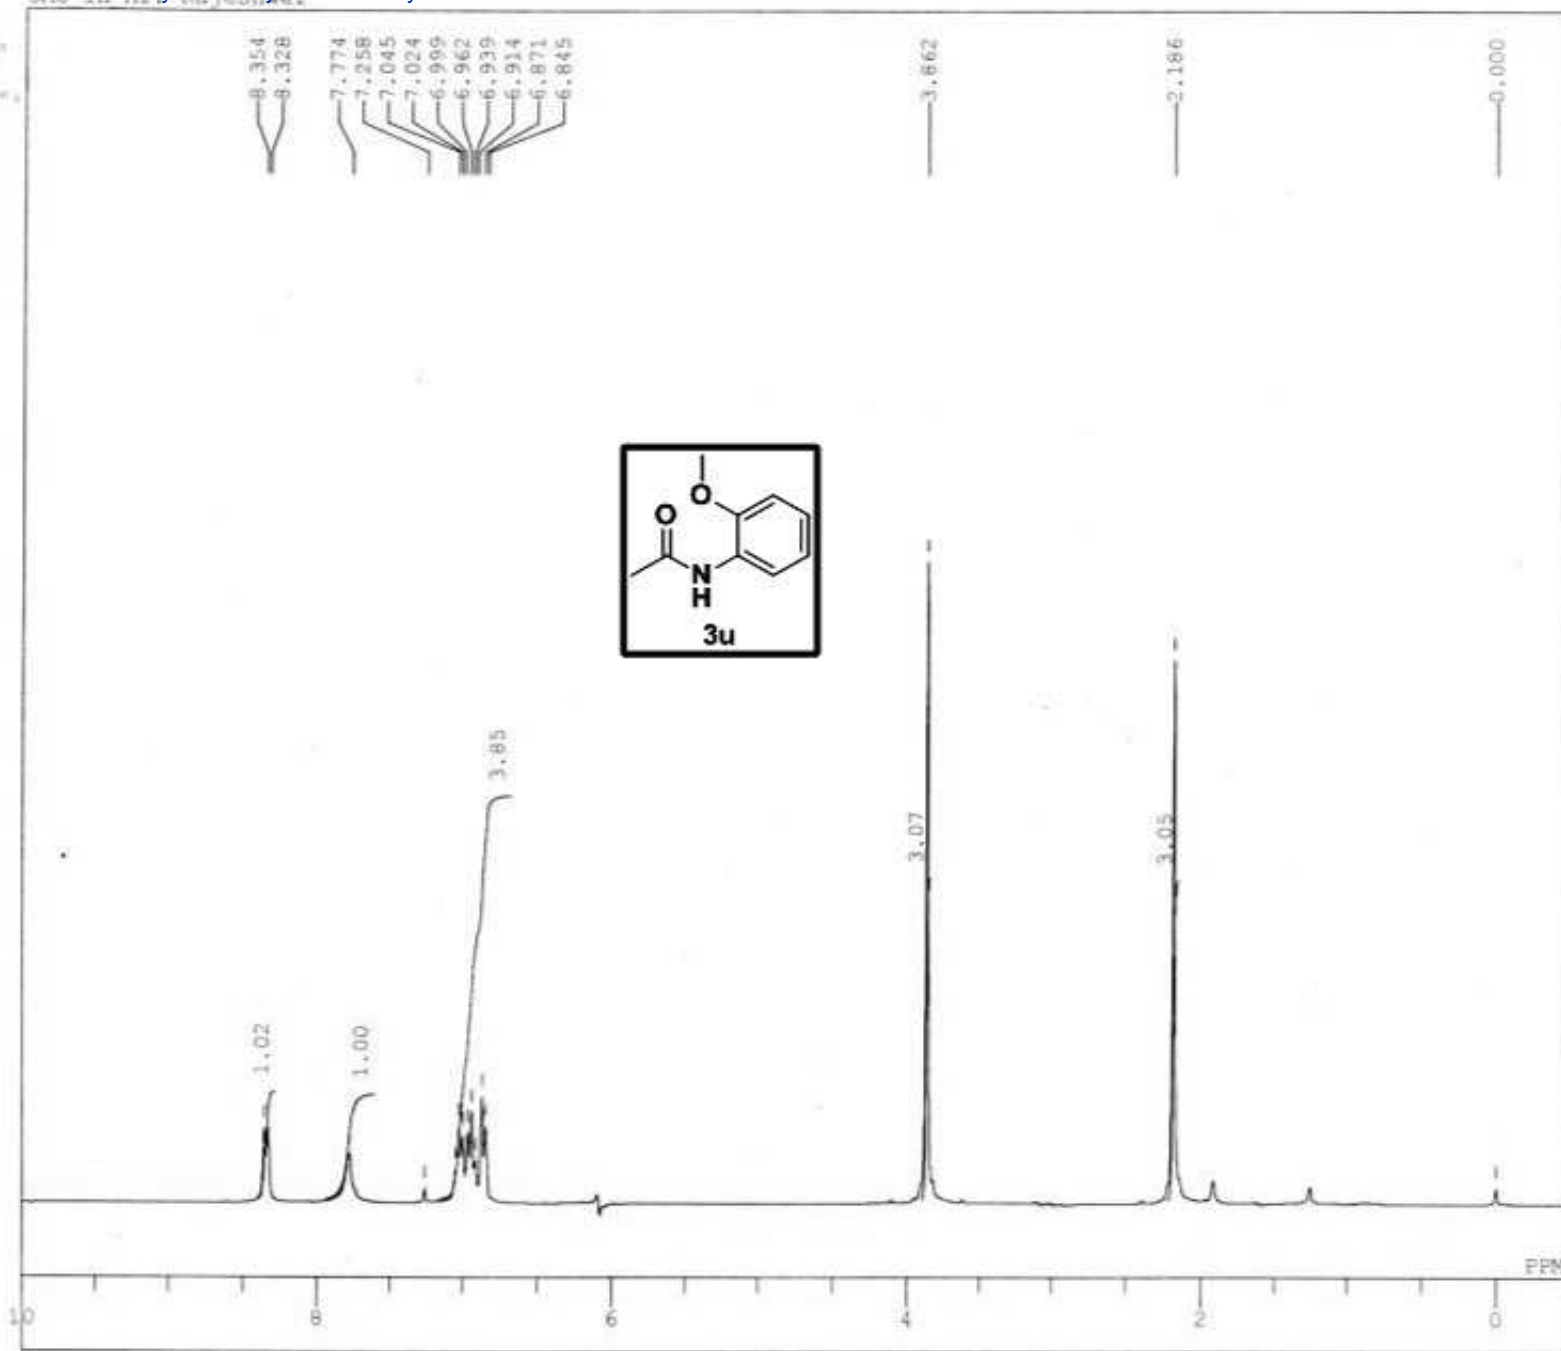

JEOL AL300 FTNMR  
CHEMISTRY DEPARTMENT  
Banaras Hindu University,  
VARANASI-221005

Operator : Nagendra Kumar  
Shishir Singh

DFILE C:\K.N. Singh,,1.T\OAC\_1H.a1  
COMNT OAC\_1H\_Mr. Rajeshwer  
DATIM Mon Jul 23 16:08:29 2012  
OBNUC 1H  
EXMOD NON  
OBFRQ 300.40 MHz  
OBSET 130.00 KHz  
OBFIN 1150.0 Hz  
POINT 32768  
FREQU 9505.7 Hz  
SCANS 43  
ACQTM 3.447 sec  
PD 1.547 sec  
PWI 5.2 us  
IRNUC 1H  
CTEMP 21.3 c  
SLVNT CDCL3  
EXREF 0.00 ppm  
BF 1.20 Hz  
RGAIN 13

OAC 1H Mr.Rajeshwar

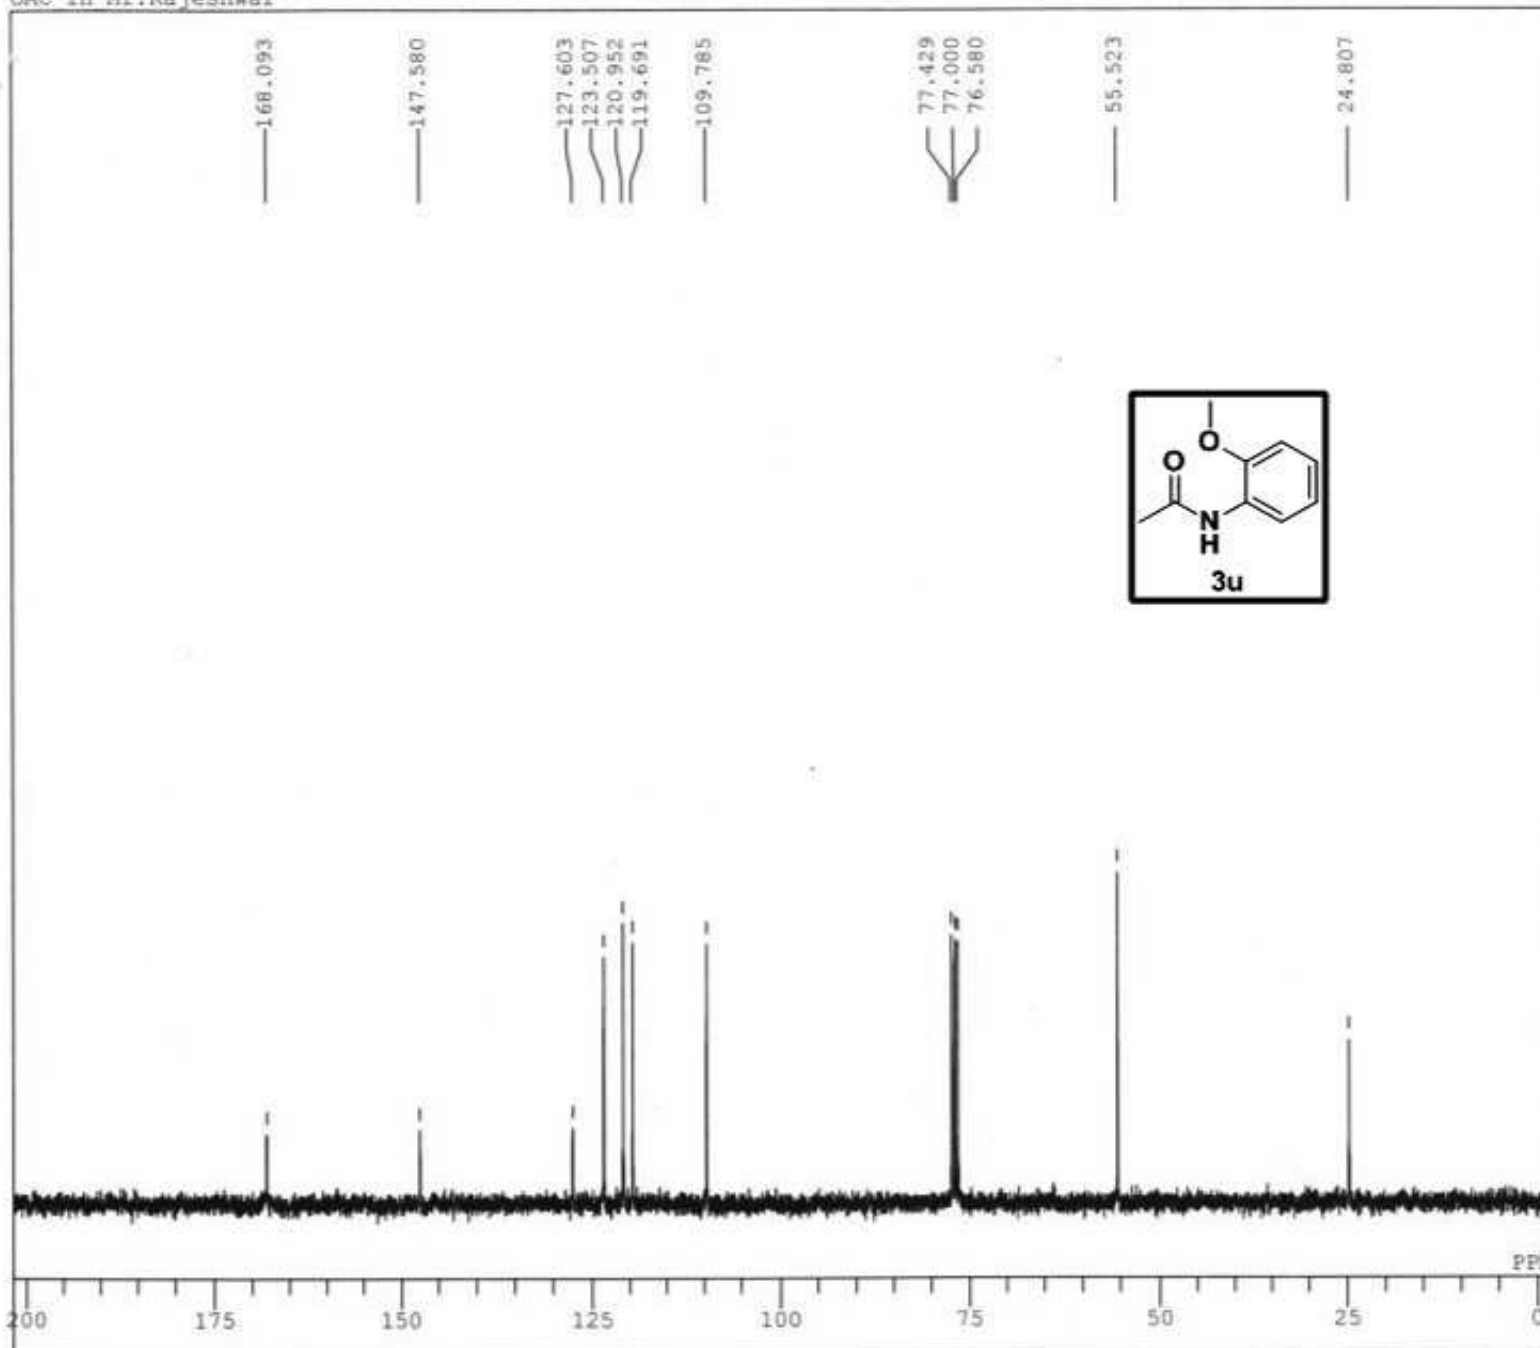

JEOL AL300 FTNMR  
CHEMISTRY DEPARTMENT  
Banaras Hindu University,  
VARANASI-221005

Operator : Nagendra Kumar  
Shishir Singh

DFILE C:\K.N. Singh,,I.T\OAC\_13C.e  
COMNT OAC\_1H Mr.Rajeshwar  
DATIM Wed Jul 25 15:52:54 2012  
OBNUC 13C  
EXMOD BCM  
OBFRQ 75.45 MHz  
OBSET 127.30 KHz  
OBFIN 44.7 Hz  
POINT 32768  
FREQU 20408.1 Hz  
SCANS 100  
ACQTM 1.606 sec  
PD 1.394 sec  
PW1 6.0 us  
IRNUC 1H  
CTEMP 21.6 c  
SLVNT CDCL3  
EXREF 77.00 ppm  
BF 1.20 Hz  
RGAIN 24

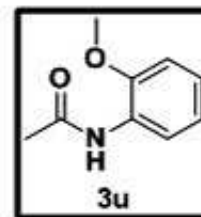

HYD 1H Mr.Rajeshwar

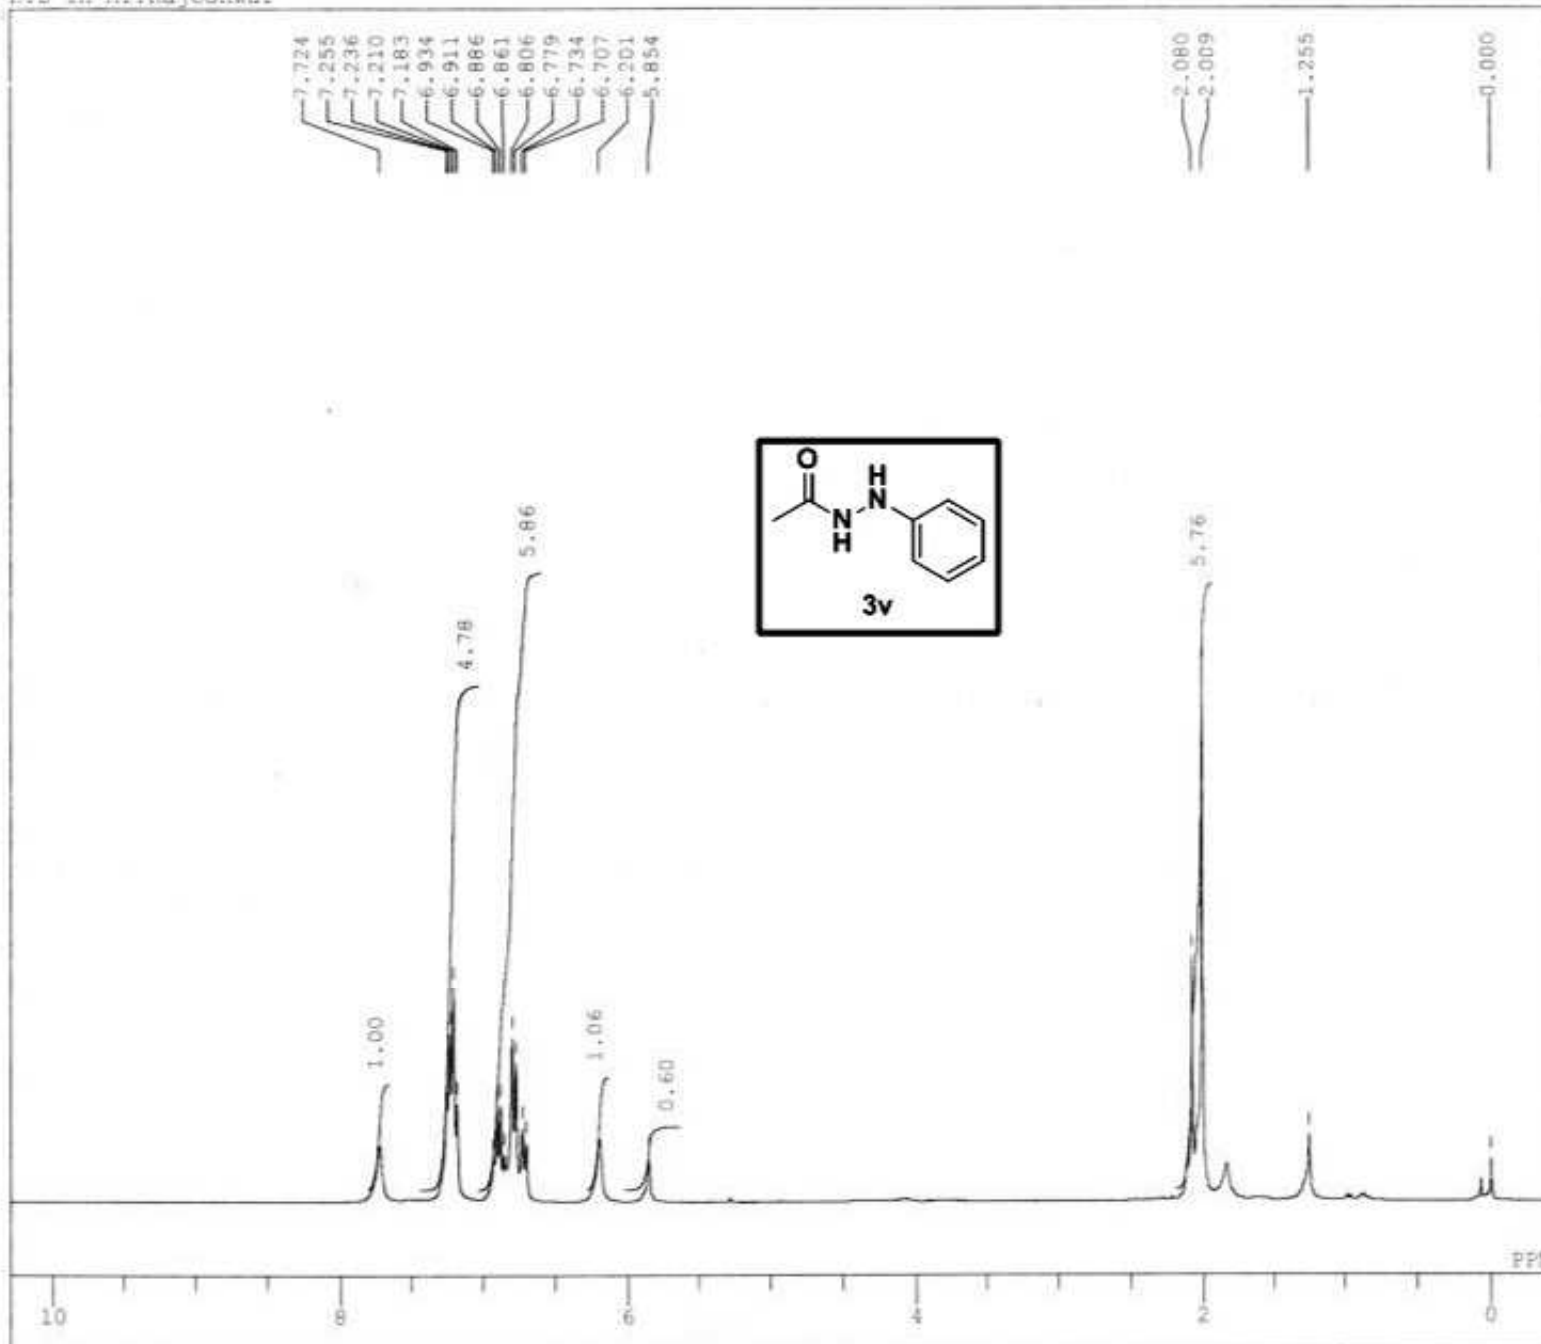

JEOL AL300 FTNMR  
CHEMISTRY DEPARTMENT  
Banaras Hindu University,  
VARANASI-221005

Operator : Nagendra Kumar  
Shishir Singh

DFILE C:\K.N. Singh,,I.T\HYD\_1H.a1  
COMNT HYD\_1H Mr.Rajeshwar  
DATIM Fri Jul 27 14:17:18 2012  
OBNUC 1H  
EXMOD NON  
OBFRQ 300.40 MHz  
OBSET 130.00 KHz  
OBFIN 1150.0 Hz  
POINT 32768  
FREQU 6016.8 Hz  
SCANS 32  
ACQTM 5.446 sec  
PD 1.547 sec  
PWL 5.2 us  
IRNUC 1H  
CTEMP 20.7 c  
SLVNT CDCL3  
EXREF 0.00 ppm  
BF 1.20 Hz  
RGAIN 14

HYD 1H Mr.Rajeshwar

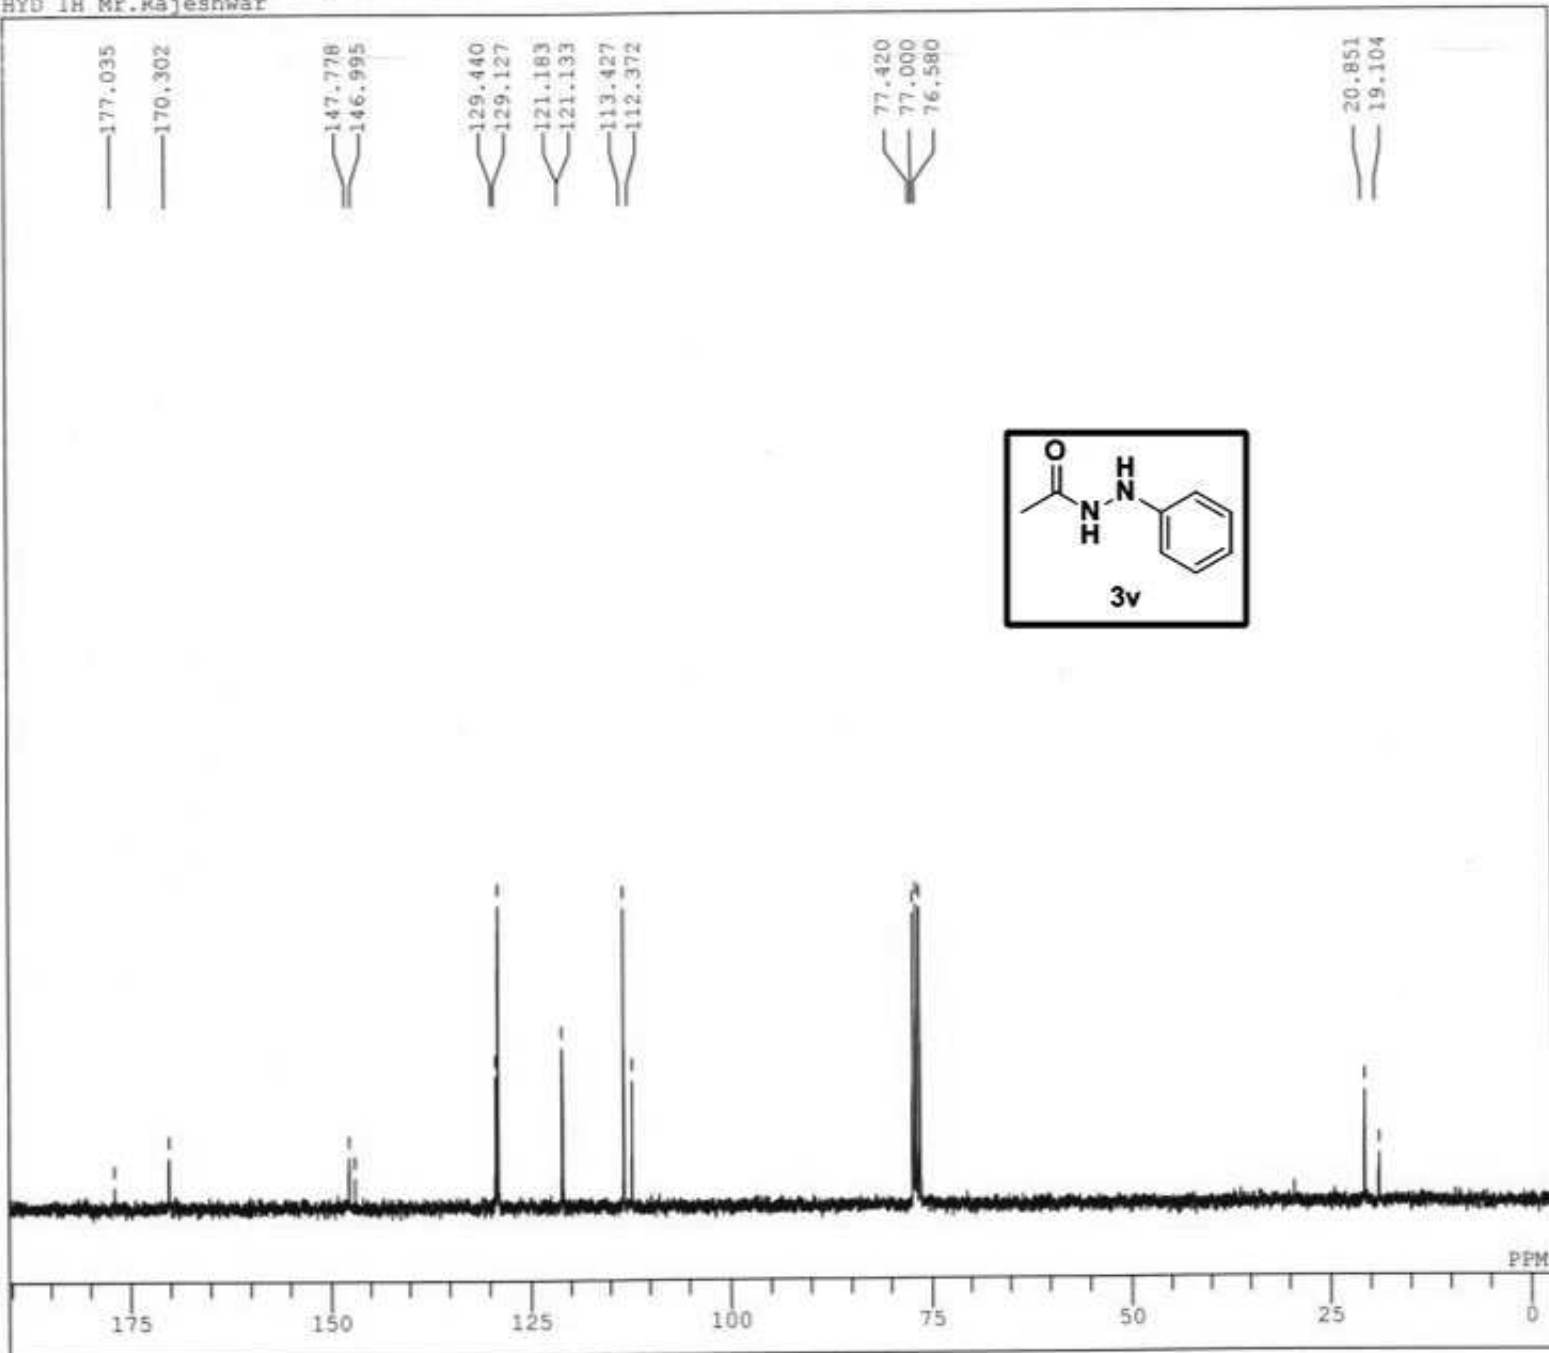

JEOL AL300 FTNMR  
CHEMISTRY DEPARTMENT  
Banaras Hindu University,  
VARANASI-221005

Operator : Nagendra Kumar  
Shishir Singh

DFILE C:\WINNMR98\Data\HYD\_1H\_2BCM  
COMNT HYD\_1H Mr.Rajeshwar  
DATIM Fri Jul 27 14:32:40 2012  
OBNUC 13C  
EXMOD BCM  
OBFRQ 75.45 MHz  
OBSET 127.30 KHz  
OBFIN 44.7 Hz  
POINT 32768  
FREQU 20408.1 Hz  
SCANS 300  
ACQTM 1.606 sec  
PD 1.394 sec  
PW1 6.0 us  
IRNUC 1H  
CTEMP 21.3 c  
SLVNT CDCL3  
EXREF 77.00 ppm  
BF 1.20 Hz  
RGAIN 25

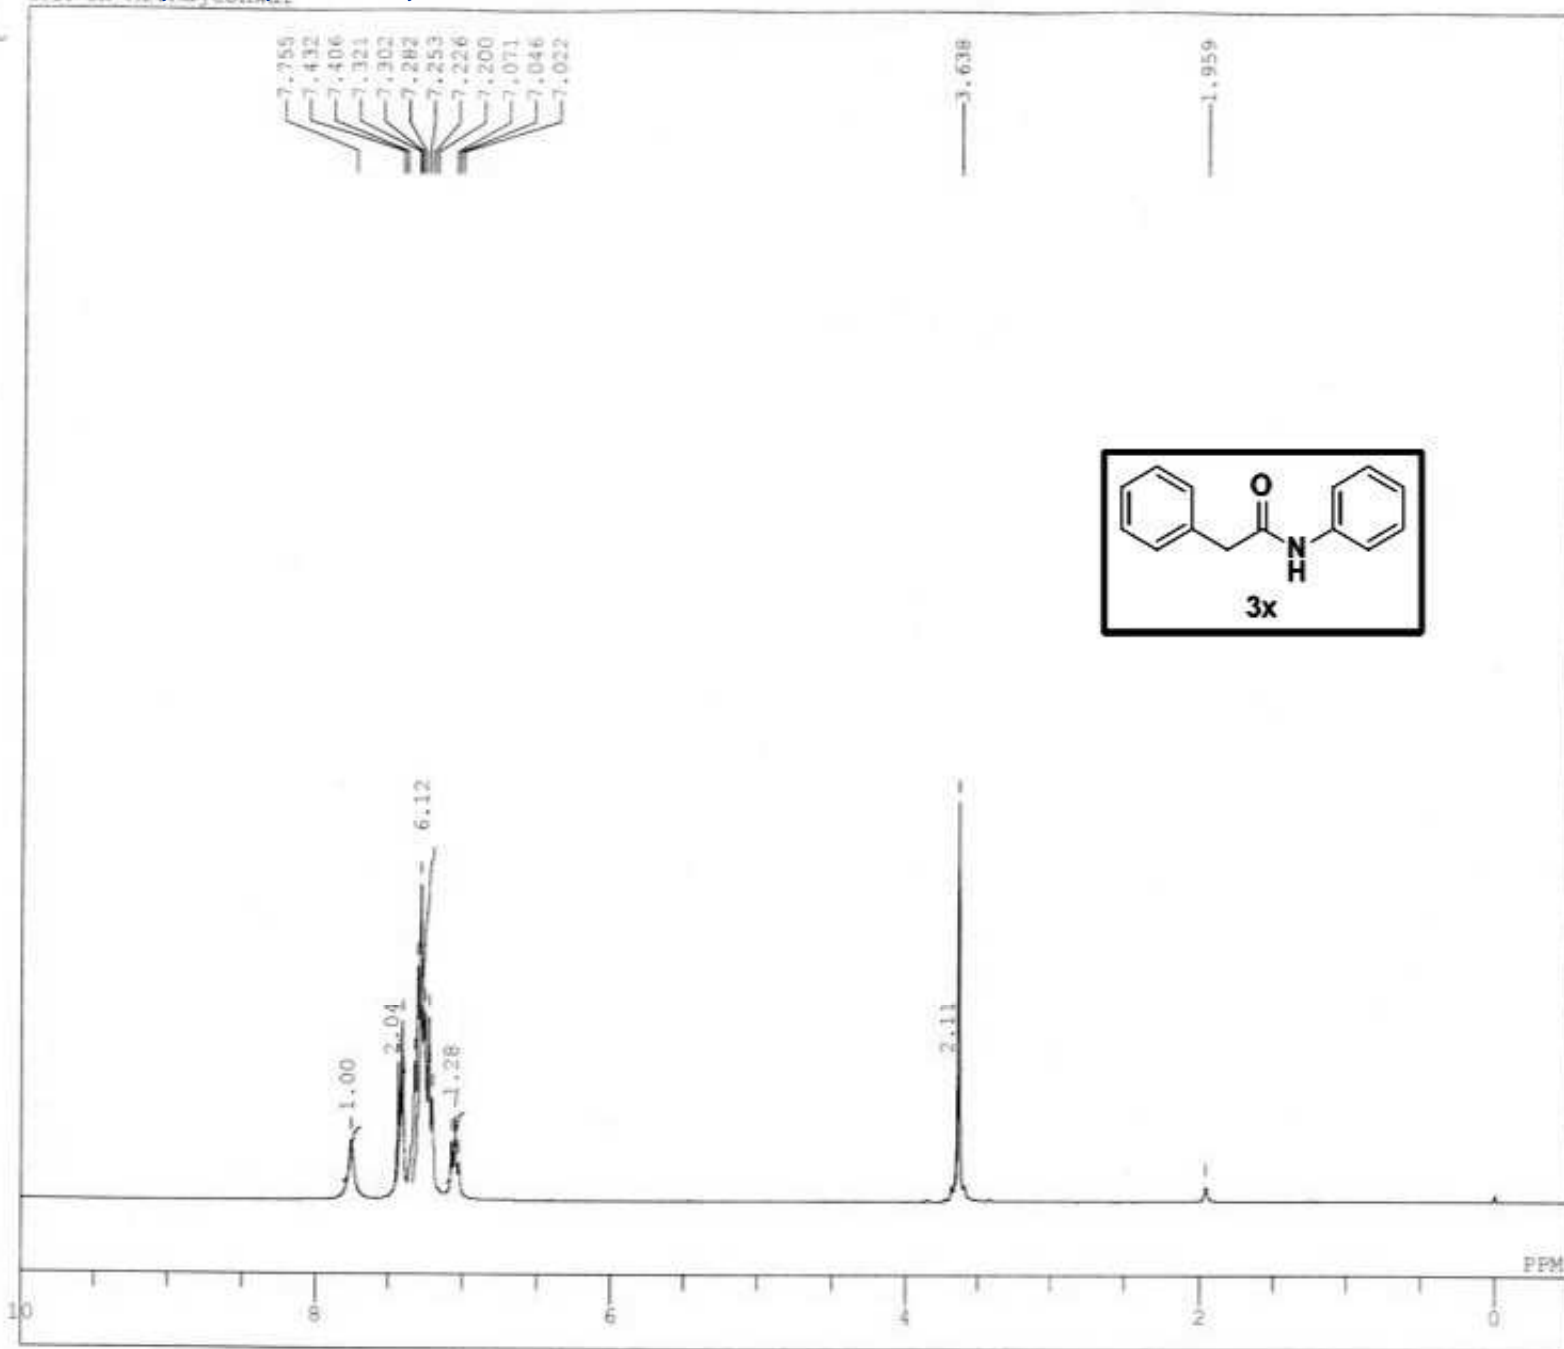

JEOL AL300 FTNMR  
CHEMISTRY DEPARTMENT  
Banaras Hindu University,  
VARANASI-221005

Operator : Nagendra Kumar  
Shishir Singh

DFILE C:\K.N. Singh,,I.T\PAI\_1H.a1  
COMNT PAI\_1H\_Mr.Rajeshwar  
DATIM Fri Sep 07 12:36:16 2012  
OBNUC 1H  
EXMOD NON  
OBFRQ 300.40 MHz  
OBSET 130.00 KHz  
OBFIN 1150.0 Hz  
POINT 32768  
FREQU 9505.7 Hz  
SCANS 16  
ACQTM 3.447 sec  
PD 1.547 sec  
PW1 5.2 us  
IRNUC 1H  
CTEMP 20.7 c  
SLVNT CDCL3  
EXREF 0.00 ppm  
BF 1.20 Hz  
RGAIN 10

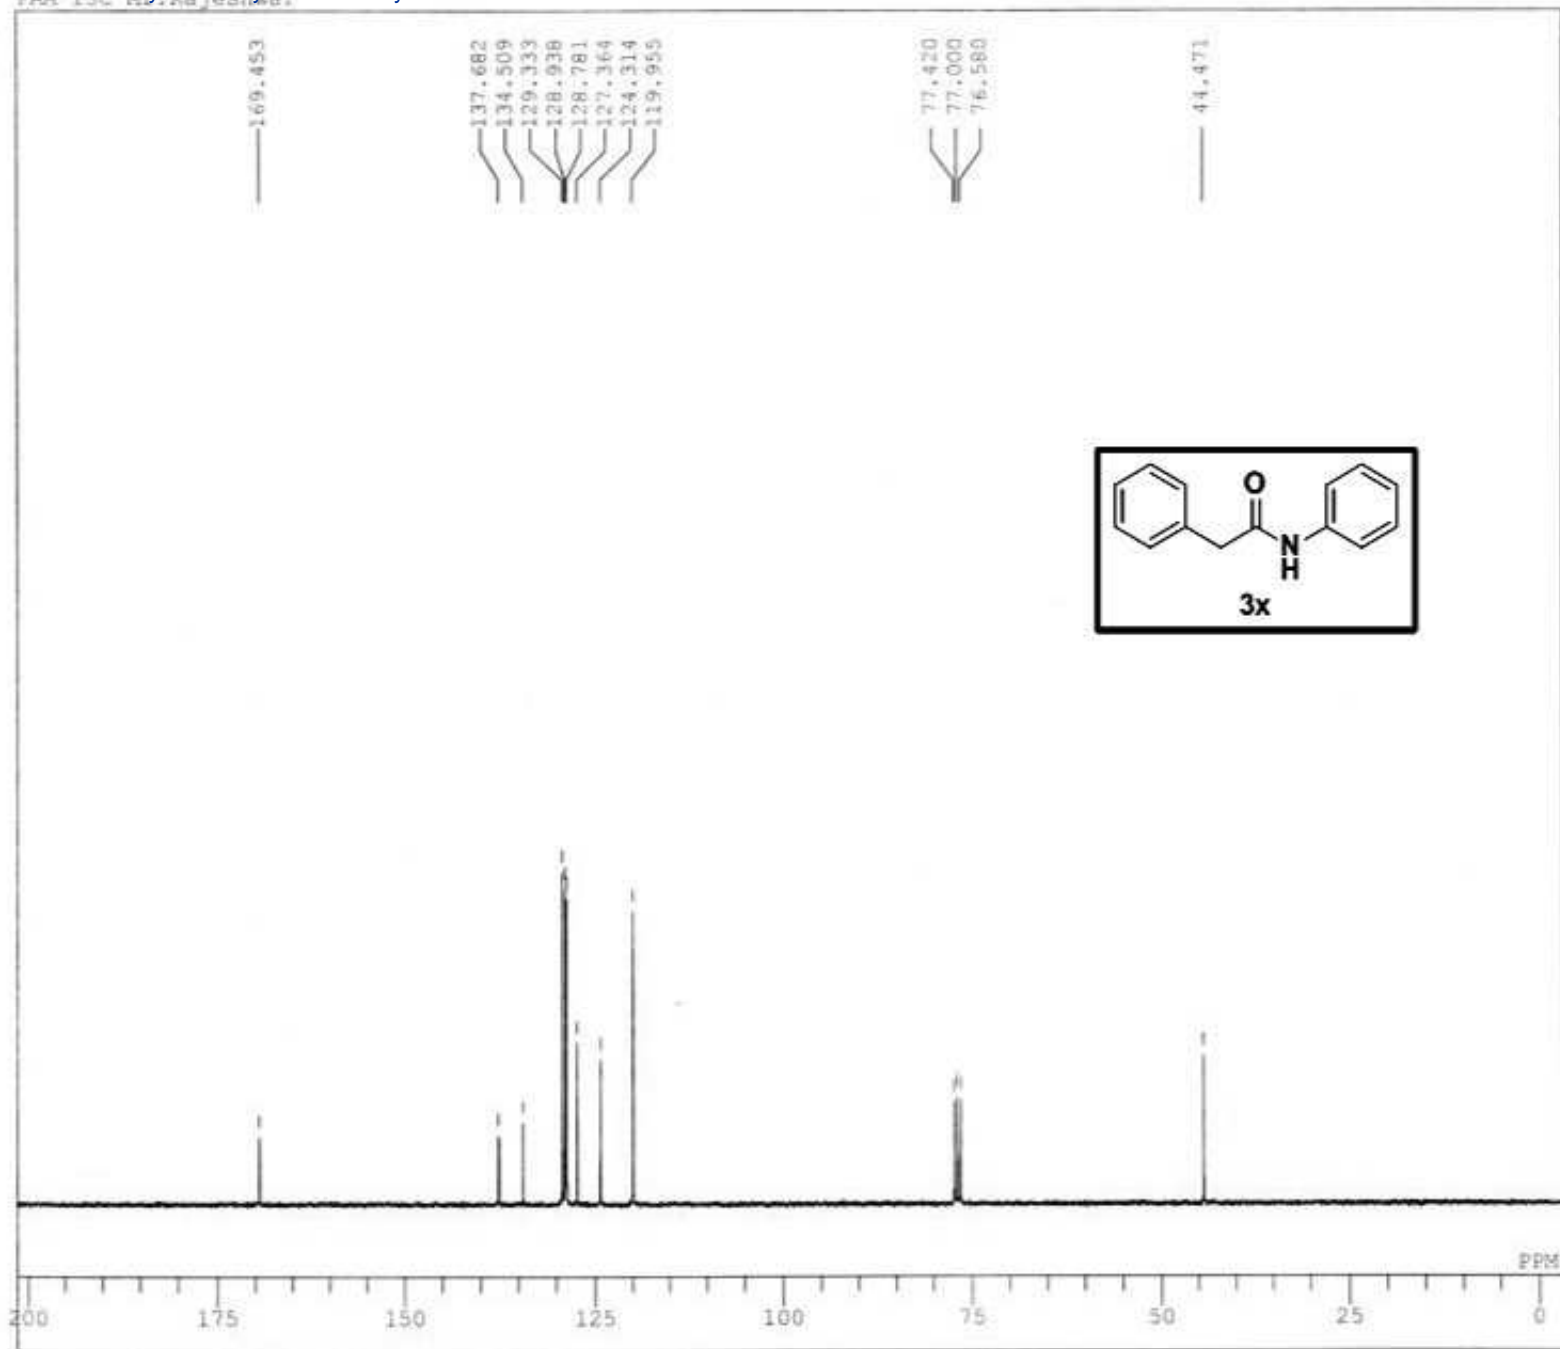

JEOL AL300 FTNMR  
CHEMISTRY DEPARTMENT  
Banaras Hindu University,  
VARANASI-221005

Operator : Nagendra Kumar  
Shishir Singh

DFILE C:\WINNMR98\COMMON\\_DEFAULT.  
COMNT PAA\_13C\_Mr.Rajeshwar  
DATIM Fri Sep 07 12:31:48 2012  
OBNUC 13C  
EXMOD BCM  
OBFREQ 75.45 MHz  
OBSET 127.30 KHz  
OBFIN 44.7 Hz  
POINT 32768  
FREQU 20408.1 Hz  
SCANS 161  
ACQTM 1.606 sec  
PD 1.394 sec  
FW1 6.0 us  
IRNUC 1H  
CTEMP 20.0 c  
SLVNT CDCL3  
EXREF 77.00 ppm  
BF 1.20 Hz  
RGAIN 25



C:\K.N. Singh,,I.T\BBA\_1H.als  
BBA\_1H Mr. Rajeshwer

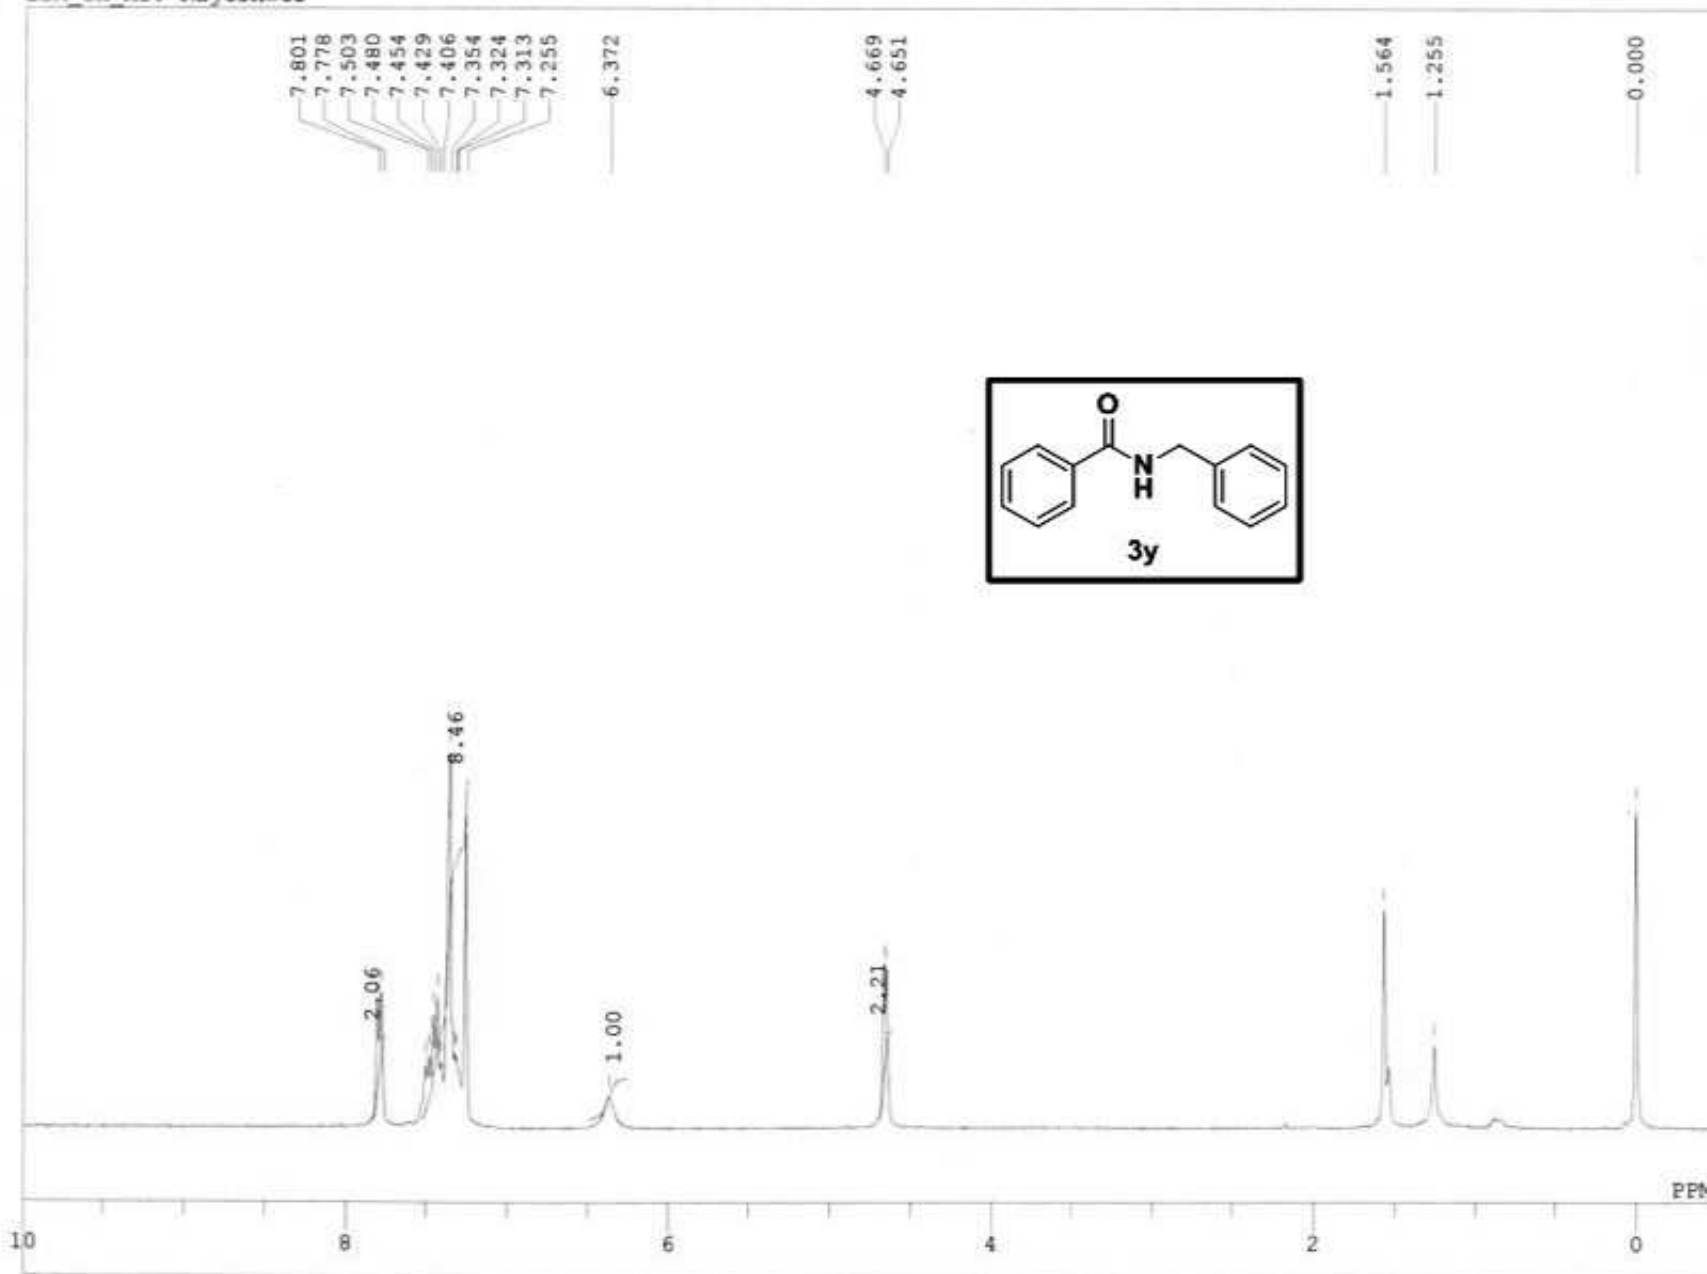

JEOL AL300 FTNMR  
CHEMISTRY DEPARTMENT  
Banaras Hindu University  
VARANASI-221005

Operator : Nagendra Kuma  
Shishir Singh

DFILE C:\K.N. Singh,,I.'  
COMNT BBA\_1H Mr. Rajesh  
DATIM Tue Apr 24 12:55:  
OBNUC 1H  
EXMOD NON  
OBFRQ 300.40 MHz  
OBSET 130.00 KHz  
OBFIN 1150.0 Hz  
POINT 32768  
FREQU 9505.7 Hz  
SCANS 21  
ACQTM 3.447 sec  
PD 1.547 sec  
PW1 5.2 us  
IRNUC 1H  
CTEMP 23.8 c  
SLVNT CDCL3  
EXREF 0.00 ppm  
BF 1.20 Hz  
RGAIN 23

ACN 13C Mr. Rajeshwer

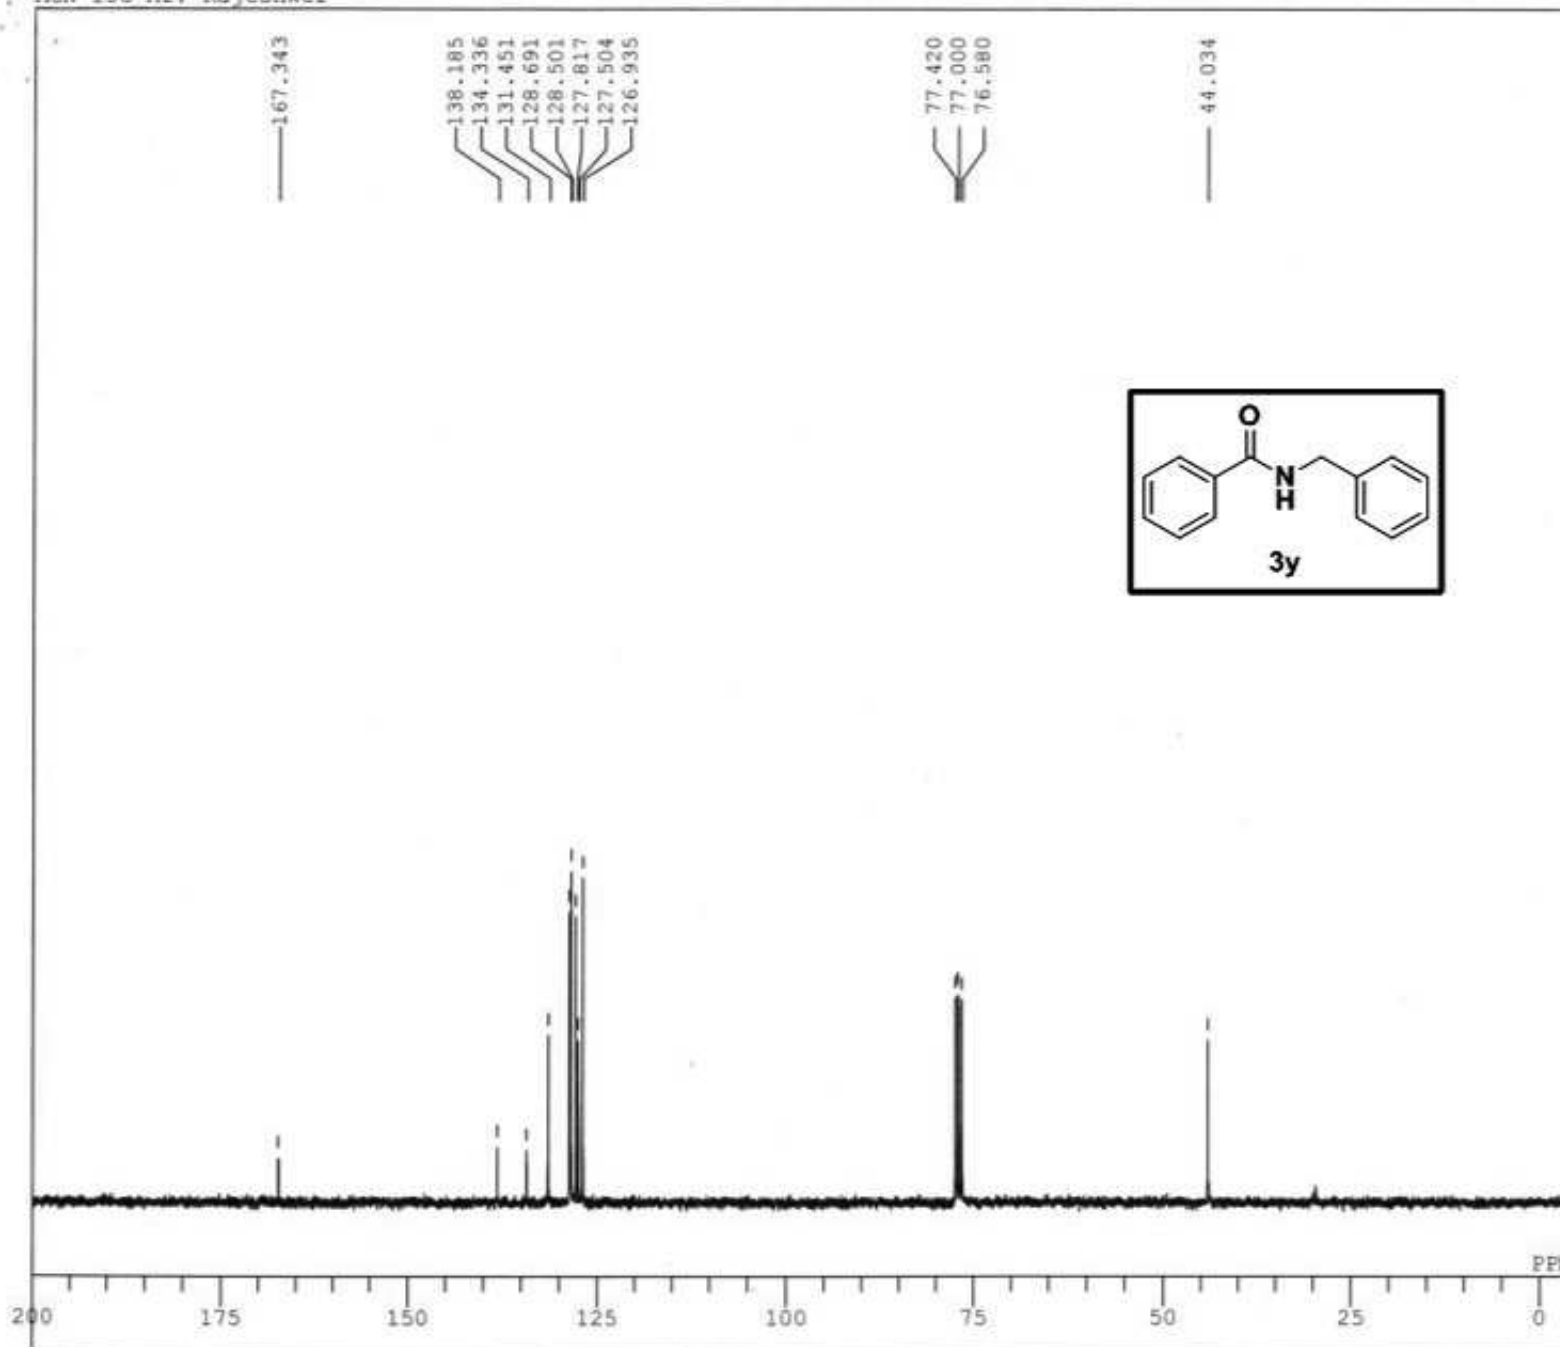

JEOL AL300 FTNMR  
CHEMISTRY DEPARTMENT  
Banaras Hindu University,  
VARANASI-221005

Operator : Nagendra Kumar  
Shishir Singh

DFILE C:\K.N. Singh,, I.T\ACN\_13C.e  
COMNT ACN\_13C\_Mr. Rajeshwer  
DATIM Fri Jun 29 17:00:51 2012  
OBNUC 13C  
EXMOD BCM  
OBFRQ 75.45 MHz  
OBSET 127.30 KHz  
OBFIN 44.7 Hz  
POINT 32768  
FREQU 20408.1 Hz  
SCANS 236  
ACQTM 1.606 sec  
PD 1.394 sec  
FW1 6.0 us  
IRNUC 1H  
CTEMP 23.3 c  
SLVNT CDCL3  
EXREF 77.00 ppm  
BF 1.20 Hz  
RGAIN 25

CYC\_1H Mr.Rajeshwar

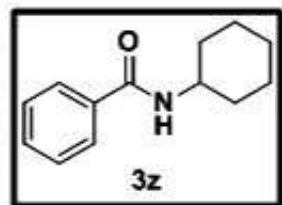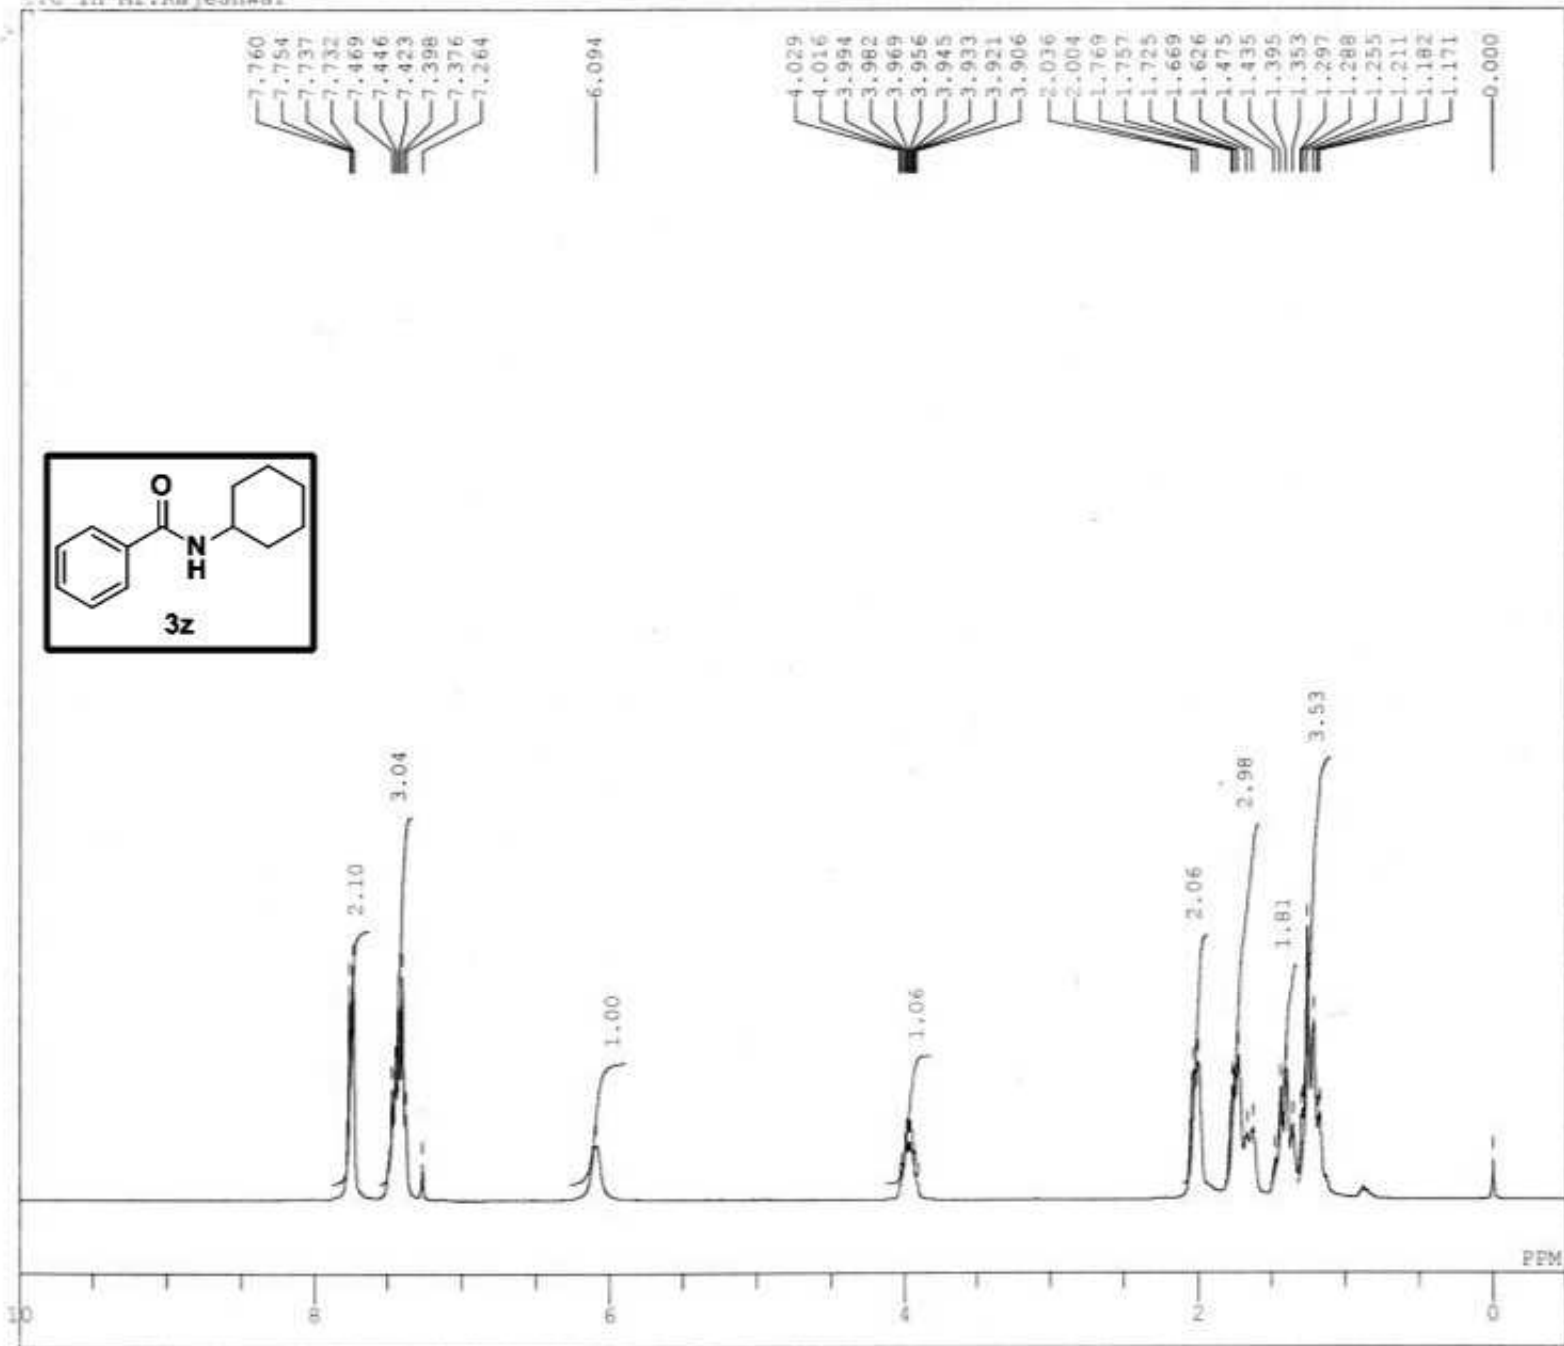

JEOL AL300 FTNMR  
CHEMISTRY DEPARTMENT  
Banaras Hindu University,  
VARANASI-221005

Operator : Nagendra Kumar  
Shishir Singh

DFILE C:\K.N. Singh,,I.T\CYC\_1H.al  
COMNT CYC\_1H Mr.Rajeshwar  
DATIM Mon Jul 09 13:18:58 2012  
OBNUC 1H  
EXMOD NON  
OBFRQ 300.40 MHz  
OBSET 130.00 KHz  
OBFIN 1150.0 Hz  
POINT 32768  
FREQU 9505.7 Hz  
SCANS 32  
ACQTM 3.447 sec  
PD 1.547 sec  
PW1 5.2 us  
IRNUC 1H  
CTEMP 19.5 c  
SLVNT CDCL3  
EXREF 0.00 ppm  
BF 1.20 Hz  
RGAIN 12

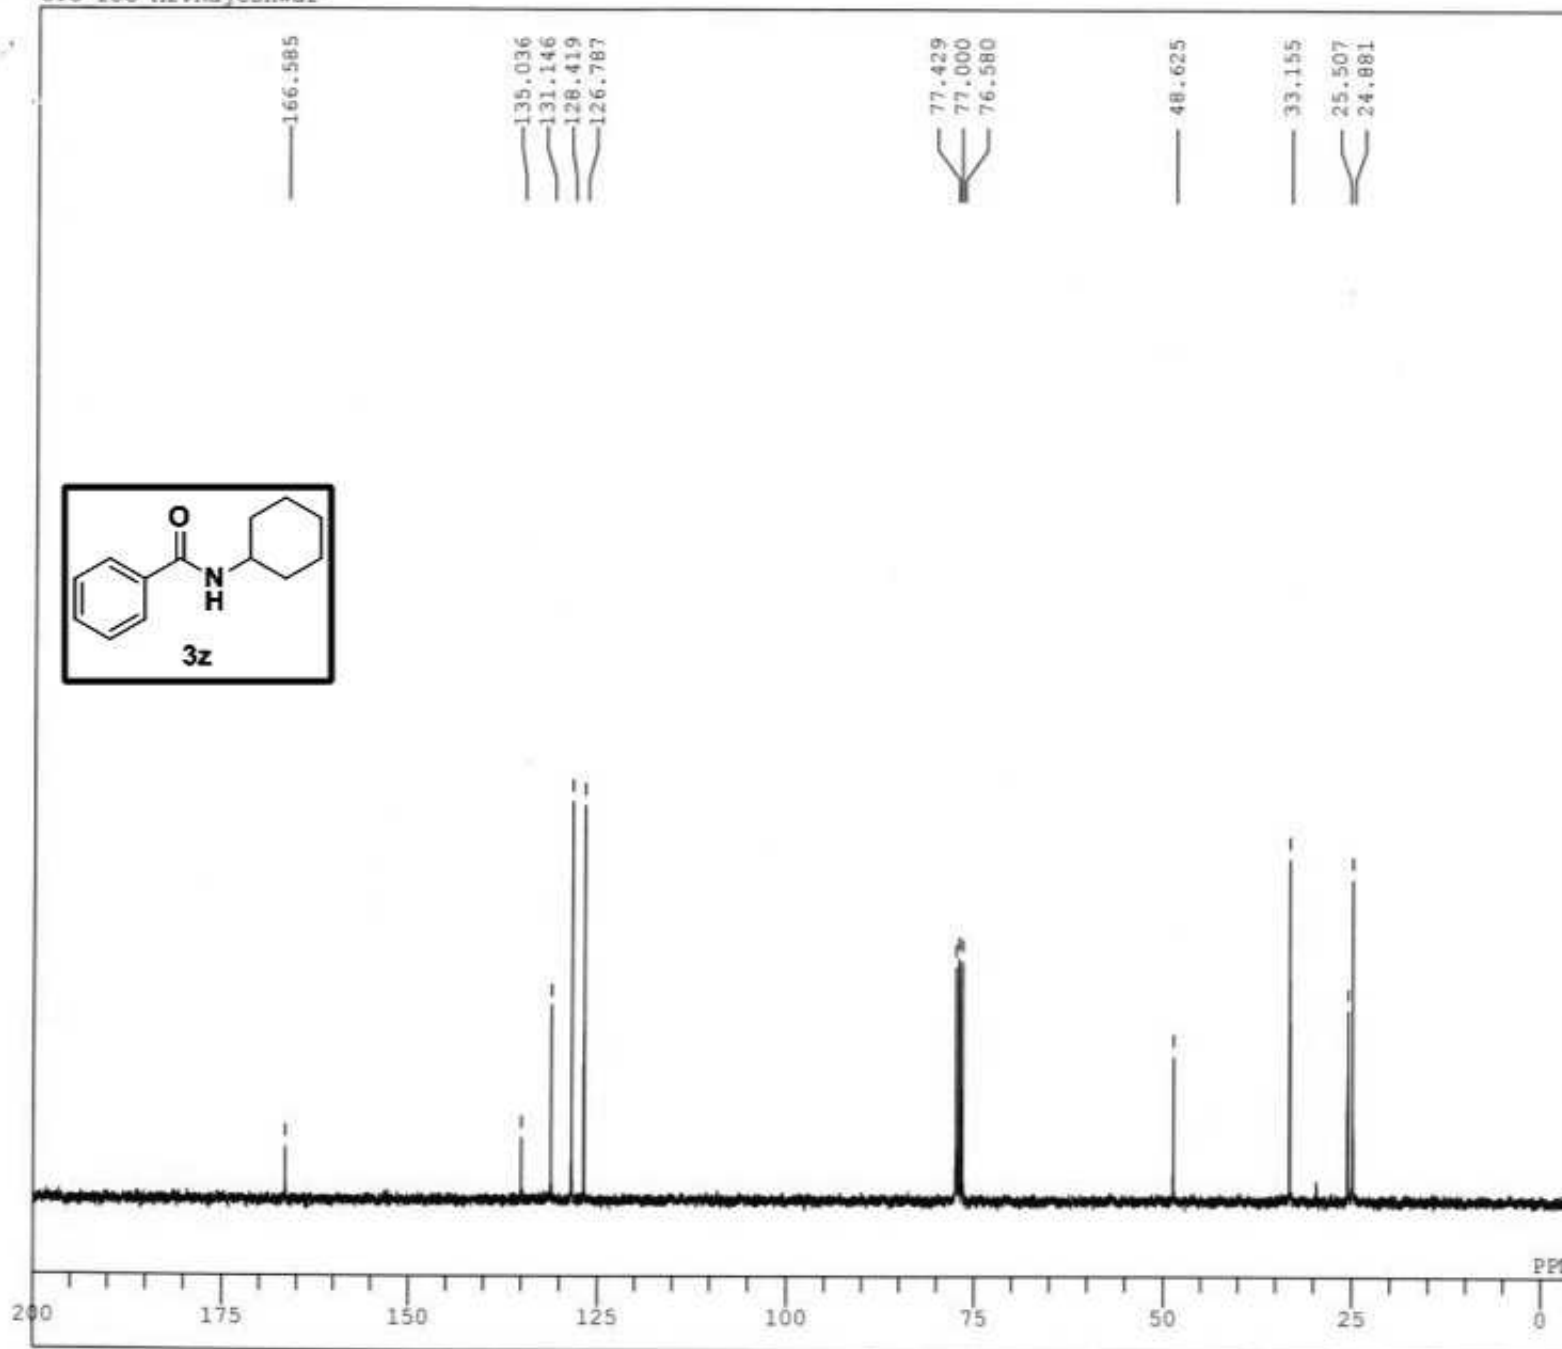

JEOL AL300 FTNMR  
CHEMISTRY DEPARTMENT  
Banaras Hindu University,  
VARANASI-221005

Operator : Nagendra Kumar  
Shishir Singh

DFILE C:\WINNMR98\COMMON\\_DEFAULT.  
COMNT CYC\_13C\_Mr.Rajeshwar  
DATIM Mon Jul 09 13:33:54 2012  
OBNUC 13C  
EXMOD BCM  
OBFRQ 75.45 MHz  
OBSET 127.30 KHz  
OBFIN 44.7 Hz  
POINT 32768  
FREQU 20408.1 Hz  
SCANS 200  
ACQTM 1.606 sec  
PD 1.394 sec  
PW1 6.0 us  
IRNUC 1H  
CTEMP 19.8 c  
SLVNT CDCL3  
EXREF 77.00 ppm  
BF 1.20 Hz  
RGAIN 25

BEA\_1H\_Mr.Rajeshwar

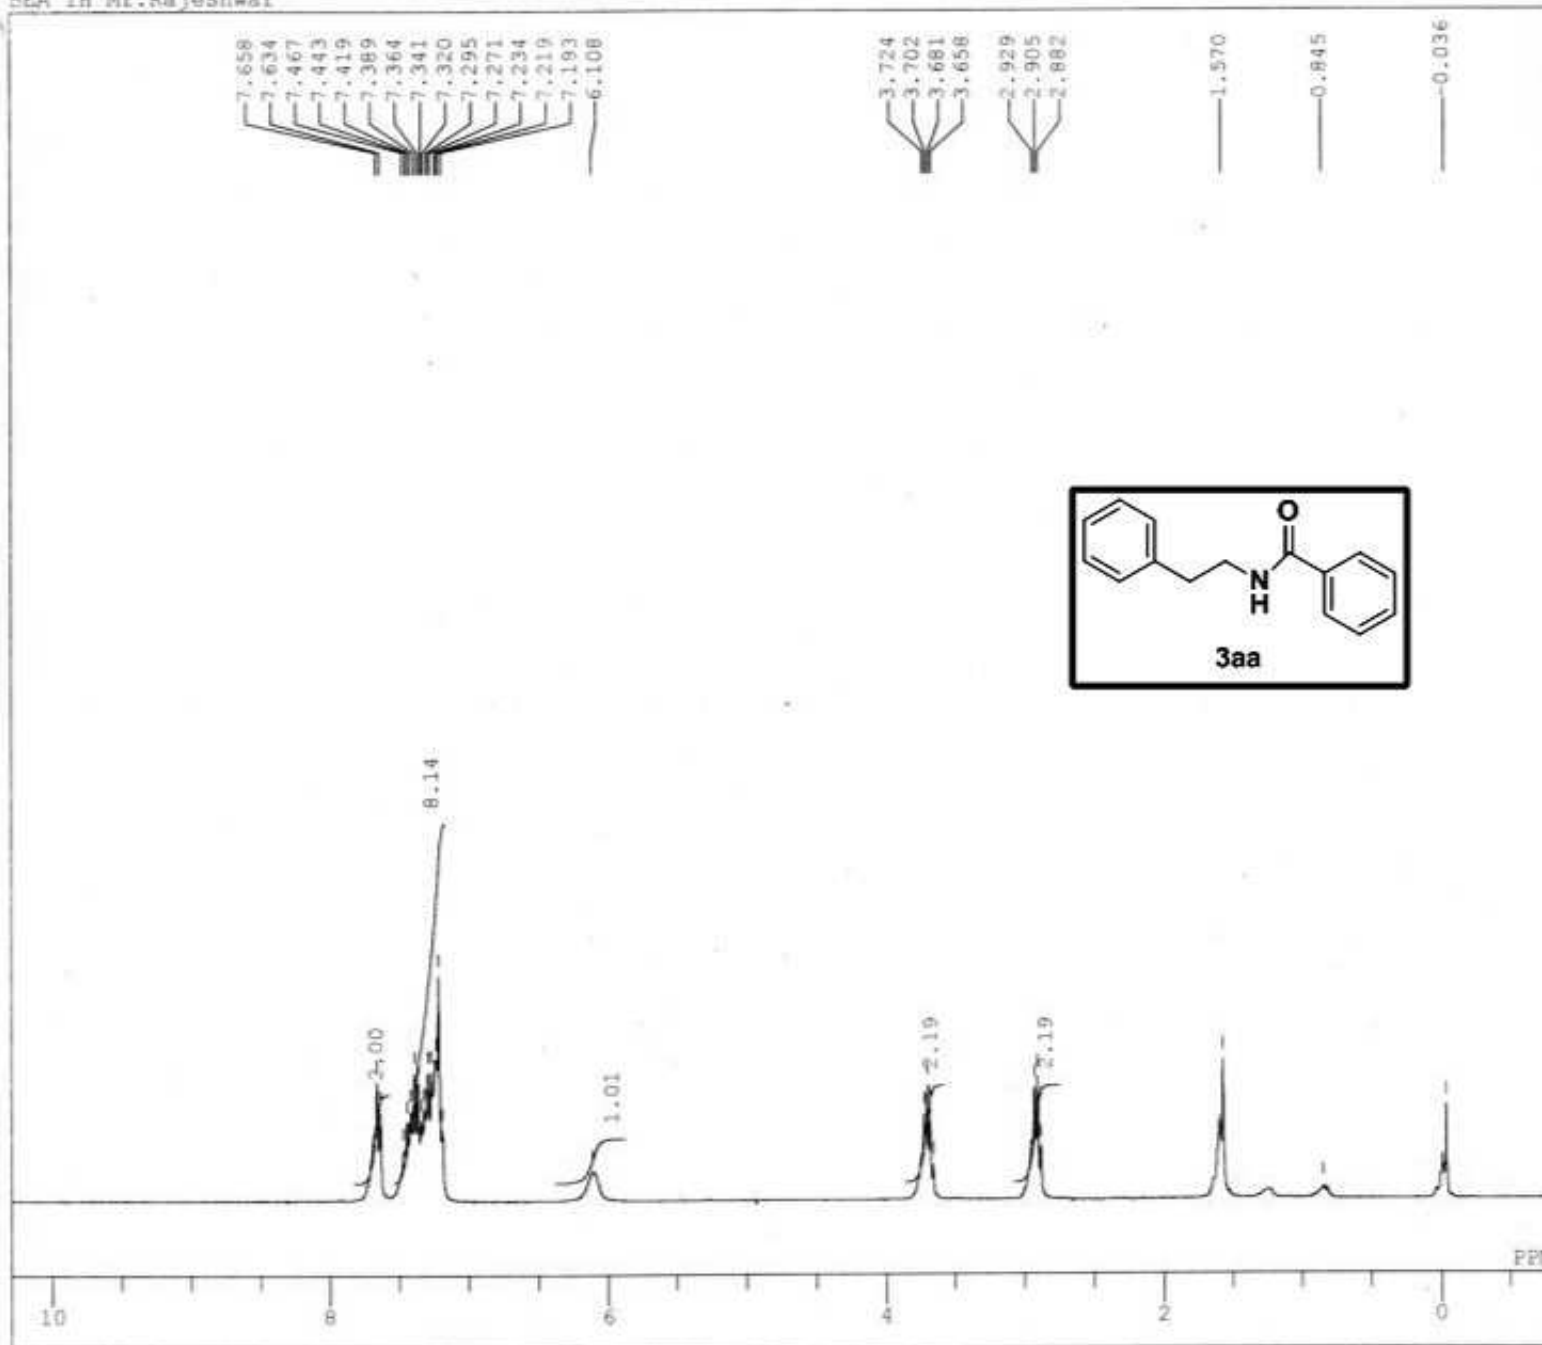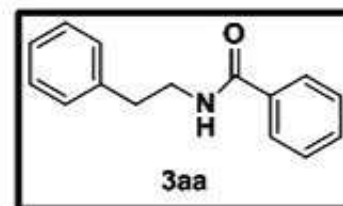

JEOL AL300 FTNMR  
CHEMISTRY DEPARTMENT  
Banaras Hindu University,  
VARANASI-221005

Operator : Nagendra Kumar  
Shishir Singh

DFILE C:\K.N. Singh,,I.T\BEA\_1H.a1  
COMNT BEA\_1H\_Mr.Rajeshwar  
DATIM Thu Sep 13 11:17:49 2012  
OBNUC 1H  
EXMOD NON  
OBFRQ 300.40 MHz  
OBSET 130.00 KHz  
OBFIN 1150.0 Hz  
POINT 32768  
FREQU 9505.7 Hz  
SCANS 16  
ACQTM 3.447 sec  
PD 1.547 sec  
PW1 5.2 us  
IRNUC 1H  
CTEMP 18.4 c  
SLVNT CDCL3  
EXREF 0.00 ppm  
BF 1.20 Hz  
RGAIN 21

BE 13C Mr. Bharat Kumar

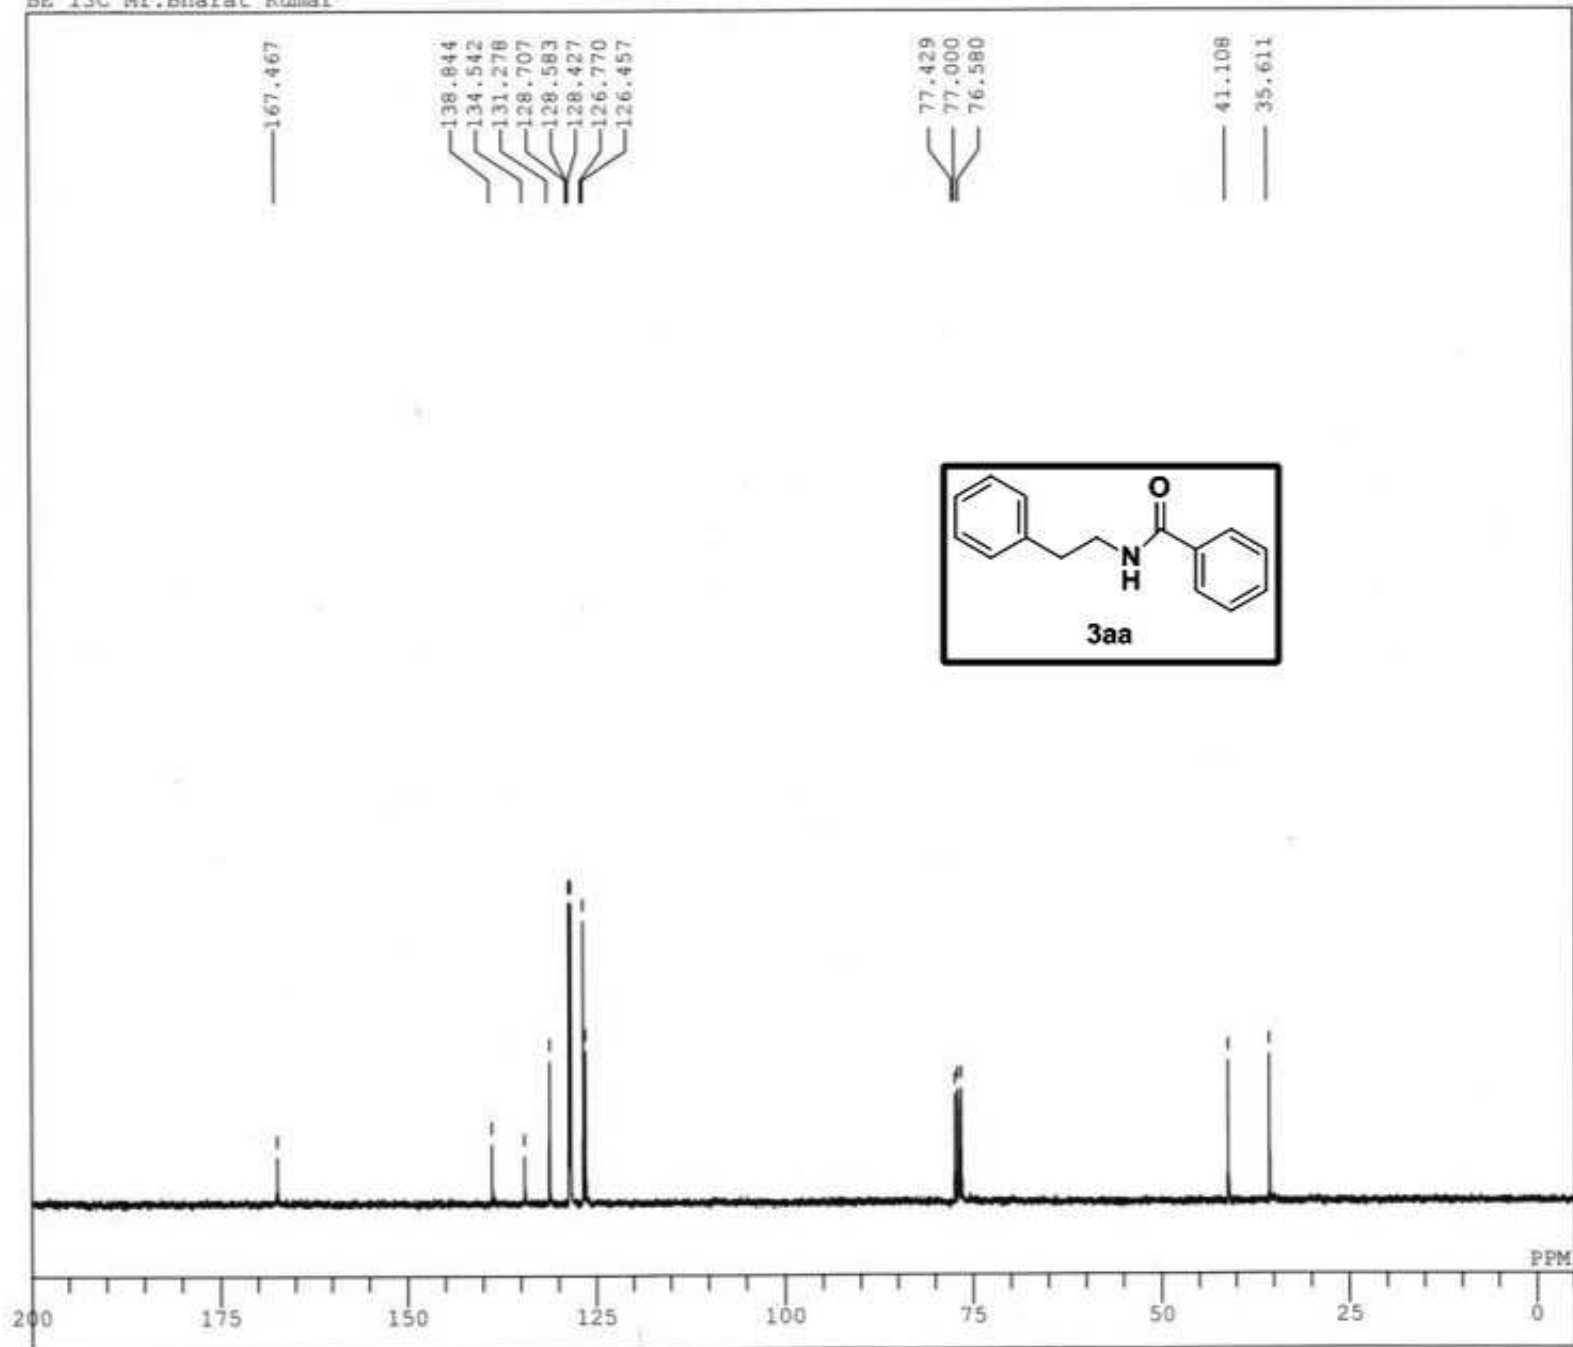

JEOL AL300 FTNMR  
CHEMISTRY DEPARTMENT  
Banaras Hindu University,  
VARANASI-221005

Operator : Nagendra Kumar  
Shishir Singh

DFILE C:\WINNMR98\COMMON\DEFAULT.  
COMNT BE\_13C\_Mr.Bharat Kumar  
DATIM Thu Nov 29 11:08:58 2012  
OBNUC 13C  
EXMOD BCM  
OBFRQ 75.45 MHz  
OBSET 127.30 KHz  
OBFIN 44.7 Hz  
POINT 32768  
FREQU 20408.1 Hz  
SCANS 133  
ACQTM 1.606 sec  
PD 1.394 sec  
PW1 6.0 us  
IRNUC 1H  
CTEMP 20.7 c  
SLVNT CDCL3  
EXREF 77.00 ppm  
BF 1.20 Hz  
RGAIN 25

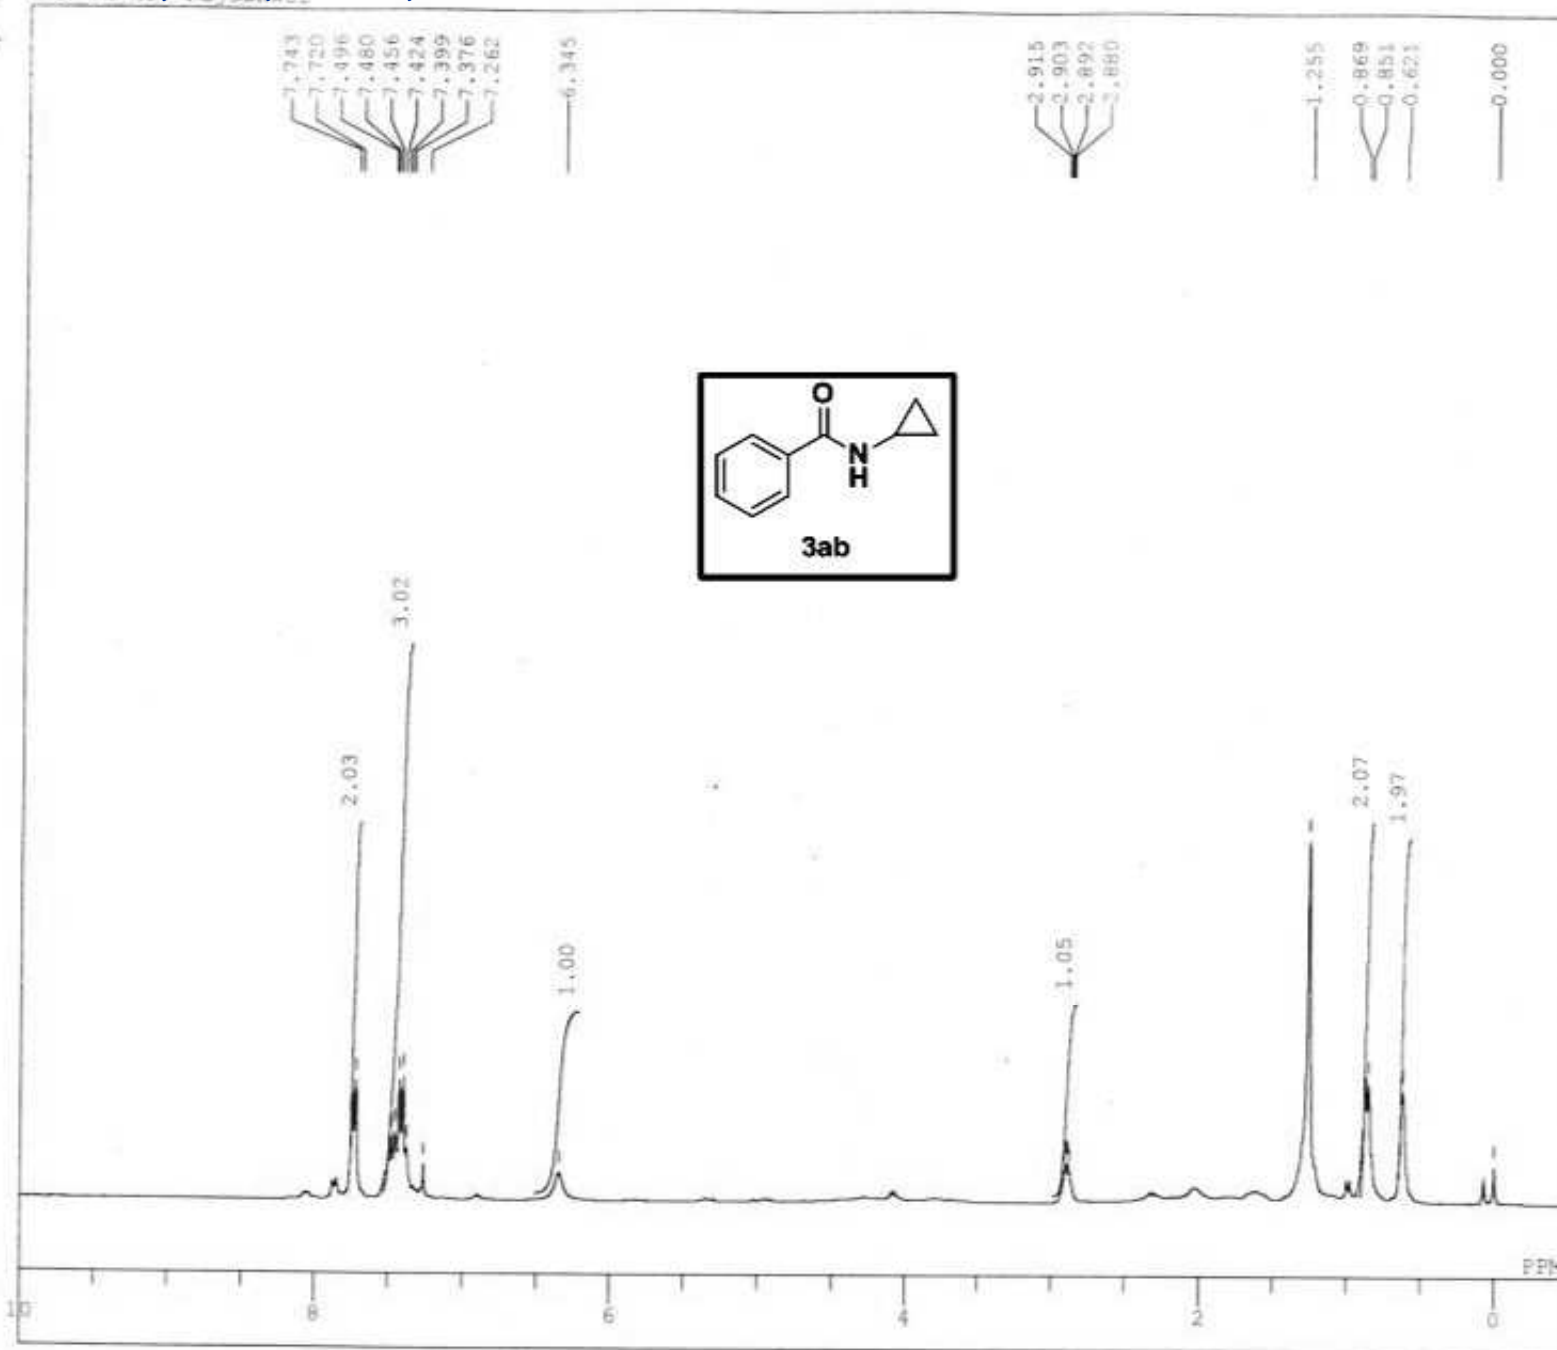

JEOL AL300 FTNMR  
CHEMISTRY DEPARTMENT  
Banaras Hindu University,  
VARANASI-221005

Operator : Nagendra Kumar  
Shishir Singh

DFILE C:\K.N. Singh,,I.T\BCP\_1H.a1  
COMNT BCP\_1H Mr. Rajeshwer  
DATIM Thu Sep 06 16:15:17 2012  
OBNUC 1H  
EXMOD NON  
OBFRQ 300.40 MHz  
OBSET 130.00 KHz  
OBFIN 1150.0 Hz  
POINT 32768  
FREQU 6016.8 Hz  
SCANS 32  
ACQTM 5.446 sec  
PD 1.547 sec  
PW1 5.2 us  
IRNUC 1H  
CTEMP 20.1 c  
SLVNT CDCL3  
EXREF 0.00 ppm  
BF 1.20 Hz  
RGAIN 14

BCP 1H Mr. Rajeshwer

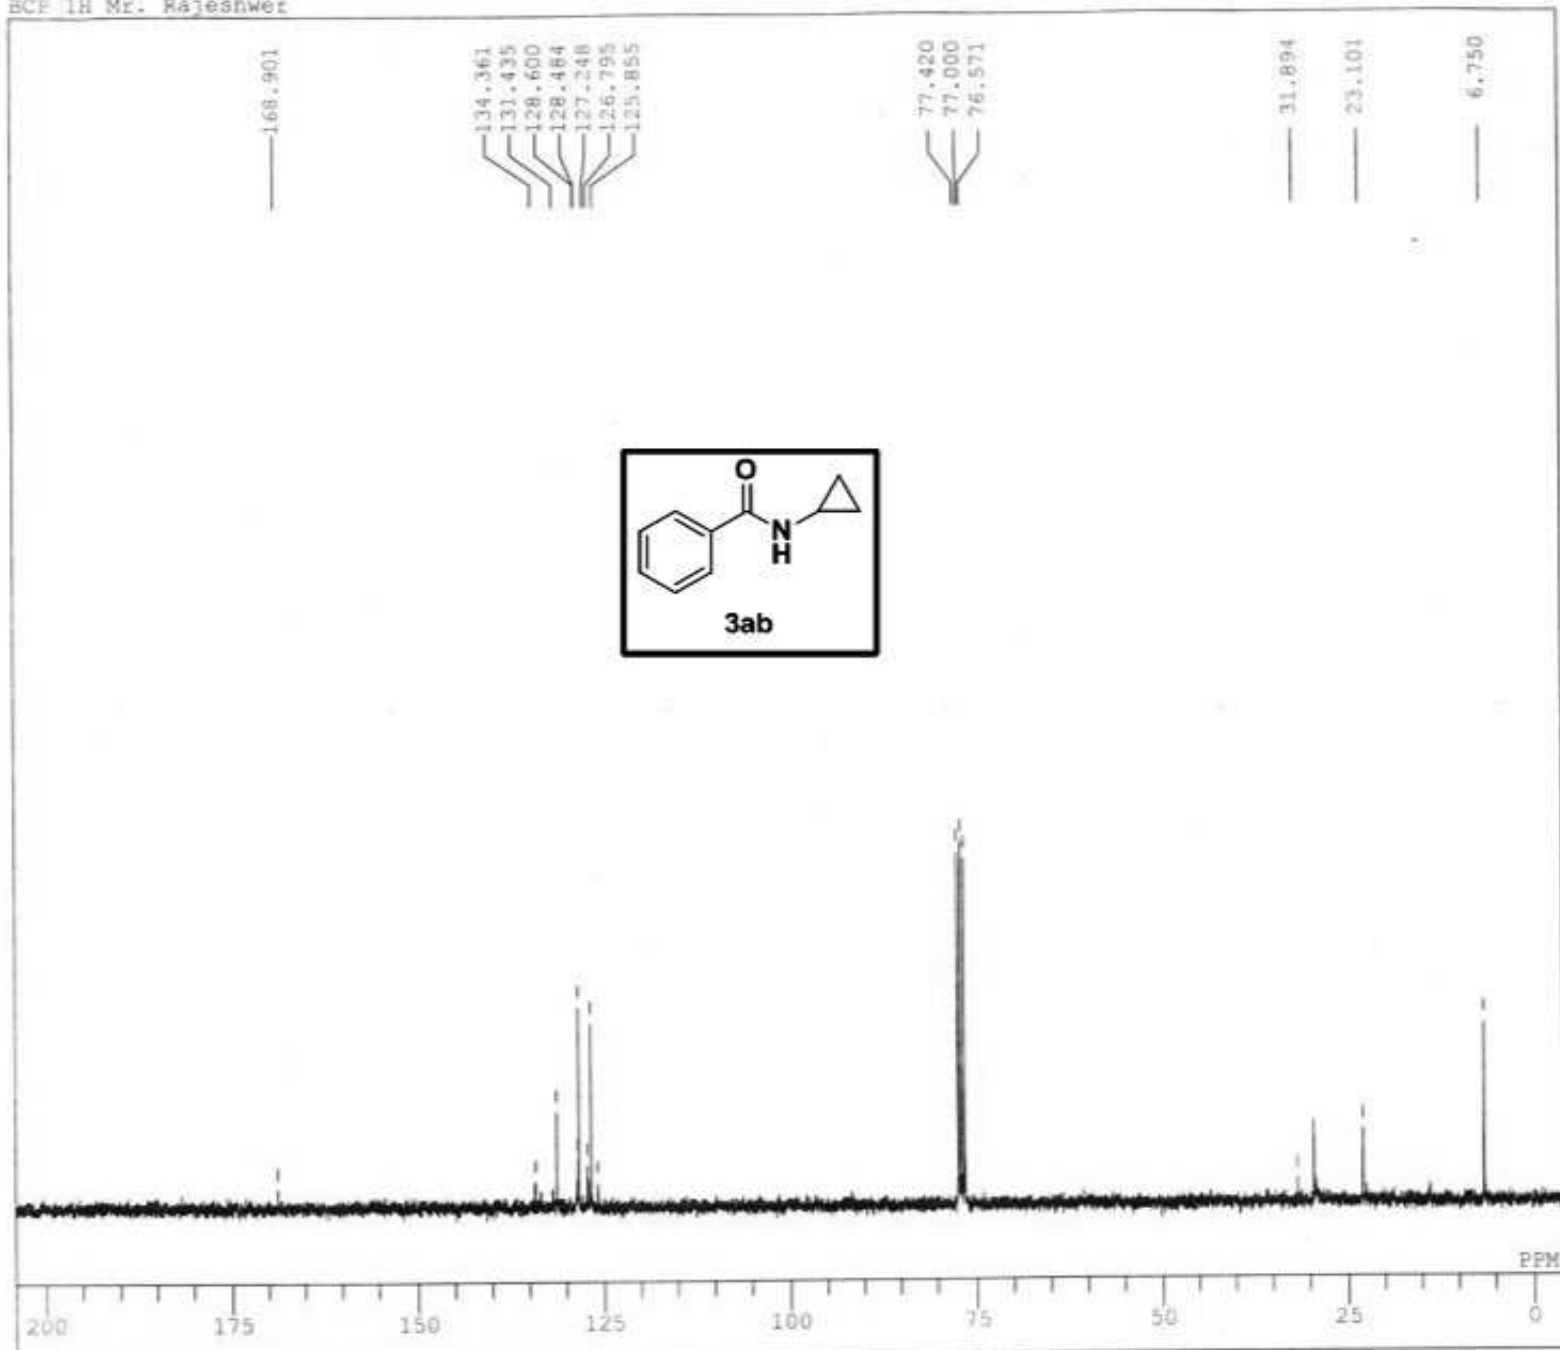

JEOL AL300 FTNMR  
CHEMISTRY DEPARTMENT  
Banaras Hindu University,  
VARANASI-221005

Operator : Nagendra Kumar  
Shishir Singh

DFILE C:\K.W. Singh,,I.T\BCP\_13C.e  
COMNT BCP\_1H\_Mr. Rajeshwer  
DATIM Thu Sep 06 16:28:09 2012  
OBNUC 13C  
EXMOD BCM  
OBFRQ 75.45 MHz  
OBSET 127.30 KHz  
OBFIN 44.7 Hz  
POINT 32768  
FREQU 20408.1 Hz  
SCANS 250  
ACQTM 1.606 sec  
PD 1.394 sec  
PW1 6.0 us  
IRNUC 1H  
CTEMP 20.7 c  
SLVNT CDCL3  
EXREF 77.00 ppm  
BF 1.20 Hz  
RGAIN 25



C:\K.N. Singh,,I.T\BHA\_1H.als  
BHA\_1H Mr. Rajeshwer

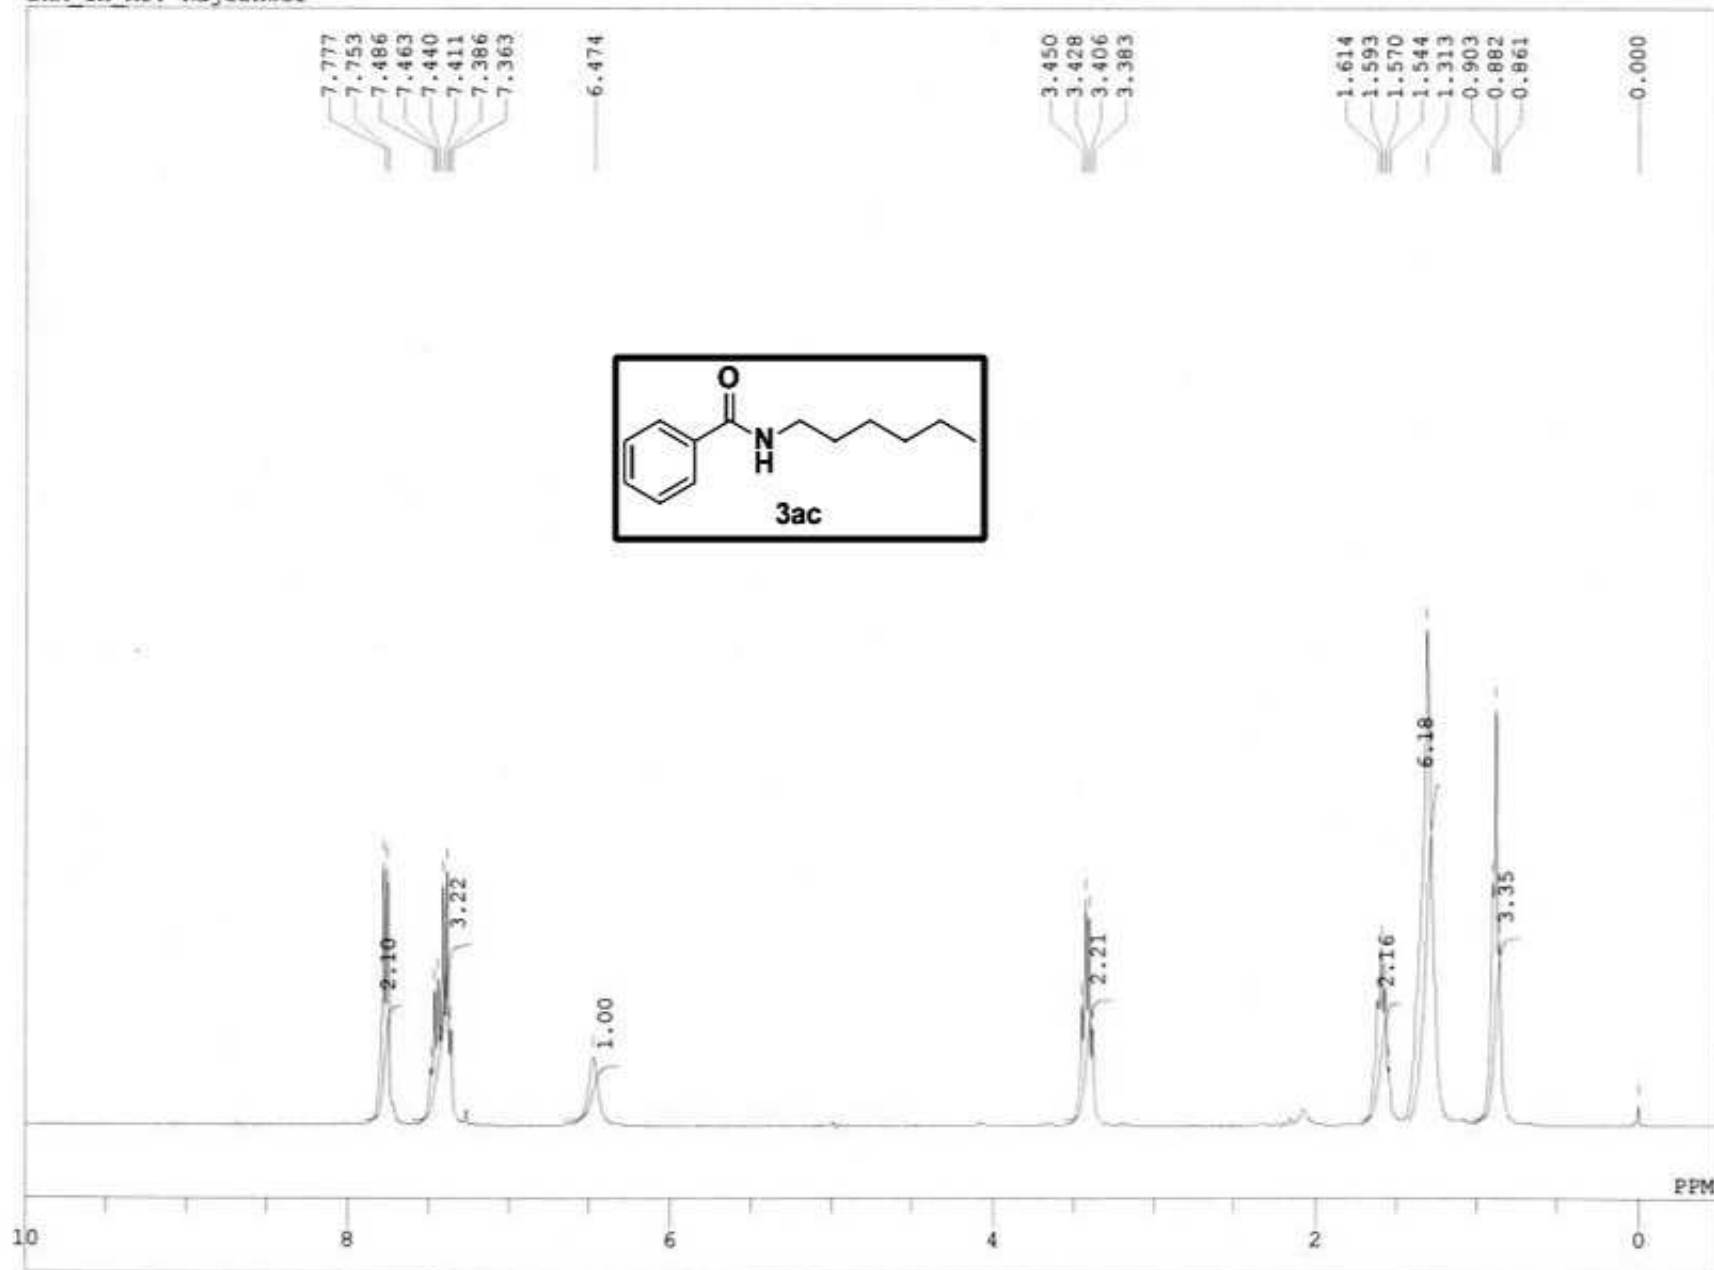

JEOL AL300 FTNMR  
CHEMISTRY DEPARTMENT  
Banaras Hindu University  
VARANASI-221005

Operator : Nagendra Kuma  
Shishir Singh

DFILE C:\K.N. Singh,,I.  
COMNT BHA\_1H\_Mr. Rajesh  
DATIM Thu Sep 13 12:13:  
OBNUC 1H  
EXMOD NON  
OBFRQ 300.40 MHz  
OBSET 130.00 KHz  
OBFIN 1150.0 Hz  
POINT 32768  
FREQU 9505.7 Hz  
SCANS 16  
ACQTM 3.447 sec  
PD 1.547 sec  
PW1 5.2 us  
IRNUC 1H  
CTEMP 18.9 c  
SLVNT CDCL3  
EXREF 0.00 ppm  
BF 1.20 Hz  
RGAIN 12

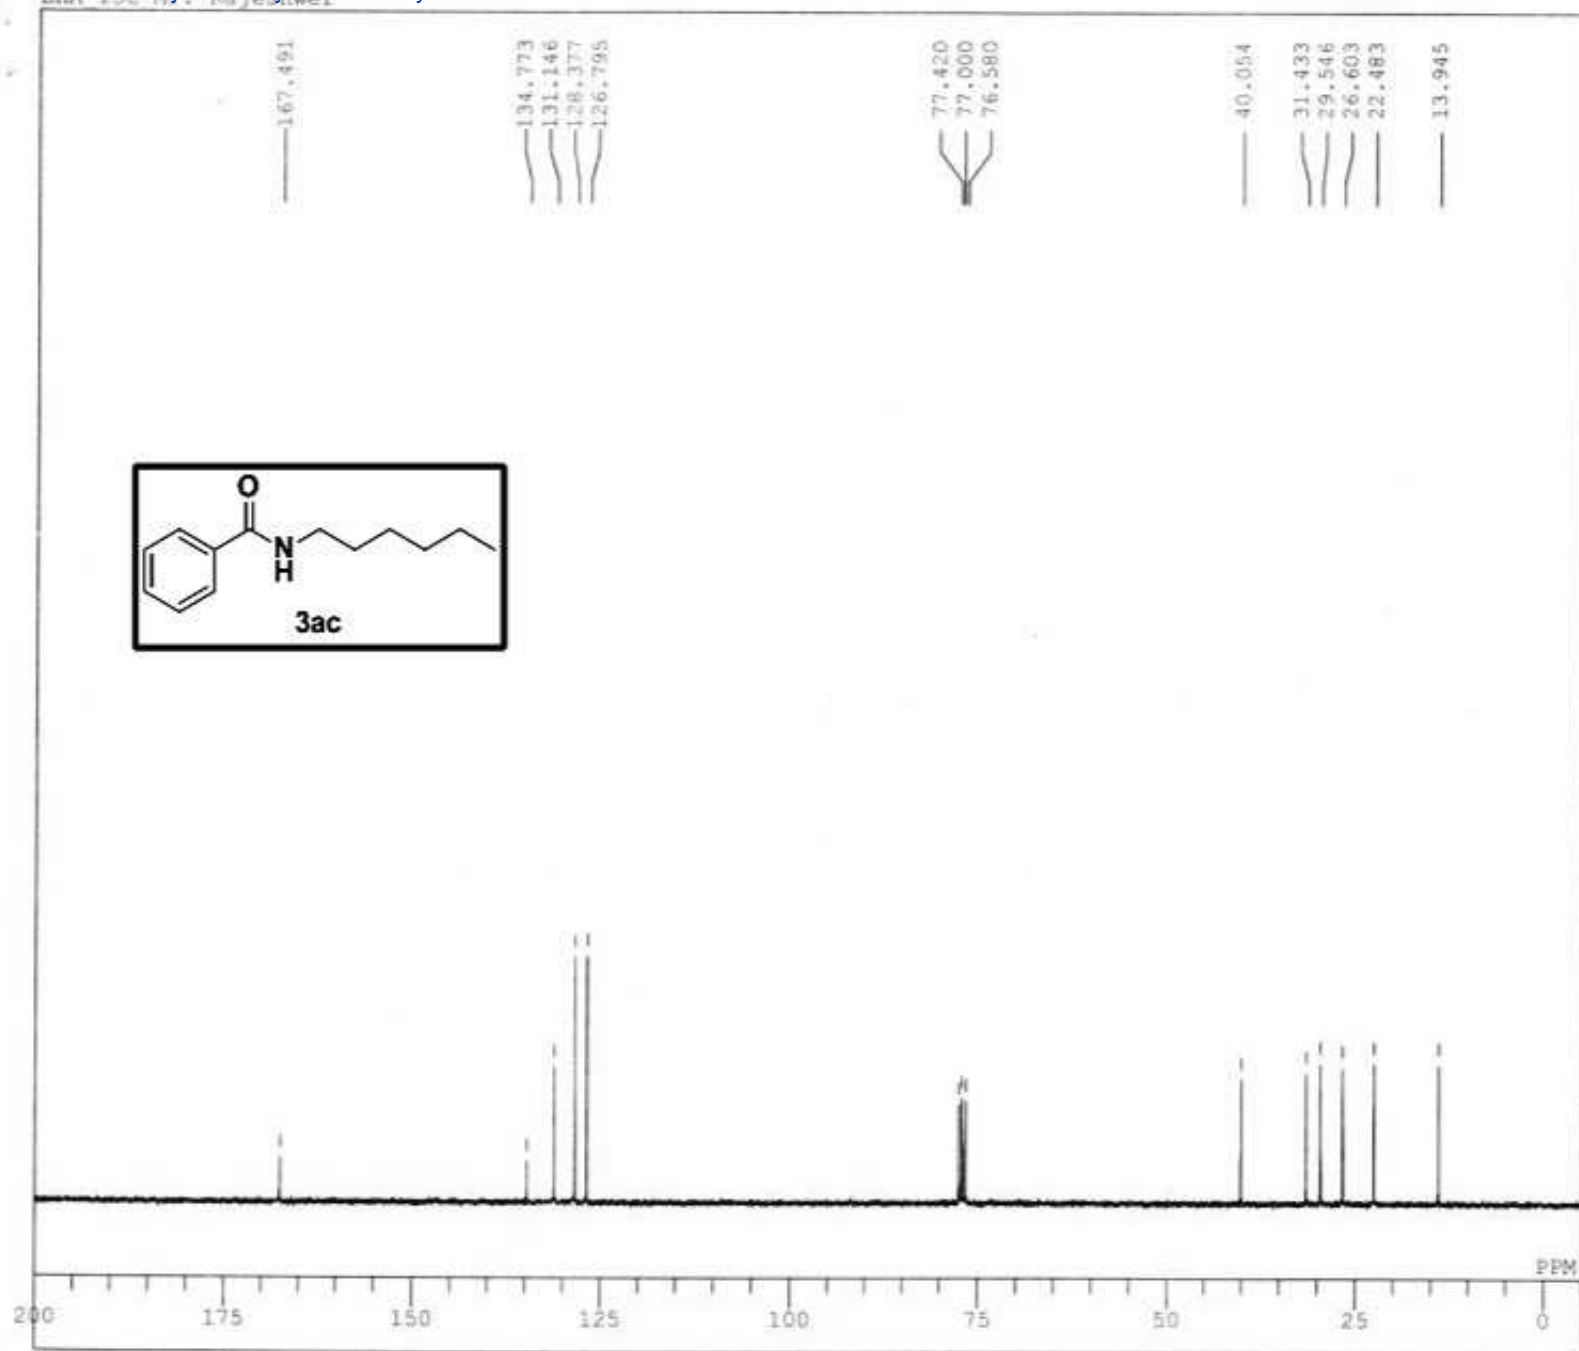

JEOL AL300 FTNMR  
CHEMISTRY DEPARTMENT  
Banaras Hindu University,  
VARANASI-221005

Operator : Nagendra Kumar  
Shishir Singh

DFILE C:\WINNMR98\COMMON\\_DEFAULT.  
COMNT BHA\_13C Mr. Rajeshwer  
DATIM Thu Sep 13 12:23:53 2012  
OBNUC 13C  
EXMOD BCM  
OBFRQ 75.45 MHz  
OBSET 127.30 KHz  
OBFIN 44.7 Hz  
POINT 32768  
FREQU 20408.1 Hz  
SCANS 120  
ACQTM 1.606 sec  
PD 1.394 sec  
PW1 6.0 us  
IRNUC 1H  
CTEMP 22.4 c  
SLVNT CDCL3  
EXREF 77.00 ppm  
BF 1.20 Hz  
RGAIN 23

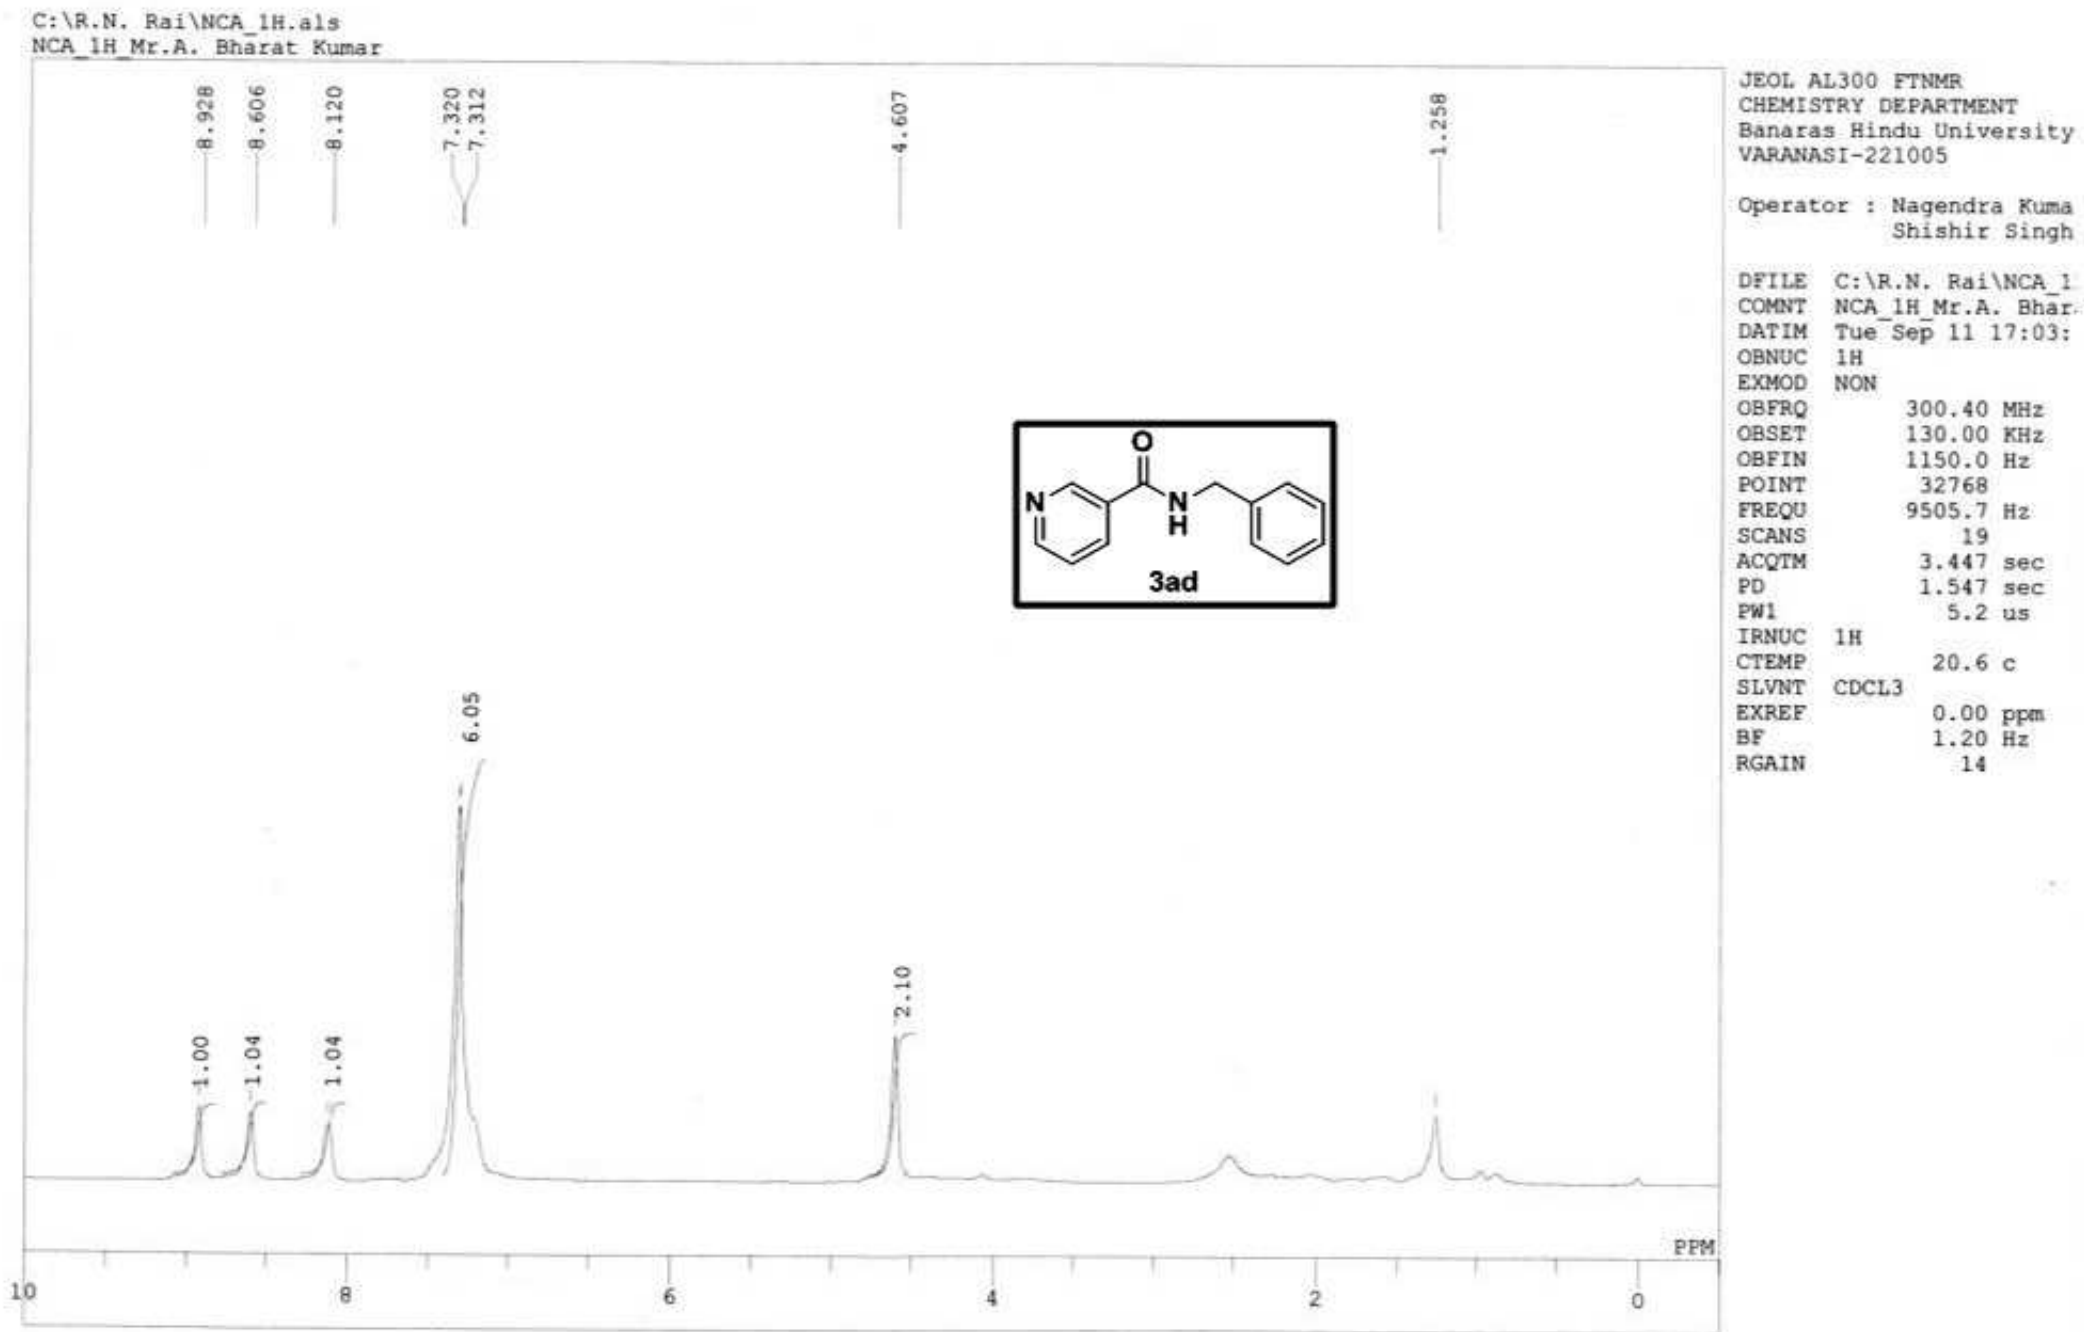

NCA 13C Mr.Manjeet Singh

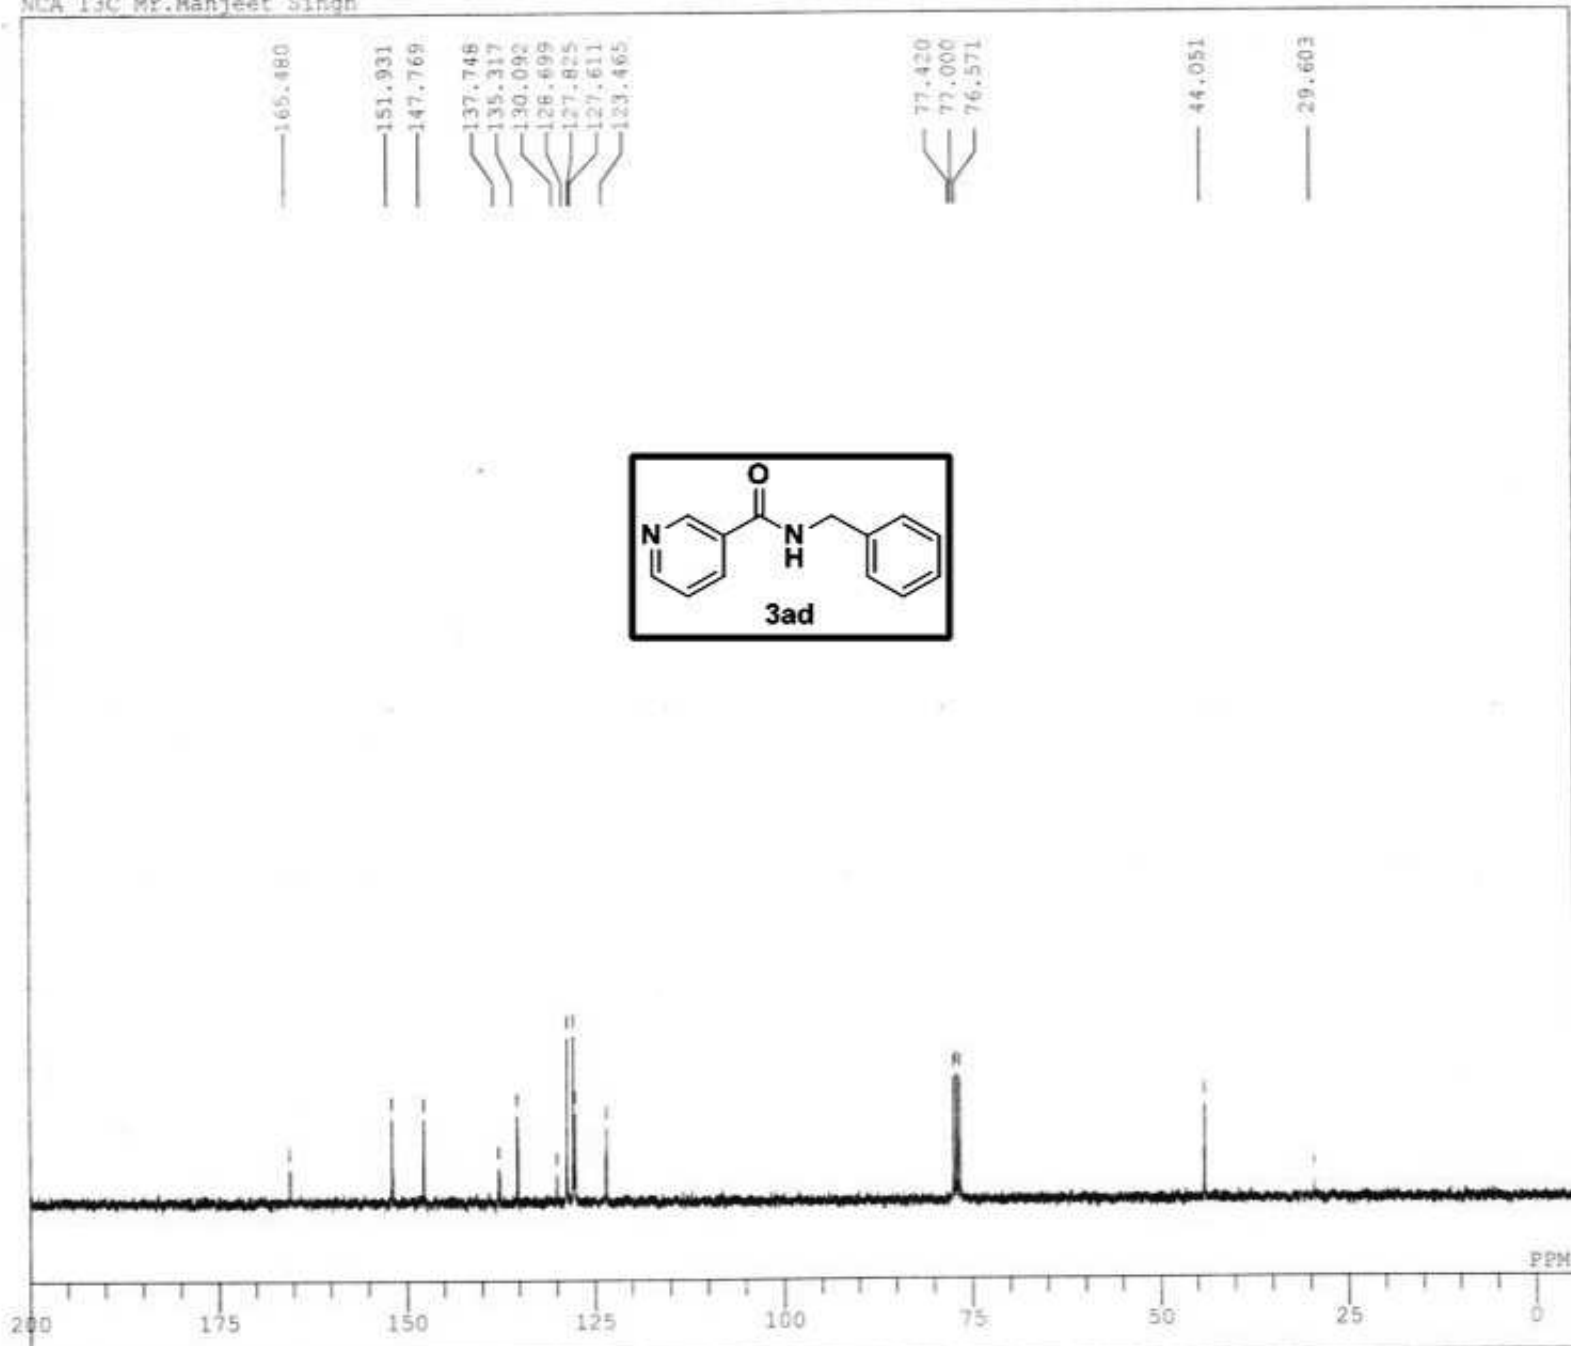

JEOL AL300 FTNMR  
CHEMISTRY DEPARTMENT  
Banaras Hindu University,  
VARANASI-221005

Operator : Nagendra Kumar  
Shishir Singh

DFILE C:\WINNMR98\COMMON\DEFAULT.  
COMNT NCA\_13C\_Mr.Manjeet\_Singh  
DATIM Tue Sep 11 17:12:31 2012  
OBNUC 13C  
EXMOD BCM  
OBFRQ 75.45 MHz  
OBSET 127.30 KHz  
OBFIN 44.7 Hz  
POINT 32768  
FREQU 20408.1 Hz  
SCANS 117  
ACQTM 1.606 sec  
PD 1.394 sec  
PW1 6.0 us  
IRNUC 1H  
CTEMP 22.8 c  
SLVNT CDCL3  
EXREF 77.00 ppm  
BF 1.20 Hz  
RGAIN 25

PBA\_1H Mr.Rajeshwar

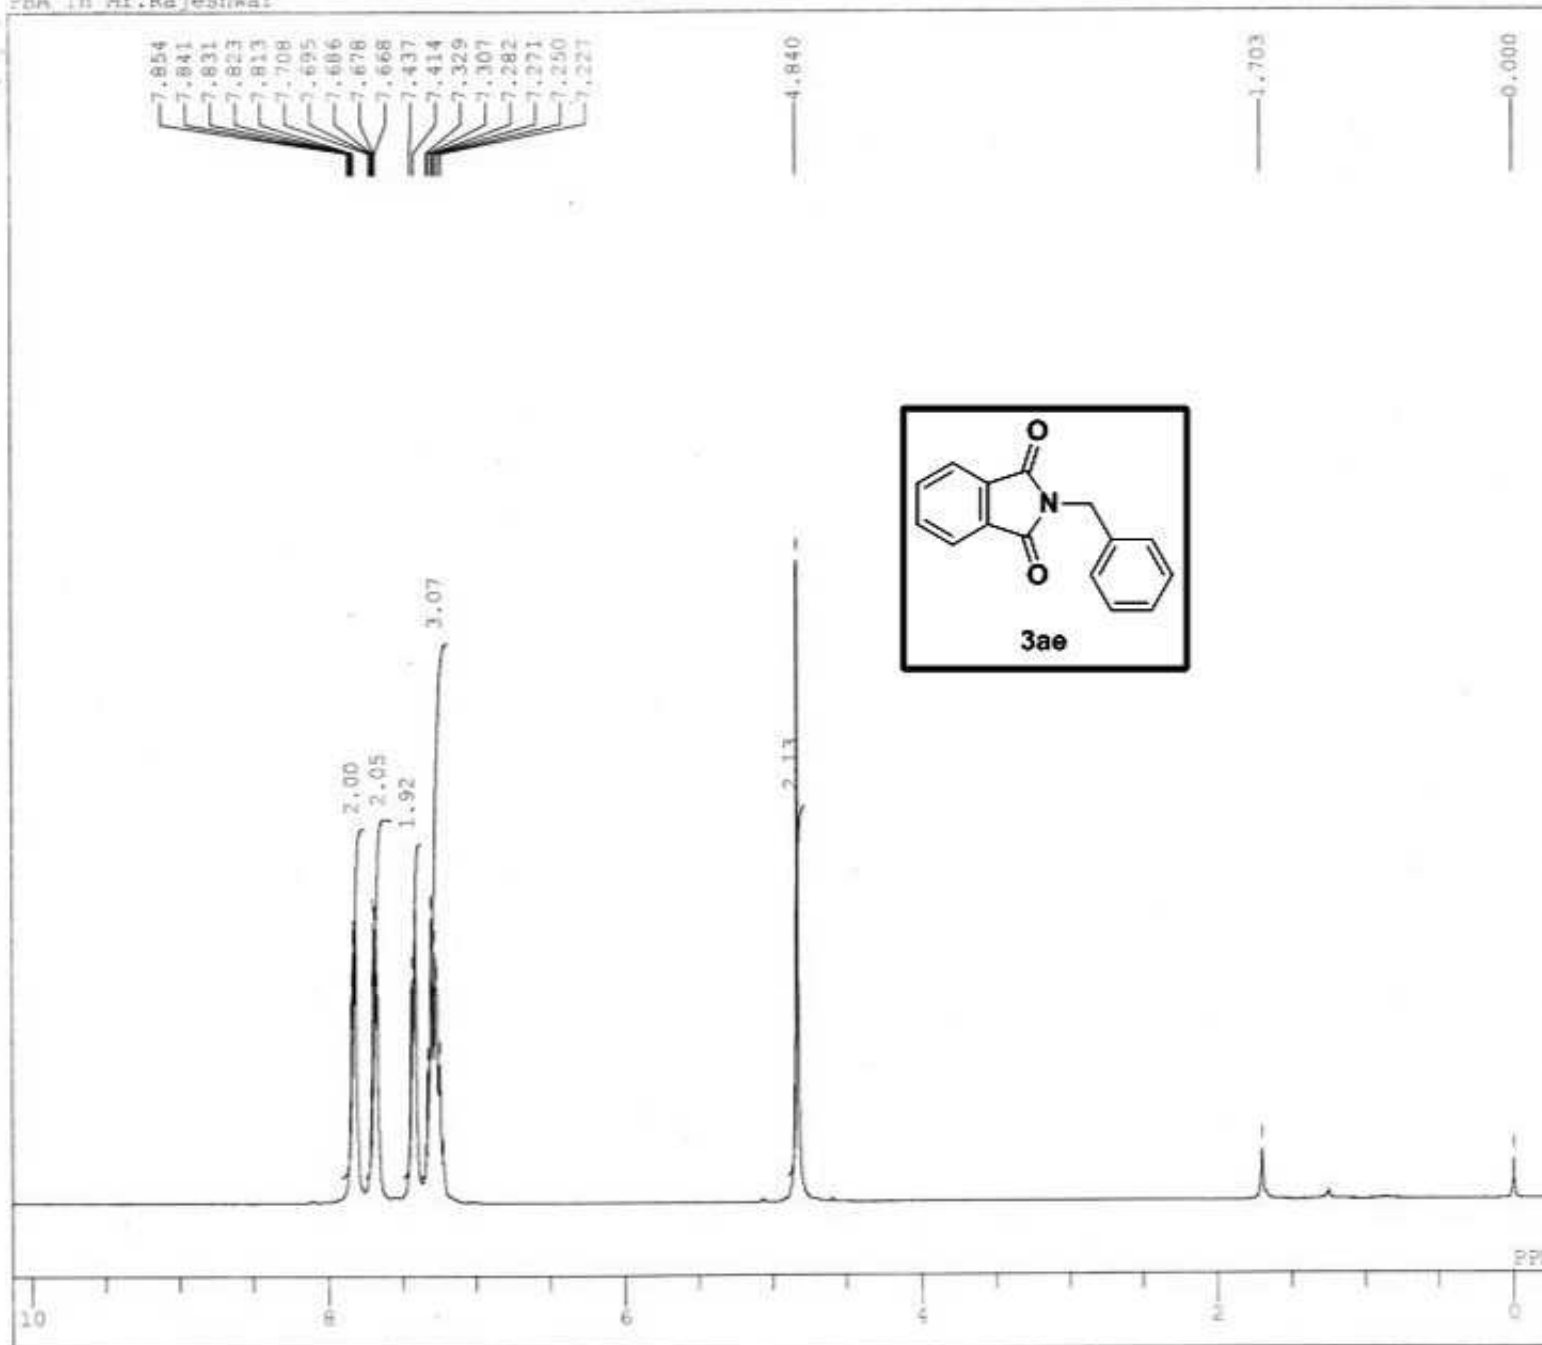

JEOL AL300 FTNMR  
CHEMISTRY DEPARTMENT  
Banaras Hindu University,  
VARANASI-221005

Operator : Nagendra Kumar  
Shishir Singh

DFILE C:\K.N. Singh,,I.T\PBA\_1H.a1  
COMNT PBA\_1H Mr.Rajeshwar  
DATIM Thu Jul 05 14:40:30 2012  
OBNUC 1H  
EXMOD NON  
OBFRQ 300.40 MHz  
OBSET 130.00 KHz  
OBFIN 1150.0 Hz  
POINT 32768  
FREQU 6016.8 Hz  
SCANS 32  
ACQTM 5.446 sec  
PD 1.547 sec  
PW1 5.2 us  
IRNUC 1H  
CTEMP 21.8 c  
SLVNT CDCL3  
EXREF 0.00 ppm  
BF 1.20 Hz  
RGAIN 14

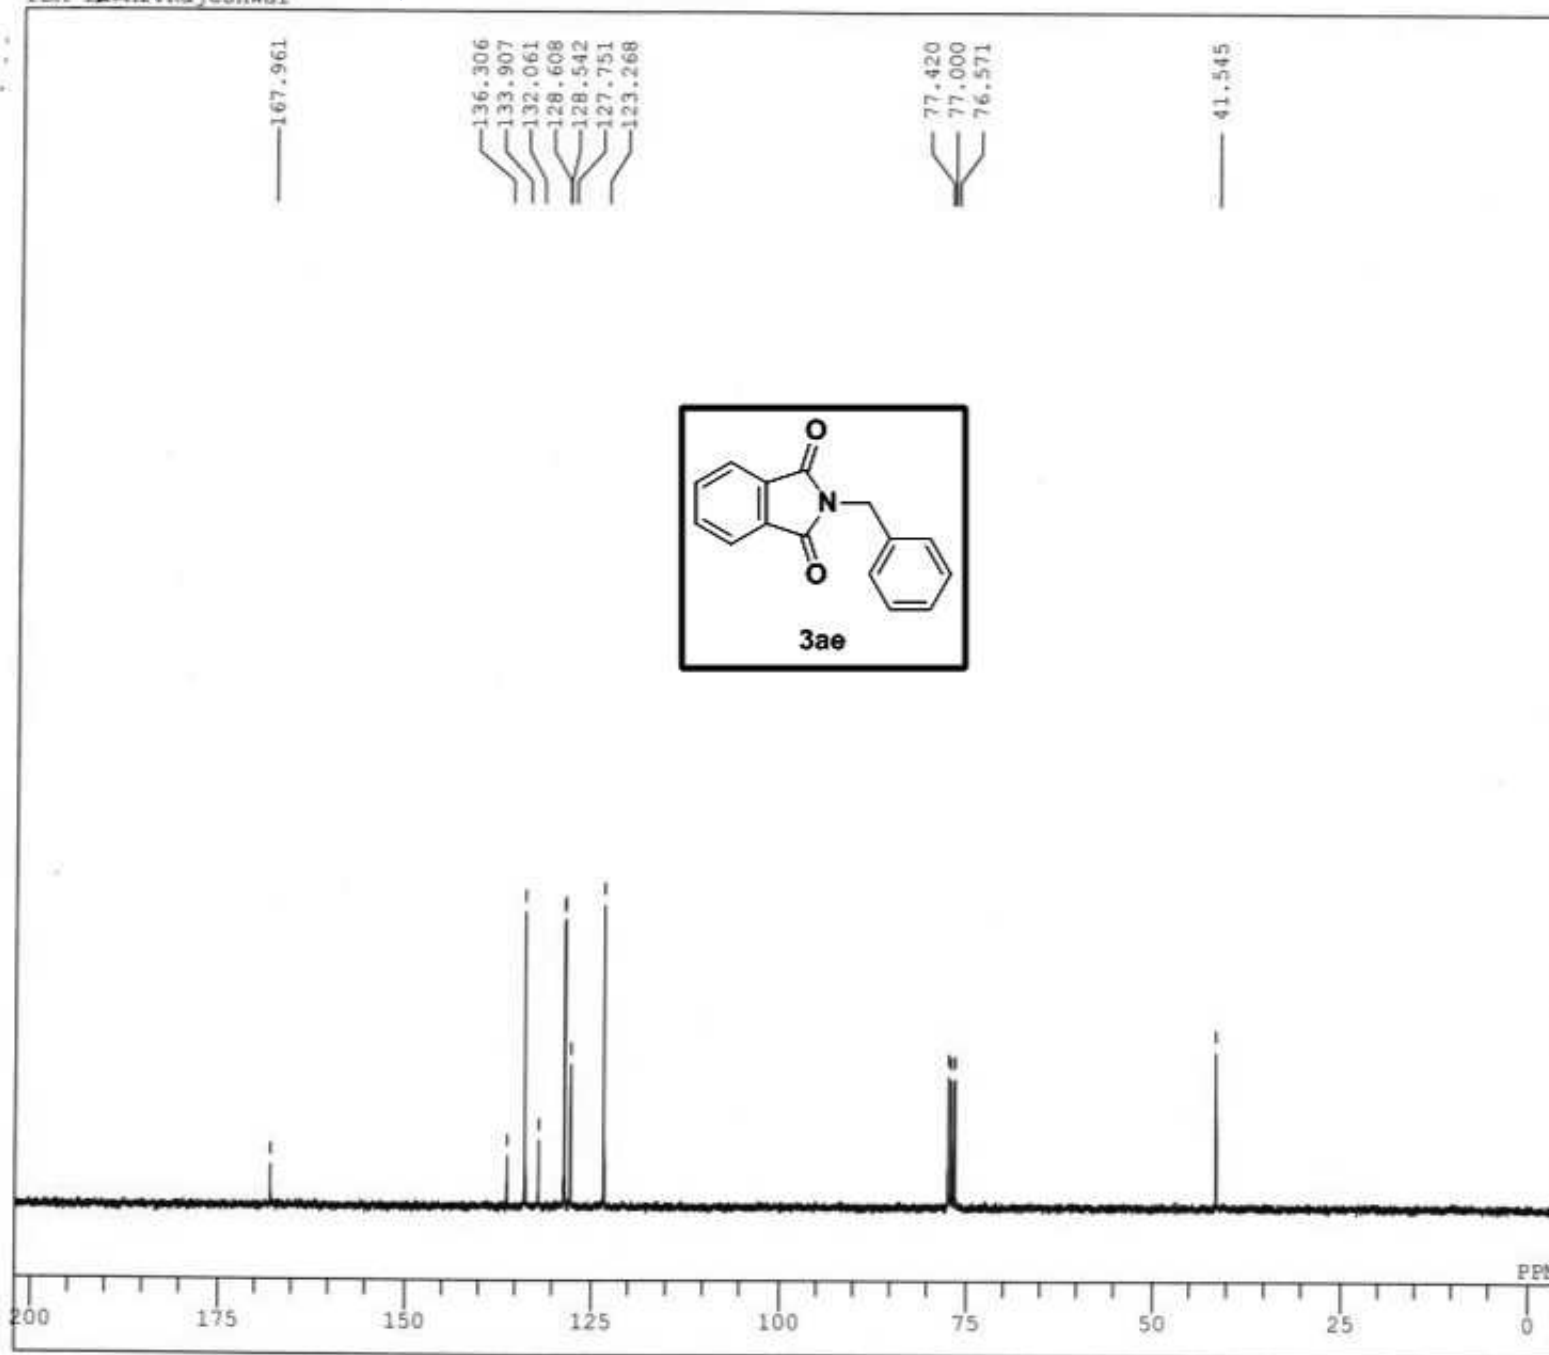

JEOL AL300 FTNMR  
CHEMISTRY DEPARTMENT  
Banaras Hindu University,  
VARANASI-221005

Operator : Nagendra Kumar  
Shishir Singh

DFILE C:\WINNMR98\Data\PBA\_1H2BCM\_  
COMNT PBA\_1H Mr.Rajeshwar  
DATIM Thu Jul 05 14:48:20 2012  
OBNUC 13C  
EXMOD BCM  
OBFREQ 75.45 MHz  
OBSET 127.30 KHz  
OBFIN 44.7 Hz  
POINT 32768  
FREQU 20408.1 Hz  
SCANS 150  
ACQTM 1.606 sec  
PD 1.394 sec  
PW1 6.0 us  
IRNUC 1H  
CTEMP 22.4 c  
SLVNT CDCL3  
EXREF 77.00 ppm  
BF 1.20 Hz  
RGAIN 23

C:\K.N. Singh,, I.T\PhCY\_1H.als  
PhCY\_1H Mr. Rajeshwer

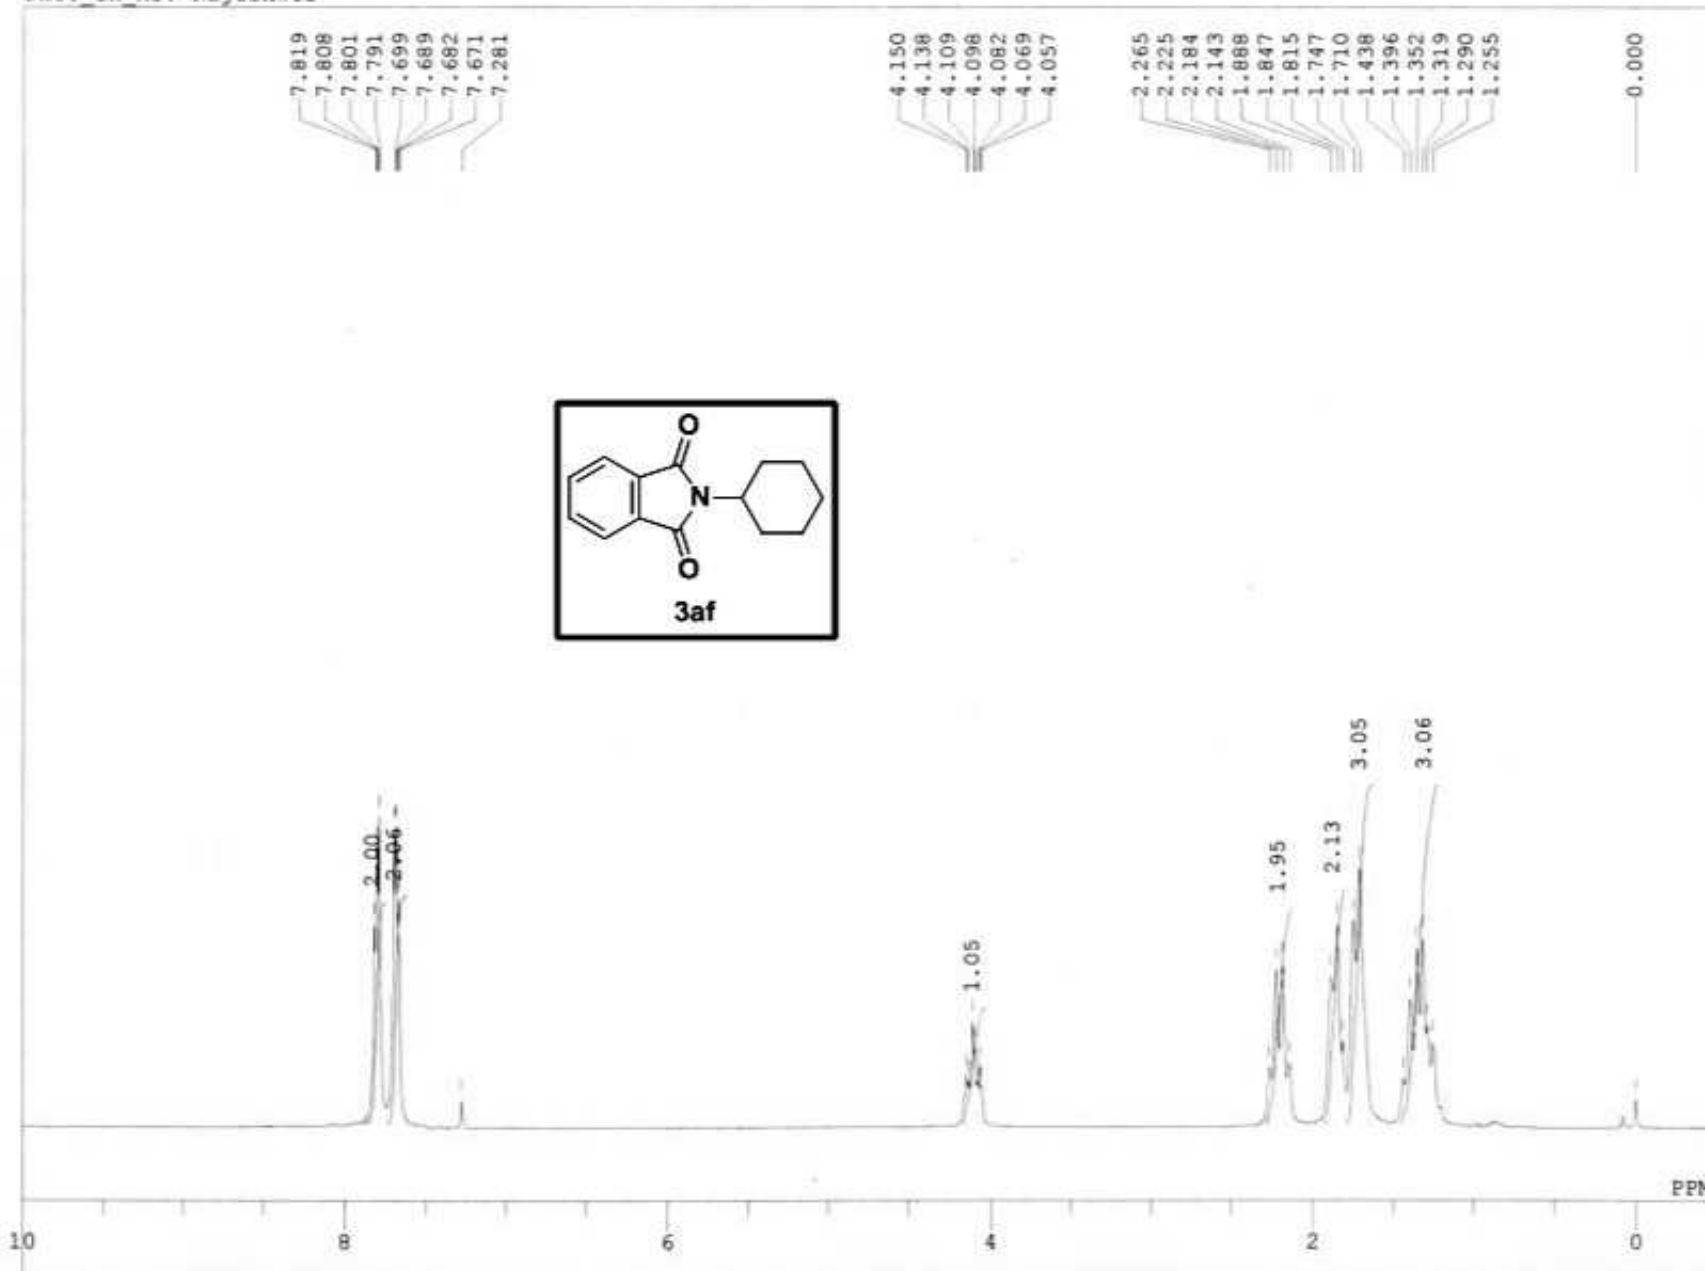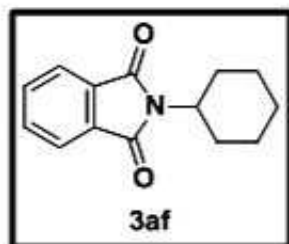

JEOL AL300 FTNMR  
CHEMISTRY DEPARTMENT  
Banaras Hindu University  
VARANASI-221005

Operator : Nagendra Kuma  
Shishir Singh

DFILE C:\K.N. Singh,, I.  
COMNT PhCY\_1H Mr. Rajes  
DATIM Mon Jul 30 15:34:  
OBNUC 1H  
EXMOD NON  
OBFRQ 300.40 MHz  
OBSET 130.00 KHz  
OBFIN 1150.0 Hz  
POINT 32768  
FREQU 9505.7 Hz  
SCANS 16  
ACQTM 3.447 sec  
PD 1.547 sec  
PW1 5.2 us  
IRNUC 1H  
CTEMP 21.9 c  
SLVNT CDCL3  
EXREF 0.00 ppm  
BF 1.20 Hz  
RGAIN 11

1 PhCY 13C Mr. Rajeshwer

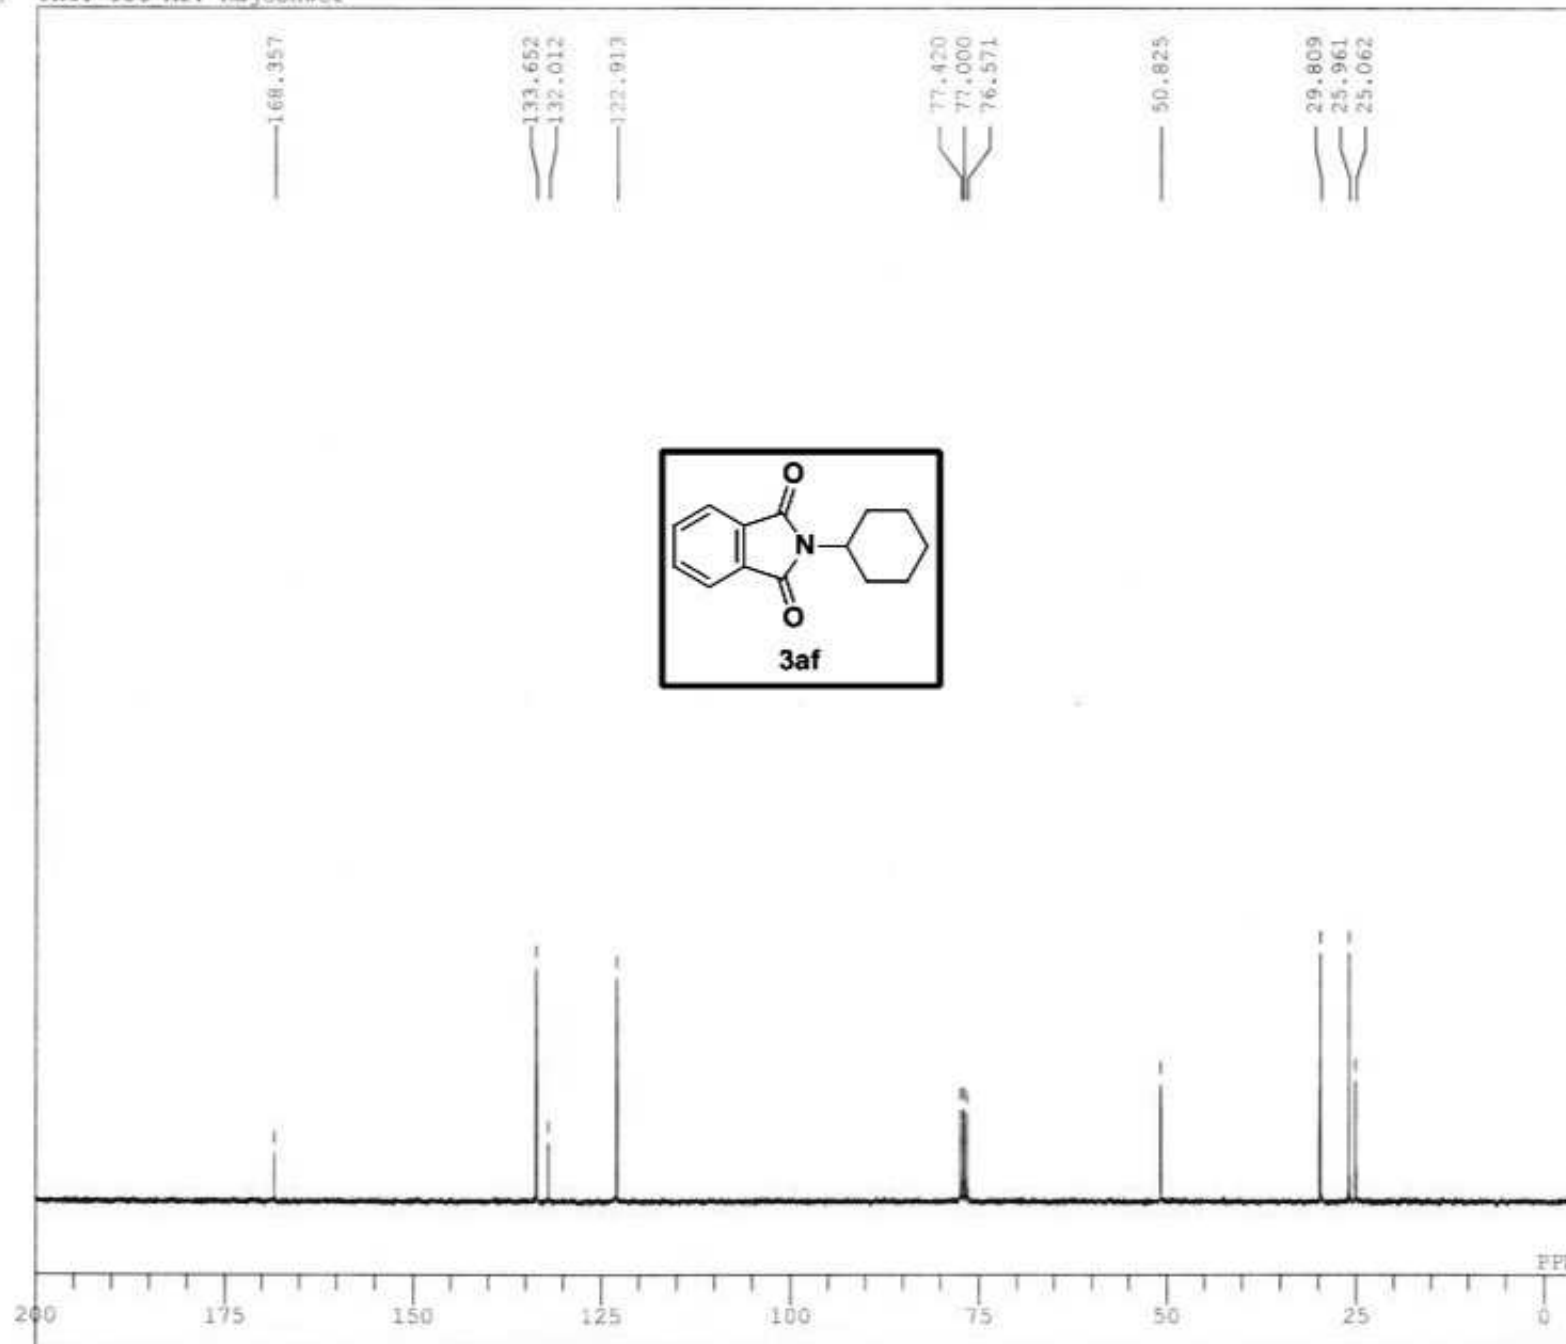

JEOL AL300 FTNMR  
CHEMISTRY DEPARTMENT  
Banaras Hindu University,  
VARANASI-221005

Operator : Nagendra Kumar  
Shishir Singh

DFILE C:\K.N. Singh,,I.T\PhCY 13C.  
COMNT PhCY 13C Mr. Rajeshwer  
DATIM Mon Jul 30 16:09:30 2012  
OBNUC 13C  
EXMOD BCM  
OBFRQ 75.45 MHz  
OBSET 127.30 KHz  
OBFIN 44.7 Hz  
POINT 32768  
FREQU 20408.1 Hz  
SCANS 100  
ACQTM 1.606 sec  
PD 1.394 sec  
PW1 6.0 us  
IRNUC 1H  
CTEMP 22.6 c  
SLVNT CDCL3  
EXREF 77.00 ppm  
BF 1.20 Hz  
RGAIN 25



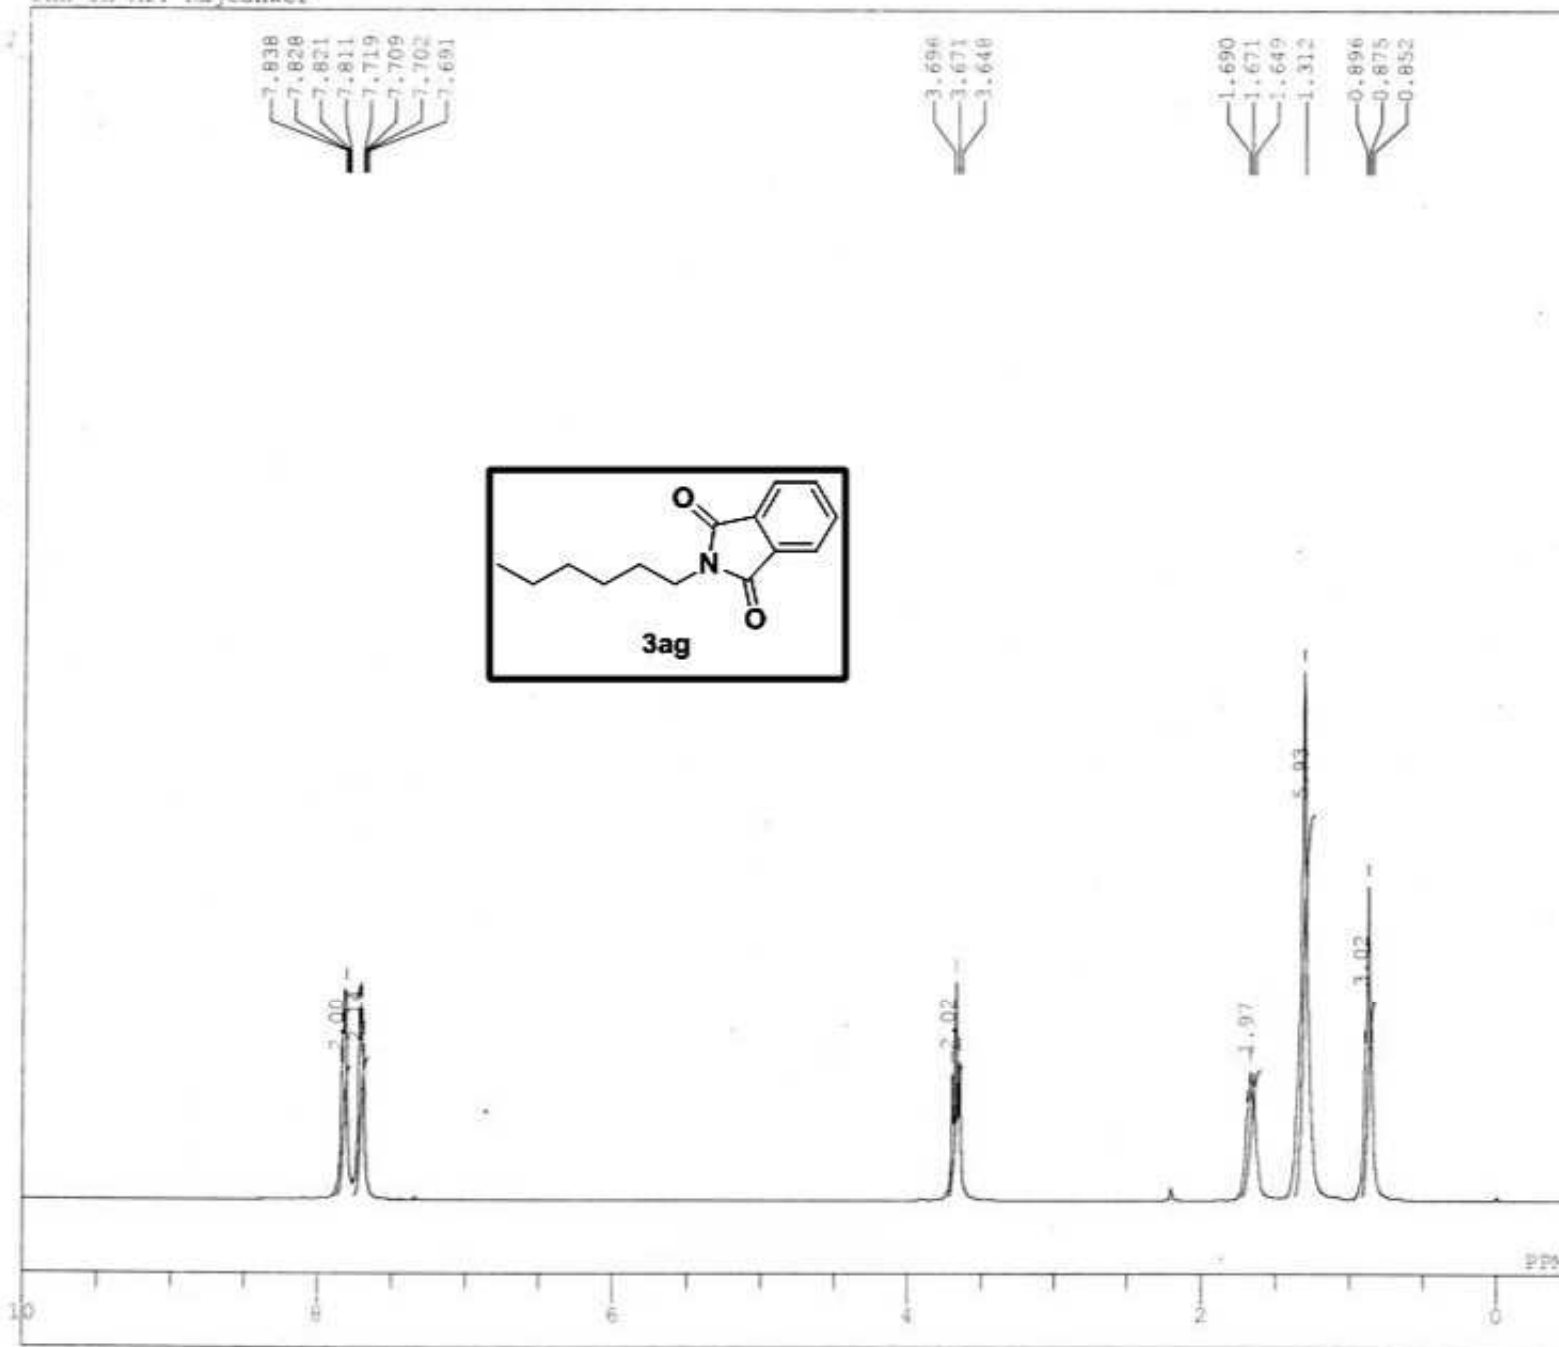

JEOL AL300 FTNMR  
CHEMISTRY DEPARTMENT  
Banaras Hindu University,  
VARANASI-221005

Operator : Nagendra Kumar  
Shishir Singh

DFILE C:\K.N. Singh,,I.T\PHH\_1H.a1  
COMNT PHH\_1H\_Mr. Rajeshwer  
DATIM Tue Sep 11 13:11:23 2012  
OBNUC 1H  
EXMOD NON  
OBFRO 300.40 MHz  
OBSET 130.00 MHz  
OBFIN 1150.0 Hz  
POINT 32768  
FREQU 9505.7 Hz  
SCANS 16  
ACQTM 3.447 sec  
PD 1.547 sec  
PWI 5.2 us  
IRNUC 1H  
CTEMP 20.0 c  
SLVNT CDCL3  
EXREF 0.00 ppm  
BF 1.20 Hz  
RGAIN 7

PHH 13C Mr. Rajeshwer

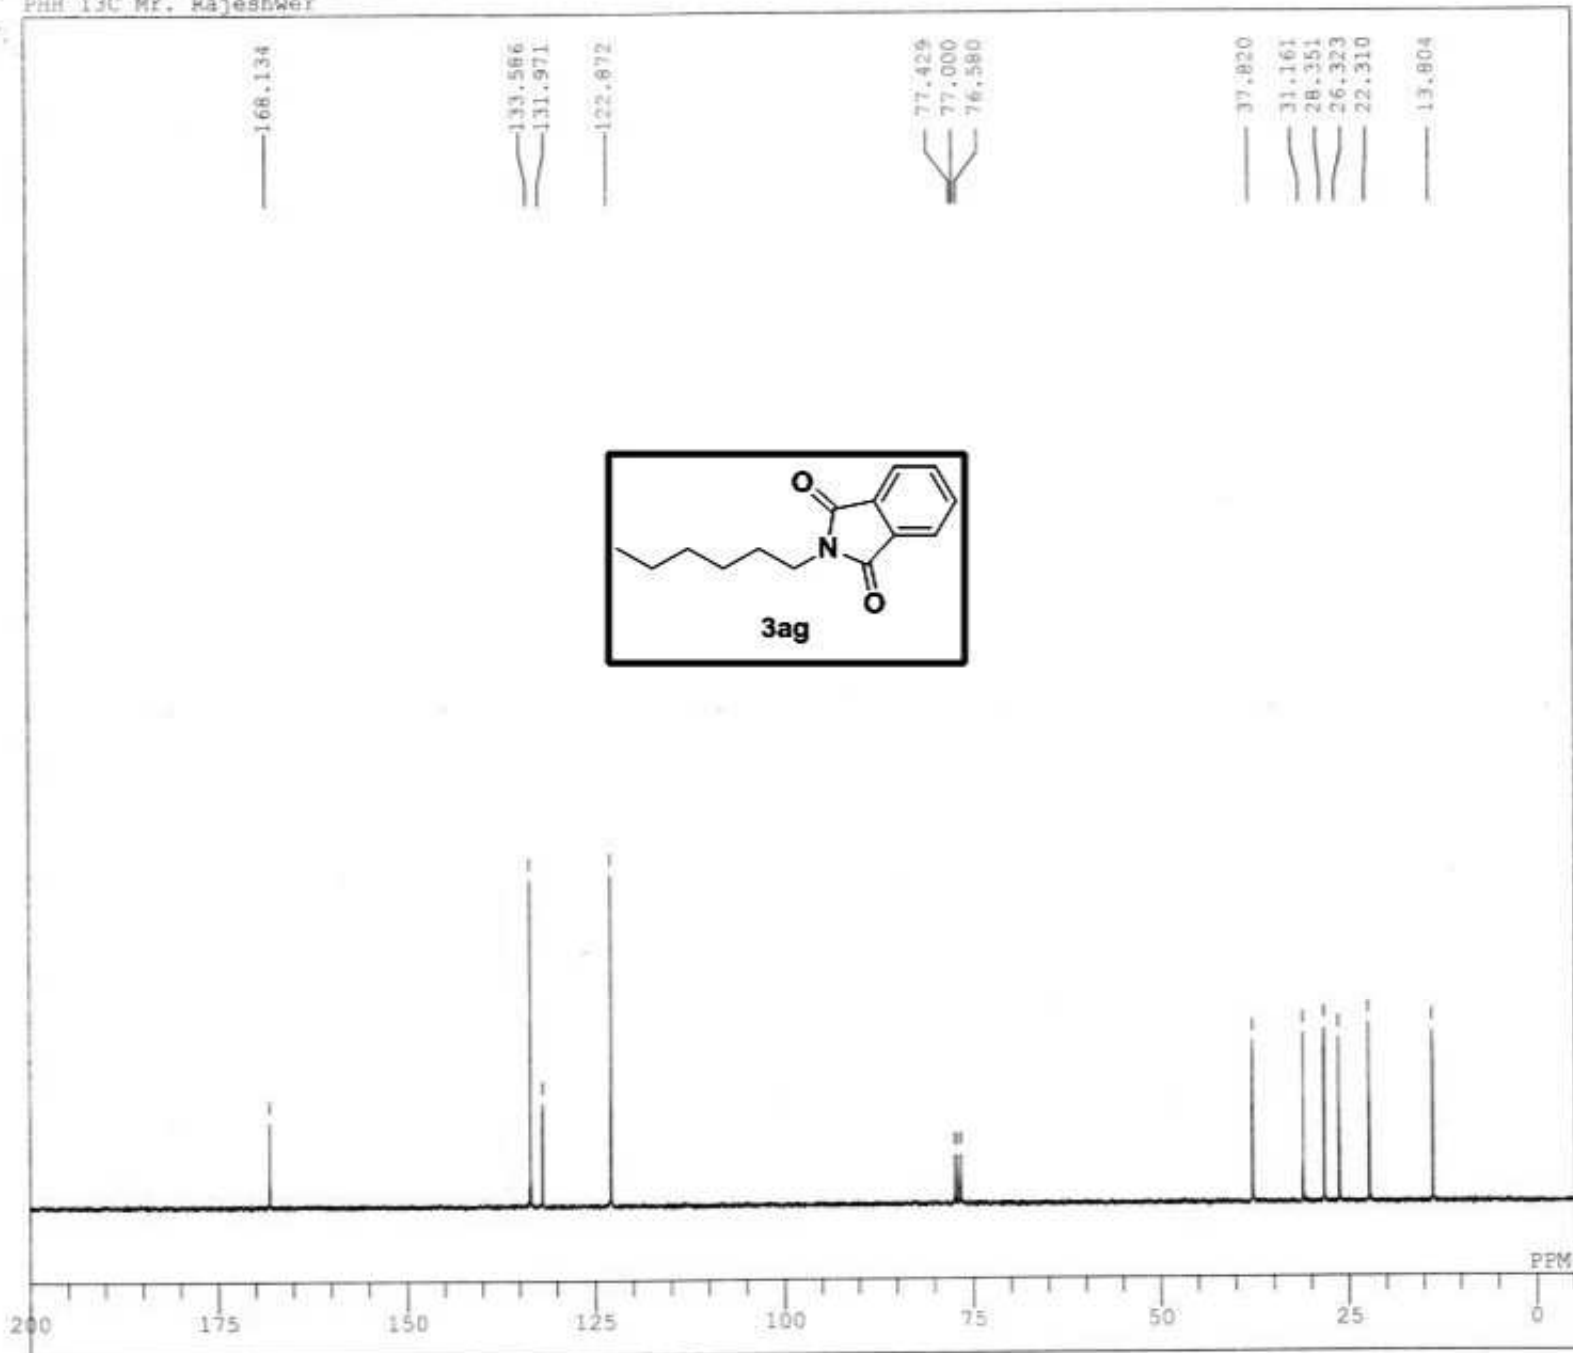

JEOL AL300 FTNMR  
CHEMISTRY DEPARTMENT  
Banaras Hindu University,  
VARANASI-221005

Operator : Nagendra Kumar  
Shishir Singh

DFILE C:\WINNMR98\COMMON\DEFAULT.  
COMNT PHH\_13C\_Mr. Rajeshwer  
DATIM Tue Sep 11 13:16:24 2012  
OBNUC 13C  
EXMOD BCM  
OBFRQ 75.45 MHz  
OBSET 127.30 KHz  
OBFIN 44.7 Hz  
POINT 32768  
FREQU 20408.1 Hz  
SCANS 32  
ACQTM 1.606 sec  
PD 1.394 sec  
PWI 6.0 us  
IRNUC 1H  
CTEMP 23.5 c  
SLVNT CDCL3  
EXREF 77.00 ppm  
BF 1.20 Hz  
RGAIN 23

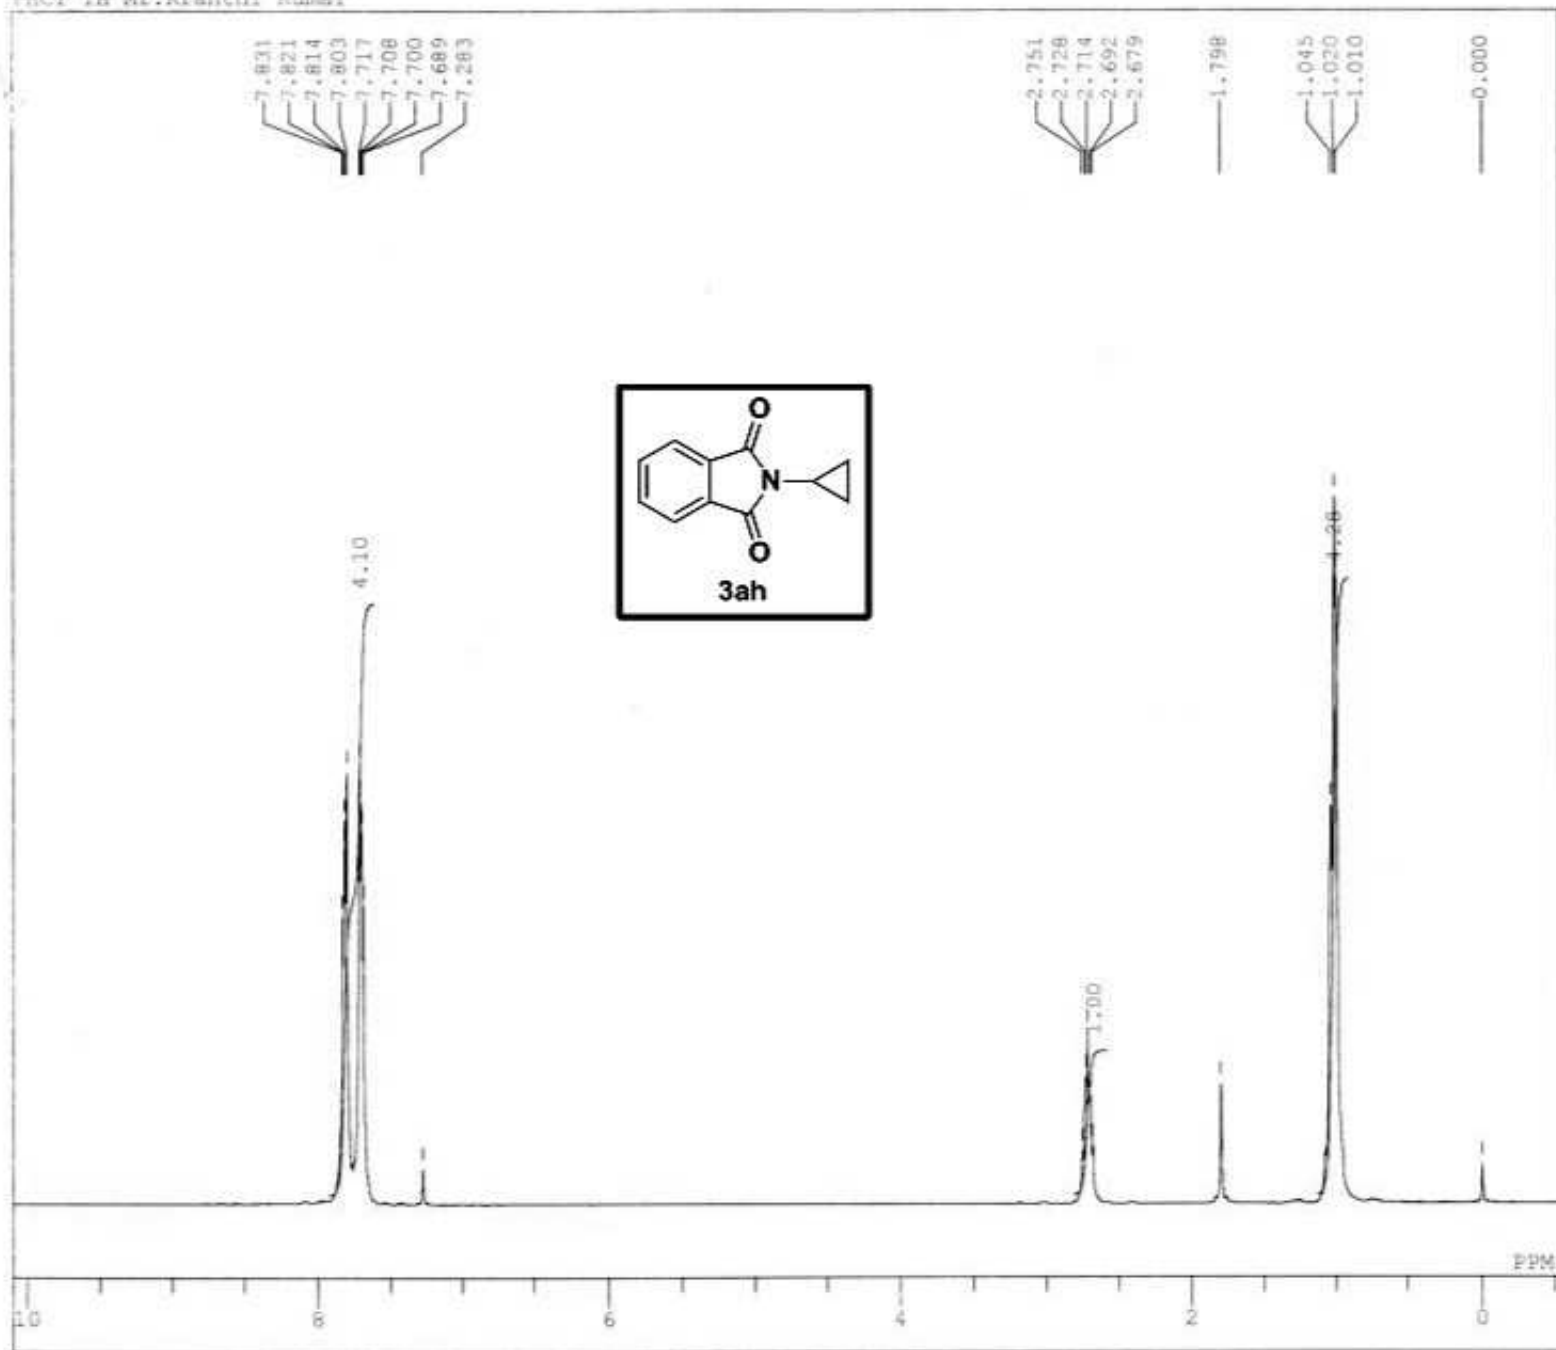

JEOL AL300 FTNMR  
CHEMISTRY DEPARTMENT  
Banaras Hindu University,  
VARAMASI-221005

Operator : Nagendra Kumar  
Shishir Singh

DFILE C:\WINNMR98\COMMON\DEFAULT.  
COMNT PHCY\_1H\_Mr.Kranthi\_Kumar  
DATIM Fri Sep 07 12:13:48 2012  
CHNUC 1H  
EXMOD NON  
OBFRQ 300.40 MHz  
OBSET 130.00 KHz  
OBFIN 1150.0 Hz  
POINT 32768  
FREQU 9505.7 Hz  
SCANS 12  
ACQTM 3.447 sec  
PD 1.547 sec  
PW1 5.2 us  
IRNUC 1H  
CTEMP 19.0 c  
SLVNT CDCL3  
EXREF 0.00 ppm  
BF 1.20 Hz  
RGAIN 14

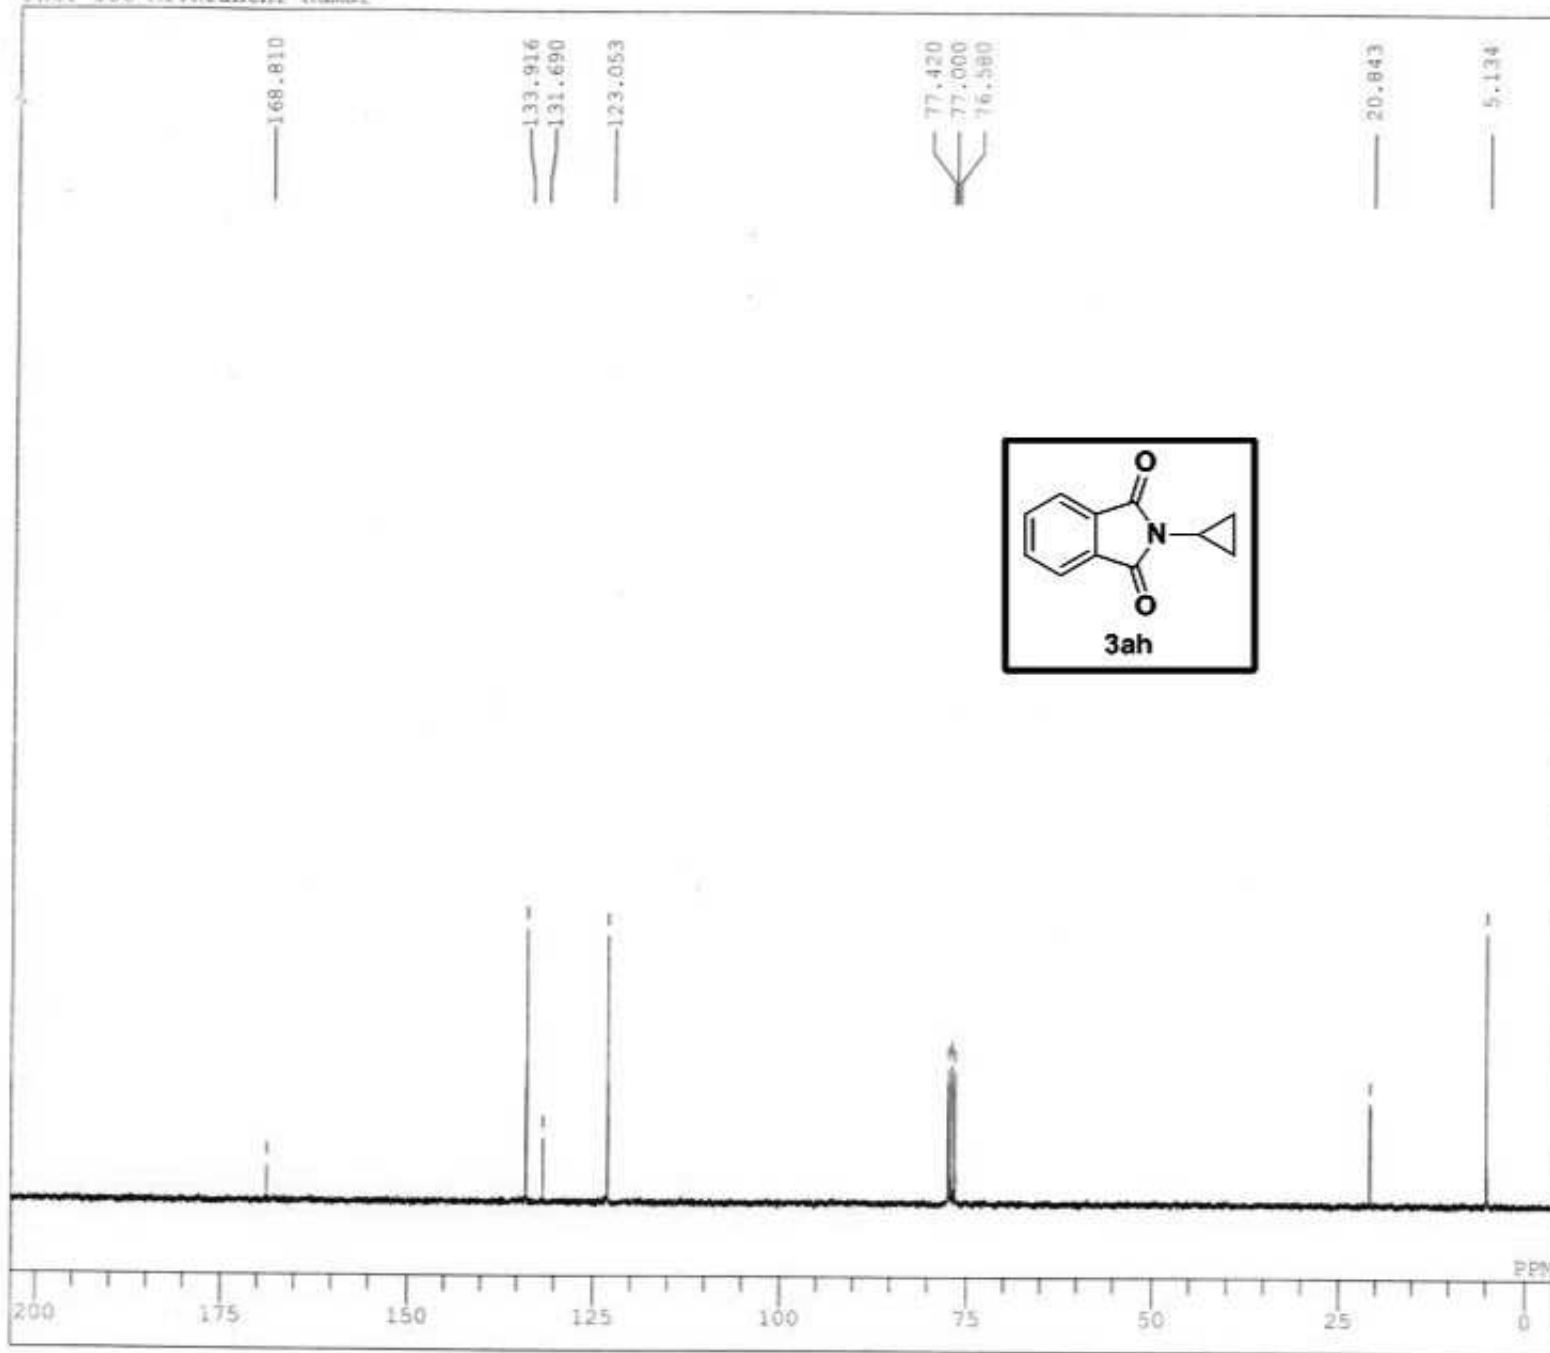

JEOL AL300 FTNMR  
CHEMISTRY DEPARTMENT  
Banaras Hindu University,  
VARANASI-221005

Operator : Nagendra Kumar  
Shishir Singh

OFIL C:\Krantaz K. Tunagala\PHCY\_13C  
COMNT PHCY\_13C\_Mr.Kranthi Kumar  
DATIM Fri Sep 07 12:22:13 2012  
OBNUC 13C  
EXMOD BCM  
OBFREQ 75.45 MHz  
OBSET 127.30 KHz  
OBFIN 44.7 Hz  
POINT 32768  
FREQU 20408.1 Hz  
SCANS 102  
ACQTM 1.606 sec  
PD 1.394 sec  
PW1 6.0 us  
IRNUC 1H  
CTEMP 22.5 c  
SLVNT CDCL3  
EXREP 77.00 ppm  
BF 1.20 Hz  
RGAIN 23

Pt.Bu 1H Mr.Rajeshwar

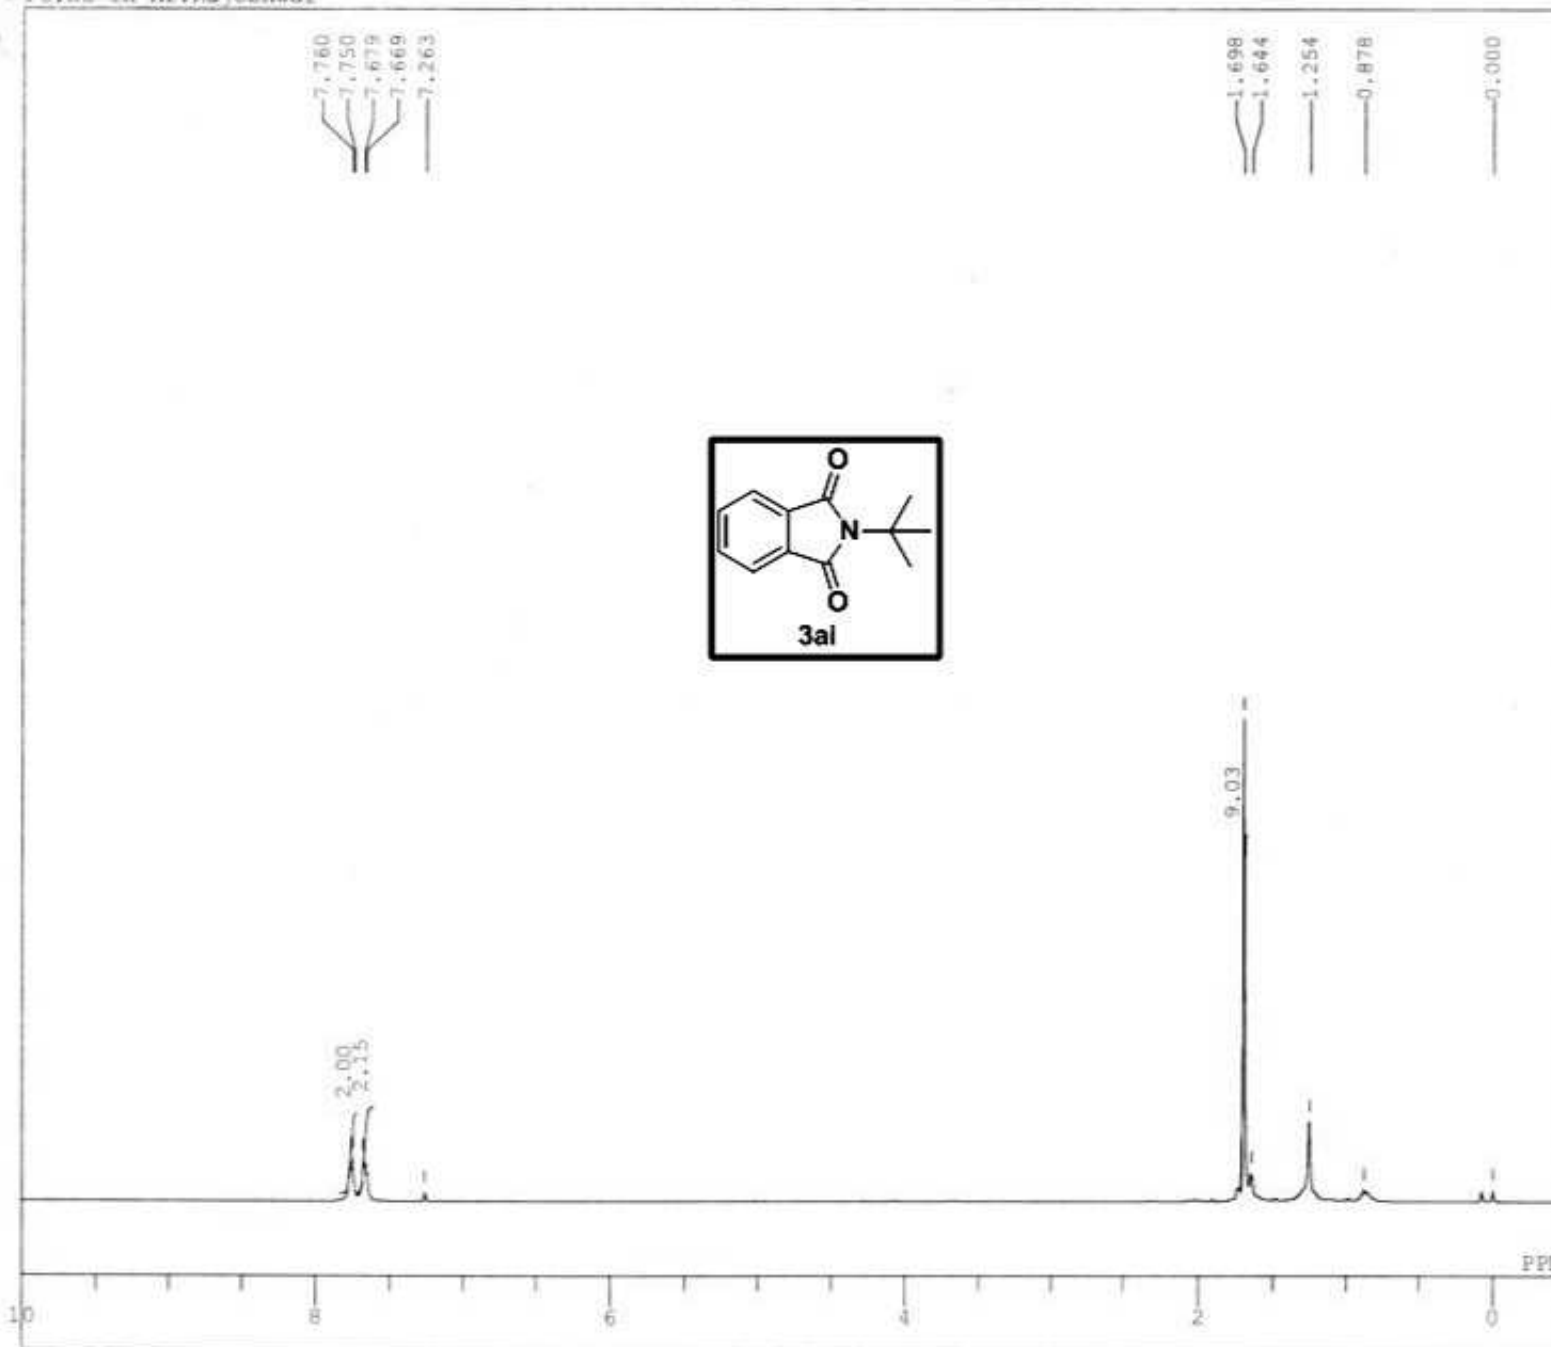

JEOL AL300 PTMNR  
CHEMISTRY DEPARTMENT  
Banaras Hindu University,  
VARANASI-221005

Operator : Nagendra Kumar  
Shishir Singh

DFILE C:\K.N. Singh,,I.T\Pt.Bu\_1H.  
COMNT Pt.Bu\_1H Mr.Rajeshwar  
DATIM Fri Sep 14 12:13:43 2012  
OBNUC 1H  
EXMOD NON  
OBFRQ 300.40 MHz  
OBSET 130.00 KHz  
OBFIN 1150.0 Hz  
POINT 32768  
FREQU 9505.7 Hz  
SCANS 44  
ACQTM 3.447 sec  
PD 1.547 sec  
PW1 5.2 us  
IRNUC 1H  
CTEMP 19.1 c  
SLVNT CDCL3  
EXREF 0.00 ppm  
BF 1.20 Hz  
RGAIN 15

Pt.Bu 1H Mr.Rajeshwar

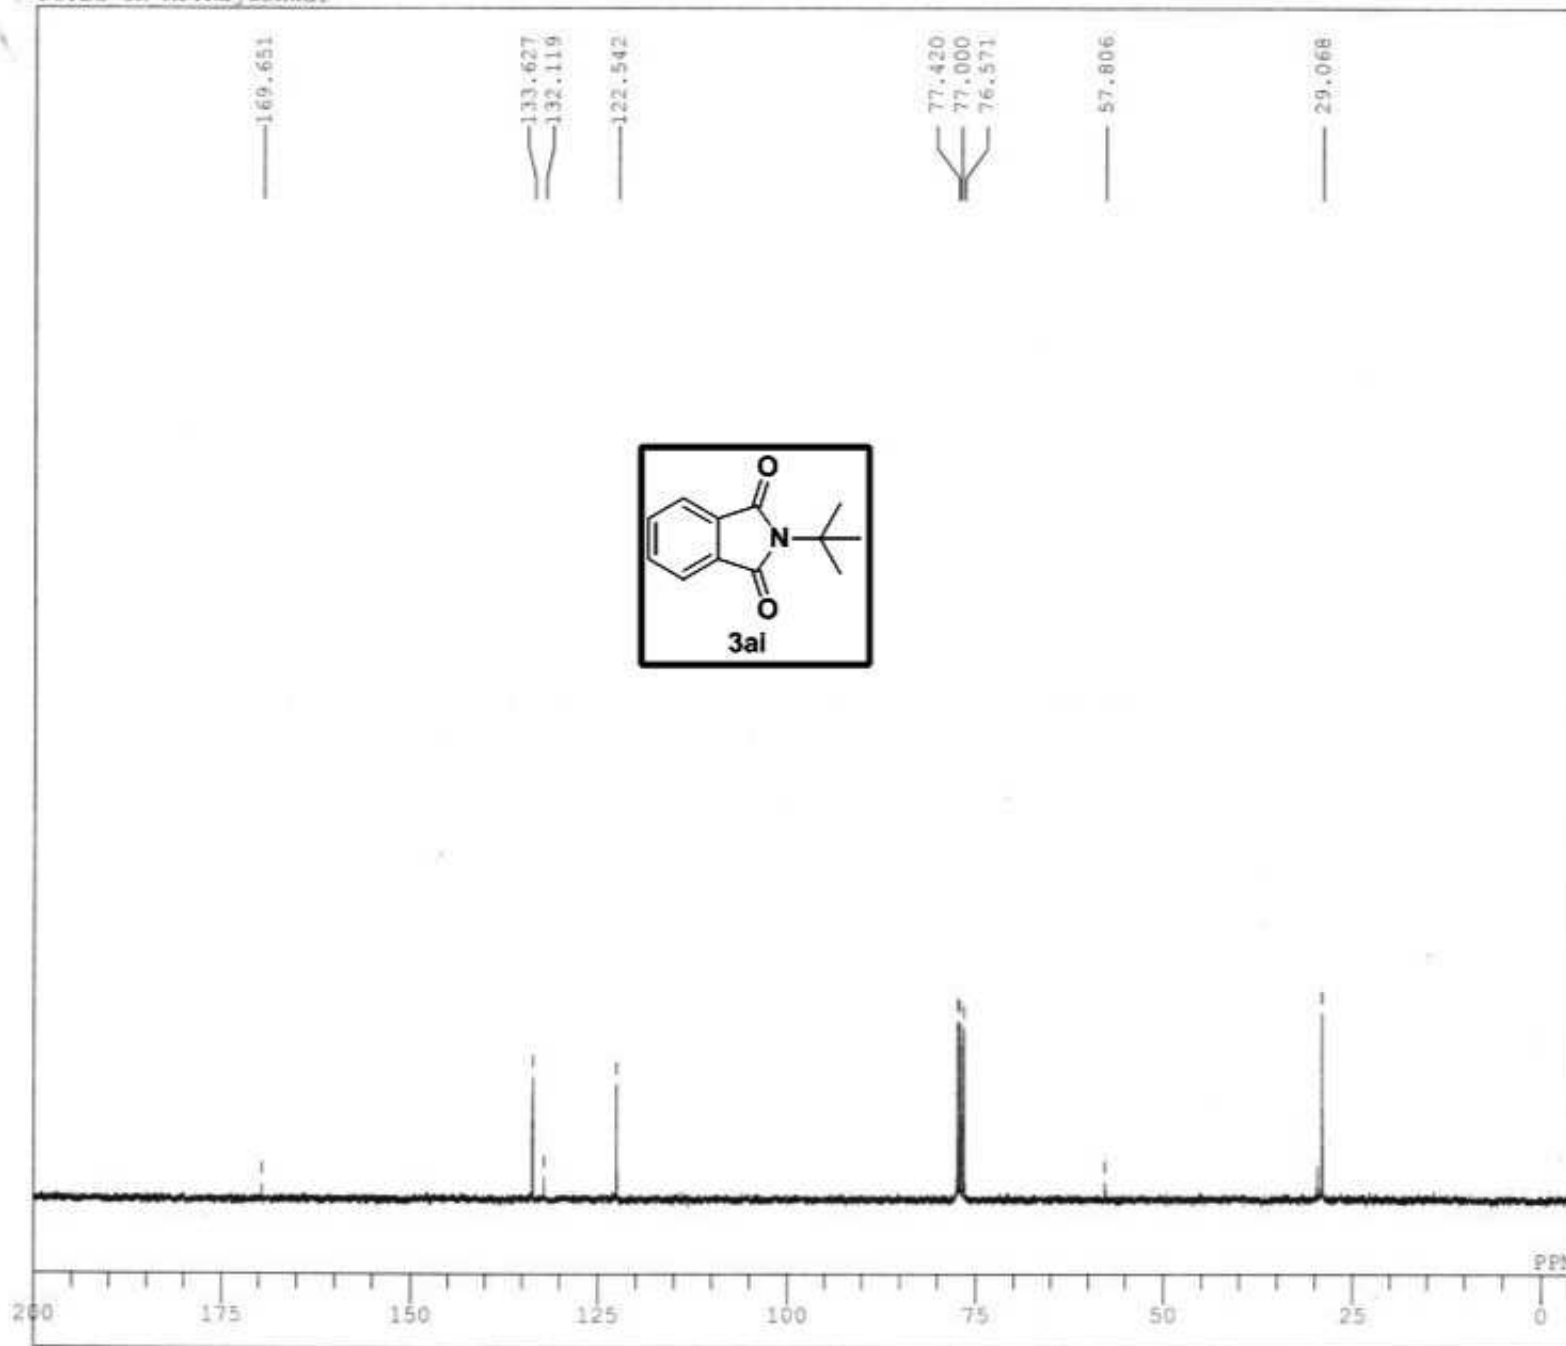

JEOL AL300 FTNMR  
CHEMISTRY DEPARTMENT  
Banaras Hindu University,  
VARANASI-221005

Operator : Nagendra Kumar  
Shishir Singh

DFILE C:\K.N. Singh,,I.T\Pt.Bu\_13C  
COMNT Pt.Bu 1H Mr.Rajeshwar  
DATIM Fri Sep 14 12:06:26 2012  
OBNUC 13C  
EXMOD BCM  
OBFRQ 75.45 MHz  
OBSET 127.30 KHz  
OBFIN 44.7 Hz  
POINT 32768  
FREQU 20408.1 Hz  
SCANS 230  
ACQTM 1.606 sec  
PD 1.394 sec  
FW1 6.0 us  
IRNUC 1H  
CTEMP 18.1 c  
SLVNT CDCL3  
EXREF 77.00 ppm  
BF 1.20 Hz  
RGAIN 23

C:\K.N. Singh,,I.T\PHE\_1H.als  
PHE\_1H Mr. Rajeshwer

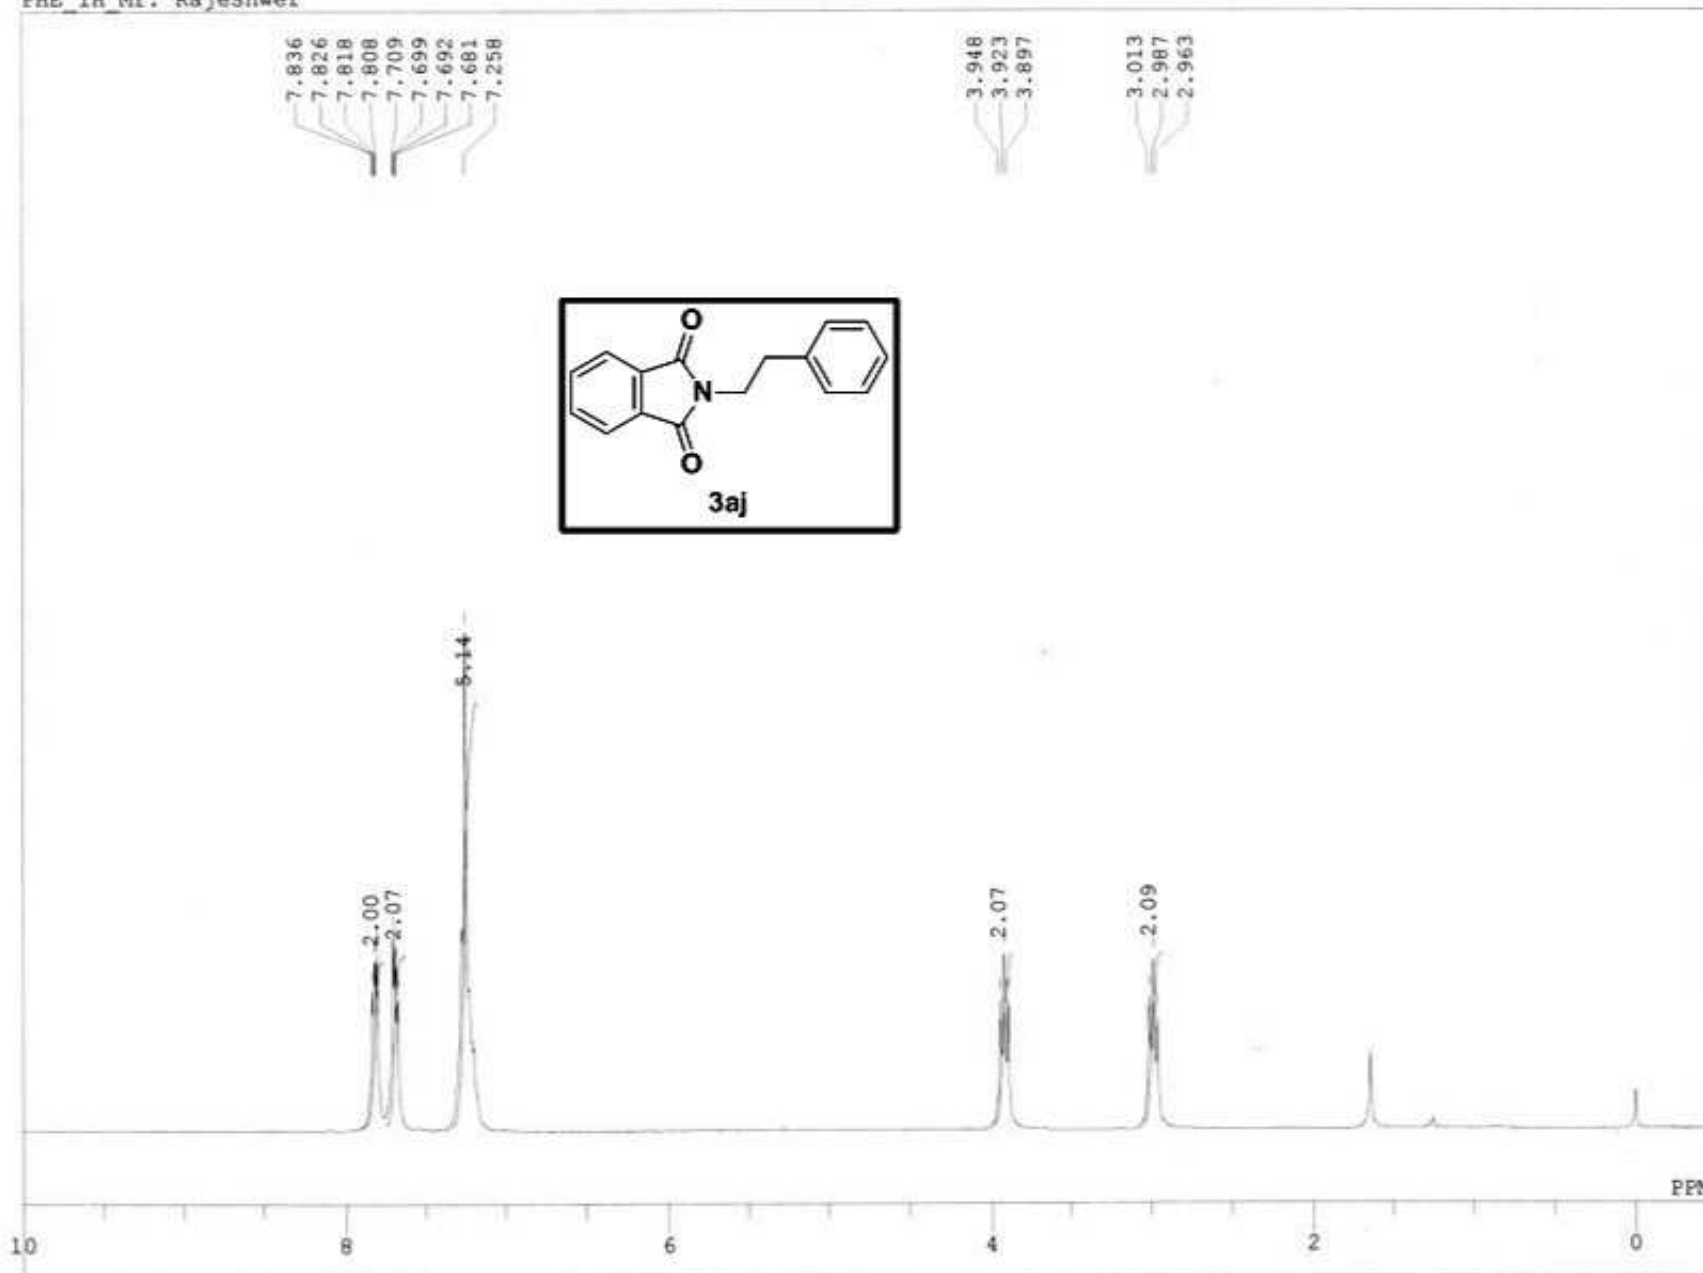

JEOL AL300 FTNMR  
CHEMISTRY DEPARTMENT  
Banaras Hindu University  
VARANASI-221005

Operator : Nagendra Kuma  
Shishir Singh

DFILE C:\K.N. Singh,,I.T\  
COMNT PHE\_1H Mr. Rajesh  
DATIM Mon Sep 10 15:04:  
OBNUC 1H  
EXMOD NON  
OBFRQ 300.40 MHz  
OBSET 130.00 KHz  
OBFIN 1150.0 Hz  
POINT 32768  
FREQU 6016.8 Hz  
SCANS 32  
ACQTM 5.446 sec  
PD 1.547 sec  
PW1 5.2 us  
IRNUC 1H  
CTEMP 20.0 c  
SLVNT CDCL3  
EXREF 0.00 ppm  
BF 1.20 Hz  
RGAIN 14

PHE 13C Mr. Rajeshwer

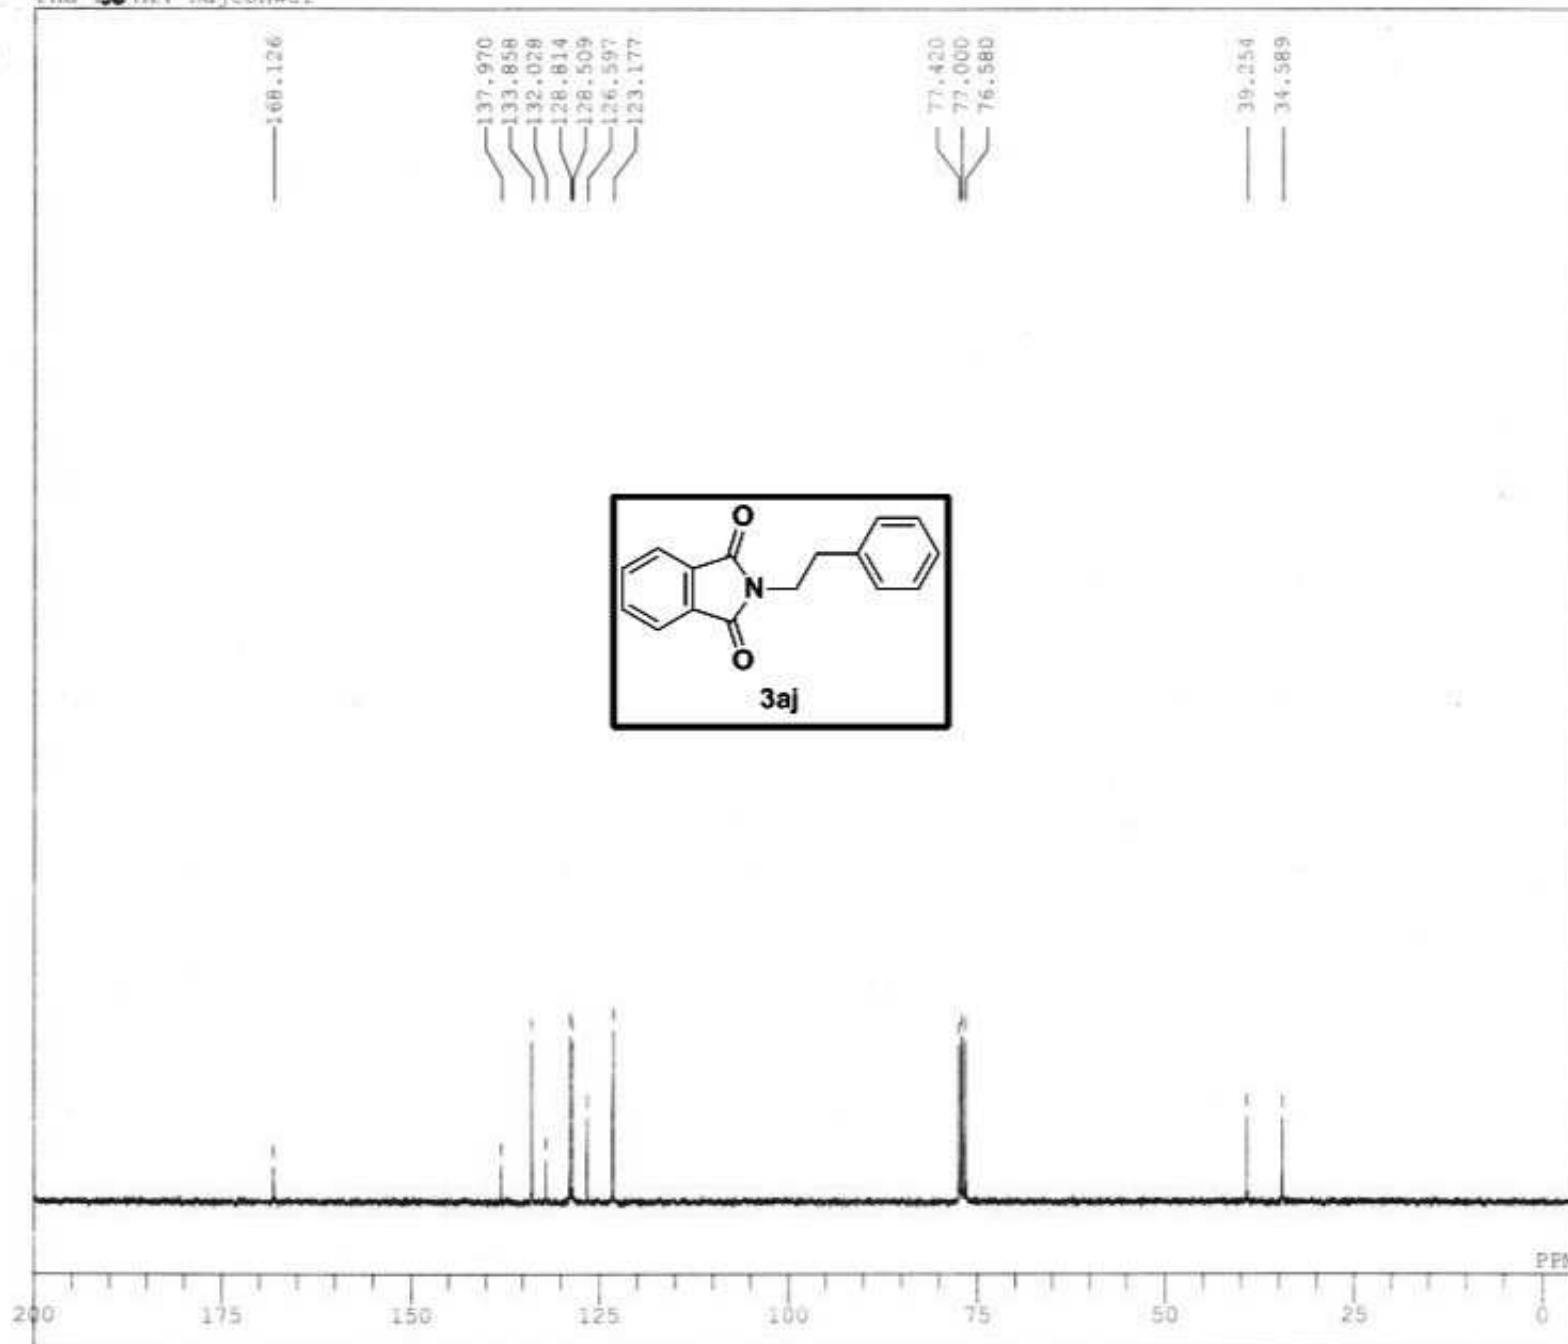

JEOL AL300 FTNMR  
CHEMISTRY DEPARTMENT  
Banaras Hindu University,  
VARANASI-221005

Operator : Nagendra Kumar  
Shishir Singh

DFILE C:\WINNMR98\Data\PHE\_1H2BCM  
COMNT PHE\_1H\_Mr. Rajeshwer  
DATIM Mon Sep 10 15:19:25 2012  
GBNUC 13C  
EXMOD BCM  
OBFRQ 75.45 MHz  
OBSET 127.30 KHz  
OBFIN 44.7 Hz  
POINT 32768  
FREQU 20408.1 Hz  
SCANS 250  
ACQTM 1.606 sec  
PD 1.394 sec  
PWL 6.0 us  
IRNUC 1H  
CTEMP 20.6 c  
SLVNT CDCL3  
EXREF 77.00 ppm  
BF 1.20 Hz  
RGAIN 24
